# Supplementary material for: Adherence to Gluten-Free Diet Restores Alpha Diversity in Celiac People but the Microbiome Composition Is Different to Healthy People
Source: MDPI journal article supplement (doi:10.3390/nu14122452), 2022-06-14
Supplement: s1 [file s1]

## Supplementary Data S2

**Table S5.** Median Bray-Curtis (“BC”) distances for CD samples with respect to the HC control set. Quantiles for control set “within” distances: 0.55 (0%); 0.77 (25%); 0.81 (50%); 0.86 (75%); 0.98 (100%). “Dysbiotic” 90% cut-off distance: 0.9094. BC pairwise dissimilarities were calculated through QIIME2, while dysbiotic cut-off and median distances were computed according from Lloyd-Pryce et al. 2019.

| Patient ID | Median distance |
|------------|-----------------|
| GF006      | 0.7898          |
| GF007      | 0.8031          |
| GF008      | 0.8029          |
| GF009      | 0.8033          |
| GF014      | 0.8837          |
| GF015      | 0.8318          |
| GF023      | 0.8256          |
| GF003      | 0.8328          |
| GF005      | 0.791           |
| GF011      | 0.7757          |
| GF013      | 0.7919          |
| GF018      | 0.7768          |
| GF019      | 0.8171          |
| GF025      | 0.7793          |
| GF028      | 0.7979          |
| GF029      | 0.7897          |
| GF031      | 0.7991          |
| GF033      | 0.7983          |
| GF017      | 0.785           |
| GF024      | 0.7742          |
| GF026      | 0.8193          |
| GF041      | 0.8153          |
| GF043      | 0.7827          |
| GF054      | 0.8022          |
| GF060      | 0.8118          |
| GF061      | 0.7711          |
| GF063      | 0.8234          |
| GF100      | 0.7632          |
| GF106      | 0.8411          |
| GF108      | 0.8246          |
| GF111      | 0.7903          |
| GF002      | 0.8147          |
| GF016      | 0.7487          |
| GF020      | 0.819           |
| GF027      | 0.8165          |
| GF032      | 0.7852          |
| GF037      | 0.8247          |
| GF044      | 0.807           |
| GF048      | 0.7748          |
| GF053      | 0.8675          |
| GF062      | 0.8616          |
| GF104      | 0.8005          |
| GF42       | 0.7978          |
| GF001      | 0.8099          |

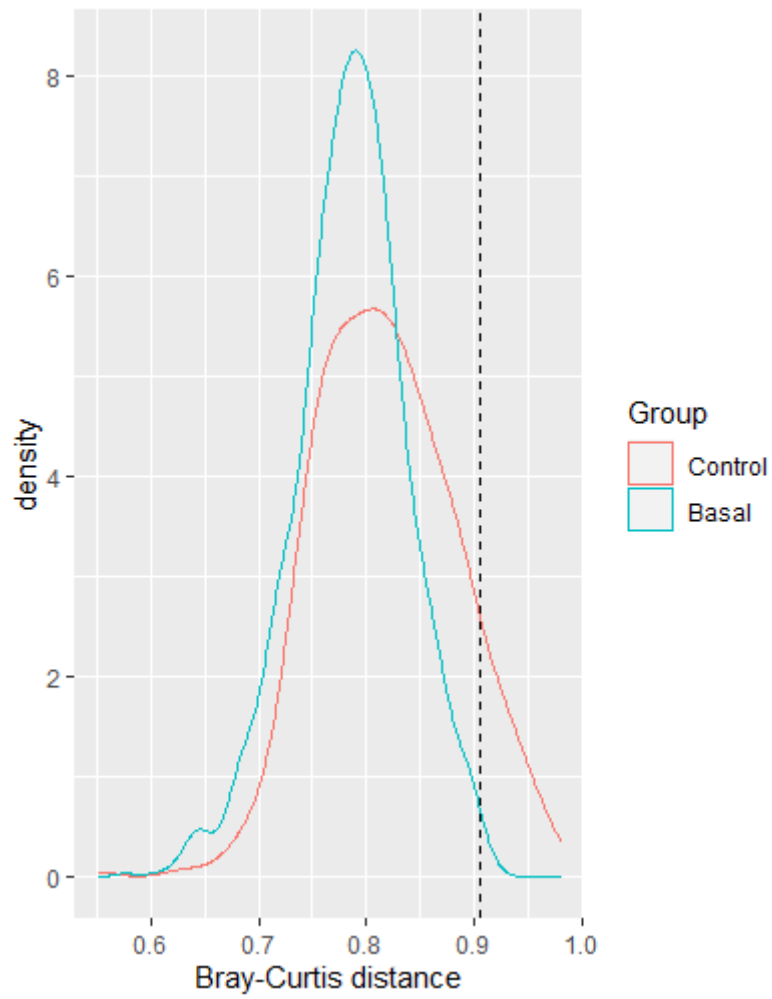

**Figure S10.** Density plot of BC distances in the HC (‘Control’) and CD (‘Basal’) sample sets. Dashed vertical line represents the “dysbiotic” distance cut-off, as computed through Lloyd-Price et al. 2019 method.

**basal**

Dissimilarity-Overlap analysis

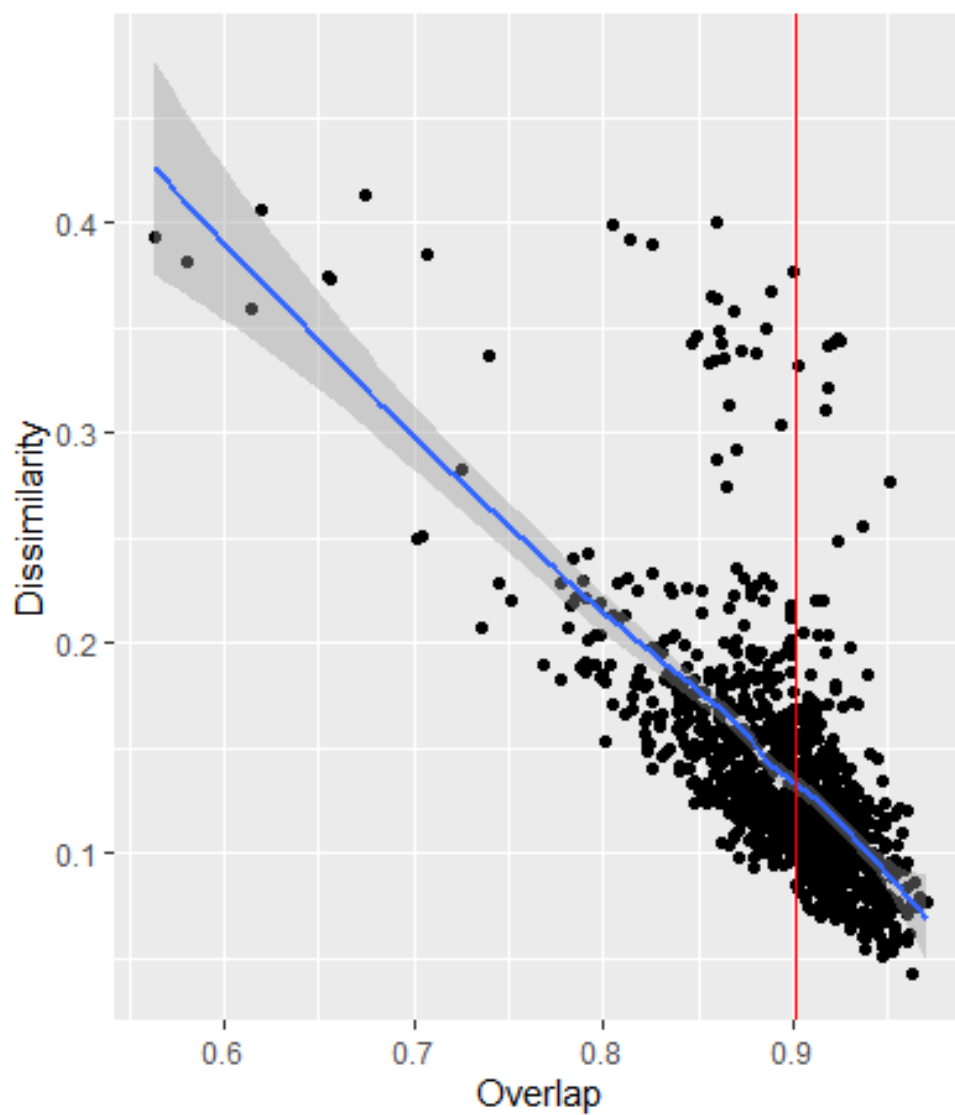

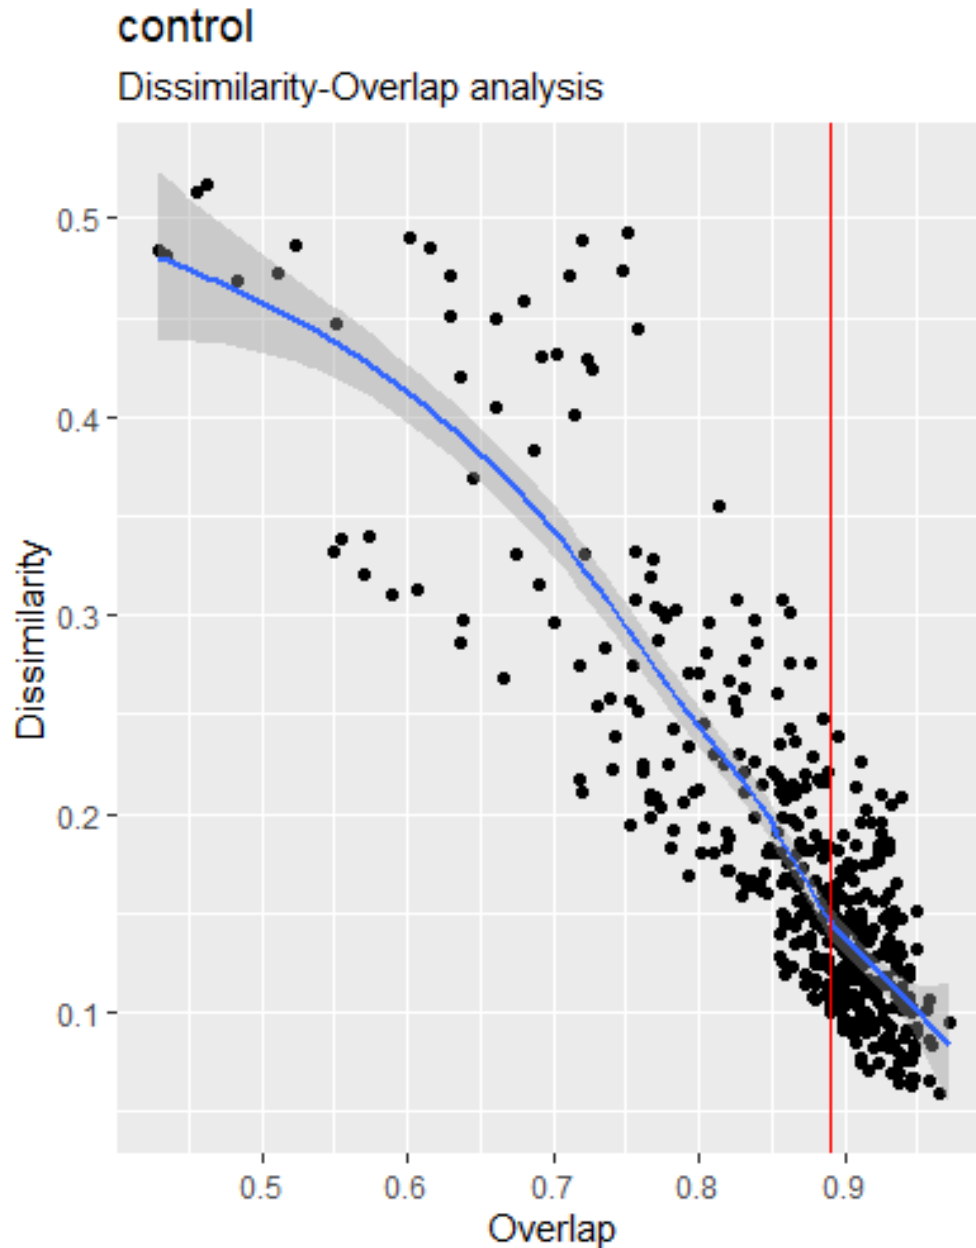

**Figures S11.** Scatterplots for the Dissimilarity vs. Overlap estimations within the CD (‘Basal’) and HC (‘Control’) sample sets. Analyses and plots were generated as described in <https://microbiome.github.io/tutorials/DOC.html>, by using the following R packages: Microbiome v.1.8.0, ggplot2\_3.3.3 and Phyloseq\_1.30.0. Smoothing method for regression curve: loess; vertical red lines represent the median Overlap value among sample pairs. Spearman correlation coefficient for pairwise Dissimilarity and Overlap distribution was -0.68 and -0.79 for the CD and HC sample sets, respectively. Negative slopes are indicative of a “healthy” microbial dynamics (Bashan et al. 2016).

**Table S6.** Results for the CLOUD test. Data shown were computed by using the Bray-Curtis dissimilarity matrix from QIIME2 diversity analysis, using dissimilarities between HC samples as “reference set” and setting “k” parameter = 5 (k nearest neighbours among the reference set with respect to the test sample). “K=5” represents approximately the 15% of reference sample size (total size = 31). “R\_stat” indicate the sample-specific ratio between the test sample neighbourhood diameter and the average neighbourhood diameter in the reference set. P-values < 0.05 indicate samples that are significant “outlier” (bold characters).(Montassier et al. 2018).

| SampleID | r_stat        | p-value  |
|----------|---------------|----------|
| GF001    | 0.5224        | 1        |
| GF006    | 0.5521        | 1        |
| GF007    | 0.9231        | 0.6444   |
| GF008    | 0.7515        | 1        |
| GF009    | 0.6429        | 1        |
| GF014    | <b>1.5993</b> | <b>0</b> |
| GF015    | 0.768         | 1        |
| GF023    | 0.6015        | 1        |
| GF003    | 0.7017        | 1        |
| GF005    | 0.6771        | 1        |
| GF011    | 0.7291        | 1        |
| GF013    | 0.6272        | 1        |
| GF018    | 0.7525        | 1        |
| GF019    | 0.6516        | 1        |
| GF025    | 0.6436        | 1        |
| GF028    | 0.5545        | 1        |
| GF029    | 0.7511        | 1        |
| GF031    | 0.7444        | 1        |
| GF033    | 0.7512        | 1        |
| GF017    | 0.5282        | 1        |
| GF024    | 0.5544        | 1        |
| GF026    | 0.6714        | 1        |
| GF040    | 1.0865        | 0.2      |
| GF041    | 0.9355        | 0.6      |
| GF043    | 0.7118        | 1        |
| GF054    | 0.481         | 1        |
| GF060    | 0.5927        | 1        |
| GF061    | 0.6995        | 1        |
| GF063    | 0.699         | 1        |
| GF100    | 0.5171        | 1        |
| GF105    | 0.7475        | 1        |
| GF106    | 0.9049        | 0.7111   |
| GF108    | 0.6412        | 1        |
| GF111    | 0.5398        | 1        |
| GF002    | 0.6393        | 1        |
| GF016    | 0.5762        | 1        |
| GF020    | 0.7138        | 1        |
| GF027    | 0.7373        | 1        |
| GF032    | 0.7715        | 1        |
| GF037    | 0.7506        | 1        |
| GF044    | 0.489         | 1        |
| GF048    | 0.5494        | 1        |
| GF053    | 0.632         | 1        |
| GF062    | 0.9009        | 0.7556   |
| GF104    | 0.751         | 1        |
| GF42     | 0.7019        | 1        |
