# Supplementary material for: Adherence to Gluten-Free Diet Restores Alpha Diversity in Celiac People but the Microbiome Composition Is Different to Healthy People
Source: Nutrients. 2022 Jun 14;14(12):2452. doi: 10.3390/nu14122452 (PMC9228530; doi:10.3390/nu14122452)
Supplement: Supplementary file 1 [file nutrients-14-02452-s001.zip]

Archive with 4 entries (4 files):
- Supplementary_Data S1.pdf
- Supplementary_Data S2.pdf
- Supplementary_Table S1.xlsx
- Supplementary_Table S2.xlsx
