# Supplementary material for: Adherence to Gluten-Free Diet Restores Alpha Diversity in Celiac People but the Microbiome Composition Is Different to Healthy People
Source: Nutrients. 2022 Jun 14;14(12):2452. doi: 10.3390/nu14122452 (PMC9228530; doi:10.3390/nu14122452)
Supplement: Supplementary file 1 [file nutrients-14-02452-s001.zip › Supplementary_Table S1.xlsx]

## Sheet: Guide
Table S1. microbial differential abundance analysis results by Coda_lasso, Clr_lasso, and Selbal methods
feature_table	Full feature table ('species' taxonomical level) as derived from QIIME2. Mitochondrial, plastid and ultra-rare features removed, as described in the manuscript.
ID-taxonomy	Association table between custom identifiers and QIIME taxonomical classification of features
diff_abun_results	Selected features from differential abundance analysis with Coda-lasso, Clr-lasso and Selbal methods. Columns A and B indicate feature classes and custom identifiers (sheet "ID_taxonomy").
	Common consistent features are evidenced in green/orange, while results are commented in column D. Columns E-H report weights of the selected features according the Coda_lasso and Clr_lasso tools.
	Selbal method does not provide weights. Note that methods can produce heterogenoeus, even inconsistent, outcomes: for example, feature125 (associated to Bifidobacterium longum) is detected as
	"abundant" in Class 0, while features 183 and 991 (same taxon) are reported as highly abundant in the opposite group (Class 1, i.e., CD samples).

## Sheet: feature_table
QIIME Feature ID	QIIME assigned taxonomy	Samples
		10C	11C	12C	1C	2C	4C	5C	6C	7C	8C	CON652SGR-06-09-2021	CON653SGR-20-10-2021	CON658SGR-06-09-2021	CON659SGR-06-09-2021	CON660SGR-08-09-2021	CON661SGR-06-10-2021	CON662SGR-06-10-2021	CON663SGR-06-10-2021	CON664SGR-07-10-2021	CON665SGR-08-10-2021	CON666SGR-13-10-2021	CON667SGR-14-10-2021	CON668SGR-30-12-2021	CON669SGR-30-12-2021	CON670SGR-30-12-2021	CON671SGR-30-12-2021	D01SGR-18-03-2021	D02SGR-22-04-2021	D03SGR-22-04-2021	D04SGR-23-06-2021	GF001	GF002	GF003	GF005	GF006	GF007	GF008	GF009	GF011	GF013	GF014	GF015	GF016	GF017	GF018	GF019	GF020	GF023
262d592219295fffb14d5ba3b6598965	k__Bacteria; p__Bacteroidetes; c__Bacteroidia; o__Bacteroidales; f__Bacteroidaceae; g__Bacteroides; s__uniformis	16.0	0.0	0.0	51.0	0.0	53.0	6.0	83.0	0.0	262.0	0.0	361.0	0.0	0.0	66.0	14.0	19.0	0.0	27.0	234.0	0.0	23.0	0.0	0.0	819.0	181.0	149.0	0.0	225.0	0.0	0.0	329.0	0.0	0.0	253.0	300.0	0.0	759.0	0.0	98.0	0.0	0.0	0.0	12.0	0.0	728.0	0.0	88.0
548dd8c5e9e5c56e9a0a8a02299e41b0	k__Bacteria; p__Firmicutes; c__Clostridia; o__Clostridiales; f__Ruminococcaceae; g__; s__	0.0	49.0	0.0	0.0	0.0	30.0	0.0	0.0	30.0	0.0	0.0	53.0	0.0	0.0	0.0	28.0	0.0	0.0	44.0	0.0	0.0	0.0	0.0	0.0	0.0	0.0	0.0	0.0	0.0	70.0	0.0	0.0	0.0	20.0	77.0	34.0	0.0	41.0	0.0	0.0	0.0	0.0	23.0	0.0	0.0	75.0	0.0	42.0
71469b3f6c975864065685e5f80e5482	k__Bacteria; p__Firmicutes; c__Clostridia; o__Clostridiales; f__Ruminococcaceae	0.0	0.0	0.0	0.0	0.0	0.0	0.0	0.0	0.0	0.0	0.0	0.0	0.0	0.0	0.0	0.0	0.0	0.0	0.0	76.0	0.0	0.0	0.0	0.0	0.0	0.0	47.0	0.0	20.0	0.0	39.0	0.0	0.0	0.0	0.0	0.0	0.0	0.0	0.0	0.0	0.0	0.0	41.0	0.0	0.0	0.0	0.0	0.0
62c8679209daea28cada4a0258692db7	k__Bacteria; p__Bacteroidetes; c__Bacteroidia; o__Bacteroidales; f__[Barnesiellaceae]; g__; s__	0.0	0.0	0.0	0.0	22.0	0.0	0.0	0.0	0.0	0.0	0.0	0.0	0.0	0.0	0.0	21.0	0.0	0.0	0.0	0.0	0.0	0.0	6.0	0.0	0.0	0.0	0.0	0.0	0.0	0.0	0.0	0.0	0.0	0.0	0.0	0.0	0.0	0.0	0.0	0.0	0.0	86.0	0.0	0.0	0.0	0.0	0.0	0.0
c3cf68f0f409a44a6a8c15d74c460df4	k__Bacteria; p__Bacteroidetes; c__Bacteroidia; o__Bacteroidales; f__Rikenellaceae; g__Alistipes; s__indistinctus	0.0	0.0	0.0	0.0	0.0	0.0	0.0	0.0	0.0	167.0	0.0	67.0	0.0	64.0	0.0	39.0	28.0	0.0	0.0	0.0	0.0	0.0	34.0	0.0	0.0	0.0	0.0	0.0	0.0	44.0	28.0	23.0	0.0	0.0	0.0	0.0	0.0	0.0	0.0	0.0	0.0	0.0	41.0	33.0	0.0	57.0	65.0	0.0
7bd30c87202b8b5964aed377d629d314	k__Bacteria; p__Bacteroidetes; c__Bacteroidia; o__Bacteroidales; f__Rikenellaceae	0.0	0.0	0.0	0.0	31.0	0.0	0.0	0.0	0.0	0.0	0.0	0.0	0.0	21.0	0.0	0.0	0.0	0.0	0.0	0.0	0.0	0.0	0.0	0.0	0.0	70.0	27.0	0.0	0.0	0.0	0.0	0.0	55.0	40.0	39.0	0.0	46.0	0.0	0.0	0.0	0.0	78.0	0.0	0.0	0.0	0.0	0.0	0.0
016cf8b9aa3ed3d481a3b3ecdf809e1d	k__Bacteria; p__Synergistetes; c__Synergistia; o__Synergistales; f__Dethiosulfovibrionaceae; g__Pyramidobacter; s__piscolens	0.0	0.0	0.0	0.0	0.0	0.0	0.0	0.0	0.0	0.0	0.0	0.0	0.0	0.0	0.0	0.0	0.0	0.0	0.0	0.0	0.0	0.0	0.0	0.0	0.0	0.0	0.0	0.0	0.0	0.0	0.0	0.0	0.0	37.0	0.0	0.0	0.0	0.0	0.0	0.0	0.0	0.0	0.0	0.0	0.0	36.0	15.0	0.0
958dcd8a9edc12d79f4d620afde0f478	k__Bacteria; p__Firmicutes; c__Clostridia; o__Clostridiales; f__Ruminococcaceae	0.0	0.0	0.0	0.0	0.0	0.0	0.0	0.0	0.0	0.0	30.0	0.0	0.0	0.0	0.0	0.0	0.0	32.0	0.0	0.0	0.0	0.0	66.0	0.0	0.0	0.0	0.0	0.0	0.0	0.0	54.0	48.0	0.0	0.0	0.0	47.0	39.0	0.0	0.0	0.0	0.0	0.0	0.0	0.0	0.0	0.0	0.0	0.0
abd1e214e89181e95c571db8ca2435a5	k__Bacteria; p__Proteobacteria; c__Gammaproteobacteria; o__Enterobacteriales; f__Enterobacteriaceae; g__Hafnia; s__alvei	0.0	0.0	0.0	0.0	0.0	0.0	0.0	0.0	0.0	6.0	0.0	0.0	0.0	16.0	0.0	0.0	0.0	15.0	0.0	0.0	0.0	0.0	0.0	0.0	0.0	0.0	0.0	0.0	0.0	0.0	14.0	0.0	0.0	0.0	0.0	0.0	0.0	16.0	0.0	0.0	19.0	0.0	0.0	0.0	0.0	0.0	0.0	21.0
d10402f744ec0af5c202e75d94020393	k__Bacteria; p__Firmicutes; c__Clostridia; o__Clostridiales; f__[Mogibacteriaceae]; g__; s__	0.0	0.0	0.0	0.0	0.0	0.0	0.0	0.0	0.0	0.0	0.0	0.0	0.0	0.0	0.0	0.0	0.0	0.0	0.0	0.0	0.0	0.0	0.0	0.0	0.0	0.0	0.0	0.0	0.0	0.0	0.0	0.0	0.0	0.0	0.0	0.0	0.0	55.0	0.0	0.0	0.0	0.0	0.0	0.0	0.0	0.0	0.0	8.0
1e388f35494800c1f015a5443ccc5cfc	k__Bacteria; p__Bacteroidetes; c__Bacteroidia; o__Bacteroidales; f__Bacteroidaceae; g__Bacteroides; s__	0.0	0.0	0.0	0.0	0.0	107.0	0.0	0.0	0.0	11.0	0.0	0.0	0.0	18.0	0.0	0.0	0.0	0.0	0.0	0.0	0.0	0.0	0.0	0.0	0.0	0.0	24.0	16.0	0.0	0.0	0.0	0.0	44.0	0.0	0.0	0.0	0.0	0.0	0.0	0.0	0.0	0.0	0.0	0.0	0.0	0.0	0.0	0.0
d8318a50505b8cdd26ed6e066a6c982d	k__Bacteria; p__Firmicutes; c__Clostridia; o__Clostridiales; f__Lachnospiraceae; g__; s__	0.0	0.0	0.0	0.0	0.0	0.0	0.0	0.0	0.0	0.0	0.0	0.0	0.0	0.0	29.0	0.0	0.0	0.0	0.0	71.0	0.0	0.0	0.0	37.0	0.0	0.0	48.0	51.0	0.0	0.0	0.0	0.0	0.0	0.0	14.0	16.0	0.0	0.0	0.0	0.0	0.0	0.0	0.0	0.0	0.0	0.0	0.0	26.0
8c73990064dc0003699b699acd0c3d6f	k__Bacteria; p__Bacteroidetes; c__Bacteroidia; o__Bacteroidales; f__Bacteroidaceae; g__Bacteroides; s__ovatus	18.0	0.0	0.0	0.0	0.0	0.0	0.0	34.0	8.0	55.0	0.0	160.0	0.0	0.0	23.0	27.0	0.0	0.0	84.0	32.0	24.0	0.0	0.0	0.0	39.0	0.0	37.0	0.0	0.0	0.0	110.0	0.0	0.0	0.0	0.0	6.0	186.0	45.0	0.0	234.0	71.0	17.0	78.0	0.0	45.0	0.0	17.0	104.0
c9479f90e8f0a69de4ad1fed19b68392	k__Bacteria; p__Bacteroidetes; c__Bacteroidia; o__Bacteroidales; f__[Odoribacteraceae]; g__Butyricimonas; s__	41.0	0.0	0.0	0.0	0.0	0.0	0.0	0.0	0.0	0.0	0.0	0.0	38.0	0.0	0.0	0.0	0.0	0.0	24.0	0.0	0.0	0.0	0.0	0.0	0.0	0.0	0.0	0.0	0.0	0.0	0.0	0.0	0.0	0.0	0.0	20.0	0.0	0.0	0.0	0.0	0.0	0.0	27.0	15.0	0.0	26.0	0.0	0.0
70876a2d22e6e07ecf018fd2d56d2961	k__Bacteria; p__Bacteroidetes; c__Bacteroidia; o__Bacteroidales; f__Rikenellaceae; g__; s__	0.0	0.0	0.0	0.0	0.0	0.0	0.0	0.0	0.0	27.0	0.0	0.0	0.0	0.0	0.0	0.0	0.0	0.0	0.0	23.0	0.0	0.0	0.0	0.0	0.0	0.0	0.0	0.0	0.0	0.0	0.0	0.0	0.0	0.0	0.0	24.0	0.0	29.0	0.0	0.0	0.0	0.0	0.0	0.0	0.0	0.0	26.0	0.0
94d6347c8f6fc4136086b8bffb9ac22e	k__Bacteria; p__Bacteroidetes; c__Bacteroidia; o__Bacteroidales; f__Bacteroidaceae; g__Bacteroides; s__	0.0	266.0	0.0	0.0	11.0	0.0	0.0	40.0	83.0	15.0	24.0	0.0	9.0	0.0	29.0	0.0	13.0	27.0	162.0	121.0	0.0	0.0	178.0	38.0	0.0	0.0	65.0	16.0	0.0	30.0	123.0	31.0	0.0	25.0	61.0	0.0	225.0	0.0	30.0	49.0	0.0	0.0	0.0	0.0	0.0	0.0	11.0	0.0
05d941ea02ebad752cd78f1f38845bd3	k__Bacteria; p__Bacteroidetes; c__Bacteroidia; o__Bacteroidales; f__Bacteroidaceae; g__Bacteroides; s__	0.0	0.0	0.0	0.0	22.0	0.0	0.0	129.0	0.0	0.0	0.0	0.0	5.0	5.0	0.0	0.0	0.0	0.0	0.0	0.0	0.0	0.0	0.0	105.0	0.0	0.0	0.0	347.0	0.0	0.0	0.0	0.0	0.0	0.0	665.0	0.0	0.0	0.0	25.0	0.0	0.0	0.0	0.0	54.0	0.0	0.0	0.0	0.0
016a0426d5c473f299a209e87a9e531c	k__Bacteria; p__Bacteroidetes; c__Bacteroidia; o__Bacteroidales; f__[Barnesiellaceae]; g__; s__	49.0	0.0	0.0	0.0	43.0	0.0	0.0	0.0	0.0	0.0	0.0	0.0	36.0	0.0	0.0	40.0	0.0	0.0	0.0	0.0	0.0	0.0	8.0	0.0	0.0	0.0	54.0	0.0	0.0	0.0	0.0	0.0	0.0	0.0	0.0	0.0	0.0	0.0	0.0	0.0	0.0	0.0	0.0	0.0	0.0	0.0	0.0	0.0
49ae27d69e7fbaceb829c2ae08250436	k__Bacteria; p__Firmicutes; c__Clostridia; o__Clostridiales; f__Ruminococcaceae; g__Oscillospira; s__	0.0	0.0	0.0	0.0	0.0	0.0	0.0	0.0	0.0	0.0	0.0	0.0	0.0	0.0	0.0	0.0	0.0	47.0	0.0	0.0	0.0	0.0	0.0	27.0	0.0	0.0	0.0	0.0	0.0	0.0	0.0	0.0	0.0	0.0	0.0	31.0	6.0	0.0	0.0	0.0	0.0	0.0	37.0	0.0	32.0	0.0	0.0	0.0
3c385a793494327ecb1cb88103a6ff00	k__Bacteria; p__Firmicutes; c__Clostridia; o__Clostridiales; f__Peptostreptococcaceae	0.0	0.0	0.0	0.0	45.0	0.0	0.0	23.0	0.0	0.0	0.0	0.0	0.0	0.0	0.0	0.0	0.0	0.0	0.0	0.0	0.0	0.0	0.0	0.0	0.0	0.0	0.0	0.0	0.0	0.0	0.0	0.0	0.0	0.0	12.0	0.0	0.0	0.0	0.0	0.0	17.0	0.0	0.0	0.0	0.0	0.0	0.0	0.0
2375f1061d7e6dcd26b6c869b73e2c90	k__Bacteria; p__Bacteroidetes; c__Bacteroidia; o__Bacteroidales; f__[Odoribacteraceae]; g__Butyricimonas; s__	0.0	0.0	0.0	0.0	36.0	0.0	0.0	0.0	0.0	0.0	0.0	0.0	0.0	0.0	0.0	0.0	0.0	0.0	0.0	0.0	0.0	0.0	0.0	0.0	0.0	0.0	0.0	0.0	0.0	0.0	15.0	0.0	67.0	0.0	0.0	0.0	0.0	48.0	33.0	0.0	0.0	0.0	0.0	0.0	0.0	0.0	0.0	0.0
3ed87eae740d6a80191e97cf9685ba22	k__Bacteria; p__Proteobacteria; c__Gammaproteobacteria; o__Enterobacteriales; f__Enterobacteriaceae	12.0	0.0	574.0	867.0	186.0	23.0	518.0	0.0	0.0	91.0	29.0	0.0	0.0	47.0	0.0	0.0	17.0	159.0	0.0	36.0	77.0	43.0	0.0	40.0	35.0	0.0	0.0	61.0	29.0	0.0	40.0	11.0	52.0	0.0	0.0	0.0	863.0	82.0	0.0	0.0	1490.0	180.0	0.0	0.0	0.0	0.0	30.0	17.0
e501223fc0b6ad56ef8b7e8d39f9346e	k__Bacteria; p__Firmicutes; c__Clostridia; o__Clostridiales; f__Veillonellaceae; g__Dialister; s__	0.0	0.0	0.0	55.0	0.0	0.0	20.0	0.0	0.0	0.0	0.0	33.0	0.0	0.0	0.0	0.0	0.0	0.0	31.0	0.0	44.0	21.0	0.0	0.0	40.0	1.0	22.0	0.0	0.0	0.0	0.0	0.0	0.0	19.0	0.0	0.0	0.0	0.0	0.0	0.0	0.0	0.0	38.0	0.0	0.0	15.0	0.0	36.0
afd083f60af3ebd1ee94d925f841ef54	k__Bacteria; p__Bacteroidetes; c__Bacteroidia; o__Bacteroidales; f__Bacteroidaceae; g__Bacteroides; s__fragilis	0.0	0.0	0.0	0.0	0.0	0.0	0.0	0.0	0.0	0.0	0.0	30.0	0.0	0.0	0.0	0.0	0.0	0.0	0.0	0.0	56.0	0.0	110.0	0.0	0.0	0.0	0.0	20.0	0.0	0.0	56.0	0.0	0.0	0.0	0.0	0.0	0.0	0.0	0.0	0.0	0.0	0.0	0.0	0.0	0.0	0.0	0.0	0.0
ac8ea5b07155c2b356a2d9d0d2486648	k__Bacteria; p__Actinobacteria; c__Actinobacteria; o__Bifidobacteriales; f__Bifidobacteriaceae; g__Bifidobacterium; s__	0.0	0.0	132.0	0.0	0.0	0.0	0.0	0.0	0.0	0.0	0.0	39.0	0.0	0.0	0.0	0.0	0.0	0.0	0.0	0.0	0.0	0.0	0.0	0.0	0.0	0.0	0.0	64.0	0.0	0.0	0.0	0.0	0.0	0.0	0.0	13.0	0.0	0.0	0.0	0.0	0.0	0.0	60.0	0.0	0.0	0.0	0.0	0.0
90003afc3aa4d58d0e05c747aa328cfb	k__Bacteria; p__Firmicutes; c__Clostridia; o__Clostridiales; f__Lachnospiraceae	0.0	38.0	0.0	0.0	0.0	17.0	0.0	0.0	0.0	56.0	0.0	93.0	0.0	79.0	95.0	0.0	0.0	32.0	0.0	68.0	0.0	63.0	71.0	117.0	0.0	63.0	52.0	0.0	25.0	0.0	45.0	58.0	0.0	0.0	33.0	15.0	0.0	0.0	24.0	69.0	0.0	0.0	34.0	74.0	65.0	0.0	0.0	35.0
f9a421e029eababe8a96e0588bc62683	k__Bacteria; p__Firmicutes; c__Clostridia; o__Clostridiales; f__Lachnospiraceae; g__Roseburia; s__	0.0	41.0	0.0	0.0	0.0	0.0	0.0	0.0	0.0	0.0	0.0	45.0	0.0	0.0	58.0	22.0	48.0	0.0	0.0	96.0	0.0	0.0	19.0	53.0	0.0	126.0	30.0	0.0	45.0	0.0	61.0	0.0	0.0	0.0	126.0	0.0	0.0	0.0	0.0	0.0	0.0	0.0	0.0	0.0	0.0	0.0	0.0	294.0
38062288e082620169e1276e776b079e	k__Bacteria; p__Firmicutes; c__Bacilli; o__Lactobacillales; f__Streptococcaceae; g__Streptococcus; s__	0.0	38.0	28.0	0.0	0.0	25.0	30.0	28.0	116.0	0.0	0.0	0.0	0.0	0.0	29.0	0.0	25.0	0.0	0.0	0.0	44.0	0.0	70.0	0.0	0.0	0.0	0.0	10.0	0.0	0.0	13.0	62.0	0.0	0.0	0.0	50.0	48.0	301.0	0.0	0.0	545.0	51.0	27.0	0.0	24.0	0.0	0.0	168.0
f915cf516b90f6746c87705066ea4848	k__Bacteria; p__Firmicutes; c__Clostridia; o__Clostridiales; f__Ruminococcaceae	0.0	0.0	0.0	0.0	0.0	0.0	0.0	0.0	0.0	15.0	29.0	0.0	0.0	0.0	0.0	22.0	88.0	92.0	0.0	0.0	0.0	0.0	0.0	0.0	0.0	0.0	92.0	42.0	105.0	0.0	0.0	0.0	0.0	0.0	71.0	0.0	170.0	61.0	0.0	452.0	0.0	104.0	0.0	0.0	327.0	38.0	0.0	0.0
8886e4fac1913e3f0dd66d9515295963	k__Bacteria; p__Firmicutes; c__Clostridia; o__Clostridiales; f__Ruminococcaceae; g__; s__	0.0	0.0	0.0	0.0	0.0	46.0	0.0	0.0	0.0	0.0	35.0	79.0	0.0	0.0	0.0	0.0	0.0	0.0	0.0	0.0	0.0	0.0	0.0	0.0	0.0	0.0	29.0	0.0	37.0	0.0	0.0	0.0	0.0	0.0	0.0	52.0	0.0	0.0	0.0	0.0	0.0	0.0	0.0	0.0	0.0	0.0	0.0	0.0
16bb1e43e4876f3741c0d9a27b0866de	k__Bacteria; p__Firmicutes; c__Clostridia; o__Clostridiales; f__Ruminococcaceae; g__Ruminococcus; s__	0.0	58.0	0.0	0.0	0.0	69.0	0.0	49.0	0.0	33.0	0.0	0.0	0.0	0.0	0.0	0.0	0.0	0.0	0.0	0.0	0.0	22.0	0.0	0.0	0.0	0.0	0.0	0.0	0.0	0.0	0.0	0.0	0.0	0.0	22.0	0.0	0.0	30.0	0.0	0.0	0.0	0.0	0.0	0.0	0.0	0.0	0.0	0.0
5d9d8c6f053eeee0faedd31cebf7f2aa	k__Bacteria; p__Firmicutes; c__Clostridia; o__Clostridiales; f__Ruminococcaceae; g__Faecalibacterium; s__prausnitzii	27.0	73.0	0.0	43.0	0.0	65.0	72.0	33.0	0.0	69.0	0.0	78.0	21.0	37.0	168.0	0.0	37.0	80.0	0.0	384.0	0.0	43.0	169.0	75.0	0.0	69.0	53.0	53.0	36.0	28.0	79.0	0.0	0.0	51.0	617.0	261.0	20.0	36.0	36.0	195.0	0.0	0.0	202.0	28.0	91.0	33.0	42.0	254.0
ebbaf0043e8b6985c2e305a522d8c138	k__Bacteria; p__Firmicutes; c__Clostridia; o__Clostridiales; f__Lachnospiraceae	0.0	0.0	0.0	0.0	0.0	0.0	0.0	0.0	0.0	0.0	0.0	31.0	0.0	0.0	0.0	0.0	0.0	0.0	0.0	0.0	0.0	0.0	0.0	0.0	0.0	19.0	0.0	0.0	0.0	0.0	10.0	0.0	0.0	0.0	70.0	31.0	0.0	0.0	78.0	0.0	0.0	0.0	0.0	0.0	0.0	0.0	0.0	30.0
c3ad0d342b593ebd317e7e175d361138	k__Bacteria; p__Firmicutes; c__Clostridia; o__Clostridiales; f__Ruminococcaceae; g__Gemmiger; s__formicilis	18.0	75.0	0.0	0.0	45.0	74.0	47.0	202.0	216.0	67.0	40.0	117.0	64.0	46.0	36.0	0.0	49.0	43.0	293.0	232.0	0.0	40.0	0.0	32.0	36.0	990.0	53.0	35.0	77.0	23.0	53.0	39.0	45.0	53.0	220.0	48.0	74.0	68.0	69.0	81.0	67.0	0.0	296.0	51.0	90.0	0.0	19.0	0.0
03207c07291ac5fefdef20d97a2b5e59	k__Bacteria; p__Firmicutes; c__Clostridia; o__Clostridiales; f__Lachnospiraceae	0.0	0.0	0.0	0.0	0.0	0.0	0.0	0.0	0.0	0.0	0.0	0.0	0.0	0.0	0.0	79.0	0.0	0.0	0.0	0.0	0.0	0.0	21.0	0.0	18.0	31.0	93.0	0.0	0.0	0.0	0.0	0.0	0.0	0.0	23.0	0.0	0.0	0.0	0.0	0.0	0.0	31.0	0.0	0.0	0.0	0.0	0.0	30.0
034f6e3b89b7d0b7e8ef5127d4f12b40	k__Bacteria; p__Proteobacteria; c__Betaproteobacteria; o__Burkholderiales; f__Alcaligenaceae; g__Sutterella; s__	0.0	0.0	0.0	0.0	0.0	0.0	0.0	0.0	0.0	0.0	0.0	0.0	0.0	0.0	0.0	0.0	15.0	0.0	0.0	45.0	369.0	0.0	0.0	0.0	29.0	99.0	0.0	0.0	0.0	0.0	0.0	0.0	0.0	0.0	0.0	0.0	0.0	0.0	0.0	0.0	0.0	0.0	0.0	0.0	0.0	0.0	0.0	0.0
3c05389fdc896ddf0647e35fb77159eb	k__Bacteria; p__Bacteroidetes; c__Bacteroidia; o__Bacteroidales; f__Rikenellaceae; g__Alistipes; s__finegoldii	0.0	0.0	0.0	0.0	104.0	0.0	0.0	0.0	0.0	0.0	0.0	0.0	0.0	0.0	0.0	28.0	0.0	0.0	0.0	0.0	0.0	22.0	105.0	0.0	0.0	33.0	0.0	0.0	0.0	0.0	0.0	0.0	0.0	0.0	0.0	0.0	0.0	0.0	0.0	0.0	0.0	0.0	0.0	0.0	0.0	31.0	0.0	0.0
6ea29f4fa90d8ba1d481c42e15fc191b	k__Bacteria; p__Firmicutes; c__Bacilli; o__Turicibacterales; f__Turicibacteraceae; g__Turicibacter; s__	0.0	0.0	8.0	0.0	0.0	0.0	0.0	0.0	0.0	36.0	0.0	0.0	0.0	0.0	0.0	0.0	0.0	0.0	0.0	0.0	0.0	0.0	0.0	0.0	0.0	0.0	0.0	10.0	0.0	0.0	0.0	0.0	0.0	0.0	87.0	0.0	0.0	0.0	0.0	0.0	0.0	0.0	0.0	0.0	0.0	0.0	0.0	6.0
e47293cb1a15bc02ef3a1e3288a634ef	k__Bacteria; p__Bacteroidetes; c__Bacteroidia; o__Bacteroidales; f__Bacteroidaceae; g__Bacteroides; s__	4.0	376.0	0.0	0.0	39.0	0.0	0.0	34.0	125.0	9.0	18.0	0.0	5.0	5.0	11.0	0.0	14.0	26.0	227.0	165.0	0.0	0.0	270.0	42.0	0.0	0.0	70.0	20.0	0.0	37.0	134.0	24.0	0.0	23.0	147.0	0.0	353.0	0.0	49.0	84.0	0.0	0.0	0.0	19.0	0.0	0.0	26.0	0.0
cbb5d6a087facc492f01bb5526dfa78a	k__Bacteria; p__Firmicutes; c__Clostridia; o__Clostridiales; f__Ruminococcaceae	0.0	0.0	0.0	0.0	0.0	41.0	0.0	0.0	0.0	0.0	13.0	58.0	0.0	0.0	0.0	0.0	0.0	0.0	0.0	0.0	0.0	0.0	0.0	0.0	0.0	0.0	57.0	0.0	0.0	0.0	0.0	0.0	0.0	0.0	0.0	0.0	0.0	0.0	0.0	0.0	0.0	0.0	0.0	0.0	0.0	0.0	0.0	0.0
890b11e468089f1fa8fd09b7c327a2ef	k__Bacteria; p__Firmicutes; c__Clostridia; o__Clostridiales; f__Lachnospiraceae; g__Coprococcus; s__	0.0	0.0	0.0	0.0	18.0	0.0	24.0	0.0	0.0	0.0	0.0	0.0	0.0	0.0	0.0	0.0	0.0	0.0	17.0	0.0	0.0	0.0	0.0	0.0	0.0	12.0	0.0	0.0	0.0	0.0	0.0	0.0	0.0	0.0	0.0	0.0	0.0	0.0	0.0	0.0	0.0	0.0	0.0	20.0	0.0	16.0	0.0	0.0
b5e364f98705f67dae2dc39ea868718d	k__Bacteria; p__Bacteroidetes; c__Bacteroidia; o__Bacteroidales; f__Bacteroidaceae; g__Bacteroides; s__caccae	70.0	0.0	0.0	0.0	170.0	0.0	26.0	28.0	3.0	0.0	0.0	0.0	0.0	0.0	29.0	0.0	45.0	0.0	0.0	67.0	46.0	0.0	0.0	312.0	127.0	0.0	56.0	0.0	0.0	0.0	0.0	30.0	0.0	0.0	75.0	62.0	59.0	49.0	0.0	0.0	0.0	783.0	0.0	0.0	32.0	23.0	0.0	155.0
43a2eb5f051a95fe380462d779bfbe2d	k__Bacteria; p__Firmicutes; c__Clostridia; o__Clostridiales; f__Ruminococcaceae	0.0	0.0	0.0	0.0	0.0	0.0	0.0	9.0	0.0	0.0	0.0	0.0	0.0	0.0	0.0	0.0	24.0	0.0	0.0	0.0	0.0	0.0	0.0	0.0	0.0	100.0	0.0	0.0	0.0	0.0	0.0	0.0	0.0	0.0	0.0	0.0	0.0	0.0	51.0	0.0	0.0	0.0	0.0	33.0	0.0	0.0	0.0	0.0
9d5335e2a174e51a57003d350a152984	k__Bacteria; p__Firmicutes; c__Clostridia; o__Clostridiales; f__Lachnospiraceae; g__Dorea; s__formicigenerans	0.0	0.0	0.0	53.0	0.0	52.0	41.0	0.0	0.0	46.0	0.0	0.0	0.0	68.0	52.0	24.0	41.0	0.0	15.0	0.0	0.0	0.0	0.0	64.0	44.0	42.0	65.0	31.0	0.0	24.0	37.0	0.0	0.0	0.0	54.0	19.0	45.0	0.0	0.0	0.0	0.0	41.0	0.0	33.0	0.0	0.0	0.0	38.0
f3ea3f91a0336976dd10ceb7d156d4d7	k__Bacteria; p__Firmicutes; c__Clostridia; o__Clostridiales; f__Lachnospiraceae; g__Clostridium; s__colinum	0.0	0.0	0.0	0.0	0.0	18.0	26.0	0.0	39.0	0.0	0.0	34.0	0.0	0.0	43.0	50.0	0.0	0.0	50.0	27.0	0.0	0.0	0.0	42.0	0.0	0.0	76.0	0.0	0.0	33.0	0.0	0.0	0.0	0.0	50.0	0.0	0.0	16.0	0.0	0.0	0.0	0.0	0.0	0.0	0.0	0.0	0.0	0.0
da4f342f7356d2b8db4a94e474a8497a	k__Bacteria; p__Firmicutes; c__Clostridia; o__Clostridiales; f__Lachnospiraceae; g__Blautia; s__	0.0	0.0	0.0	0.0	0.0	0.0	0.0	0.0	0.0	0.0	0.0	0.0	0.0	0.0	0.0	0.0	0.0	0.0	0.0	0.0	0.0	0.0	0.0	0.0	0.0	0.0	0.0	0.0	0.0	0.0	0.0	0.0	0.0	0.0	46.0	0.0	0.0	33.0	0.0	0.0	0.0	0.0	0.0	0.0	0.0	0.0	0.0	30.0
2a0f6cc2203ec06b6ee1fc6f0c009a5e	k__Bacteria; p__Firmicutes; c__Clostridia; o__Clostridiales; f__Ruminococcaceae; g__Oscillospira; s__	0.0	0.0	0.0	0.0	29.0	0.0	0.0	0.0	0.0	0.0	0.0	0.0	0.0	0.0	0.0	0.0	0.0	0.0	0.0	0.0	0.0	38.0	85.0	0.0	0.0	40.0	0.0	0.0	0.0	0.0	0.0	0.0	0.0	0.0	0.0	12.0	63.0	0.0	18.0	0.0	0.0	32.0	49.0	22.0	0.0	0.0	0.0	0.0
c11eba290748ea642e679831d5c0170a	k__Bacteria; p__Firmicutes; c__Clostridia; o__Clostridiales; f__Lachnospiraceae	0.0	0.0	0.0	0.0	0.0	0.0	60.0	0.0	0.0	0.0	0.0	0.0	0.0	0.0	0.0	0.0	0.0	72.0	29.0	0.0	16.0	91.0	94.0	85.0	0.0	82.0	26.0	77.0	0.0	0.0	0.0	0.0	0.0	0.0	76.0	69.0	0.0	182.0	0.0	0.0	0.0	0.0	24.0	0.0	0.0	0.0	0.0	0.0
813cb490d514e259df97d5d39606d27f	k__Bacteria; p__Firmicutes; c__Clostridia; o__Clostridiales; f__Lachnospiraceae; g__; s__	0.0	0.0	0.0	0.0	0.0	61.0	0.0	0.0	0.0	88.0	0.0	86.0	0.0	0.0	22.0	40.0	0.0	99.0	0.0	26.0	48.0	29.0	26.0	51.0	0.0	0.0	31.0	23.0	0.0	0.0	0.0	51.0	38.0	88.0	34.0	45.0	62.0	0.0	0.0	57.0	105.0	0.0	0.0	0.0	0.0	0.0	0.0	49.0
43540d9db64e2cd3c71dc9f6b879b043	k__Bacteria; p__Firmicutes; c__Clostridia; o__Clostridiales; f__Lachnospiraceae	0.0	0.0	0.0	0.0	0.0	0.0	34.0	0.0	67.0	0.0	0.0	0.0	0.0	0.0	0.0	0.0	0.0	0.0	32.0	0.0	29.0	0.0	0.0	0.0	0.0	0.0	0.0	0.0	0.0	0.0	0.0	0.0	0.0	0.0	0.0	0.0	0.0	69.0	0.0	0.0	0.0	0.0	0.0	0.0	0.0	0.0	0.0	0.0
79fd4829e99bcb7acbd049495149d407	k__Bacteria; p__Firmicutes; c__Clostridia; o__Clostridiales; f__Lachnospiraceae; g__; s__	33.0	0.0	0.0	43.0	0.0	39.0	54.0	0.0	0.0	33.0	0.0	0.0	31.0	0.0	24.0	0.0	42.0	22.0	36.0	26.0	348.0	42.0	55.0	127.0	34.0	0.0	46.0	54.0	0.0	44.0	45.0	33.0	0.0	0.0	47.0	0.0	0.0	0.0	53.0	42.0	0.0	14.0	26.0	36.0	49.0	45.0	0.0	66.0
833c68617851b3550e287ddf2bf0f60e	k__Bacteria; p__Firmicutes; c__Clostridia; o__Clostridiales; f__Lachnospiraceae	0.0	0.0	0.0	0.0	0.0	0.0	0.0	0.0	0.0	0.0	0.0	0.0	0.0	0.0	0.0	0.0	0.0	0.0	0.0	0.0	0.0	0.0	38.0	0.0	0.0	0.0	0.0	0.0	0.0	0.0	0.0	0.0	0.0	0.0	0.0	0.0	0.0	0.0	0.0	0.0	17.0	0.0	0.0	0.0	0.0	0.0	0.0	0.0
74ffe7e44bfc49c4cebdf1c97786cd22	k__Bacteria; p__Bacteroidetes; c__Bacteroidia; o__Bacteroidales; f__Rikenellaceae; g__Alistipes; s__putredinis	77.0	195.0	0.0	0.0	454.0	51.0	55.0	413.0	122.0	350.0	0.0	298.0	25.0	50.0	72.0	55.0	0.0	45.0	210.0	0.0	0.0	140.0	614.0	325.0	0.0	0.0	374.0	0.0	0.0	74.0	222.0	87.0	100.0	125.0	905.0	234.0	518.0	656.0	133.0	0.0	0.0	81.0	190.0	83.0	184.0	146.0	148.0	0.0
6469ac9679b84f591b4af3d5f563e23e	k__Bacteria; p__Firmicutes; c__Clostridia; o__Clostridiales; f__Lachnospiraceae; g__Blautia; s__	0.0	0.0	0.0	0.0	0.0	0.0	0.0	0.0	0.0	0.0	0.0	0.0	0.0	0.0	0.0	0.0	0.0	0.0	0.0	0.0	0.0	0.0	0.0	33.0	0.0	0.0	0.0	0.0	0.0	0.0	0.0	0.0	0.0	0.0	13.0	29.0	4.0	0.0	0.0	0.0	0.0	68.0	0.0	0.0	11.0	0.0	0.0	22.0
ca8a15cf236e6bae43ec2e6aee133a24	k__Bacteria; p__Firmicutes; c__Clostridia; o__Clostridiales; f__; g__; s__	0.0	0.0	0.0	0.0	0.0	0.0	0.0	0.0	0.0	0.0	62.0	0.0	17.0	0.0	44.0	0.0	0.0	0.0	0.0	0.0	0.0	0.0	0.0	29.0	0.0	0.0	37.0	0.0	0.0	0.0	0.0	0.0	0.0	0.0	55.0	0.0	15.0	0.0	0.0	0.0	0.0	17.0	34.0	0.0	0.0	0.0	0.0	0.0
a42c99dca95ad3b9d8e0a0d3098ddf2d	k__Bacteria; p__Firmicutes; c__Clostridia; o__Clostridiales; f__Lachnospiraceae	0.0	0.0	0.0	0.0	0.0	0.0	19.0	0.0	0.0	0.0	0.0	0.0	0.0	0.0	0.0	0.0	0.0	0.0	28.0	0.0	33.0	0.0	0.0	0.0	0.0	0.0	9.0	0.0	0.0	0.0	0.0	0.0	0.0	0.0	0.0	0.0	0.0	102.0	0.0	0.0	0.0	0.0	0.0	0.0	0.0	0.0	0.0	0.0
a3aeb2232efb5d14e7838398e1771cd9	k__Bacteria; p__Bacteroidetes; c__Bacteroidia; o__Bacteroidales; f__[Barnesiellaceae]; g__; s__	32.0	0.0	0.0	0.0	0.0	12.0	0.0	0.0	0.0	0.0	0.0	0.0	0.0	1.0	0.0	0.0	0.0	0.0	0.0	0.0	0.0	0.0	0.0	0.0	0.0	0.0	354.0	0.0	0.0	0.0	0.0	0.0	161.0	0.0	661.0	0.0	0.0	0.0	0.0	0.0	0.0	0.0	68.0	0.0	0.0	0.0	0.0	0.0
e3d71a476d11c6ebcb99d861e2875407	k__Bacteria; p__Firmicutes; c__Clostridia; o__Clostridiales; f__Lachnospiraceae; g__Coprococcus; s__	0.0	0.0	75.0	0.0	46.0	42.0	19.0	0.0	0.0	0.0	0.0	47.0	18.0	0.0	14.0	64.0	36.0	0.0	0.0	0.0	0.0	0.0	46.0	43.0	13.0	23.0	0.0	30.0	0.0	0.0	26.0	0.0	0.0	0.0	60.0	18.0	27.0	36.0	17.0	0.0	0.0	30.0	16.0	17.0	0.0	0.0	0.0	23.0
d5ef3cf26d40c61b6699bad27b2c07a6	k__Bacteria; p__Firmicutes; c__Clostridia; o__Clostridiales; f__Ruminococcaceae; g__Butyricicoccus; s__pullicaecorum	0.0	0.0	0.0	0.0	0.0	0.0	43.0	0.0	43.0	0.0	0.0	0.0	0.0	0.0	0.0	0.0	0.0	0.0	0.0	0.0	0.0	32.0	0.0	89.0	0.0	0.0	0.0	41.0	0.0	45.0	0.0	0.0	0.0	0.0	50.0	0.0	55.0	0.0	0.0	0.0	25.0	0.0	0.0	0.0	0.0	0.0	0.0	0.0
a6d575875809858f88a24094bd7fa8b3	k__Bacteria; p__Firmicutes; c__Clostridia; o__Clostridiales; f__Peptostreptococcaceae	42.0	52.0	46.0	28.0	241.0	32.0	60.0	142.0	48.0	33.0	0.0	39.0	0.0	57.0	0.0	47.0	28.0	40.0	30.0	0.0	36.0	0.0	0.0	52.0	44.0	56.0	67.0	103.0	60.0	41.0	44.0	0.0	49.0	43.0	325.0	0.0	67.0	124.0	0.0	0.0	84.0	0.0	47.0	33.0	48.0	0.0	30.0	78.0
f07ef90579f50491b812bb8ae89e54aa	k__Bacteria; p__Firmicutes; c__Clostridia; o__Clostridiales; f__Ruminococcaceae; g__Faecalibacterium; s__prausnitzii	9.0	21.0	0.0	27.0	0.0	39.0	199.0	105.0	260.0	107.0	19.0	82.0	95.0	30.0	39.0	46.0	46.0	110.0	47.0	63.0	104.0	11.0	45.0	22.0	105.0	75.0	25.0	118.0	29.0	21.0	276.0	29.0	75.0	47.0	358.0	79.0	26.0	41.0	36.0	35.0	28.0	40.0	22.0	33.0	16.0	175.0	34.0	59.0
fed2a0c70a92fb025beb3672e9762ddf	k__Bacteria; p__Firmicutes; c__Clostridia; o__Clostridiales; f__Lachnospiraceae; g__Coprococcus; s__	0.0	0.0	0.0	0.0	0.0	0.0	0.0	0.0	0.0	0.0	0.0	0.0	0.0	0.0	0.0	0.0	0.0	0.0	0.0	0.0	0.0	0.0	0.0	0.0	0.0	0.0	0.0	0.0	0.0	0.0	19.0	0.0	0.0	0.0	0.0	0.0	0.0	13.0	0.0	0.0	0.0	0.0	25.0	0.0	0.0	0.0	0.0	0.0
f6f3b8ad73208447dfa4873bd8756332	k__Bacteria; p__Bacteroidetes; c__Bacteroidia; o__Bacteroidales; f__Bacteroidaceae; g__Bacteroides; s__eggerthii	0.0	0.0	0.0	0.0	71.0	66.0	0.0	0.0	0.0	27.0	0.0	0.0	0.0	0.0	0.0	43.0	180.0	0.0	0.0	0.0	0.0	0.0	555.0	0.0	0.0	0.0	0.0	0.0	0.0	0.0	0.0	203.0	0.0	0.0	2321.0	0.0	0.0	0.0	0.0	0.0	0.0	0.0	0.0	1049.0	0.0	0.0	0.0	0.0
1bc6b6b399a71f9b35008a0dc3c0bdfd	k__Bacteria; p__Firmicutes; c__Clostridia; o__Clostridiales; f__Ruminococcaceae; g__Oscillospira; s__	0.0	27.0	0.0	0.0	0.0	18.0	31.0	19.0	0.0	36.0	50.0	0.0	0.0	30.0	0.0	0.0	0.0	0.0	0.0	0.0	0.0	0.0	0.0	0.0	0.0	0.0	33.0	57.0	53.0	0.0	0.0	0.0	0.0	52.0	33.0	20.0	54.0	0.0	0.0	0.0	0.0	42.0	36.0	53.0	54.0	0.0	0.0	51.0
63d7305eb68b6d810eb65dbcd2e30980	k__Bacteria; p__Firmicutes; c__Clostridia; o__Clostridiales	0.0	0.0	0.0	0.0	9.0	0.0	0.0	0.0	0.0	0.0	0.0	0.0	0.0	0.0	0.0	0.0	0.0	0.0	0.0	0.0	0.0	0.0	56.0	0.0	0.0	0.0	0.0	0.0	0.0	0.0	0.0	0.0	0.0	0.0	0.0	0.0	0.0	0.0	0.0	0.0	0.0	0.0	0.0	0.0	0.0	0.0	0.0	0.0
dd3d86b60d656b1649a4f78f4e6325f8	k__Bacteria; p__Firmicutes; c__Clostridia; o__Clostridiales; f__Ruminococcaceae; g__Faecalibacterium; s__prausnitzii	0.0	84.0	0.0	37.0	0.0	19.0	105.0	44.0	149.0	212.0	20.0	37.0	24.0	31.0	176.0	104.0	27.0	68.0	34.0	36.0	0.0	35.0	424.0	117.0	0.0	45.0	48.0	86.0	0.0	26.0	237.0	39.0	0.0	0.0	414.0	73.0	110.0	0.0	95.0	0.0	0.0	12.0	106.0	98.0	64.0	47.0	17.0	172.0
c0becf9f1e6580218e51e9c8e837d360	k__Bacteria; p__Firmicutes; c__Clostridia; o__Clostridiales; f__Christensenellaceae; g__; s__	0.0	61.0	0.0	0.0	0.0	0.0	0.0	0.0	0.0	69.0	0.0	0.0	0.0	0.0	0.0	0.0	0.0	0.0	0.0	0.0	0.0	0.0	0.0	0.0	0.0	0.0	0.0	0.0	0.0	21.0	0.0	0.0	0.0	0.0	25.0	40.0	0.0	0.0	0.0	0.0	0.0	25.0	0.0	0.0	0.0	0.0	29.0	0.0
c8b8c3f8cdeb454dbd327784058e479f	k__Bacteria; p__Actinobacteria; c__Coriobacteriia; o__Coriobacteriales; f__Coriobacteriaceae; g__Collinsella; s__aerofaciens	47.0	0.0	0.0	0.0	0.0	0.0	7.0	13.0	0.0	36.0	0.0	26.0	0.0	34.0	0.0	34.0	24.0	0.0	0.0	0.0	107.0	0.0	70.0	0.0	0.0	0.0	0.0	0.0	0.0	0.0	0.0	0.0	0.0	0.0	97.0	0.0	0.0	29.0	13.0	0.0	37.0	0.0	0.0	0.0	0.0	0.0	16.0	245.0
172c10c2bc8ac98c13a804c5e172c5b1	k__Bacteria; p__Firmicutes; c__Clostridia; o__Clostridiales; f__Ruminococcaceae; g__Oscillospira; s__	0.0	0.0	0.0	0.0	0.0	37.0	0.0	0.0	0.0	256.0	0.0	0.0	0.0	38.0	0.0	0.0	0.0	42.0	0.0	0.0	0.0	0.0	0.0	0.0	0.0	0.0	33.0	0.0	0.0	0.0	0.0	0.0	26.0	44.0	11.0	0.0	0.0	0.0	0.0	0.0	0.0	0.0	0.0	0.0	0.0	0.0	0.0	23.0
fa86f949ab77b6e2b730d1d838bf41a8	k__Bacteria; p__Firmicutes; c__Clostridia; o__Clostridiales; f__Lachnospiraceae	0.0	0.0	0.0	0.0	0.0	0.0	34.0	0.0	0.0	24.0	0.0	0.0	0.0	0.0	0.0	0.0	0.0	71.0	0.0	0.0	0.0	0.0	0.0	0.0	0.0	0.0	0.0	0.0	0.0	0.0	0.0	0.0	0.0	0.0	22.0	35.0	0.0	0.0	0.0	0.0	0.0	0.0	0.0	0.0	56.0	0.0	0.0	0.0
3211cf7fa42d46ca8ecc7539cfea24b5	k__Bacteria; p__Firmicutes; c__Erysipelotrichi; o__Erysipelotrichales; f__Erysipelotrichaceae; g__; s__	0.0	51.0	0.0	0.0	0.0	18.0	0.0	0.0	165.0	0.0	0.0	0.0	0.0	0.0	0.0	0.0	0.0	0.0	0.0	0.0	0.0	0.0	0.0	0.0	0.0	0.0	0.0	0.0	0.0	0.0	0.0	0.0	0.0	0.0	0.0	4.0	0.0	0.0	22.0	0.0	0.0	0.0	0.0	0.0	0.0	0.0	0.0	0.0
418d86c28f32531c8c286b9271eaaf9c	k__Bacteria; p__Firmicutes; c__Clostridia; o__Clostridiales; f__Ruminococcaceae	0.0	0.0	0.0	0.0	0.0	0.0	0.0	0.0	0.0	0.0	0.0	0.0	0.0	0.0	0.0	0.0	0.0	0.0	0.0	0.0	0.0	0.0	0.0	0.0	0.0	0.0	0.0	0.0	0.0	0.0	0.0	0.0	0.0	0.0	0.0	0.0	0.0	0.0	0.0	37.0	0.0	0.0	0.0	0.0	45.0	0.0	0.0	30.0
d7184b2ab4040d01f69b2e222640bd7e	k__Bacteria; p__Firmicutes; c__Clostridia; o__Clostridiales; f__Lachnospiraceae; g__Clostridium; s__symbiosum	0.0	0.0	0.0	0.0	54.0	0.0	0.0	0.0	0.0	0.0	0.0	0.0	0.0	0.0	0.0	33.0	0.0	0.0	0.0	0.0	0.0	0.0	0.0	0.0	39.0	0.0	0.0	0.0	0.0	0.0	0.0	0.0	0.0	0.0	0.0	0.0	0.0	0.0	0.0	0.0	0.0	0.0	0.0	0.0	0.0	0.0	0.0	25.0
3909e482c0261d2e280dde0529670c02	k__Bacteria; p__Firmicutes; c__Clostridia; o__Clostridiales; f__Ruminococcaceae; g__; s__	0.0	35.0	0.0	0.0	0.0	32.0	0.0	0.0	0.0	0.0	0.0	0.0	0.0	0.0	0.0	0.0	0.0	0.0	0.0	0.0	0.0	0.0	0.0	0.0	0.0	0.0	0.0	0.0	0.0	0.0	0.0	34.0	0.0	0.0	0.0	0.0	0.0	0.0	23.0	0.0	0.0	53.0	0.0	0.0	0.0	0.0	0.0	0.0
b243a35ba11e5db94393becab0f208ef	k__Bacteria; p__Firmicutes; c__Clostridia; o__Clostridiales; f__Veillonellaceae; g__Phascolarctobacterium; s__	0.0	0.0	0.0	0.0	0.0	0.0	0.0	0.0	0.0	322.0	0.0	0.0	24.0	186.0	0.0	0.0	7.0	0.0	0.0	0.0	0.0	0.0	0.0	0.0	0.0	0.0	0.0	0.0	0.0	0.0	0.0	0.0	0.0	0.0	0.0	0.0	0.0	0.0	0.0	0.0	0.0	0.0	0.0	27.0	0.0	0.0	21.0	0.0
24a970bd88bec600f4ab57b5915aebca	k__Bacteria; p__Firmicutes; c__Clostridia; o__Clostridiales; f__Ruminococcaceae; g__Ruminococcus; s__	0.0	0.0	0.0	0.0	26.0	0.0	7.0	0.0	0.0	0.0	0.0	0.0	0.0	0.0	0.0	0.0	0.0	0.0	0.0	0.0	0.0	0.0	0.0	0.0	7.0	0.0	0.0	0.0	0.0	28.0	0.0	0.0	0.0	0.0	0.0	0.0	0.0	8.0	0.0	0.0	0.0	0.0	0.0	0.0	0.0	0.0	0.0	13.0
fda444dff3bdcff11cdc4d8817428c4c	k__Bacteria; p__Firmicutes; c__Clostridia; o__Clostridiales; f__Lachnospiraceae	0.0	0.0	0.0	0.0	0.0	0.0	0.0	0.0	0.0	90.0	0.0	0.0	0.0	0.0	0.0	66.0	0.0	0.0	0.0	0.0	27.0	0.0	0.0	0.0	0.0	0.0	0.0	0.0	0.0	0.0	45.0	0.0	0.0	0.0	0.0	0.0	32.0	4.0	0.0	0.0	0.0	0.0	0.0	0.0	0.0	0.0	0.0	32.0
55384bd992897774035f9ce96497fa9c	k__Bacteria; p__Firmicutes; c__Clostridia; o__Clostridiales; f__Ruminococcaceae	0.0	0.0	0.0	0.0	0.0	0.0	0.0	0.0	0.0	0.0	0.0	0.0	0.0	0.0	0.0	27.0	47.0	0.0	0.0	0.0	0.0	0.0	0.0	0.0	0.0	0.0	17.0	0.0	0.0	0.0	0.0	0.0	0.0	0.0	0.0	0.0	0.0	0.0	0.0	50.0	0.0	0.0	0.0	0.0	32.0	0.0	0.0	15.0
f3ff2fa83f96f098bb2d96a80534f33c	k__Bacteria; p__Firmicutes; c__Clostridia; o__Clostridiales; f__Ruminococcaceae; g__Ruminococcus; s__	13.0	0.0	0.0	0.0	0.0	0.0	0.0	0.0	34.0	0.0	0.0	0.0	25.0	0.0	0.0	37.0	0.0	0.0	0.0	44.0	0.0	0.0	0.0	0.0	0.0	84.0	0.0	0.0	0.0	50.0	0.0	0.0	0.0	0.0	0.0	915.0	0.0	0.0	0.0	72.0	0.0	0.0	0.0	0.0	0.0	0.0	0.0	0.0
ef7d735ac9f6203cf6fc0ad8cb383ccb	k__Bacteria; p__Actinobacteria; c__Coriobacteriia; o__Coriobacteriales; f__Coriobacteriaceae; g__Collinsella; s__aerofaciens	0.0	24.0	0.0	0.0	0.0	12.0	27.0	35.0	73.0	71.0	41.0	52.0	19.0	76.0	35.0	79.0	31.0	67.0	71.0	0.0	258.0	0.0	0.0	0.0	0.0	0.0	51.0	105.0	56.0	0.0	0.0	0.0	37.0	0.0	205.0	0.0	65.0	39.0	0.0	0.0	85.0	69.0	34.0	40.0	68.0	105.0	17.0	506.0
711ecd5cf2f2e298ad49920f1d1d6f2b	k__Bacteria; p__Firmicutes; c__Clostridia; o__Clostridiales; f__Lachnospiraceae; g__Lachnospira; s__	0.0	23.0	0.0	0.0	0.0	0.0	36.0	0.0	0.0	0.0	31.0	0.0	0.0	14.0	158.0	0.0	0.0	32.0	0.0	0.0	81.0	0.0	0.0	0.0	0.0	0.0	30.0	0.0	43.0	0.0	34.0	0.0	0.0	0.0	0.0	0.0	0.0	0.0	40.0	0.0	0.0	0.0	0.0	0.0	38.0	0.0	0.0	0.0
e49f5ca90396ea8f3f8826de7fff0bfc	k__Bacteria; p__Firmicutes; c__Clostridia; o__Clostridiales; f__Ruminococcaceae; g__Oscillospira; s__	0.0	0.0	0.0	0.0	0.0	0.0	58.0	0.0	85.0	30.0	52.0	56.0	30.0	0.0	0.0	35.0	0.0	0.0	43.0	0.0	0.0	0.0	76.0	0.0	36.0	0.0	0.0	0.0	0.0	39.0	31.0	0.0	0.0	0.0	49.0	21.0	20.0	0.0	0.0	22.0	30.0	24.0	0.0	0.0	66.0	26.0	18.0	37.0
c48ecd81a7e5153b16f2103f0bcc1e85	k__Bacteria; p__Firmicutes; c__Clostridia; o__Clostridiales; f__Lachnospiraceae; g__Coprococcus; s__	0.0	0.0	68.0	0.0	0.0	18.0	0.0	0.0	0.0	0.0	0.0	0.0	0.0	0.0	0.0	19.0	0.0	0.0	22.0	0.0	22.0	0.0	0.0	0.0	0.0	19.0	0.0	0.0	0.0	0.0	8.0	0.0	0.0	0.0	16.0	0.0	0.0	30.0	0.0	0.0	0.0	0.0	14.0	0.0	0.0	0.0	0.0	0.0
e73868a4bd13666f0496144da20fe6f3	k__Bacteria; p__Firmicutes; c__Clostridia; o__Clostridiales; f__Lachnospiraceae; g__Dorea; s__	0.0	46.0	0.0	0.0	0.0	93.0	29.0	0.0	0.0	43.0	0.0	29.0	0.0	0.0	0.0	0.0	0.0	45.0	45.0	0.0	0.0	0.0	30.0	18.0	0.0	21.0	42.0	92.0	0.0	60.0	0.0	0.0	0.0	0.0	15.0	0.0	54.0	63.0	0.0	0.0	0.0	18.0	21.0	0.0	0.0	0.0	0.0	29.0
c0e2e83da333f9ace64f4500e615edc6	k__Bacteria; p__Firmicutes; c__Bacilli; o__Lactobacillales; f__Streptococcaceae; g__Streptococcus; s__	0.0	0.0	52.0	65.0	37.0	0.0	0.0	0.0	0.0	0.0	0.0	0.0	0.0	0.0	0.0	0.0	0.0	0.0	23.0	0.0	0.0	0.0	0.0	0.0	0.0	46.0	0.0	206.0	0.0	0.0	47.0	0.0	0.0	0.0	0.0	0.0	0.0	0.0	0.0	0.0	24.0	10.0	0.0	0.0	361.0	0.0	0.0	0.0
87714a2f0bf3b1faedeb84ccb91fa79d	k__Bacteria; p__Firmicutes; c__Clostridia; o__Clostridiales; f__Lachnospiraceae	0.0	0.0	0.0	0.0	0.0	19.0	0.0	0.0	0.0	0.0	0.0	0.0	0.0	0.0	0.0	0.0	0.0	45.0	0.0	61.0	0.0	0.0	0.0	0.0	0.0	0.0	53.0	0.0	0.0	0.0	0.0	0.0	0.0	0.0	0.0	59.0	139.0	0.0	78.0	0.0	0.0	0.0	0.0	0.0	0.0	0.0	0.0	63.0
3fdadbfe8bba0c81449e36562ec78a4a	k__Bacteria; p__Firmicutes; c__Clostridia; o__Clostridiales; f__Lachnospiraceae; g__Roseburia	0.0	0.0	0.0	0.0	0.0	36.0	183.0	0.0	0.0	0.0	0.0	0.0	0.0	43.0	0.0	112.0	30.0	270.0	0.0	35.0	0.0	0.0	0.0	51.0	0.0	0.0	36.0	53.0	33.0	19.0	0.0	0.0	0.0	45.0	48.0	31.0	0.0	0.0	0.0	0.0	43.0	0.0	22.0	0.0	29.0	27.0	0.0	43.0
97326d7b816608061929cb0e4e11cfbf	k__Bacteria; p__Firmicutes; c__Clostridia; o__Clostridiales; f__Ruminococcaceae	0.0	39.0	0.0	0.0	0.0	91.0	0.0	0.0	0.0	0.0	31.0	0.0	58.0	0.0	0.0	0.0	0.0	0.0	44.0	0.0	0.0	0.0	0.0	0.0	0.0	0.0	60.0	0.0	117.0	0.0	0.0	0.0	0.0	0.0	0.0	239.0	0.0	0.0	0.0	0.0	0.0	58.0	0.0	0.0	31.0	0.0	34.0	0.0
816dba8f2677bb525f70a2acb7a0ea39	k__Bacteria; p__Verrucomicrobia; c__Verrucomicrobiae; o__Verrucomicrobiales; f__Verrucomicrobiaceae; g__Akkermansia; s__muciniphila	19.0	383.0	0.0	0.0	0.0	0.0	0.0	0.0	311.0	0.0	378.0	290.0	46.0	0.0	0.0	0.0	0.0	0.0	0.0	0.0	0.0	0.0	0.0	81.0	232.0	0.0	174.0	0.0	25.0	35.0	0.0	0.0	40.0	0.0	0.0	120.0	0.0	0.0	0.0	0.0	0.0	0.0	0.0	0.0	0.0	0.0	0.0	0.0
1c1475f2c6b27ba8026dd22ccd59708c	k__Bacteria; p__Bacteroidetes; c__Bacteroidia; o__Bacteroidales; f__Bacteroidaceae; g__Bacteroides; s__ovatus	25.0	0.0	0.0	0.0	0.0	0.0	59.0	0.0	26.0	0.0	0.0	82.0	0.0	0.0	12.0	12.0	0.0	0.0	0.0	0.0	55.0	0.0	0.0	35.0	0.0	0.0	0.0	0.0	0.0	0.0	21.0	0.0	0.0	196.0	0.0	51.0	0.0	87.0	0.0	62.0	238.0	0.0	0.0	0.0	0.0	57.0	53.0	59.0
d33cc3c697df5bd9e1acec6e4f067b81	k__Bacteria; p__Proteobacteria; c__Gammaproteobacteria; o__Pasteurellales; f__Pasteurellaceae; g__Haemophilus; s__parainfluenzae	0.0	0.0	0.0	0.0	0.0	0.0	0.0	24.0	55.0	0.0	0.0	0.0	0.0	0.0	63.0	0.0	0.0	0.0	0.0	0.0	0.0	0.0	0.0	0.0	0.0	0.0	0.0	0.0	0.0	0.0	0.0	17.0	0.0	0.0	0.0	0.0	20.0	0.0	0.0	0.0	0.0	0.0	0.0	0.0	31.0	0.0	0.0	17.0
3a61ac710e866fdad85a306bd3636780	k__Bacteria; p__Bacteroidetes; c__Bacteroidia; o__Bacteroidales; f__Bacteroidaceae; g__Bacteroides; s__	31.0	49.0	0.0	0.0	0.0	58.0	0.0	0.0	18.0	0.0	0.0	0.0	0.0	0.0	0.0	117.0	36.0	0.0	75.0	0.0	0.0	39.0	0.0	0.0	0.0	0.0	0.0	0.0	219.0	0.0	1327.0	69.0	25.0	0.0	27.0	0.0	409.0	0.0	29.0	0.0	0.0	0.0	427.0	22.0	50.0	132.0	45.0	1969.0
cc93cce6a8980f71e2caad848a2a702a	k__Bacteria; p__Bacteroidetes; c__Bacteroidia; o__Bacteroidales; f__Bacteroidaceae; g__Bacteroides; s__	81.0	309.0	5.0	0.0	16.0	899.0	44.0	0.0	392.0	14.0	0.0	339.0	36.0	53.0	43.0	32.0	128.0	15.0	121.0	77.0	885.0	250.0	371.0	1067.0	0.0	849.0	569.0	433.0	65.0	49.0	1356.0	133.0	147.0	279.0	1715.0	257.0	288.0	474.0	277.0	736.0	252.0	287.0	390.0	289.0	1014.0	51.0	124.0	370.0
c560ccbba0548b0c4a15ea98cb9b59d3	k__Bacteria; p__Proteobacteria; c__Betaproteobacteria; o__Burkholderiales; f__Alcaligenaceae; g__Sutterella; s__	0.0	0.0	0.0	0.0	0.0	0.0	0.0	24.0	0.0	0.0	0.0	0.0	0.0	0.0	0.0	0.0	0.0	0.0	0.0	52.0	7.0	0.0	0.0	0.0	123.0	0.0	0.0	0.0	0.0	0.0	139.0	0.0	0.0	0.0	0.0	0.0	19.0	0.0	0.0	40.0	0.0	0.0	0.0	22.0	0.0	70.0	0.0	0.0
802a27e89aaea3d514a07a609c735bfd	k__Bacteria; p__Firmicutes; c__Bacilli; o__Lactobacillales; f__Streptococcaceae; g__Streptococcus; s__	0.0	0.0	0.0	0.0	0.0	0.0	0.0	29.0	0.0	0.0	0.0	0.0	0.0	0.0	0.0	0.0	0.0	0.0	0.0	0.0	0.0	0.0	0.0	0.0	0.0	37.0	0.0	0.0	0.0	0.0	0.0	27.0	0.0	0.0	0.0	0.0	0.0	53.0	0.0	0.0	33.0	0.0	19.0	0.0	0.0	0.0	0.0	9.0
77f763ac27496f863f6aa29228ca004c	k__Bacteria; p__Firmicutes; c__Clostridia; o__Clostridiales; f__Clostridiaceae; g__; s__	0.0	39.0	0.0	0.0	0.0	35.0	0.0	0.0	0.0	0.0	0.0	0.0	0.0	27.0	0.0	0.0	0.0	0.0	0.0	0.0	0.0	0.0	0.0	48.0	0.0	0.0	35.0	0.0	0.0	0.0	0.0	0.0	0.0	0.0	21.0	0.0	42.0	26.0	0.0	0.0	0.0	0.0	0.0	0.0	0.0	0.0	0.0	0.0
1d6646270d2d2bf51114e9a2b6c50115	k__Bacteria; p__Bacteroidetes; c__Bacteroidia; o__Bacteroidales; f__[Paraprevotellaceae]; g__Paraprevotella; s__	0.0	0.0	0.0	0.0	0.0	39.0	0.0	23.0	0.0	17.0	0.0	0.0	0.0	0.0	0.0	0.0	35.0	0.0	0.0	0.0	0.0	0.0	0.0	0.0	0.0	0.0	0.0	0.0	112.0	0.0	0.0	22.0	0.0	0.0	0.0	0.0	0.0	0.0	0.0	0.0	9.0	0.0	0.0	0.0	0.0	0.0	0.0	0.0
247ba1f5b6938f234d3ef590ce4f9457	k__Bacteria; p__Bacteroidetes; c__Bacteroidia; o__Bacteroidales; f__Rikenellaceae	0.0	0.0	0.0	0.0	0.0	0.0	0.0	0.0	0.0	28.0	0.0	56.0	0.0	0.0	42.0	0.0	14.0	0.0	0.0	0.0	0.0	0.0	0.0	0.0	49.0	21.0	24.0	0.0	0.0	0.0	0.0	0.0	33.0	0.0	0.0	0.0	49.0	0.0	0.0	0.0	0.0	54.0	28.0	40.0	0.0	40.0	0.0	32.0
352342b90e6a443dc46d332d9c1b6723	k__Bacteria; p__Firmicutes; c__Clostridia; o__Clostridiales; f__Lachnospiraceae	0.0	0.0	0.0	0.0	0.0	0.0	0.0	0.0	0.0	0.0	0.0	29.0	0.0	0.0	0.0	0.0	0.0	0.0	0.0	0.0	0.0	0.0	40.0	0.0	0.0	0.0	45.0	0.0	0.0	0.0	27.0	0.0	0.0	0.0	0.0	0.0	0.0	0.0	0.0	0.0	0.0	0.0	0.0	0.0	0.0	0.0	0.0	0.0
c6acce44bd7c7633c3973ad248f4d948	k__Bacteria; p__Bacteroidetes; c__Bacteroidia; o__Bacteroidales; f__Bacteroidaceae; g__Bacteroides; s__uniformis	13.0	72.0	0.0	100.0	1203.0	0.0	18.0	15.0	267.0	271.0	123.0	0.0	0.0	0.0	65.0	80.0	235.0	70.0	0.0	138.0	116.0	64.0	0.0	277.0	393.0	536.0	41.0	0.0	156.0	414.0	0.0	0.0	47.0	82.0	0.0	312.0	360.0	72.0	0.0	255.0	0.0	204.0	178.0	31.0	224.0	0.0	75.0	173.0
56c23b83102507698c39d7fbff9e4ec4	k__Bacteria; p__Firmicutes; c__Clostridia; o__Clostridiales; f__Ruminococcaceae; g__; s__	0.0	54.0	0.0	0.0	0.0	66.0	0.0	0.0	0.0	0.0	0.0	0.0	26.0	0.0	0.0	0.0	0.0	0.0	0.0	0.0	0.0	0.0	0.0	0.0	0.0	0.0	28.0	0.0	0.0	0.0	0.0	0.0	0.0	0.0	0.0	0.0	0.0	0.0	0.0	0.0	0.0	27.0	0.0	0.0	0.0	0.0	0.0	0.0
f001036d409cd326ac7c88409ae02760	k__Bacteria; p__Firmicutes; c__Clostridia; o__Clostridiales; f__Ruminococcaceae; g__Oscillospira; s__	0.0	21.0	0.0	0.0	0.0	0.0	0.0	0.0	0.0	0.0	50.0	0.0	0.0	0.0	0.0	0.0	0.0	0.0	0.0	0.0	0.0	0.0	0.0	0.0	0.0	0.0	33.0	0.0	37.0	0.0	0.0	0.0	0.0	0.0	0.0	0.0	0.0	116.0	0.0	0.0	0.0	242.0	53.0	23.0	0.0	91.0	0.0	0.0
3845ac988dc2441fa706291caee46d57	k__Bacteria; p__Bacteroidetes; c__Bacteroidia; o__Bacteroidales; f__Prevotellaceae; g__Prevotella; s__	52.0	0.0	0.0	0.0	0.0	0.0	32.0	0.0	0.0	0.0	0.0	0.0	24.0	23.0	0.0	0.0	27.0	0.0	0.0	0.0	0.0	0.0	0.0	0.0	0.0	0.0	0.0	0.0	0.0	0.0	0.0	0.0	0.0	0.0	327.0	19.0	0.0	0.0	182.0	0.0	0.0	0.0	41.0	27.0	0.0	0.0	0.0	85.0
3a0744592ad4fca73d197202066cdbdb	k__Bacteria; p__Firmicutes; c__Clostridia; o__Clostridiales; f__Ruminococcaceae; g__Faecalibacterium; s__prausnitzii	0.0	35.0	0.0	0.0	0.0	60.0	0.0	46.0	0.0	19.0	0.0	72.0	0.0	0.0	24.0	0.0	0.0	21.0	0.0	31.0	0.0	0.0	90.0	0.0	0.0	0.0	0.0	0.0	28.0	0.0	54.0	0.0	0.0	0.0	114.0	33.0	0.0	0.0	0.0	68.0	0.0	59.0	0.0	55.0	62.0	0.0	20.0	0.0
858c7c992af0d58109776b61a2ad6efb	k__Bacteria; p__Firmicutes; c__Clostridia; o__Clostridiales; f__Ruminococcaceae	0.0	0.0	0.0	0.0	104.0	0.0	0.0	0.0	0.0	41.0	0.0	0.0	0.0	0.0	0.0	0.0	0.0	0.0	0.0	0.0	0.0	0.0	0.0	0.0	7.0	0.0	0.0	0.0	0.0	0.0	0.0	0.0	0.0	0.0	0.0	0.0	32.0	44.0	0.0	0.0	23.0	112.0	0.0	0.0	0.0	0.0	0.0	15.0
82cbb69c6eb54cccce41c404b6fb8180	k__Bacteria; p__Bacteroidetes; c__Bacteroidia; o__Bacteroidales; f__Bacteroidaceae; g__Bacteroides; s__	0.0	26.0	0.0	0.0	0.0	90.0	0.0	0.0	59.0	0.0	0.0	0.0	0.0	0.0	25.0	0.0	0.0	0.0	145.0	0.0	0.0	0.0	0.0	0.0	0.0	0.0	0.0	0.0	0.0	0.0	0.0	0.0	0.0	0.0	0.0	0.0	0.0	0.0	0.0	0.0	0.0	0.0	0.0	0.0	0.0	0.0	0.0	0.0
a6de95a7cc3077504d9cfd058f56ce2f	k__Bacteria; p__Firmicutes; c__Clostridia; o__Clostridiales; f__[Mogibacteriaceae]; g__; s__	0.0	0.0	0.0	0.0	0.0	0.0	0.0	0.0	0.0	18.0	0.0	0.0	0.0	0.0	0.0	0.0	0.0	0.0	0.0	0.0	0.0	0.0	0.0	0.0	0.0	0.0	0.0	0.0	0.0	0.0	37.0	0.0	0.0	0.0	15.0	0.0	0.0	45.0	0.0	0.0	0.0	0.0	0.0	0.0	0.0	0.0	0.0	0.0
804a495727a15d8d729804ddb3d7ea93	k__Bacteria; p__Firmicutes; c__Clostridia; o__Clostridiales; f__Lachnospiraceae; g__Coprococcus; s__	0.0	44.0	57.0	0.0	15.0	37.0	9.0	42.0	15.0	71.0	0.0	20.0	4.0	0.0	0.0	24.0	9.0	0.0	0.0	0.0	20.0	0.0	0.0	12.0	6.0	18.0	0.0	0.0	0.0	12.0	24.0	0.0	0.0	0.0	21.0	36.0	33.0	27.0	19.0	0.0	0.0	8.0	0.0	0.0	0.0	0.0	0.0	13.0
fac3d64b3ac3eb2359a6c4d9f5eeea1f	k__Bacteria; p__Actinobacteria; c__Actinobacteria; o__Bifidobacteriales; f__Bifidobacteriaceae; g__Bifidobacterium; s__adolescentis	0.0	81.0	0.0	0.0	137.0	0.0	35.0	0.0	40.0	0.0	61.0	33.0	28.0	33.0	67.0	0.0	44.0	0.0	28.0	0.0	0.0	0.0	0.0	0.0	86.0	56.0	0.0	0.0	61.0	0.0	0.0	0.0	36.0	0.0	45.0	0.0	65.0	59.0	30.0	0.0	59.0	0.0	0.0	28.0	0.0	71.0	0.0	0.0
30e3607cb2cdc0da668f4022de997604	k__Bacteria; p__Bacteroidetes; c__Bacteroidia; o__Bacteroidales; f__Bacteroidaceae; g__Bacteroides; s__	0.0	26.0	0.0	0.0	0.0	0.0	0.0	0.0	0.0	0.0	0.0	0.0	0.0	0.0	0.0	20.0	28.0	0.0	0.0	0.0	0.0	0.0	0.0	0.0	0.0	0.0	0.0	0.0	0.0	0.0	0.0	12.0	0.0	0.0	0.0	50.0	507.0	0.0	0.0	119.0	0.0	0.0	0.0	24.0	0.0	0.0	0.0	0.0
770aecc832301aa62cd9640b4579c96a	k__Bacteria; p__Bacteroidetes; c__Bacteroidia; o__Bacteroidales; f__Bacteroidaceae; g__Bacteroides; s__eggerthii	0.0	0.0	0.0	0.0	40.0	0.0	0.0	0.0	0.0	15.0	0.0	0.0	0.0	0.0	0.0	39.0	216.0	0.0	0.0	0.0	0.0	0.0	630.0	0.0	0.0	0.0	0.0	0.0	31.0	0.0	0.0	258.0	0.0	0.0	2622.0	0.0	0.0	0.0	0.0	0.0	0.0	0.0	0.0	1147.0	0.0	0.0	0.0	0.0
11b516d0f10d6419f036c955be2c6438	k__Bacteria; p__Proteobacteria; c__Deltaproteobacteria; o__Desulfovibrionales; f__Desulfovibrionaceae; g__Bilophila; s__	0.0	0.0	0.0	0.0	0.0	0.0	0.0	0.0	0.0	59.0	0.0	0.0	0.0	0.0	0.0	0.0	31.0	0.0	0.0	0.0	46.0	0.0	0.0	0.0	39.0	0.0	0.0	0.0	0.0	0.0	0.0	0.0	0.0	0.0	0.0	24.0	0.0	0.0	0.0	0.0	0.0	0.0	0.0	0.0	0.0	0.0	0.0	0.0
42ca42c6d02909903f984a6301901cc3	k__Bacteria; p__Firmicutes; c__Clostridia; o__Clostridiales; f__; g__; s__	0.0	0.0	0.0	0.0	0.0	0.0	0.0	0.0	0.0	0.0	0.0	0.0	0.0	0.0	0.0	27.0	0.0	0.0	0.0	0.0	0.0	0.0	40.0	0.0	0.0	0.0	0.0	0.0	0.0	0.0	0.0	0.0	0.0	0.0	0.0	66.0	17.0	35.0	0.0	0.0	0.0	0.0	0.0	0.0	0.0	0.0	0.0	0.0
553ccbd6b4ef2718c0a223cc745fa050	k__Bacteria; p__Firmicutes; c__Clostridia; o__Clostridiales; f__Lachnospiraceae	0.0	0.0	0.0	0.0	0.0	0.0	0.0	0.0	0.0	0.0	0.0	0.0	0.0	0.0	17.0	0.0	0.0	0.0	30.0	0.0	0.0	0.0	0.0	57.0	0.0	0.0	0.0	0.0	12.0	0.0	0.0	0.0	0.0	0.0	41.0	0.0	0.0	47.0	0.0	0.0	0.0	0.0	37.0	0.0	0.0	0.0	0.0	45.0
a47979bb462a16e380235a0d7f79fb5c	k__Bacteria; p__Bacteroidetes; c__Bacteroidia; o__Bacteroidales; f__Porphyromonadaceae; g__Parabacteroides; s__	0.0	0.0	0.0	0.0	0.0	0.0	0.0	0.0	0.0	0.0	0.0	89.0	0.0	0.0	0.0	28.0	0.0	0.0	0.0	0.0	0.0	0.0	0.0	52.0	0.0	0.0	0.0	0.0	0.0	0.0	0.0	30.0	0.0	76.0	35.0	0.0	40.0	170.0	0.0	0.0	0.0	0.0	23.0	0.0	0.0	0.0	0.0	0.0
c9ae44e29f34b6dbd2acad75f18a386c	k__Bacteria; p__Cyanobacteria; c__4C0d-2; o__YS2; f__; g__; s__	0.0	31.0	0.0	0.0	0.0	0.0	0.0	0.0	0.0	0.0	0.0	37.0	0.0	0.0	0.0	0.0	0.0	0.0	0.0	58.0	0.0	0.0	0.0	0.0	0.0	0.0	0.0	0.0	0.0	0.0	0.0	0.0	0.0	0.0	81.0	48.0	28.0	0.0	0.0	0.0	0.0	0.0	0.0	0.0	0.0	0.0	0.0	0.0
0d7b8ad1b4f2e6c9cdfd33985c2ced11	k__Bacteria; p__Bacteroidetes; c__Bacteroidia; o__Bacteroidales; f__Rikenellaceae; g__; s__	0.0	17.0	0.0	0.0	0.0	0.0	0.0	0.0	0.0	0.0	0.0	0.0	0.0	0.0	0.0	0.0	0.0	63.0	0.0	0.0	0.0	0.0	0.0	0.0	0.0	0.0	0.0	0.0	0.0	0.0	0.0	0.0	0.0	0.0	0.0	0.0	0.0	56.0	0.0	0.0	0.0	38.0	0.0	0.0	35.0	0.0	0.0	0.0
6b374cb16252257671263fc319b2fada	k__Bacteria; p__Bacteroidetes; c__Bacteroidia; o__Bacteroidales; f__Prevotellaceae; g__Prevotella; s__	42.0	0.0	0.0	0.0	0.0	0.0	52.0	0.0	0.0	0.0	0.0	0.0	18.0	10.0	0.0	0.0	16.0	0.0	0.0	0.0	0.0	0.0	0.0	0.0	0.0	0.0	0.0	0.0	0.0	0.0	0.0	0.0	0.0	0.0	343.0	16.0	0.0	0.0	180.0	0.0	0.0	0.0	57.0	23.0	0.0	0.0	0.0	72.0
cb02ef54ef70bde2c34ea369aa774aa7	k__Bacteria; p__Firmicutes; c__Clostridia; o__Clostridiales; f__Lachnospiraceae; g__Blautia; s__	36.0	0.0	0.0	0.0	0.0	0.0	0.0	47.0	0.0	0.0	0.0	75.0	0.0	0.0	0.0	0.0	0.0	0.0	41.0	0.0	0.0	0.0	0.0	0.0	0.0	0.0	0.0	0.0	36.0	0.0	0.0	0.0	0.0	0.0	126.0	0.0	33.0	0.0	0.0	0.0	0.0	0.0	0.0	0.0	0.0	0.0	0.0	48.0
60e17e35e0e21e73776144762a3a5994	k__Bacteria; p__Firmicutes; c__Clostridia; o__Clostridiales; f__Ruminococcaceae	0.0	0.0	0.0	0.0	0.0	0.0	0.0	0.0	0.0	0.0	0.0	0.0	0.0	0.0	0.0	0.0	0.0	0.0	0.0	0.0	0.0	0.0	0.0	0.0	0.0	0.0	0.0	0.0	0.0	0.0	0.0	0.0	0.0	48.0	54.0	0.0	0.0	0.0	0.0	0.0	0.0	0.0	0.0	0.0	0.0	0.0	0.0	0.0
a6e63ee18b9dc8e1b0b66ac27e9fc4ee	k__Bacteria; p__Firmicutes; c__Clostridia; o__Clostridiales; f__Lachnospiraceae; g__[Ruminococcus]; s__	0.0	42.0	0.0	0.0	0.0	0.0	0.0	13.0	0.0	47.0	0.0	0.0	46.0	54.0	0.0	17.0	87.0	43.0	0.0	0.0	0.0	56.0	0.0	110.0	34.0	0.0	0.0	41.0	0.0	36.0	0.0	0.0	77.0	0.0	170.0	39.0	73.0	62.0	34.0	0.0	0.0	0.0	0.0	0.0	0.0	0.0	21.0	114.0
b09cd86d5451336071244788fc664534	k__Bacteria; p__Bacteroidetes; c__Bacteroidia; o__Bacteroidales; f__Bacteroidaceae; g__Bacteroides; s__	17.0	33.0	0.0	0.0	0.0	35.0	0.0	0.0	23.0	0.0	0.0	0.0	0.0	0.0	0.0	123.0	41.0	0.0	74.0	0.0	0.0	33.0	0.0	0.0	0.0	0.0	0.0	0.0	250.0	0.0	1570.0	103.0	48.0	0.0	36.0	0.0	452.0	0.0	0.0	0.0	0.0	0.0	445.0	62.0	64.0	137.0	0.0	2362.0
6ff3735a4cbf851f16082fbce345d713	k__Bacteria; p__Proteobacteria; c__Betaproteobacteria; o__Burkholderiales; f__Alcaligenaceae; g__Sutterella; s__	0.0	0.0	0.0	0.0	0.0	0.0	0.0	35.0	0.0	0.0	0.0	0.0	0.0	0.0	0.0	0.0	0.0	0.0	0.0	35.0	1.0	0.0	0.0	0.0	114.0	0.0	0.0	0.0	0.0	0.0	132.0	0.0	0.0	0.0	0.0	0.0	45.0	0.0	0.0	0.0	0.0	0.0	0.0	16.0	0.0	52.0	0.0	0.0
90cf9f051fa436013c1f0bb57594e17a	k__Bacteria; p__Firmicutes; c__Clostridia; o__Clostridiales; f__Lachnospiraceae; g__Coprococcus; s__	0.0	0.0	0.0	0.0	0.0	0.0	0.0	0.0	0.0	0.0	0.0	0.0	0.0	0.0	0.0	0.0	0.0	0.0	0.0	0.0	0.0	0.0	0.0	0.0	0.0	0.0	0.0	0.0	0.0	0.0	42.0	0.0	0.0	0.0	0.0	8.0	0.0	30.0	0.0	0.0	0.0	0.0	0.0	0.0	0.0	0.0	0.0	0.0
0f2314ebb8b8d4aedebdcc10c8613ea5	k__Bacteria; p__Actinobacteria; c__Actinobacteria; o__Bifidobacteriales; f__Bifidobacteriaceae; g__Bifidobacterium; s__longum	0.0	0.0	0.0	0.0	0.0	0.0	0.0	0.0	0.0	0.0	0.0	2.0	0.0	0.0	8.0	0.0	0.0	0.0	0.0	0.0	0.0	0.0	0.0	0.0	1.0	0.0	0.0	0.0	0.0	0.0	0.0	0.0	0.0	0.0	0.0	0.0	0.0	0.0	0.0	0.0	3.0	0.0	0.0	0.0	0.0	0.0	0.0	0.0
84ae803a0d7aaf7f6d59f8286c22c863	k__Bacteria; p__Firmicutes; c__Clostridia; o__Clostridiales; f__Ruminococcaceae; g__Ruminococcus; s__	0.0	0.0	0.0	0.0	0.0	0.0	0.0	0.0	0.0	0.0	0.0	0.0	11.0	0.0	0.0	0.0	0.0	0.0	0.0	0.0	0.0	0.0	0.0	0.0	47.0	0.0	0.0	0.0	0.0	0.0	0.0	0.0	0.0	0.0	0.0	0.0	0.0	61.0	0.0	0.0	0.0	26.0	0.0	0.0	0.0	0.0	0.0	0.0
5a191cd8938ffd9c64eb3dc621d3c0e8	k__Bacteria; p__Firmicutes; c__Clostridia; o__Clostridiales; f__Ruminococcaceae; g__Oscillospira; s__	0.0	0.0	0.0	0.0	28.0	0.0	0.0	0.0	0.0	0.0	0.0	0.0	0.0	0.0	0.0	0.0	0.0	0.0	0.0	0.0	0.0	0.0	0.0	0.0	0.0	0.0	0.0	0.0	0.0	0.0	33.0	0.0	0.0	0.0	0.0	0.0	23.0	0.0	0.0	0.0	0.0	18.0	0.0	0.0	0.0	0.0	0.0	0.0
4daf2d4d0efa81dda4c14ae1a456955c	k__Bacteria; p__Firmicutes; c__Clostridia; o__Clostridiales; f__Ruminococcaceae; g__Oscillospira; s__	0.0	16.0	0.0	0.0	0.0	0.0	0.0	0.0	0.0	43.0	0.0	7.0	0.0	13.0	12.0	23.0	0.0	0.0	0.0	0.0	0.0	0.0	0.0	0.0	0.0	0.0	0.0	22.0	0.0	0.0	0.0	0.0	0.0	0.0	64.0	68.0	17.0	19.0	0.0	0.0	0.0	0.0	0.0	0.0	0.0	0.0	24.0	3.0
971b69525fcf4f1d69416b5533edaeca	k__Bacteria; p__Firmicutes; c__Clostridia; o__Clostridiales; f__Lachnospiraceae	0.0	40.0	0.0	64.0	0.0	0.0	79.0	0.0	0.0	0.0	0.0	64.0	0.0	122.0	0.0	0.0	0.0	0.0	0.0	0.0	0.0	0.0	48.0	0.0	43.0	91.0	48.0	66.0	37.0	0.0	63.0	21.0	0.0	0.0	90.0	42.0	29.0	30.0	0.0	0.0	0.0	0.0	0.0	0.0	0.0	0.0	0.0	0.0
c157f0b0e8d7eeb0b987a33a8dd709d4	k__Bacteria; p__Bacteroidetes; c__Bacteroidia; o__Bacteroidales; f__Bacteroidaceae; g__Bacteroides; s__	29.0	0.0	0.0	0.0	0.0	0.0	15.0	0.0	0.0	0.0	0.0	0.0	16.0	28.0	0.0	0.0	0.0	0.0	23.0	32.0	0.0	0.0	101.0	0.0	0.0	0.0	24.0	0.0	0.0	0.0	0.0	0.0	0.0	0.0	0.0	44.0	0.0	0.0	53.0	0.0	0.0	0.0	0.0	61.0	0.0	0.0	0.0	106.0
2d2f6663015d8dbcf1c82e7c3e0fbde8	k__Bacteria; p__Bacteroidetes; c__Bacteroidia; o__Bacteroidales; f__Prevotellaceae; g__Prevotella; s__copri	0.0	0.0	0.0	0.0	0.0	0.0	0.0	0.0	0.0	0.0	0.0	0.0	28.0	309.0	0.0	0.0	0.0	332.0	0.0	0.0	0.0	0.0	0.0	0.0	0.0	0.0	685.0	0.0	11.0	0.0	0.0	0.0	0.0	0.0	0.0	0.0	0.0	0.0	0.0	0.0	0.0	0.0	0.0	0.0	0.0	0.0	126.0	0.0
fab3bac2c8ced9c61e2cac70ba3a0724	k__Bacteria; p__Bacteroidetes; c__Bacteroidia; o__Bacteroidales; f__Porphyromonadaceae; g__Parabacteroides; s__distasonis	0.0	0.0	0.0	0.0	0.0	0.0	0.0	0.0	0.0	0.0	0.0	0.0	0.0	0.0	0.0	0.0	0.0	0.0	0.0	0.0	0.0	0.0	0.0	0.0	0.0	0.0	0.0	0.0	0.0	0.0	0.0	0.0	0.0	0.0	0.0	0.0	0.0	0.0	0.0	0.0	0.0	0.0	90.0	0.0	0.0	0.0	0.0	0.0
8c61e763ea8c6105a16333efa6bdd5d7	k__Bacteria; p__Firmicutes; c__Clostridia; o__Clostridiales; f__Ruminococcaceae; g__Oscillospira; s__	19.0	17.0	0.0	0.0	0.0	25.0	0.0	0.0	0.0	0.0	8.0	51.0	0.0	53.0	99.0	68.0	123.0	37.0	0.0	51.0	0.0	0.0	0.0	35.0	0.0	165.0	48.0	0.0	32.0	36.0	57.0	0.0	0.0	27.0	224.0	60.0	0.0	0.0	43.0	38.0	0.0	60.0	125.0	63.0	56.0	0.0	50.0	95.0
98a01e910c22eadce77d096196995e42	k__Bacteria; p__Bacteroidetes; c__Bacteroidia; o__Bacteroidales; f__[Odoribacteraceae]; g__Butyricimonas; s__	0.0	0.0	0.0	0.0	0.0	0.0	0.0	12.0	0.0	0.0	0.0	19.0	0.0	0.0	0.0	0.0	0.0	0.0	0.0	0.0	0.0	0.0	39.0	0.0	0.0	0.0	0.0	0.0	0.0	0.0	0.0	0.0	0.0	0.0	0.0	0.0	4.0	22.0	0.0	0.0	0.0	0.0	0.0	0.0	0.0	0.0	0.0	0.0
5c42b1b2a53b2000715eab4f7aa001d1	k__Bacteria; p__Firmicutes; c__Clostridia; o__Clostridiales; f__Lachnospiraceae; g__Dorea; s__longicatena	0.0	33.0	0.0	16.0	0.0	0.0	67.0	23.0	0.0	44.0	0.0	0.0	51.0	14.0	0.0	26.0	0.0	14.0	27.0	0.0	30.0	36.0	0.0	32.0	17.0	0.0	53.0	28.0	25.0	39.0	24.0	0.0	0.0	0.0	38.0	0.0	23.0	34.0	0.0	0.0	0.0	50.0	11.0	0.0	0.0	11.0	18.0	63.0
7e3bb103d208421134b754eba5df1d9d	k__Bacteria; p__Firmicutes; c__Clostridia; o__Clostridiales; f__Ruminococcaceae; g__Ruminococcus; s__	0.0	0.0	0.0	0.0	0.0	0.0	9.0	0.0	0.0	0.0	0.0	0.0	0.0	0.0	0.0	0.0	0.0	0.0	0.0	0.0	0.0	0.0	0.0	0.0	0.0	0.0	0.0	0.0	0.0	0.0	0.0	0.0	0.0	0.0	15.0	0.0	0.0	0.0	0.0	0.0	0.0	0.0	0.0	0.0	14.0	0.0	0.0	0.0
4a04ce4dc0aa533d859a292646aaec06	k__Bacteria; p__Firmicutes; c__Erysipelotrichi; o__Erysipelotrichales; f__Erysipelotrichaceae; g__Catenibacterium; s__	0.0	0.0	0.0	0.0	0.0	0.0	0.0	0.0	0.0	0.0	20.0	0.0	0.0	12.0	0.0	0.0	0.0	0.0	0.0	0.0	0.0	0.0	0.0	0.0	0.0	0.0	0.0	0.0	0.0	0.0	0.0	60.0	60.0	0.0	0.0	0.0	0.0	0.0	0.0	0.0	0.0	0.0	0.0	254.0	0.0	0.0	76.0	0.0
9252c32ec68731b8cef6d91ec1e725aa	k__Bacteria; p__Firmicutes; c__Clostridia; o__Clostridiales; f__Lachnospiraceae	0.0	0.0	0.0	0.0	0.0	0.0	0.0	0.0	0.0	0.0	0.0	24.0	0.0	31.0	0.0	0.0	0.0	0.0	0.0	0.0	0.0	0.0	0.0	0.0	0.0	0.0	0.0	0.0	0.0	0.0	11.0	0.0	0.0	0.0	26.0	9.0	0.0	0.0	0.0	0.0	0.0	0.0	0.0	0.0	0.0	0.0	0.0	0.0
909fd755d3f000f2ea28ec63a499adbc	k__Bacteria; p__Firmicutes; c__Clostridia; o__Clostridiales; f__Lachnospiraceae; g__[Ruminococcus]; s__gnavus	0.0	0.0	169.0	27.0	15.0	0.0	33.0	0.0	0.0	0.0	0.0	0.0	0.0	0.0	0.0	0.0	0.0	0.0	28.0	0.0	35.0	0.0	33.0	0.0	16.0	0.0	0.0	0.0	0.0	0.0	0.0	0.0	0.0	0.0	0.0	0.0	0.0	0.0	0.0	0.0	154.0	0.0	0.0	0.0	0.0	0.0	0.0	0.0
c20e308d66322c08a6d3c44c09da52a6	k__Bacteria; p__Firmicutes; c__Clostridia; o__Clostridiales; f__Lachnospiraceae	0.0	0.0	0.0	0.0	0.0	86.0	0.0	0.0	0.0	0.0	0.0	0.0	0.0	0.0	0.0	0.0	0.0	43.0	0.0	36.0	0.0	0.0	21.0	0.0	0.0	33.0	101.0	0.0	0.0	0.0	73.0	0.0	0.0	0.0	0.0	0.0	0.0	0.0	0.0	63.0	0.0	0.0	0.0	0.0	89.0	0.0	67.0	43.0
aa7c186f44d0fcdd576a8401c47982af	k__Bacteria; p__Firmicutes; c__Clostridia; o__Clostridiales; f__Lachnospiraceae	0.0	0.0	0.0	0.0	0.0	42.0	0.0	27.0	0.0	0.0	0.0	33.0	0.0	6.0	0.0	24.0	0.0	0.0	0.0	56.0	0.0	0.0	0.0	0.0	0.0	32.0	0.0	0.0	0.0	0.0	34.0	0.0	0.0	0.0	58.0	24.0	31.0	0.0	0.0	0.0	0.0	31.0	57.0	0.0	0.0	0.0	0.0	0.0
272b39f0b42aec97cf200e49fea5ecd4	k__Bacteria; p__Firmicutes; c__Clostridia; o__Clostridiales; f__Veillonellaceae; g__Veillonella; s__parvula	0.0	0.0	0.0	0.0	0.0	0.0	22.0	0.0	41.0	0.0	0.0	0.0	0.0	0.0	0.0	0.0	0.0	0.0	0.0	0.0	0.0	0.0	0.0	0.0	0.0	0.0	0.0	0.0	0.0	0.0	0.0	0.0	0.0	0.0	0.0	0.0	0.0	0.0	0.0	0.0	0.0	0.0	0.0	0.0	45.0	0.0	0.0	28.0
9bff84657790a3af531499a91e1a8405	k__Bacteria; p__Actinobacteria; c__Actinobacteria; o__Bifidobacteriales; f__Bifidobacteriaceae; g__Bifidobacterium; s__longum	0.0	25.0	0.0	0.0	0.0	0.0	0.0	0.0	0.0	0.0	0.0	1.0	0.0	0.0	0.0	0.0	0.0	0.0	0.0	0.0	0.0	0.0	0.0	0.0	0.0	0.0	0.0	0.0	17.0	0.0	0.0	0.0	0.0	0.0	0.0	0.0	0.0	0.0	0.0	0.0	1.0	0.0	0.0	0.0	0.0	0.0	0.0	0.0
8d6b057dce2a559fdbbff15cd197c73d	k__Bacteria; p__Firmicutes; c__Clostridia; o__Clostridiales; f__Lachnospiraceae	0.0	0.0	0.0	0.0	0.0	0.0	0.0	0.0	0.0	0.0	0.0	0.0	0.0	0.0	0.0	0.0	0.0	0.0	0.0	0.0	0.0	0.0	0.0	0.0	0.0	0.0	0.0	0.0	0.0	0.0	0.0	0.0	0.0	0.0	38.0	0.0	0.0	0.0	27.0	0.0	0.0	22.0	0.0	0.0	19.0	0.0	0.0	0.0
625a636ed8593d8ae3e68573a4e2afc5	k__Bacteria; p__Firmicutes; c__Clostridia; o__Clostridiales; f__Ruminococcaceae; g__Ruminococcus; s__	31.0	0.0	0.0	0.0	29.0	13.0	0.0	0.0	32.0	0.0	0.0	0.0	33.0	0.0	0.0	64.0	0.0	0.0	70.0	52.0	0.0	0.0	0.0	0.0	0.0	175.0	0.0	0.0	0.0	42.0	0.0	0.0	0.0	0.0	0.0	1546.0	0.0	0.0	0.0	119.0	0.0	0.0	53.0	0.0	0.0	0.0	0.0	0.0
1f4d0a38f4524a7b10321d94dee14f23	k__Bacteria; p__Firmicutes; c__Clostridia; o__Clostridiales; f__Lachnospiraceae; g__Coprococcus; s__	0.0	0.0	65.0	0.0	13.0	49.0	28.0	0.0	29.0	78.0	0.0	73.0	13.0	23.0	0.0	15.0	55.0	0.0	28.0	37.0	48.0	74.0	51.0	52.0	80.0	28.0	34.0	27.0	48.0	61.0	43.0	0.0	0.0	0.0	108.0	81.0	0.0	69.0	60.0	47.0	67.0	54.0	25.0	25.0	64.0	78.0	0.0	41.0
967cb95b18310afd01121e40d13ef355	k__Bacteria; p__Firmicutes; c__Clostridia; o__Clostridiales; f__Lachnospiraceae; g__Coprococcus; s__catus	0.0	88.0	0.0	0.0	0.0	52.0	46.0	25.0	0.0	0.0	0.0	40.0	68.0	50.0	0.0	0.0	42.0	41.0	38.0	0.0	0.0	0.0	55.0	66.0	41.0	0.0	0.0	0.0	62.0	0.0	47.0	0.0	0.0	0.0	50.0	0.0	37.0	0.0	44.0	0.0	0.0	38.0	0.0	0.0	0.0	0.0	0.0	58.0
c252542732944f77a80b9923eb1e86f9	k__Bacteria; p__Bacteroidetes; c__Bacteroidia; o__Bacteroidales; f__Bacteroidaceae; g__Bacteroides; s__caccae	40.0	0.0	0.0	0.0	0.0	0.0	0.0	0.0	35.0	0.0	0.0	82.0	0.0	0.0	0.0	0.0	0.0	0.0	0.0	0.0	0.0	0.0	0.0	0.0	0.0	0.0	0.0	0.0	19.0	0.0	0.0	0.0	0.0	0.0	107.0	0.0	212.0	0.0	0.0	0.0	0.0	0.0	60.0	0.0	0.0	28.0	0.0	0.0
1deaa873caafee0af08cf31dd3d417ee	k__Bacteria; p__Firmicutes; c__Clostridia; o__Clostridiales; f__Ruminococcaceae; g__Ruminococcus; s__	0.0	26.0	0.0	0.0	41.0	0.0	0.0	0.0	23.0	0.0	35.0	0.0	0.0	0.0	0.0	32.0	0.0	0.0	0.0	0.0	0.0	0.0	0.0	0.0	0.0	0.0	0.0	0.0	0.0	0.0	0.0	0.0	0.0	0.0	0.0	0.0	34.0	0.0	0.0	0.0	0.0	0.0	0.0	0.0	0.0	0.0	52.0	0.0
475e1d062ba9f8afb0214eb8504ff5fe	k__Bacteria; p__Bacteroidetes; c__Bacteroidia; o__Bacteroidales; f__Bacteroidaceae; g__Bacteroides; s__caccae	24.0	0.0	0.0	0.0	0.0	0.0	0.0	0.0	7.0	0.0	0.0	101.0	0.0	0.0	0.0	0.0	0.0	0.0	0.0	0.0	0.0	0.0	0.0	0.0	0.0	0.0	0.0	0.0	38.0	0.0	0.0	0.0	0.0	0.0	255.0	0.0	318.0	0.0	0.0	0.0	0.0	0.0	125.0	0.0	0.0	42.0	0.0	0.0
8756fea9655f01f98006acb89003fe14	k__Bacteria; p__Bacteroidetes; c__Bacteroidia; o__Bacteroidales; f__Bacteroidaceae; g__Bacteroides; s__ovatus	75.0	0.0	0.0	0.0	0.0	0.0	38.0	0.0	25.0	0.0	0.0	90.0	0.0	0.0	8.0	10.0	0.0	0.0	0.0	0.0	39.0	0.0	0.0	45.0	0.0	0.0	0.0	0.0	0.0	0.0	13.0	0.0	0.0	278.0	0.0	49.0	0.0	86.0	0.0	78.0	288.0	0.0	0.0	0.0	0.0	79.0	52.0	77.0
8bfc1ed4a5f080f0a0579f9118d59bde	k__Bacteria; p__Bacteroidetes; c__Bacteroidia; o__Bacteroidales; f__[Barnesiellaceae]	0.0	0.0	0.0	0.0	0.0	0.0	0.0	155.0	0.0	0.0	0.0	97.0	0.0	0.0	0.0	185.0	68.0	35.0	0.0	0.0	51.0	0.0	0.0	0.0	0.0	0.0	0.0	0.0	0.0	0.0	0.0	38.0	0.0	0.0	0.0	0.0	0.0	0.0	0.0	0.0	0.0	0.0	0.0	0.0	93.0	0.0	0.0	0.0
040de257cc935518468c9857091c84bf	k__Bacteria; p__Proteobacteria; c__Betaproteobacteria; o__Burkholderiales; f__Alcaligenaceae; g__Sutterella; s__	32.0	0.0	0.0	0.0	0.0	0.0	0.0	0.0	0.0	47.0	0.0	0.0	52.0	30.0	130.0	0.0	0.0	23.0	44.0	0.0	0.0	0.0	327.0	0.0	0.0	0.0	56.0	0.0	68.0	0.0	0.0	21.0	63.0	0.0	107.0	26.0	50.0	0.0	116.0	46.0	0.0	0.0	19.0	26.0	30.0	0.0	27.0	0.0
2d7e25672c5c15115bb9a0a30b83b35a	k__Bacteria; p__Firmicutes; c__Clostridia; o__Clostridiales; f__Lachnospiraceae; g__; s__	0.0	0.0	0.0	24.0	0.0	0.0	0.0	0.0	0.0	36.0	0.0	0.0	0.0	0.0	0.0	78.0	0.0	0.0	0.0	0.0	0.0	53.0	0.0	0.0	0.0	0.0	0.0	0.0	0.0	0.0	41.0	0.0	0.0	32.0	0.0	0.0	30.0	44.0	0.0	0.0	0.0	0.0	0.0	49.0	0.0	0.0	35.0	48.0
6045ecc6451675f685eec31810bc46ad	k__Bacteria; p__Firmicutes; c__Clostridia; o__Clostridiales; f__Lachnospiraceae; g__Coprococcus; s__	0.0	0.0	0.0	0.0	0.0	0.0	0.0	0.0	0.0	37.0	23.0	65.0	0.0	0.0	0.0	0.0	0.0	54.0	0.0	38.0	0.0	0.0	0.0	0.0	0.0	0.0	80.0	0.0	0.0	0.0	0.0	0.0	0.0	0.0	0.0	0.0	0.0	0.0	0.0	0.0	0.0	0.0	0.0	0.0	0.0	0.0	0.0	0.0
cd5d6854669b2074db513c0a77905ff7	k__Bacteria; p__Bacteroidetes; c__Bacteroidia; o__Bacteroidales; f__[Odoribacteraceae]; g__Butyricimonas; s__	0.0	0.0	0.0	0.0	0.0	0.0	0.0	0.0	0.0	42.0	0.0	0.0	0.0	0.0	0.0	0.0	0.0	0.0	0.0	0.0	0.0	0.0	0.0	0.0	0.0	0.0	0.0	0.0	0.0	0.0	0.0	0.0	0.0	0.0	0.0	20.0	0.0	8.0	0.0	0.0	0.0	0.0	35.0	25.0	0.0	0.0	0.0	0.0
934742cfc50f85bbed59ed289c749dca	k__Bacteria; p__Firmicutes; c__Clostridia; o__Clostridiales; f__Peptostreptococcaceae	26.0	60.0	54.0	38.0	185.0	25.0	44.0	89.0	47.0	36.0	85.0	35.0	0.0	50.0	0.0	46.0	60.0	57.0	56.0	28.0	46.0	0.0	80.0	62.0	56.0	59.0	40.0	130.0	29.0	68.0	53.0	69.0	73.0	71.0	428.0	0.0	65.0	137.0	78.0	0.0	89.0	48.0	48.0	43.0	75.0	0.0	21.0	44.0
1a9792aa19ba14a05542fad8f70985da	k__Bacteria; p__Bacteroidetes; c__Bacteroidia; o__Bacteroidales; f__Prevotellaceae; g__Prevotella; s__	0.0	0.0	0.0	0.0	0.0	0.0	0.0	51.0	0.0	0.0	0.0	0.0	34.0	24.0	0.0	0.0	0.0	0.0	0.0	0.0	0.0	0.0	0.0	0.0	0.0	0.0	0.0	0.0	0.0	0.0	0.0	0.0	0.0	0.0	149.0	0.0	0.0	0.0	67.0	0.0	0.0	0.0	0.0	16.0	0.0	0.0	0.0	31.0
44702aa11a284cf85c2c1f1ad3595953	k__Bacteria; p__Firmicutes; c__Clostridia; o__Clostridiales; f__Ruminococcaceae	0.0	0.0	0.0	0.0	0.0	0.0	0.0	12.0	0.0	0.0	0.0	0.0	0.0	0.0	79.0	0.0	0.0	0.0	0.0	0.0	0.0	0.0	0.0	0.0	0.0	0.0	0.0	0.0	0.0	0.0	0.0	0.0	0.0	0.0	0.0	0.0	0.0	0.0	0.0	0.0	0.0	0.0	0.0	0.0	0.0	0.0	0.0	0.0
570293912578ddb02e78369966768f95	k__Bacteria; p__Bacteroidetes; c__Bacteroidia; o__Bacteroidales; f__Bacteroidaceae; g__Bacteroides; s__plebeius	0.0	0.0	0.0	0.0	0.0	146.0	0.0	0.0	0.0	0.0	0.0	0.0	0.0	63.0	0.0	0.0	0.0	124.0	0.0	0.0	0.0	0.0	0.0	0.0	0.0	514.0	0.0	0.0	3.0	0.0	0.0	0.0	0.0	0.0	0.0	0.0	0.0	0.0	236.0	0.0	0.0	0.0	0.0	91.0	737.0	0.0	0.0	0.0
1ae691e01cb980150eedae205ce59707	k__Bacteria; p__Firmicutes; c__Clostridia; o__Clostridiales; f__Lachnospiraceae; g__Blautia	0.0	0.0	0.0	0.0	0.0	0.0	0.0	0.0	0.0	0.0	0.0	0.0	0.0	0.0	0.0	0.0	0.0	0.0	0.0	0.0	0.0	0.0	0.0	0.0	0.0	0.0	0.0	0.0	12.0	0.0	0.0	0.0	0.0	0.0	69.0	0.0	14.0	16.0	0.0	0.0	0.0	0.0	0.0	0.0	0.0	0.0	0.0	0.0
d39d123343892e1ac45b1f2440b0f51f	k__Bacteria; p__Firmicutes; c__Clostridia; o__Clostridiales; f__Lachnospiraceae; g__Coprococcus; s__eutactus	0.0	0.0	0.0	0.0	0.0	0.0	0.0	0.0	0.0	140.0	0.0	0.0	0.0	0.0	0.0	0.0	0.0	12.0	0.0	0.0	0.0	0.0	0.0	55.0	0.0	0.0	0.0	0.0	29.0	0.0	34.0	0.0	0.0	0.0	0.0	0.0	0.0	0.0	0.0	0.0	0.0	0.0	0.0	0.0	50.0	0.0	0.0	0.0
012aa3079c46750233914cd61abd603a	k__Bacteria; p__Firmicutes; c__Clostridia; o__Clostridiales; f__Lachnospiraceae	32.0	51.0	0.0	0.0	0.0	0.0	43.0	0.0	0.0	62.0	0.0	109.0	0.0	15.0	46.0	0.0	0.0	0.0	104.0	44.0	58.0	57.0	52.0	165.0	44.0	78.0	86.0	57.0	23.0	31.0	46.0	42.0	46.0	50.0	30.0	51.0	0.0	49.0	44.0	78.0	0.0	0.0	35.0	53.0	76.0	50.0	0.0	17.0
41f577269dc3eb269815f4165b2b3a44	k__Bacteria; p__Bacteroidetes; c__Bacteroidia; o__Bacteroidales; f__[Odoribacteraceae]; g__Odoribacter; s__	0.0	18.0	0.0	0.0	31.0	25.0	0.0	33.0	13.0	39.0	0.0	24.0	0.0	12.0	14.0	0.0	0.0	28.0	0.0	15.0	0.0	20.0	0.0	0.0	0.0	0.0	0.0	0.0	36.0	0.0	0.0	0.0	0.0	19.0	31.0	9.0	12.0	0.0	51.0	14.0	0.0	16.0	9.0	15.0	0.0	0.0	21.0	0.0
5a983e6bbca356cdd146d8bc573a5905	k__Bacteria; p__Firmicutes; c__Clostridia; o__Clostridiales; f__Ruminococcaceae; g__Ruminococcus; s__	0.0	0.0	0.0	0.0	0.0	0.0	0.0	0.0	0.0	0.0	0.0	0.0	0.0	0.0	0.0	0.0	0.0	0.0	14.0	0.0	0.0	0.0	0.0	0.0	0.0	0.0	0.0	0.0	0.0	0.0	0.0	0.0	0.0	0.0	0.0	0.0	0.0	0.0	0.0	0.0	0.0	0.0	0.0	0.0	0.0	0.0	15.0	0.0
259f9de084f968db2ba49e226ade646e	k__Bacteria; p__Proteobacteria; c__Deltaproteobacteria; o__Desulfovibrionales; f__Desulfovibrionaceae; g__; s__	0.0	0.0	0.0	0.0	0.0	0.0	0.0	0.0	0.0	61.0	0.0	0.0	0.0	39.0	0.0	0.0	0.0	0.0	0.0	0.0	56.0	0.0	0.0	0.0	0.0	0.0	0.0	0.0	0.0	0.0	0.0	0.0	0.0	0.0	28.0	0.0	0.0	47.0	0.0	0.0	0.0	0.0	0.0	0.0	0.0	42.0	0.0	0.0
e44cddaf13f0328de7f16c11d523943e	k__Bacteria; p__Bacteroidetes; c__Bacteroidia; o__Bacteroidales; f__Bacteroidaceae; g__Bacteroides; s__	28.0	586.0	32.0	0.0	89.0	178.0	0.0	69.0	25.0	283.0	26.0	46.0	0.0	0.0	55.0	0.0	9.0	9.0	0.0	171.0	0.0	0.0	326.0	1.0	0.0	3.0	0.0	4.0	37.0	140.0	71.0	117.0	57.0	18.0	0.0	288.0	167.0	333.0	80.0	147.0	0.0	113.0	3.0	0.0	103.0	19.0	112.0	1463.0
b8491012674fae80c01c37fe25f0accf	k__Bacteria; p__Actinobacteria; c__Actinobacteria; o__Bifidobacteriales; f__Bifidobacteriaceae; g__Bifidobacterium; s__bifidum	0.0	0.0	0.0	0.0	0.0	0.0	18.0	0.0	0.0	0.0	0.0	0.0	0.0	0.0	0.0	0.0	0.0	0.0	0.0	0.0	0.0	0.0	0.0	0.0	0.0	0.0	0.0	0.0	0.0	0.0	0.0	0.0	0.0	0.0	0.0	0.0	0.0	0.0	0.0	0.0	17.0	0.0	0.0	0.0	0.0	34.0	0.0	0.0
b836e000277d35cddbc0285d7ec6c605	k__Bacteria; p__Firmicutes; c__Clostridia; o__Clostridiales; f__Lachnospiraceae; g__; s__	0.0	31.0	0.0	0.0	0.0	30.0	97.0	0.0	0.0	0.0	0.0	0.0	22.0	0.0	0.0	45.0	0.0	64.0	0.0	0.0	0.0	60.0	25.0	44.0	17.0	52.0	68.0	49.0	0.0	0.0	24.0	37.0	0.0	0.0	42.0	0.0	0.0	0.0	0.0	47.0	0.0	0.0	0.0	60.0	22.0	0.0	0.0	0.0
c15edf605ad3098064f65ffab40fa85e	k__Bacteria; p__Bacteroidetes; c__Bacteroidia; o__Bacteroidales; f__Bacteroidaceae; g__Bacteroides; s__	0.0	0.0	0.0	0.0	0.0	0.0	0.0	286.0	0.0	0.0	0.0	0.0	23.0	20.0	0.0	0.0	0.0	0.0	0.0	0.0	0.0	0.0	0.0	1853.0	0.0	0.0	0.0	340.0	0.0	0.0	68.0	0.0	0.0	0.0	3304.0	0.0	0.0	0.0	116.0	0.0	0.0	0.0	0.0	101.0	0.0	0.0	0.0	0.0
a0dce8c768c2155d039039c993796683	k__Bacteria; p__Bacteroidetes; c__Bacteroidia; o__Bacteroidales; f__Bacteroidaceae; g__Bacteroides; s__caccae	45.0	0.0	0.0	0.0	195.0	0.0	0.0	58.0	0.0	0.0	0.0	0.0	0.0	0.0	13.0	24.0	24.0	49.0	0.0	29.0	43.0	0.0	0.0	208.0	61.0	0.0	33.0	0.0	0.0	0.0	0.0	24.0	0.0	0.0	45.0	52.0	35.0	26.0	0.0	0.0	0.0	480.0	0.0	0.0	7.0	0.0	0.0	76.0
2dde2e23ab9ebb3f989cecaa95408f22	k__Bacteria; p__Firmicutes; c__Clostridia; o__Clostridiales; f__Ruminococcaceae; g__Anaerotruncus; s__	0.0	0.0	0.0	0.0	123.0	0.0	0.0	0.0	0.0	0.0	0.0	0.0	0.0	0.0	0.0	0.0	0.0	0.0	0.0	0.0	0.0	0.0	0.0	0.0	0.0	0.0	0.0	0.0	0.0	0.0	31.0	0.0	46.0	0.0	51.0	0.0	0.0	74.0	0.0	0.0	0.0	0.0	0.0	0.0	0.0	0.0	0.0	0.0
154a7f124ebb4a5a7d5918dfccac9b0d	k__Bacteria; p__Firmicutes; c__Clostridia; o__Clostridiales; f__Ruminococcaceae	0.0	0.0	0.0	0.0	0.0	0.0	0.0	0.0	0.0	0.0	0.0	0.0	0.0	0.0	0.0	0.0	0.0	0.0	0.0	0.0	0.0	0.0	0.0	0.0	0.0	57.0	0.0	0.0	0.0	0.0	0.0	0.0	0.0	0.0	0.0	0.0	0.0	0.0	0.0	0.0	0.0	0.0	0.0	0.0	0.0	0.0	0.0	50.0
57724baca37051d22a53cbf9bda1ef9b	k__Bacteria; p__Firmicutes; c__Clostridia; o__Clostridiales; f__Veillonellaceae; g__Veillonella; s__dispar	0.0	0.0	0.0	2.0	0.0	0.0	2.0	5.0	0.0	0.0	0.0	0.0	0.0	0.0	0.0	0.0	0.0	0.0	0.0	0.0	0.0	0.0	0.0	0.0	0.0	0.0	0.0	0.0	0.0	0.0	0.0	18.0	0.0	0.0	0.0	0.0	0.0	0.0	0.0	0.0	0.0	0.0	0.0	0.0	0.0	0.0	0.0	27.0
8c5d6e5c54f106ad1d47db0da5b66c37	k__Bacteria; p__Bacteroidetes; c__Bacteroidia; o__Bacteroidales; f__Rikenellaceae; g__Alistipes; s__massiliensis	0.0	0.0	0.0	0.0	0.0	0.0	0.0	57.0	0.0	0.0	0.0	50.0	0.0	0.0	0.0	0.0	0.0	0.0	0.0	0.0	0.0	0.0	0.0	0.0	0.0	40.0	0.0	24.0	0.0	0.0	0.0	0.0	0.0	0.0	0.0	0.0	0.0	0.0	0.0	0.0	0.0	0.0	35.0	0.0	0.0	0.0	36.0	0.0
53868d70c2f6617205245f600cdfaab8	k__Bacteria; p__Firmicutes; c__Clostridia; o__Clostridiales; f__Ruminococcaceae; g__; s__	0.0	0.0	0.0	0.0	0.0	0.0	0.0	0.0	0.0	4.0	19.0	0.0	0.0	88.0	0.0	0.0	0.0	0.0	0.0	0.0	0.0	0.0	0.0	0.0	0.0	0.0	0.0	0.0	0.0	0.0	0.0	0.0	0.0	0.0	42.0	0.0	0.0	0.0	0.0	0.0	0.0	0.0	0.0	0.0	0.0	0.0	0.0	0.0
a89d1aa5d8850182a5dd2e4879c7ff2b	k__Bacteria; p__Bacteroidetes; c__Bacteroidia; o__Bacteroidales; f__Bacteroidaceae; g__Bacteroides	0.0	0.0	0.0	0.0	0.0	0.0	0.0	0.0	0.0	0.0	0.0	0.0	0.0	0.0	0.0	0.0	35.0	0.0	0.0	0.0	0.0	0.0	0.0	0.0	0.0	0.0	0.0	0.0	0.0	0.0	0.0	0.0	66.0	0.0	0.0	0.0	0.0	0.0	0.0	0.0	0.0	0.0	0.0	0.0	0.0	0.0	0.0	0.0
2635f4f7f4e7edb3c1fdc7678296521a	k__Bacteria; p__Tenericutes; c__Mollicutes; o__RF39; f__; g__; s__	0.0	0.0	0.0	0.0	0.0	0.0	0.0	0.0	29.0	0.0	9.0	0.0	0.0	0.0	0.0	38.0	42.0	0.0	0.0	0.0	0.0	0.0	0.0	0.0	0.0	27.0	25.0	0.0	0.0	0.0	0.0	0.0	0.0	0.0	0.0	0.0	0.0	0.0	0.0	0.0	0.0	0.0	0.0	0.0	0.0	0.0	0.0	0.0
76cceca3bef6af30ca107978b9c09ffd	k__Bacteria; p__Firmicutes; c__Clostridia; o__Clostridiales; f__Ruminococcaceae	0.0	0.0	0.0	0.0	0.0	0.0	0.0	0.0	0.0	0.0	0.0	0.0	0.0	0.0	0.0	0.0	0.0	0.0	0.0	0.0	0.0	0.0	0.0	0.0	0.0	71.0	0.0	0.0	0.0	0.0	28.0	0.0	0.0	0.0	0.0	0.0	0.0	0.0	0.0	0.0	0.0	0.0	0.0	0.0	0.0	0.0	0.0	0.0
3576761d06be9e601f1633197d34f401	k__Bacteria; p__Bacteroidetes; c__Bacteroidia; o__Bacteroidales; f__Bacteroidaceae; g__Bacteroides; s__	15.0	27.0	0.0	0.0	0.0	45.0	0.0	0.0	28.0	0.0	0.0	0.0	0.0	0.0	0.0	96.0	55.0	0.0	36.0	0.0	20.0	16.0	0.0	0.0	0.0	0.0	0.0	0.0	153.0	0.0	969.0	52.0	12.0	0.0	0.0	46.0	258.0	0.0	0.0	0.0	0.0	0.0	204.0	0.0	47.0	103.0	0.0	1184.0
21f479cc0c27ce14048087c7f87ff8b0	k__Bacteria; p__Firmicutes; c__Bacilli; o__Lactobacillales; f__Streptococcaceae; g__Streptococcus; s__luteciae	0.0	0.0	0.0	0.0	0.0	0.0	0.0	0.0	0.0	0.0	0.0	0.0	0.0	28.0	0.0	0.0	0.0	0.0	0.0	0.0	0.0	0.0	0.0	0.0	0.0	0.0	0.0	0.0	0.0	0.0	0.0	0.0	0.0	0.0	0.0	0.0	0.0	0.0	0.0	0.0	60.0	168.0	0.0	0.0	0.0	0.0	0.0	58.0
a9b55123bea3d816769d6243dc47360a	k__Bacteria; p__Proteobacteria; c__Gammaproteobacteria; o__Enterobacteriales; f__Enterobacteriaceae; g__Hafnia; s__alvei	0.0	0.0	0.0	0.0	0.0	0.0	0.0	0.0	0.0	0.0	0.0	0.0	0.0	21.0	0.0	0.0	0.0	0.0	0.0	0.0	0.0	0.0	0.0	0.0	0.0	0.0	0.0	0.0	0.0	0.0	0.0	0.0	0.0	0.0	0.0	0.0	0.0	35.0	0.0	0.0	26.0	0.0	0.0	0.0	0.0	0.0	0.0	0.0
30d6c88a4acc626e32111d63ec09dd5d	k__Bacteria; p__Actinobacteria; c__Actinobacteria; o__Bifidobacteriales; f__Bifidobacteriaceae; g__Bifidobacterium; s__longum	0.0	0.0	0.0	0.0	128.0	19.0	0.0	25.0	0.0	16.0	0.0	0.0	0.0	0.0	0.0	0.0	0.0	0.0	0.0	0.0	0.0	0.0	0.0	0.0	0.0	0.0	0.0	0.0	0.0	0.0	0.0	0.0	0.0	0.0	0.0	0.0	0.0	0.0	0.0	0.0	0.0	0.0	0.0	0.0	0.0	0.0	0.0	0.0
fb09bc631164309a8764315ec64c360f	k__Bacteria; p__Bacteroidetes; c__Bacteroidia; o__Bacteroidales; f__Rikenellaceae; g__; s__	0.0	0.0	0.0	0.0	0.0	0.0	37.0	0.0	0.0	12.0	0.0	43.0	44.0	77.0	62.0	33.0	33.0	46.0	0.0	0.0	0.0	0.0	73.0	0.0	0.0	26.0	47.0	0.0	29.0	0.0	107.0	22.0	43.0	67.0	97.0	66.0	0.0	101.0	0.0	0.0	0.0	4.0	0.0	33.0	0.0	0.0	0.0	0.0
6a80db4276dbdcb40927e32fb645befc	k__Bacteria; p__Firmicutes; c__Clostridia; o__Clostridiales; f__Lachnospiraceae	26.0	0.0	0.0	0.0	0.0	0.0	24.0	0.0	0.0	0.0	0.0	0.0	0.0	0.0	0.0	0.0	0.0	0.0	30.0	0.0	12.0	0.0	0.0	0.0	0.0	0.0	35.0	0.0	0.0	0.0	0.0	0.0	0.0	0.0	0.0	0.0	0.0	110.0	0.0	0.0	0.0	0.0	0.0	0.0	0.0	0.0	0.0	0.0
735f4a82678d60c439d66f568dd5ab17	k__Bacteria; p__Bacteroidetes; c__Bacteroidia; o__Bacteroidales; f__Rikenellaceae; g__; s__	0.0	28.0	0.0	0.0	0.0	0.0	0.0	0.0	0.0	0.0	0.0	0.0	0.0	0.0	0.0	0.0	0.0	0.0	0.0	0.0	0.0	0.0	0.0	0.0	0.0	0.0	0.0	0.0	0.0	0.0	0.0	49.0	0.0	0.0	0.0	0.0	0.0	43.0	0.0	0.0	0.0	25.0	0.0	0.0	28.0	0.0	0.0	0.0
babe53c89e0af620574167e4d0a901bc	k__Bacteria; p__Firmicutes; c__Clostridia; o__Clostridiales; f__Ruminococcaceae	0.0	0.0	0.0	0.0	0.0	0.0	0.0	0.0	0.0	0.0	0.0	0.0	0.0	0.0	0.0	13.0	0.0	0.0	0.0	0.0	0.0	0.0	0.0	53.0	0.0	0.0	0.0	0.0	0.0	0.0	0.0	0.0	0.0	0.0	0.0	0.0	0.0	0.0	0.0	24.0	0.0	0.0	0.0	0.0	37.0	0.0	0.0	30.0
94da80affcbc7655ee721de50e809361	k__Bacteria; p__Firmicutes; c__Clostridia; o__Clostridiales; f__Ruminococcaceae; g__Oscillospira; s__	0.0	0.0	0.0	0.0	0.0	0.0	0.0	0.0	0.0	0.0	3.0	0.0	0.0	0.0	0.0	0.0	0.0	0.0	0.0	0.0	0.0	106.0	0.0	0.0	0.0	0.0	0.0	0.0	8.0	0.0	0.0	0.0	0.0	0.0	0.0	0.0	0.0	0.0	10.0	0.0	0.0	0.0	0.0	0.0	0.0	0.0	0.0	40.0
e29036eae5e1ec94e5b028c611aec070	k__Bacteria; p__Proteobacteria; c__Deltaproteobacteria; o__Desulfovibrionales; f__Desulfovibrionaceae; g__Bilophila; s__	0.0	0.0	0.0	0.0	0.0	0.0	0.0	0.0	0.0	0.0	0.0	0.0	70.0	29.0	0.0	0.0	49.0	0.0	0.0	0.0	69.0	0.0	0.0	0.0	0.0	0.0	0.0	0.0	0.0	0.0	0.0	0.0	94.0	0.0	0.0	0.0	0.0	0.0	0.0	0.0	0.0	0.0	0.0	0.0	0.0	0.0	0.0	0.0
e7c49761e095263cda277d40819f2868	k__Bacteria; p__Bacteroidetes; c__Bacteroidia; o__Bacteroidales; f__Rikenellaceae; g__; s__	0.0	24.0	0.0	0.0	30.0	0.0	0.0	0.0	0.0	25.0	0.0	43.0	18.0	0.0	28.0	26.0	15.0	0.0	0.0	33.0	0.0	44.0	0.0	0.0	29.0	0.0	0.0	0.0	15.0	0.0	0.0	0.0	30.0	0.0	90.0	22.0	0.0	0.0	0.0	0.0	0.0	0.0	18.0	0.0	0.0	0.0	0.0	0.0
f31614fa8b335aec13fb329de67a4fa0	k__Bacteria; p__Firmicutes; c__Clostridia; o__Clostridiales; f__Ruminococcaceae; g__Ruminococcus; s__bromii	0.0	0.0	0.0	0.0	0.0	16.0	3.0	494.0	0.0	0.0	0.0	0.0	0.0	0.0	0.0	0.0	0.0	97.0	0.0	0.0	0.0	0.0	0.0	0.0	0.0	0.0	33.0	0.0	0.0	0.0	0.0	0.0	0.0	0.0	954.0	0.0	0.0	0.0	38.0	50.0	0.0	424.0	0.0	0.0	0.0	0.0	0.0	0.0
d0c43ea4049b44240fe20507dbea87bc	k__Bacteria; p__Firmicutes; c__Clostridia; o__Clostridiales; f__Lachnospiraceae	0.0	0.0	0.0	39.0	0.0	0.0	0.0	0.0	0.0	0.0	0.0	54.0	49.0	46.0	0.0	0.0	0.0	0.0	0.0	0.0	0.0	0.0	34.0	0.0	0.0	0.0	73.0	0.0	0.0	0.0	39.0	0.0	0.0	92.0	0.0	0.0	0.0	0.0	0.0	0.0	0.0	0.0	0.0	0.0	0.0	0.0	0.0	0.0
f584e5b975da410ddbc7c1566cd1828c	k__Bacteria; p__Bacteroidetes; c__Bacteroidia; o__Bacteroidales; f__Porphyromonadaceae; g__Parabacteroides; s__	0.0	0.0	0.0	0.0	0.0	0.0	0.0	0.0	0.0	0.0	0.0	0.0	0.0	0.0	0.0	0.0	61.0	0.0	0.0	0.0	0.0	0.0	0.0	0.0	0.0	0.0	0.0	25.0	0.0	0.0	0.0	0.0	59.0	0.0	0.0	0.0	0.0	0.0	0.0	58.0	0.0	0.0	0.0	0.0	0.0	0.0	0.0	0.0
214514da88998f01673bdfa69d09284a	k__Bacteria; p__Firmicutes; c__Clostridia; o__Clostridiales; f__Ruminococcaceae; g__Oscillospira; s__	0.0	0.0	0.0	0.0	0.0	23.0	0.0	0.0	0.0	204.0	0.0	0.0	0.0	58.0	0.0	0.0	0.0	38.0	0.0	0.0	0.0	0.0	0.0	0.0	0.0	0.0	42.0	0.0	0.0	0.0	0.0	0.0	44.0	49.0	29.0	0.0	0.0	0.0	0.0	0.0	0.0	0.0	0.0	0.0	0.0	0.0	0.0	62.0
73147dd121dac41d025c8796a16517b2	k__Bacteria; p__Firmicutes; c__Bacilli; o__Lactobacillales; f__Enterococcaceae; g__Enterococcus; s__	0.0	0.0	0.0	0.0	8.0	3.0	0.0	0.0	0.0	0.0	0.0	0.0	0.0	0.0	0.0	0.0	0.0	0.0	0.0	0.0	0.0	0.0	0.0	0.0	0.0	0.0	0.0	4.0	0.0	0.0	0.0	0.0	0.0	0.0	0.0	0.0	0.0	0.0	0.0	0.0	39.0	0.0	0.0	0.0	0.0	0.0	0.0	0.0
390c0a81d2994fe4df702c104e6113b4	k__Bacteria; p__Firmicutes; c__Clostridia; o__Clostridiales; f__Lachnospiraceae; g__Coprococcus; s__	0.0	0.0	0.0	0.0	0.0	0.0	0.0	0.0	0.0	0.0	0.0	0.0	0.0	0.0	0.0	42.0	0.0	0.0	0.0	0.0	0.0	0.0	0.0	0.0	0.0	0.0	0.0	0.0	0.0	0.0	0.0	0.0	0.0	0.0	0.0	0.0	0.0	0.0	0.0	0.0	0.0	63.0	0.0	0.0	0.0	0.0	0.0	48.0
62ea06db33929b9104e619db2a37ac7e	k__Bacteria; p__Firmicutes; c__Clostridia; o__Clostridiales; f__Ruminococcaceae; g__Faecalibacterium; s__prausnitzii	0.0	0.0	0.0	0.0	0.0	0.0	0.0	0.0	0.0	0.0	0.0	0.0	0.0	15.0	0.0	29.0	0.0	0.0	0.0	0.0	0.0	0.0	0.0	0.0	0.0	0.0	0.0	0.0	0.0	0.0	36.0	0.0	0.0	0.0	0.0	0.0	0.0	0.0	0.0	0.0	0.0	0.0	0.0	0.0	0.0	0.0	7.0	0.0
56567c8521d60354fbb1f6b01ab8bd95	k__Bacteria; p__Bacteroidetes; c__Bacteroidia; o__Bacteroidales; f__[Barnesiellaceae]	0.0	0.0	0.0	0.0	0.0	0.0	0.0	0.0	0.0	0.0	0.0	0.0	0.0	0.0	0.0	20.0	3.0	0.0	198.0	0.0	0.0	0.0	0.0	0.0	0.0	0.0	0.0	0.0	0.0	0.0	0.0	15.0	0.0	0.0	3.0	0.0	0.0	0.0	0.0	0.0	0.0	0.0	0.0	0.0	83.0	0.0	0.0	0.0
9495ac1ea02b78c8c7782b98f4cf5c59	k__Bacteria; p__Firmicutes; c__Clostridia; o__Clostridiales; f__Ruminococcaceae; g__; s__	0.0	36.0	0.0	0.0	0.0	52.0	0.0	46.0	0.0	0.0	144.0	0.0	40.0	0.0	0.0	0.0	0.0	0.0	0.0	0.0	0.0	0.0	0.0	0.0	0.0	0.0	0.0	0.0	75.0	0.0	0.0	82.0	18.0	78.0	0.0	0.0	0.0	0.0	0.0	0.0	0.0	0.0	0.0	0.0	0.0	0.0	67.0	0.0
79a5690bb7e28e6961821591fb91956e	k__Bacteria; p__Firmicutes; c__Clostridia; o__Clostridiales; f__; g__; s__	0.0	0.0	0.0	0.0	0.0	0.0	0.0	25.0	0.0	0.0	0.0	0.0	0.0	0.0	0.0	0.0	0.0	0.0	0.0	0.0	0.0	0.0	0.0	0.0	0.0	0.0	0.0	0.0	0.0	0.0	0.0	39.0	89.0	0.0	0.0	0.0	0.0	42.0	0.0	0.0	0.0	0.0	0.0	0.0	0.0	0.0	35.0	0.0
71f72f5c41cc7268202b1f1359e873b5	k__Bacteria; p__Bacteroidetes; c__Bacteroidia; o__Bacteroidales; f__Porphyromonadaceae; g__Parabacteroides; s__distasonis	0.0	0.0	0.0	0.0	0.0	0.0	0.0	0.0	4.0	0.0	0.0	0.0	0.0	4.0	0.0	1.0	0.0	0.0	0.0	0.0	0.0	0.0	0.0	0.0	10.0	0.0	0.0	0.0	0.0	0.0	0.0	0.0	0.0	0.0	0.0	0.0	0.0	0.0	0.0	0.0	0.0	0.0	0.0	0.0	0.0	0.0	0.0	15.0
b1334610bc3aeaafed28aca5d7d9a6b4	k__Bacteria; p__Firmicutes; c__Clostridia; o__Clostridiales; f__Lachnospiraceae; g__Lachnospira; s__	0.0	36.0	0.0	0.0	0.0	0.0	28.0	22.0	0.0	0.0	0.0	0.0	27.0	27.0	304.0	0.0	58.0	27.0	0.0	33.0	134.0	0.0	38.0	0.0	0.0	43.0	41.0	0.0	0.0	0.0	57.0	0.0	0.0	0.0	42.0	0.0	0.0	0.0	35.0	0.0	38.0	0.0	0.0	0.0	59.0	90.0	56.0	29.0
ad76ded727429d1b179ada0743fb90d2	k__Bacteria; p__Bacteroidetes; c__Bacteroidia; o__Bacteroidales; f__Rikenellaceae; g__Alistipes; s__finegoldii	0.0	0.0	0.0	0.0	0.0	0.0	0.0	0.0	0.0	0.0	0.0	0.0	0.0	0.0	27.0	0.0	0.0	0.0	0.0	0.0	0.0	0.0	0.0	0.0	0.0	0.0	0.0	0.0	0.0	0.0	43.0	0.0	0.0	20.0	29.0	0.0	34.0	56.0	0.0	0.0	0.0	0.0	0.0	0.0	0.0	0.0	0.0	0.0
7805bd87e8704f3a941103f36e6acd30	k__Bacteria; p__Bacteroidetes; c__Bacteroidia; o__Bacteroidales; f__Rikenellaceae; g__Alistipes; s__onderdonkii	25.0	56.0	0.0	0.0	687.0	45.0	0.0	0.0	26.0	43.0	0.0	139.0	42.0	26.0	0.0	0.0	33.0	0.0	0.0	119.0	0.0	0.0	0.0	40.0	346.0	172.0	30.0	0.0	0.0	0.0	222.0	72.0	0.0	93.0	41.0	0.0	121.0	0.0	54.0	0.0	0.0	0.0	46.0	74.0	0.0	52.0	24.0	481.0
8423f54ab5e4448701ba6e578917f124	k__Bacteria; p__Firmicutes; c__Clostridia; o__Clostridiales; f__Ruminococcaceae; g__Oscillospira; s__	0.0	0.0	0.0	0.0	11.0	0.0	0.0	0.0	0.0	22.0	0.0	0.0	0.0	35.0	0.0	0.0	0.0	0.0	0.0	0.0	0.0	0.0	0.0	0.0	0.0	0.0	0.0	0.0	0.0	0.0	0.0	0.0	0.0	0.0	0.0	0.0	0.0	0.0	0.0	34.0	0.0	0.0	0.0	0.0	0.0	0.0	0.0	0.0
602b2f88f19ae2e006295e560c42a4dc	k__Bacteria; p__Proteobacteria; c__Gammaproteobacteria; o__Enterobacteriales; f__Enterobacteriaceae; g__Serratia; s__	0.0	0.0	0.0	0.0	0.0	0.0	0.0	0.0	0.0	0.0	0.0	0.0	0.0	0.0	0.0	0.0	0.0	0.0	0.0	0.0	0.0	0.0	0.0	0.0	0.0	0.0	0.0	0.0	0.0	0.0	0.0	0.0	0.0	0.0	0.0	0.0	0.0	0.0	0.0	0.0	18.0	0.0	0.0	0.0	0.0	0.0	0.0	5.0
f3214ebc67240fbde535b25c706455fb	k__Bacteria; p__Firmicutes; c__Clostridia; o__Clostridiales; f__Ruminococcaceae; g__; s__	0.0	27.0	0.0	0.0	0.0	48.0	0.0	12.0	0.0	0.0	159.0	0.0	54.0	0.0	0.0	0.0	0.0	0.0	0.0	0.0	0.0	0.0	0.0	0.0	0.0	0.0	0.0	0.0	78.0	0.0	0.0	102.0	52.0	83.0	0.0	0.0	0.0	0.0	0.0	0.0	0.0	14.0	0.0	0.0	0.0	0.0	65.0	0.0
358d66b20024fb73352ee93e1044825d	k__Bacteria; p__Firmicutes; c__Clostridia; o__Clostridiales; f__Ruminococcaceae	0.0	0.0	0.0	0.0	82.0	0.0	95.0	0.0	0.0	16.0	36.0	0.0	0.0	0.0	0.0	78.0	39.0	0.0	52.0	22.0	0.0	0.0	85.0	17.0	46.0	0.0	0.0	0.0	55.0	0.0	0.0	0.0	0.0	0.0	26.0	0.0	38.0	91.0	0.0	0.0	52.0	175.0	35.0	0.0	0.0	66.0	11.0	34.0
8675554d65cea8f227b365ba0cce00a9	k__Bacteria; p__Firmicutes; c__Clostridia; o__Clostridiales; f__Lachnospiraceae; g__; s__	0.0	39.0	0.0	18.0	0.0	53.0	0.0	0.0	0.0	34.0	0.0	72.0	0.0	0.0	35.0	0.0	0.0	0.0	0.0	15.0	0.0	0.0	0.0	65.0	0.0	61.0	58.0	41.0	100.0	32.0	0.0	0.0	0.0	0.0	15.0	47.0	25.0	0.0	13.0	37.0	0.0	0.0	23.0	0.0	7.0	0.0	0.0	38.0
55bea8f903482f1a54bcf49b92d3b4d3	k__Bacteria; p__Firmicutes; c__Clostridia; o__Clostridiales; f__Clostridiaceae; g__Clostridium; s__	0.0	68.0	0.0	39.0	0.0	16.0	16.0	0.0	15.0	0.0	0.0	17.0	0.0	19.0	17.0	16.0	0.0	34.0	0.0	0.0	24.0	0.0	0.0	14.0	0.0	0.0	32.0	24.0	0.0	0.0	24.0	0.0	0.0	0.0	30.0	30.0	33.0	0.0	0.0	32.0	10.0	0.0	0.0	0.0	103.0	0.0	0.0	66.0
849525d791860e0ea38af75525919f90	k__Bacteria; p__Firmicutes; c__Bacilli; o__Lactobacillales; f__Streptococcaceae; g__Streptococcus; s__	0.0	0.0	0.0	0.0	0.0	0.0	0.0	0.0	0.0	0.0	0.0	0.0	0.0	0.0	0.0	0.0	0.0	0.0	0.0	0.0	0.0	0.0	0.0	0.0	0.0	0.0	0.0	0.0	0.0	0.0	0.0	0.0	0.0	0.0	0.0	0.0	0.0	1.0	0.0	0.0	2.0	0.0	0.0	0.0	0.0	0.0	0.0	1.0
a24bb7f414a7cc872a3bbbc750c15b32	k__Bacteria; p__Firmicutes; c__Clostridia; o__Clostridiales; f__Lachnospiraceae; g__Lachnospira; s__	0.0	49.0	0.0	22.0	0.0	41.0	0.0	43.0	0.0	147.0	0.0	72.0	61.0	48.0	0.0	20.0	44.0	183.0	0.0	43.0	0.0	67.0	0.0	0.0	72.0	0.0	126.0	0.0	0.0	18.0	70.0	24.0	0.0	44.0	0.0	185.0	0.0	0.0	68.0	325.0	0.0	37.0	156.0	40.0	243.0	0.0	0.0	10.0
062eb38a2a31b8aa874e42f4be9baf56	k__Bacteria; p__Firmicutes; c__Clostridia; o__Clostridiales; f__Ruminococcaceae; g__Butyricicoccus; s__pullicaecorum	0.0	0.0	0.0	0.0	0.0	0.0	0.0	12.0	0.0	18.0	0.0	0.0	0.0	0.0	59.0	0.0	0.0	0.0	57.0	0.0	0.0	0.0	76.0	36.0	94.0	0.0	0.0	0.0	127.0	0.0	0.0	0.0	0.0	0.0	43.0	59.0	0.0	0.0	118.0	41.0	39.0	0.0	20.0	0.0	0.0	79.0	0.0	120.0
a6953de8f33b5b26d14ab7ca2feb4c38	k__Bacteria; p__Bacteroidetes; c__Bacteroidia; o__Bacteroidales; f__Bacteroidaceae; g__Bacteroides; s__	0.0	0.0	0.0	0.0	0.0	0.0	0.0	416.0	0.0	0.0	0.0	0.0	21.0	14.0	0.0	0.0	0.0	0.0	0.0	0.0	0.0	0.0	0.0	1636.0	0.0	0.0	0.0	323.0	0.0	0.0	0.0	0.0	0.0	0.0	2902.0	0.0	0.0	0.0	100.0	0.0	0.0	0.0	0.0	84.0	0.0	0.0	0.0	0.0
38609daaed45410d12c034b19c432520	k__Bacteria; p__Firmicutes; c__Clostridia; o__Clostridiales; f__Ruminococcaceae; g__Ruminococcus; s__	0.0	0.0	0.0	0.0	0.0	32.0	0.0	28.0	0.0	32.0	47.0	0.0	0.0	0.0	0.0	0.0	0.0	0.0	0.0	0.0	0.0	0.0	28.0	0.0	0.0	0.0	88.0	0.0	47.0	0.0	0.0	56.0	46.0	0.0	54.0	0.0	0.0	75.0	28.0	0.0	0.0	0.0	27.0	0.0	0.0	0.0	0.0	0.0
3bf9d4907ae3764c5463b268ac00c747	k__Bacteria; p__Firmicutes; c__Clostridia; o__Clostridiales	0.0	0.0	0.0	0.0	0.0	0.0	0.0	0.0	0.0	61.0	0.0	0.0	0.0	0.0	53.0	86.0	0.0	0.0	0.0	0.0	25.0	53.0	51.0	62.0	35.0	37.0	56.0	33.0	0.0	55.0	49.0	12.0	0.0	0.0	0.0	34.0	27.0	0.0	32.0	0.0	0.0	49.0	40.0	30.0	0.0	0.0	0.0	80.0
70aabb9ef269b041deb7bb0b27b435ca	k__Bacteria; p__Firmicutes; c__Clostridia; o__Clostridiales; f__Clostridiaceae; g__; s__	0.0	51.0	0.0	0.0	40.0	67.0	0.0	0.0	0.0	0.0	0.0	66.0	87.0	41.0	0.0	0.0	0.0	0.0	0.0	0.0	0.0	0.0	0.0	27.0	0.0	0.0	47.0	0.0	0.0	0.0	0.0	0.0	23.0	0.0	19.0	0.0	38.0	0.0	0.0	0.0	0.0	0.0	0.0	0.0	0.0	0.0	0.0	0.0
b9fa11e70b81a3e56ba1ab1f73540342	k__Bacteria; p__Firmicutes; c__Bacilli; o__Lactobacillales; f__Enterococcaceae; g__Enterococcus; s__	0.0	0.0	0.0	0.0	0.0	0.0	0.0	9.0	0.0	23.0	0.0	0.0	0.0	7.0	0.0	0.0	0.0	0.0	0.0	12.0	0.0	0.0	0.0	0.0	0.0	0.0	0.0	22.0	0.0	0.0	0.0	0.0	0.0	0.0	0.0	0.0	0.0	35.0	0.0	0.0	0.0	0.0	0.0	0.0	0.0	0.0	0.0	0.0
54b0d017402f3d46bb06a24ff9d12eb6	k__Bacteria; p__Firmicutes; c__Clostridia; o__Clostridiales; f__Lachnospiraceae	14.0	20.0	0.0	0.0	0.0	42.0	34.0	0.0	31.0	38.0	0.0	44.0	0.0	30.0	40.0	0.0	67.0	0.0	35.0	70.0	36.0	55.0	56.0	136.0	31.0	89.0	35.0	69.0	60.0	43.0	56.0	57.0	58.0	32.0	46.0	47.0	51.0	30.0	50.0	0.0	0.0	0.0	53.0	56.0	53.0	36.0	0.0	25.0
d0933d15eda272e92bbe61eecdd755ad	k__Bacteria; p__Proteobacteria; c__Betaproteobacteria; o__Burkholderiales; f__Alcaligenaceae; g__Sutterella; s__	0.0	26.0	0.0	0.0	0.0	0.0	0.0	0.0	0.0	0.0	0.0	0.0	0.0	45.0	0.0	0.0	22.0	0.0	0.0	0.0	0.0	0.0	0.0	0.0	0.0	0.0	0.0	0.0	0.0	0.0	0.0	0.0	0.0	0.0	0.0	0.0	0.0	0.0	0.0	0.0	0.0	0.0	0.0	0.0	0.0	0.0	0.0	0.0
8441054de135e4d6039955ddc649f742	k__Bacteria; p__Bacteroidetes; c__Bacteroidia; o__Bacteroidales; f__Bacteroidaceae; g__Bacteroides; s__ovatus	0.0	0.0	0.0	15.0	68.0	39.0	0.0	0.0	28.0	35.0	0.0	15.0	0.0	0.0	21.0	38.0	0.0	0.0	0.0	25.0	0.0	0.0	0.0	0.0	22.0	31.0	15.0	0.0	0.0	19.0	10.0	0.0	0.0	16.0	58.0	4.0	35.0	0.0	0.0	0.0	0.0	29.0	16.0	0.0	0.0	0.0	13.0	0.0
40c855293674dba308821b57a38bba39	k__Bacteria; p__Bacteroidetes; c__Bacteroidia; o__Bacteroidales; f__[Odoribacteraceae]; g__Butyricimonas; s__	0.0	0.0	0.0	0.0	0.0	0.0	0.0	0.0	0.0	0.0	0.0	0.0	15.0	0.0	0.0	0.0	0.0	0.0	43.0	0.0	0.0	0.0	0.0	11.0	0.0	0.0	0.0	0.0	0.0	0.0	0.0	0.0	0.0	0.0	0.0	13.0	0.0	0.0	0.0	0.0	0.0	0.0	13.0	17.0	0.0	0.0	0.0	0.0
f1a808eab1009df05ad98cfd791c0ee0	k__Bacteria; p__Bacteroidetes; c__Bacteroidia; o__Bacteroidales; f__Rikenellaceae; g__; s__	0.0	33.0	0.0	0.0	0.0	0.0	0.0	0.0	0.0	0.0	0.0	0.0	0.0	0.0	0.0	0.0	0.0	3.0	0.0	0.0	0.0	0.0	0.0	0.0	0.0	0.0	7.0	0.0	0.0	0.0	21.0	17.0	22.0	0.0	8.0	0.0	0.0	5.0	12.0	0.0	0.0	0.0	0.0	0.0	0.0	0.0	0.0	0.0
637b4631981bc0c6df2f2af9604025dc	k__Bacteria; p__Firmicutes; c__Clostridia; o__Clostridiales	0.0	0.0	0.0	0.0	0.0	0.0	0.0	0.0	0.0	0.0	0.0	0.0	0.0	0.0	0.0	0.0	0.0	0.0	0.0	0.0	0.0	0.0	0.0	0.0	0.0	0.0	0.0	0.0	0.0	64.0	0.0	0.0	0.0	0.0	0.0	0.0	0.0	0.0	0.0	0.0	0.0	0.0	0.0	0.0	0.0	0.0	0.0	0.0
0b0b42bcfa06999b5bf10f74b2031be2	k__Bacteria; p__Proteobacteria; c__Gammaproteobacteria; o__Pasteurellales; f__Pasteurellaceae; g__Haemophilus; s__parainfluenzae	0.0	0.0	0.0	0.0	0.0	0.0	0.0	0.0	25.0	0.0	0.0	0.0	0.0	0.0	0.0	0.0	0.0	0.0	0.0	0.0	0.0	0.0	0.0	0.0	0.0	0.0	0.0	0.0	0.0	0.0	0.0	6.0	0.0	0.0	0.0	0.0	0.0	0.0	0.0	0.0	0.0	0.0	0.0	0.0	0.0	0.0	0.0	6.0
9346a11fc98aa8456f0ea07443c293b9	k__Bacteria; p__Firmicutes; c__Clostridia; o__Clostridiales; f__Lachnospiraceae; g__Coprococcus; s__	0.0	0.0	100.0	91.0	0.0	26.0	25.0	28.0	41.0	64.0	0.0	59.0	36.0	39.0	26.0	0.0	45.0	40.0	91.0	28.0	20.0	87.0	38.0	38.0	48.0	36.0	36.0	38.0	0.0	0.0	0.0	45.0	0.0	50.0	231.0	0.0	29.0	90.0	0.0	76.0	0.0	20.0	30.0	36.0	41.0	63.0	24.0	31.0
a62f8016e4d40e97ff1c1eb3022a9210	k__Bacteria; p__Bacteroidetes; c__Bacteroidia; o__Bacteroidales; f__Prevotellaceae; g__Prevotella; s__copri	0.0	0.0	0.0	0.0	0.0	0.0	0.0	181.0	0.0	29.0	0.0	0.0	0.0	0.0	0.0	0.0	0.0	9.0	0.0	0.0	0.0	0.0	0.0	0.0	0.0	0.0	19.0	0.0	35.0	0.0	0.0	0.0	0.0	0.0	0.0	0.0	0.0	0.0	0.0	0.0	0.0	0.0	0.0	0.0	0.0	0.0	0.0	0.0
c373af415bda125f4c3a9aa0d18616b2	k__Bacteria; p__Bacteroidetes; c__Bacteroidia; o__Bacteroidales; f__Porphyromonadaceae; g__Parabacteroides; s__distasonis	0.0	0.0	0.0	0.0	0.0	0.0	0.0	0.0	0.0	51.0	0.0	0.0	0.0	0.0	0.0	0.0	0.0	0.0	0.0	0.0	0.0	0.0	0.0	0.0	0.0	0.0	0.0	0.0	0.0	0.0	28.0	0.0	0.0	0.0	0.0	0.0	0.0	0.0	0.0	0.0	0.0	0.0	0.0	0.0	0.0	0.0	0.0	0.0
926fd7e5569da3c6943fcef4f9c0fb2a	k__Bacteria; p__Firmicutes; c__Clostridia; o__Clostridiales; f__Lachnospiraceae; g__; s__	0.0	0.0	0.0	0.0	0.0	0.0	0.0	0.0	0.0	0.0	0.0	38.0	0.0	0.0	19.0	0.0	0.0	0.0	0.0	25.0	0.0	0.0	0.0	0.0	0.0	0.0	36.0	0.0	0.0	0.0	21.0	0.0	0.0	0.0	18.0	0.0	0.0	0.0	0.0	0.0	0.0	0.0	0.0	0.0	0.0	0.0	0.0	8.0
30d4fcda1e5839bf4a3db37995781daa	k__Bacteria; p__Firmicutes; c__Clostridia; o__Clostridiales; f__Lachnospiraceae	0.0	0.0	0.0	0.0	615.0	0.0	0.0	0.0	0.0	0.0	0.0	0.0	0.0	0.0	0.0	0.0	0.0	0.0	0.0	0.0	0.0	0.0	0.0	0.0	0.0	0.0	0.0	0.0	0.0	0.0	0.0	0.0	0.0	0.0	0.0	0.0	0.0	19.0	0.0	0.0	0.0	43.0	0.0	0.0	0.0	0.0	0.0	23.0
66d65c3af2af03cefca853351e8b2f3f	k__Bacteria; p__Firmicutes; c__Clostridia; o__Clostridiales; f__Ruminococcaceae; g__Oscillospira; s__	0.0	36.0	0.0	0.0	52.0	38.0	0.0	0.0	0.0	29.0	0.0	0.0	0.0	0.0	0.0	0.0	0.0	0.0	27.0	0.0	0.0	0.0	17.0	0.0	0.0	0.0	0.0	0.0	0.0	0.0	0.0	0.0	0.0	0.0	0.0	16.0	31.0	0.0	0.0	46.0	10.0	0.0	0.0	0.0	0.0	11.0	19.0	31.0
7505c2e28369c417af52e2cbbedd2c2c	k__Bacteria; p__Proteobacteria; c__Betaproteobacteria; o__Burkholderiales; f__Alcaligenaceae; g__Sutterella; s__	35.0	0.0	0.0	0.0	0.0	0.0	0.0	0.0	16.0	14.0	0.0	0.0	0.0	0.0	0.0	0.0	7.0	0.0	0.0	89.0	720.0	0.0	0.0	32.0	53.0	227.0	0.0	0.0	0.0	0.0	0.0	0.0	0.0	0.0	8.0	6.0	0.0	23.0	0.0	0.0	0.0	0.0	0.0	4.0	0.0	17.0	0.0	0.0
f06b12915e68a078f8580a6c564f43b7	k__Bacteria; p__Actinobacteria; c__Coriobacteriia; o__Coriobacteriales; f__Coriobacteriaceae; g__; s__	0.0	0.0	0.0	0.0	0.0	0.0	0.0	0.0	0.0	0.0	0.0	0.0	0.0	0.0	0.0	0.0	28.0	0.0	0.0	0.0	0.0	0.0	0.0	0.0	0.0	0.0	0.0	0.0	0.0	0.0	0.0	0.0	0.0	0.0	0.0	0.0	5.0	26.0	0.0	0.0	0.0	0.0	0.0	0.0	0.0	0.0	0.0	0.0
e3c5b6c23bfbda24b58a8daa1d3658bf	k__Bacteria; p__Bacteroidetes; c__Bacteroidia; o__Bacteroidales; f__Bacteroidaceae; g__Bacteroides; s__	0.0	16.0	0.0	237.0	0.0	0.0	0.0	0.0	83.0	0.0	22.0	0.0	0.0	0.0	74.0	128.0	0.0	0.0	0.0	0.0	7.0	0.0	0.0	37.0	607.0	71.0	0.0	0.0	0.0	0.0	0.0	10.0	0.0	16.0	0.0	0.0	0.0	0.0	0.0	0.0	0.0	0.0	201.0	0.0	28.0	58.0	0.0	9.0
a3b22f3920bf042bcf0390996c35e091	k__Bacteria; p__Firmicutes; c__Clostridia; o__Clostridiales; f__Ruminococcaceae	0.0	0.0	0.0	0.0	0.0	0.0	0.0	0.0	0.0	0.0	0.0	0.0	0.0	0.0	0.0	22.0	0.0	0.0	0.0	0.0	0.0	0.0	0.0	0.0	0.0	26.0	0.0	52.0	0.0	0.0	0.0	0.0	0.0	0.0	0.0	0.0	0.0	0.0	0.0	0.0	0.0	0.0	0.0	0.0	0.0	0.0	0.0	0.0
0eaaa3ebc7d5f36ee7f8578f6f026fa6	k__Bacteria; p__Bacteroidetes; c__Bacteroidia; o__Bacteroidales; f__[Paraprevotellaceae]; g__Paraprevotella; s__	0.0	0.0	0.0	0.0	0.0	88.0	0.0	22.0	0.0	29.0	0.0	0.0	0.0	0.0	0.0	0.0	96.0	0.0	0.0	0.0	0.0	0.0	0.0	0.0	0.0	0.0	0.0	0.0	102.0	0.0	0.0	23.0	0.0	0.0	0.0	0.0	0.0	0.0	69.0	0.0	29.0	0.0	0.0	0.0	0.0	0.0	0.0	0.0
c4a6db504de37f6929170ab796c0dd2e	k__Bacteria; p__Firmicutes; c__Clostridia; o__Clostridiales; f__Lachnospiraceae; g__Anaerostipes; s__	0.0	0.0	0.0	0.0	0.0	0.0	19.0	0.0	0.0	0.0	0.0	0.0	0.0	0.0	0.0	0.0	0.0	0.0	30.0	0.0	47.0	0.0	0.0	0.0	0.0	0.0	61.0	45.0	0.0	0.0	0.0	0.0	0.0	0.0	32.0	0.0	0.0	0.0	0.0	0.0	0.0	0.0	38.0	0.0	35.0	0.0	0.0	0.0
4f4855195bcf45d5be0bf8d614002c99	k__Bacteria; p__Bacteroidetes; c__Bacteroidia; o__Bacteroidales; f__Bacteroidaceae; g__Bacteroides; s__coprophilus	0.0	0.0	0.0	0.0	0.0	0.0	0.0	0.0	0.0	0.0	0.0	0.0	0.0	0.0	0.0	0.0	0.0	237.0	0.0	0.0	0.0	0.0	0.0	0.0	0.0	0.0	0.0	0.0	74.0	0.0	0.0	0.0	0.0	122.0	0.0	256.0	0.0	0.0	0.0	0.0	0.0	0.0	0.0	0.0	0.0	0.0	0.0	0.0
622156861f7db5bd4c3636dc6c77007e	k__Bacteria; p__Firmicutes; c__Clostridia; o__Clostridiales; f__Ruminococcaceae; g__Ruminococcus; s__	0.0	4.0	0.0	0.0	11.0	0.0	0.0	0.0	0.0	0.0	0.0	0.0	0.0	0.0	0.0	0.0	0.0	0.0	0.0	0.0	0.0	0.0	0.0	0.0	0.0	0.0	0.0	0.0	0.0	0.0	0.0	0.0	0.0	0.0	0.0	0.0	24.0	0.0	0.0	0.0	0.0	0.0	0.0	0.0	0.0	0.0	0.0	0.0
5bfd70dadfe545f1cb6b19e776c968da	k__Bacteria; p__Firmicutes; c__Clostridia; o__Clostridiales; f__Veillonellaceae; g__Phascolarctobacterium; s__	0.0	0.0	0.0	0.0	0.0	0.0	0.0	0.0	0.0	239.0	0.0	0.0	33.0	220.0	0.0	0.0	8.0	0.0	0.0	0.0	0.0	0.0	0.0	0.0	0.0	0.0	0.0	0.0	0.0	0.0	0.0	0.0	0.0	0.0	0.0	0.0	0.0	0.0	0.0	0.0	0.0	0.0	0.0	25.0	0.0	0.0	43.0	0.0
40b20cf1f55c1c2c779996114967496f	k__Bacteria; p__Firmicutes; c__Clostridia; o__Clostridiales; f__Veillonellaceae; g__Dialister; s__	0.0	0.0	23.0	0.0	0.0	0.0	0.0	0.0	0.0	78.0	0.0	0.0	0.0	0.0	0.0	0.0	0.0	0.0	0.0	0.0	45.0	0.0	0.0	0.0	0.0	0.0	0.0	0.0	0.0	0.0	0.0	0.0	0.0	0.0	46.0	0.0	0.0	0.0	0.0	0.0	0.0	0.0	0.0	0.0	0.0	0.0	0.0	0.0
971702b026c755abc5c2aa33f8818de0	k__Bacteria; p__Actinobacteria; c__Actinobacteria; o__Bifidobacteriales; f__Bifidobacteriaceae; g__Bifidobacterium; s__adolescentis	0.0	38.0	0.0	0.0	117.0	0.0	36.0	0.0	44.0	38.0	51.0	13.0	42.0	31.0	57.0	0.0	49.0	28.0	43.0	0.0	0.0	0.0	0.0	89.0	102.0	44.0	0.0	0.0	53.0	0.0	0.0	0.0	33.0	0.0	46.0	0.0	0.0	41.0	45.0	0.0	77.0	0.0	0.0	60.0	0.0	91.0	43.0	0.0
ab52816aba7e9ed5864f8ec8107cc14d	k__Bacteria; p__Firmicutes; c__Clostridia; o__Clostridiales; f__Ruminococcaceae; g__Oscillospira; s__	0.0	0.0	0.0	0.0	0.0	38.0	0.0	0.0	0.0	37.0	0.0	0.0	0.0	0.0	0.0	0.0	0.0	0.0	0.0	0.0	0.0	0.0	0.0	0.0	0.0	0.0	0.0	0.0	0.0	0.0	0.0	0.0	0.0	0.0	0.0	0.0	0.0	0.0	0.0	0.0	0.0	0.0	0.0	0.0	0.0	0.0	0.0	0.0
75aa2221c9946f021d13edf9cbc27d39	k__Bacteria; p__Bacteroidetes; c__Bacteroidia; o__Bacteroidales; f__Rikenellaceae; g__Alistipes; s__finegoldii	0.0	0.0	0.0	0.0	0.0	0.0	0.0	0.0	0.0	0.0	0.0	0.0	0.0	0.0	13.0	0.0	0.0	0.0	0.0	0.0	0.0	0.0	0.0	0.0	0.0	0.0	0.0	0.0	0.0	0.0	27.0	0.0	0.0	26.0	26.0	0.0	33.0	55.0	0.0	0.0	0.0	0.0	0.0	0.0	0.0	0.0	0.0	0.0
f539149b836c447597785d2d3d1208c4	k__Bacteria; p__Bacteroidetes; c__Bacteroidia; o__Bacteroidales; f__Bacteroidaceae; g__Bacteroides; s__eggerthii	0.0	0.0	0.0	0.0	189.0	0.0	0.0	71.0	0.0	0.0	7.0	0.0	0.0	0.0	15.0	0.0	0.0	0.0	0.0	0.0	0.0	0.0	168.0	0.0	0.0	0.0	0.0	0.0	35.0	0.0	0.0	92.0	0.0	0.0	0.0	0.0	0.0	0.0	0.0	0.0	0.0	40.0	0.0	0.0	0.0	0.0	48.0	0.0
7f73f09c34130d248a01544c6a6d312c	k__Bacteria; p__Firmicutes; c__Bacilli; o__Lactobacillales; f__Streptococcaceae; g__Streptococcus; s__	0.0	0.0	0.0	0.0	0.0	0.0	0.0	13.0	0.0	0.0	0.0	0.0	0.0	0.0	0.0	0.0	0.0	0.0	0.0	0.0	0.0	0.0	0.0	0.0	0.0	0.0	0.0	0.0	0.0	0.0	0.0	49.0	0.0	0.0	0.0	0.0	0.0	46.0	0.0	0.0	28.0	0.0	0.0	0.0	48.0	0.0	19.0	14.0
b632efa9f0291bb822cc68a9fcb5d47f	k__Bacteria; p__Firmicutes; c__Clostridia; o__Clostridiales; f__Ruminococcaceae; g__Oscillospira; s__	0.0	0.0	0.0	0.0	0.0	0.0	0.0	0.0	0.0	87.0	0.0	0.0	0.0	0.0	0.0	0.0	0.0	0.0	36.0	0.0	0.0	27.0	34.0	0.0	0.0	0.0	0.0	0.0	0.0	0.0	0.0	0.0	0.0	0.0	0.0	0.0	0.0	0.0	0.0	53.0	0.0	0.0	0.0	0.0	0.0	31.0	20.0	0.0
58894dccd2753fe6d729e5560e12af2d	k__Bacteria; p__Bacteroidetes; c__Bacteroidia; o__Bacteroidales; f__[Odoribacteraceae]; g__Odoribacter; s__	0.0	0.0	0.0	0.0	0.0	0.0	0.0	0.0	0.0	0.0	0.0	0.0	0.0	0.0	0.0	0.0	0.0	0.0	0.0	0.0	0.0	0.0	0.0	0.0	0.0	0.0	0.0	0.0	0.0	64.0	46.0	0.0	0.0	0.0	0.0	0.0	0.0	0.0	0.0	45.0	0.0	0.0	0.0	0.0	0.0	0.0	0.0	0.0
21c7be3d57accd347809caf5810ab48b	k__Bacteria; p__Firmicutes; c__Clostridia; o__Clostridiales; f__Lachnospiraceae; g__Dorea; s__formicigenerans	0.0	0.0	0.0	0.0	0.0	0.0	0.0	0.0	0.0	50.0	0.0	0.0	0.0	0.0	0.0	0.0	0.0	0.0	49.0	0.0	0.0	0.0	0.0	0.0	0.0	13.0	0.0	0.0	0.0	0.0	0.0	0.0	0.0	0.0	20.0	0.0	0.0	0.0	0.0	0.0	0.0	0.0	0.0	0.0	0.0	0.0	0.0	16.0
dd3d4971f45002f1ea448b59a3549f95	k__Bacteria; p__Firmicutes; c__Clostridia; o__Clostridiales; f__Ruminococcaceae; g__Faecalibacterium; s__prausnitzii	0.0	38.0	0.0	0.0	0.0	33.0	0.0	25.0	0.0	17.0	0.0	52.0	0.0	2.0	20.0	0.0	0.0	40.0	43.0	15.0	0.0	0.0	82.0	0.0	0.0	0.0	0.0	0.0	19.0	0.0	65.0	0.0	0.0	0.0	115.0	62.0	0.0	0.0	0.0	73.0	0.0	52.0	0.0	39.0	25.0	0.0	18.0	0.0
24521d703d664903309e91e447dcdf67	k__Bacteria; p__Firmicutes; c__Bacilli; o__Lactobacillales; f__Streptococcaceae; g__Streptococcus; s__	0.0	0.0	0.0	0.0	0.0	0.0	0.0	0.0	0.0	0.0	0.0	0.0	0.0	0.0	0.0	0.0	49.0	0.0	0.0	0.0	0.0	0.0	0.0	0.0	0.0	0.0	0.0	0.0	0.0	0.0	0.0	0.0	0.0	0.0	0.0	0.0	0.0	16.0	0.0	0.0	71.0	0.0	0.0	0.0	0.0	0.0	0.0	20.0
9bced7407fedf252682587b5db3fde5f	k__Bacteria; p__Bacteroidetes; c__Bacteroidia; o__Bacteroidales; f__Bacteroidaceae; g__Bacteroides; s__ovatus	0.0	0.0	0.0	0.0	0.0	0.0	14.0	0.0	0.0	0.0	0.0	0.0	0.0	0.0	0.0	9.0	0.0	0.0	0.0	0.0	0.0	6.0	0.0	0.0	0.0	0.0	0.0	0.0	0.0	0.0	0.0	0.0	0.0	0.0	0.0	0.0	0.0	0.0	0.0	0.0	0.0	0.0	0.0	0.0	19.0	0.0	0.0	0.0
ed51fcd29a44ca3564278e6b7bc7ef15	k__Bacteria; p__Firmicutes; c__Clostridia; o__Clostridiales; f__Ruminococcaceae	0.0	0.0	0.0	0.0	0.0	0.0	0.0	0.0	0.0	85.0	0.0	0.0	0.0	0.0	16.0	0.0	0.0	0.0	0.0	0.0	0.0	0.0	0.0	0.0	0.0	0.0	109.0	0.0	0.0	0.0	0.0	0.0	42.0	0.0	0.0	0.0	0.0	0.0	0.0	0.0	0.0	0.0	0.0	0.0	44.0	0.0	0.0	0.0
21a8281fbc387ab893a362be2abc674a	k__Bacteria; p__Firmicutes; c__Clostridia; o__Clostridiales; f__Clostridiaceae; g__Clostridium; s__celatum	0.0	0.0	15.0	33.0	284.0	50.0	0.0	146.0	0.0	0.0	0.0	0.0	0.0	0.0	51.0	0.0	0.0	21.0	0.0	0.0	0.0	0.0	0.0	26.0	0.0	0.0	60.0	87.0	0.0	0.0	9.0	0.0	0.0	0.0	169.0	0.0	45.0	22.0	0.0	0.0	63.0	0.0	0.0	0.0	44.0	0.0	0.0	119.0
2a306e605007f7aa90d494e892824141	k__Bacteria; p__Firmicutes; c__Clostridia; o__Clostridiales; f__Ruminococcaceae	0.0	0.0	0.0	0.0	0.0	0.0	0.0	0.0	0.0	0.0	0.0	0.0	0.0	0.0	0.0	0.0	0.0	0.0	0.0	0.0	0.0	0.0	0.0	0.0	0.0	0.0	0.0	0.0	0.0	0.0	0.0	0.0	0.0	0.0	30.0	0.0	0.0	0.0	0.0	0.0	0.0	0.0	0.0	0.0	0.0	0.0	0.0	26.0
f2d070f6434135042e20b16dc8d21d27	k__Bacteria; p__Bacteroidetes; c__Bacteroidia; o__Bacteroidales; f__Bacteroidaceae; g__Bacteroides; s__	0.0	13.0	0.0	0.0	0.0	0.0	201.0	0.0	0.0	329.0	0.0	0.0	0.0	0.0	122.0	0.0	0.0	34.0	0.0	0.0	0.0	0.0	0.0	39.0	592.0	0.0	99.0	121.0	111.0	610.0	0.0	19.0	87.0	0.0	103.0	292.0	257.0	40.0	0.0	0.0	0.0	32.0	0.0	14.0	0.0	0.0	0.0	0.0
aa3747b000dc4a839a998f36d1fc5b6b	k__Bacteria; p__Firmicutes; c__Clostridia; o__Clostridiales; f__Lachnospiraceae	0.0	0.0	0.0	0.0	0.0	0.0	52.0	0.0	0.0	0.0	0.0	80.0	0.0	0.0	34.0	18.0	31.0	0.0	0.0	0.0	0.0	0.0	0.0	35.0	0.0	33.0	0.0	45.0	0.0	73.0	28.0	0.0	0.0	0.0	151.0	0.0	25.0	0.0	0.0	0.0	0.0	47.0	26.0	0.0	87.0	0.0	0.0	49.0
0c2c3cdd6f32c36c4824c0c6ee45e032	k__Bacteria; p__Firmicutes; c__Clostridia; o__Clostridiales; f__Lachnospiraceae; g__Blautia; s__	0.0	0.0	0.0	0.0	0.0	0.0	0.0	0.0	0.0	0.0	0.0	0.0	0.0	0.0	0.0	0.0	0.0	0.0	0.0	0.0	0.0	0.0	0.0	0.0	0.0	0.0	0.0	0.0	0.0	0.0	0.0	0.0	0.0	0.0	57.0	0.0	0.0	0.0	0.0	0.0	0.0	0.0	0.0	0.0	0.0	0.0	22.0	0.0
9966cb0aa88d4f574f8fa347a7e598ae	k__Bacteria; p__Bacteroidetes; c__Bacteroidia; o__Bacteroidales; f__[Odoribacteraceae]; g__Butyricimonas; s__	0.0	0.0	0.0	0.0	0.0	0.0	0.0	19.0	0.0	0.0	0.0	34.0	0.0	0.0	0.0	0.0	0.0	0.0	4.0	0.0	0.0	0.0	0.0	0.0	0.0	0.0	0.0	0.0	63.0	0.0	0.0	0.0	16.0	31.0	29.0	34.0	17.0	33.0	36.0	0.0	0.0	0.0	13.0	26.0	0.0	0.0	0.0	27.0
609c3c9c545d4b471bf96e700440dbc8	k__Bacteria; p__Firmicutes; c__Clostridia; o__Clostridiales; f__Lachnospiraceae; g__[Ruminococcus]; s__torques	31.0	0.0	42.0	18.0	186.0	0.0	0.0	67.0	0.0	0.0	0.0	0.0	0.0	0.0	0.0	56.0	0.0	0.0	39.0	0.0	37.0	0.0	52.0	0.0	52.0	18.0	15.0	0.0	0.0	78.0	28.0	0.0	14.0	29.0	35.0	0.0	0.0	95.0	69.0	0.0	0.0	217.0	0.0	0.0	48.0	29.0	19.0	135.0
c2c14de60d6dca8e4d708c65ef598c97	k__Bacteria; p__Actinobacteria; c__Coriobacteriia; o__Coriobacteriales; f__Coriobacteriaceae; g__; s__	0.0	0.0	0.0	0.0	0.0	2.0	23.0	41.0	29.0	0.0	34.0	0.0	0.0	0.0	0.0	36.0	0.0	0.0	0.0	0.0	0.0	0.0	0.0	64.0	0.0	0.0	0.0	0.0	0.0	0.0	0.0	0.0	0.0	0.0	0.0	0.0	0.0	0.0	0.0	0.0	0.0	0.0	0.0	22.0	52.0	0.0	0.0	0.0
ec5f61bd67e3321506014cd9bdb87f76	k__Bacteria; p__Bacteroidetes; c__Bacteroidia; o__Bacteroidales; f__Prevotellaceae; g__Prevotella; s__	0.0	0.0	0.0	0.0	0.0	0.0	0.0	26.0	0.0	0.0	0.0	0.0	37.0	36.0	0.0	0.0	0.0	0.0	0.0	0.0	0.0	0.0	0.0	0.0	0.0	0.0	0.0	0.0	0.0	0.0	0.0	0.0	0.0	0.0	306.0	0.0	0.0	0.0	116.0	0.0	0.0	0.0	0.0	28.0	0.0	0.0	0.0	82.0
18ea6613a0c84ef2f190b9f4eb73f820	k__Bacteria; p__Cyanobacteria; c__4C0d-2; o__YS2; f__; g__; s__	0.0	29.0	0.0	0.0	0.0	0.0	0.0	0.0	0.0	0.0	0.0	48.0	0.0	0.0	0.0	0.0	0.0	0.0	0.0	28.0	86.0	0.0	0.0	0.0	0.0	0.0	0.0	0.0	0.0	0.0	0.0	0.0	0.0	0.0	187.0	61.0	0.0	0.0	0.0	0.0	0.0	19.0	0.0	0.0	0.0	0.0	0.0	0.0
00bc41e707812de80e50d61acae14499	k__Bacteria; p__Firmicutes; c__Clostridia; o__Clostridiales; f__Lachnospiraceae; g__Coprococcus; s__	0.0	0.0	0.0	11.0	15.0	0.0	6.0	0.0	0.0	0.0	0.0	21.0	43.0	0.0	81.0	16.0	18.0	0.0	0.0	0.0	0.0	0.0	0.0	34.0	0.0	6.0	0.0	66.0	0.0	0.0	0.0	44.0	0.0	0.0	0.0	0.0	0.0	0.0	0.0	0.0	0.0	0.0	0.0	6.0	36.0	0.0	0.0	0.0
cf62900de9038a6ccda349b822b93d38	k__Bacteria; p__Firmicutes; c__Clostridia; o__Clostridiales; f__Lachnospiraceae	0.0	0.0	0.0	44.0	0.0	0.0	33.0	28.0	0.0	0.0	0.0	75.0	0.0	27.0	40.0	18.0	22.0	0.0	83.0	32.0	0.0	0.0	0.0	46.0	0.0	29.0	79.0	0.0	0.0	50.0	35.0	20.0	0.0	103.0	137.0	42.0	0.0	45.0	31.0	88.0	0.0	0.0	0.0	38.0	0.0	53.0	31.0	0.0
bfbdacc5bb9c15709a5c5a8cfdb1df6e	k__Bacteria; p__Firmicutes; c__Clostridia; o__Clostridiales; f__Lachnospiraceae; g__Blautia; s__	34.0	22.0	401.0	47.0	0.0	24.0	35.0	69.0	37.0	46.0	41.0	48.0	35.0	29.0	24.0	85.0	61.0	59.0	68.0	39.0	73.0	39.0	38.0	85.0	47.0	70.0	64.0	67.0	54.0	61.0	69.0	0.0	0.0	53.0	114.0	60.0	0.0	70.0	47.0	40.0	88.0	0.0	65.0	0.0	63.0	126.0	26.0	32.0
7a4687c527818f0f91998ccc1a617bd0	k__Bacteria; p__Firmicutes; c__Clostridia; o__Clostridiales; f__Lachnospiraceae; g__Blautia; s__	0.0	0.0	0.0	0.0	0.0	35.0	0.0	0.0	0.0	0.0	0.0	0.0	0.0	0.0	0.0	0.0	0.0	0.0	0.0	0.0	0.0	0.0	0.0	0.0	0.0	0.0	26.0	0.0	0.0	0.0	0.0	0.0	0.0	0.0	0.0	31.0	28.0	0.0	0.0	28.0	0.0	0.0	0.0	0.0	49.0	0.0	0.0	20.0
adb8969ca392a9914ff492c05489011e	k__Bacteria; p__Bacteroidetes; c__Bacteroidia; o__Bacteroidales; f__Bacteroidaceae; g__Bacteroides; s__	0.0	0.0	0.0	0.0	0.0	0.0	0.0	0.0	0.0	0.0	0.0	0.0	27.0	0.0	0.0	0.0	0.0	0.0	0.0	0.0	0.0	0.0	0.0	0.0	0.0	217.0	26.0	0.0	0.0	0.0	0.0	0.0	0.0	0.0	0.0	0.0	0.0	398.0	0.0	0.0	0.0	0.0	0.0	0.0	0.0	0.0	0.0	0.0
00515ca86f15d63c6b8b7b6882b6a53e	k__Bacteria; p__Firmicutes; c__Clostridia; o__Clostridiales; f__Lachnospiraceae; g__[Ruminococcus]; s__	0.0	0.0	0.0	0.0	79.0	0.0	0.0	0.0	46.0	0.0	0.0	0.0	0.0	0.0	0.0	48.0	0.0	0.0	0.0	0.0	0.0	0.0	0.0	0.0	0.0	0.0	0.0	0.0	0.0	0.0	0.0	0.0	0.0	0.0	0.0	0.0	0.0	0.0	0.0	0.0	39.0	0.0	0.0	0.0	0.0	0.0	0.0	0.0
c44d18ba084f32eb9921e85b5beec88e	k__Bacteria; p__Firmicutes; c__Bacilli; o__Lactobacillales; f__Streptococcaceae; g__Streptococcus	0.0	0.0	21.0	0.0	42.0	0.0	0.0	0.0	25.0	0.0	0.0	0.0	0.0	0.0	0.0	0.0	0.0	0.0	0.0	0.0	0.0	0.0	0.0	0.0	0.0	0.0	0.0	0.0	0.0	0.0	0.0	25.0	0.0	0.0	0.0	0.0	0.0	18.0	0.0	0.0	32.0	0.0	0.0	0.0	0.0	0.0	0.0	9.0
35414e41cf76fb798564e1e881f6d5cd	k__Bacteria; p__Firmicutes; c__Clostridia; o__Clostridiales; f__Lachnospiraceae	0.0	0.0	0.0	0.0	0.0	0.0	0.0	0.0	0.0	0.0	0.0	0.0	0.0	0.0	73.0	0.0	28.0	101.0	0.0	0.0	0.0	0.0	0.0	0.0	0.0	0.0	0.0	0.0	0.0	0.0	0.0	0.0	0.0	0.0	41.0	0.0	0.0	0.0	0.0	0.0	0.0	0.0	0.0	0.0	0.0	0.0	0.0	27.0
12d6257f8cf3a52ed2418d13816025da	k__Bacteria; p__Firmicutes; c__Clostridia; o__Clostridiales; f__Ruminococcaceae; g__Oscillospira; s__	0.0	0.0	0.0	0.0	20.0	0.0	0.0	0.0	0.0	0.0	0.0	0.0	0.0	0.0	18.0	0.0	0.0	0.0	0.0	0.0	0.0	0.0	0.0	0.0	0.0	0.0	0.0	0.0	0.0	0.0	44.0	0.0	0.0	0.0	0.0	0.0	0.0	0.0	0.0	0.0	0.0	0.0	0.0	0.0	0.0	0.0	0.0	0.0
4634deb16da8673db77cd89fabfa7ab4	k__Bacteria; p__Firmicutes; c__Clostridia; o__Clostridiales; f__Lachnospiraceae; g__; s__	0.0	0.0	0.0	0.0	0.0	0.0	0.0	0.0	0.0	0.0	0.0	0.0	0.0	0.0	0.0	0.0	0.0	0.0	0.0	0.0	27.0	21.0	0.0	22.0	0.0	0.0	0.0	0.0	0.0	0.0	0.0	0.0	0.0	0.0	35.0	21.0	0.0	0.0	0.0	0.0	0.0	0.0	0.0	0.0	0.0	0.0	0.0	25.0
d56091302cfc724655904f6437603cc3	k__Bacteria; p__Firmicutes; c__Clostridia; o__Clostridiales; f__Lachnospiraceae; g__Clostridium; s__hathewayi	0.0	0.0	0.0	0.0	281.0	0.0	0.0	0.0	0.0	0.0	0.0	0.0	0.0	0.0	0.0	30.0	0.0	0.0	0.0	0.0	0.0	0.0	0.0	0.0	42.0	0.0	0.0	0.0	0.0	0.0	0.0	0.0	63.0	0.0	0.0	0.0	0.0	0.0	0.0	0.0	0.0	21.0	0.0	0.0	0.0	0.0	0.0	19.0
5a9a3cf62919198ed02f97c74b496025	k__Bacteria; p__Firmicutes; c__Clostridia; o__Clostridiales; f__Ruminococcaceae	0.0	0.0	0.0	0.0	84.0	0.0	73.0	27.0	0.0	29.0	0.0	0.0	20.0	33.0	0.0	26.0	0.0	0.0	72.0	0.0	0.0	0.0	70.0	0.0	22.0	50.0	0.0	0.0	25.0	0.0	0.0	47.0	43.0	0.0	31.0	0.0	23.0	75.0	0.0	0.0	26.0	177.0	30.0	0.0	0.0	40.0	0.0	27.0
5a636e0a48795759bca165b9ed9d5710	k__Bacteria; p__Firmicutes; c__Clostridia; o__Clostridiales; f__Ruminococcaceae; g__Ruminococcus; s__	0.0	0.0	0.0	0.0	0.0	0.0	0.0	0.0	0.0	0.0	0.0	0.0	0.0	0.0	0.0	0.0	0.0	0.0	0.0	0.0	0.0	0.0	0.0	0.0	0.0	0.0	0.0	0.0	0.0	0.0	0.0	0.0	0.0	0.0	0.0	8.0	0.0	20.0	0.0	0.0	0.0	34.0	0.0	0.0	0.0	0.0	0.0	0.0
bd6fc986fe1cc835e4f58ee62e459a48	k__Bacteria; p__Firmicutes; c__Clostridia; o__Clostridiales; f__Christensenellaceae; g__; s__	0.0	55.0	0.0	0.0	0.0	0.0	0.0	0.0	0.0	0.0	0.0	0.0	0.0	0.0	20.0	0.0	0.0	0.0	0.0	0.0	0.0	0.0	0.0	66.0	33.0	0.0	0.0	0.0	0.0	26.0	0.0	0.0	0.0	0.0	41.0	20.0	39.0	0.0	0.0	0.0	0.0	36.0	0.0	0.0	36.0	0.0	0.0	0.0
e980815408dc13e8444f1622ba5d30e0	k__Bacteria; p__Firmicutes; c__Clostridia; o__Clostridiales; f__Ruminococcaceae; g__; s__	0.0	98.0	0.0	0.0	0.0	0.0	0.0	0.0	0.0	0.0	48.0	0.0	0.0	19.0	0.0	0.0	0.0	0.0	0.0	0.0	0.0	0.0	0.0	0.0	0.0	0.0	0.0	0.0	0.0	0.0	0.0	0.0	28.0	34.0	32.0	61.0	0.0	24.0	0.0	0.0	0.0	36.0	0.0	0.0	0.0	0.0	0.0	0.0
42a8227ccd3764ba9c5f0e54088b5f0a	k__Bacteria; p__Firmicutes; c__Clostridia; o__Clostridiales; f__Ruminococcaceae; g__Faecalibacterium; s__prausnitzii	0.0	38.0	0.0	0.0	0.0	0.0	0.0	0.0	0.0	20.0	0.0	50.0	0.0	0.0	22.0	0.0	0.0	11.0	0.0	24.0	0.0	0.0	42.0	0.0	0.0	0.0	0.0	0.0	42.0	0.0	41.0	0.0	0.0	0.0	42.0	23.0	0.0	0.0	0.0	34.0	0.0	0.0	0.0	20.0	0.0	0.0	0.0	0.0
e5248da61592a398c6b10aa7d3b2ef1d	k__Bacteria; p__Firmicutes; c__Clostridia; o__SHA-98; f__; g__; s__	0.0	0.0	0.0	0.0	0.0	0.0	0.0	0.0	0.0	0.0	0.0	17.0	0.0	0.0	0.0	0.0	0.0	0.0	0.0	0.0	0.0	0.0	0.0	0.0	0.0	0.0	16.0	0.0	0.0	0.0	0.0	0.0	0.0	0.0	45.0	25.0	0.0	42.0	0.0	0.0	0.0	0.0	0.0	0.0	0.0	0.0	32.0	16.0
ce1045f67f68049a1a1db9fac3de0655	k__Bacteria; p__Firmicutes; c__Clostridia; o__Clostridiales; f__Ruminococcaceae	0.0	0.0	0.0	0.0	0.0	0.0	0.0	0.0	0.0	0.0	0.0	0.0	0.0	51.0	0.0	19.0	0.0	0.0	25.0	0.0	0.0	0.0	0.0	0.0	0.0	0.0	0.0	0.0	0.0	0.0	0.0	0.0	0.0	0.0	62.0	0.0	0.0	0.0	0.0	0.0	0.0	0.0	0.0	0.0	0.0	0.0	0.0	0.0
27344b5d44c865526386e0ee32dfdfcb	k__Bacteria; p__Bacteroidetes; c__Bacteroidia; o__Bacteroidales; f__Bacteroidaceae; g__Bacteroides; s__uniformis	14.0	138.0	0.0	87.0	1777.0	20.0	20.0	24.0	258.0	339.0	103.0	0.0	0.0	0.0	79.0	65.0	253.0	45.0	0.0	125.0	107.0	71.0	0.0	254.0	343.0	417.0	22.0	0.0	197.0	338.0	0.0	0.0	62.0	71.0	0.0	235.0	380.0	71.0	0.0	204.0	0.0	155.0	152.0	0.0	174.0	0.0	65.0	156.0
d338518d0b3f02fd26445f8145f7d2c6	k__Bacteria; p__Firmicutes; c__Bacilli; o__Lactobacillales; f__Streptococcaceae; g__Streptococcus	0.0	0.0	42.0	0.0	0.0	18.0	0.0	43.0	28.0	0.0	0.0	0.0	0.0	0.0	0.0	0.0	0.0	0.0	0.0	0.0	0.0	0.0	0.0	0.0	0.0	0.0	0.0	0.0	0.0	0.0	19.0	34.0	0.0	0.0	0.0	21.0	0.0	20.0	0.0	0.0	21.0	0.0	0.0	0.0	0.0	0.0	0.0	15.0
30a77a47cae8ac716a989a90e2ca2b57	k__Bacteria; p__Bacteroidetes; c__Bacteroidia; o__Bacteroidales; f__Rikenellaceae; g__; s__	0.0	0.0	0.0	0.0	48.0	0.0	0.0	0.0	0.0	31.0	0.0	32.0	0.0	0.0	0.0	404.0	46.0	0.0	0.0	0.0	0.0	0.0	0.0	0.0	106.0	33.0	0.0	0.0	0.0	19.0	0.0	0.0	0.0	0.0	0.0	0.0	0.0	0.0	0.0	0.0	0.0	0.0	0.0	0.0	0.0	0.0	0.0	0.0
d6f2b517ac537e75aa80cc69fa74cbb8	k__Bacteria; p__Firmicutes; c__Clostridia; o__Clostridiales; f__; g__; s__	0.0	0.0	0.0	0.0	0.0	0.0	0.0	0.0	0.0	0.0	0.0	22.0	0.0	0.0	0.0	0.0	0.0	0.0	0.0	0.0	0.0	0.0	0.0	0.0	0.0	0.0	0.0	0.0	0.0	0.0	0.0	65.0	0.0	0.0	0.0	0.0	0.0	0.0	0.0	0.0	0.0	0.0	0.0	27.0	14.0	0.0	0.0	0.0
958d30ed21999590ca2eb2efaaf6ce41	k__Bacteria; p__Firmicutes; c__Clostridia; o__Clostridiales; f__Christensenellaceae; g__; s__	0.0	22.0	0.0	0.0	17.0	42.0	0.0	0.0	0.0	0.0	40.0	0.0	0.0	0.0	0.0	0.0	0.0	0.0	0.0	0.0	0.0	0.0	0.0	0.0	0.0	0.0	0.0	0.0	0.0	0.0	0.0	0.0	23.0	40.0	45.0	53.0	0.0	0.0	0.0	0.0	0.0	61.0	0.0	0.0	0.0	0.0	0.0	0.0
36980f13baeac86e498c81c07c490a02	k__Bacteria; p__Proteobacteria; c__Gammaproteobacteria; o__Pasteurellales; f__Pasteurellaceae; g__Haemophilus; s__parainfluenzae	6.0	0.0	0.0	0.0	0.0	0.0	5.0	7.0	32.0	0.0	0.0	0.0	0.0	0.0	0.0	0.0	0.0	0.0	0.0	0.0	0.0	0.0	0.0	0.0	0.0	0.0	0.0	0.0	0.0	0.0	0.0	7.0	0.0	0.0	0.0	0.0	3.0	0.0	0.0	0.0	0.0	0.0	0.0	0.0	10.0	0.0	0.0	9.0
feec23bcec305e54d4f98a7c24cd7d2b	k__Bacteria; p__Firmicutes; c__Clostridia; o__Clostridiales; f__Lachnospiraceae; g__Anaerostipes; s__	0.0	0.0	0.0	0.0	0.0	0.0	0.0	50.0	0.0	0.0	0.0	0.0	0.0	0.0	0.0	0.0	0.0	0.0	0.0	0.0	0.0	0.0	0.0	0.0	0.0	0.0	0.0	0.0	0.0	0.0	28.0	0.0	0.0	0.0	24.0	0.0	0.0	0.0	0.0	0.0	0.0	0.0	17.0	0.0	36.0	0.0	0.0	0.0
4206598d10367c9acef8cc02761517b2	k__Bacteria; p__Firmicutes; c__Clostridia; o__Clostridiales; f__[Mogibacteriaceae]; g__; s__	0.0	0.0	0.0	0.0	0.0	0.0	61.0	0.0	0.0	46.0	0.0	0.0	0.0	0.0	27.0	40.0	0.0	0.0	0.0	0.0	0.0	0.0	50.0	0.0	0.0	0.0	0.0	0.0	0.0	39.0	52.0	26.0	0.0	0.0	42.0	0.0	19.0	15.0	0.0	0.0	0.0	0.0	30.0	34.0	0.0	57.0	0.0	0.0
4b25baedc7e19f65b7463c613a998e56	k__Bacteria; p__Firmicutes; c__Clostridia; o__Clostridiales; f__Ruminococcaceae	0.0	0.0	0.0	0.0	0.0	0.0	0.0	25.0	0.0	0.0	0.0	0.0	0.0	0.0	0.0	0.0	60.0	0.0	0.0	0.0	0.0	0.0	0.0	0.0	0.0	86.0	0.0	0.0	0.0	0.0	0.0	0.0	0.0	0.0	46.0	0.0	0.0	0.0	22.0	0.0	0.0	0.0	0.0	66.0	0.0	0.0	0.0	0.0
df54c88119c45c259e4f9908372fa1c2	k__Bacteria; p__Firmicutes; c__Clostridia; o__Clostridiales; f__Veillonellaceae; g__Veillonella; s__dispar	0.0	0.0	0.0	0.0	0.0	0.0	19.0	0.0	41.0	0.0	0.0	0.0	0.0	0.0	0.0	0.0	0.0	0.0	0.0	0.0	0.0	0.0	0.0	0.0	0.0	0.0	0.0	29.0	0.0	0.0	0.0	0.0	0.0	0.0	0.0	0.0	0.0	0.0	0.0	0.0	47.0	0.0	0.0	0.0	0.0	0.0	0.0	0.0
c0d24dd4f2152c1d59172d74d7f85ad6	k__Bacteria; p__Bacteroidetes; c__Bacteroidia; o__Bacteroidales; f__Bacteroidaceae; g__Bacteroides; s__	0.0	0.0	0.0	0.0	0.0	0.0	0.0	0.0	0.0	0.0	0.0	0.0	0.0	16.0	0.0	0.0	0.0	0.0	0.0	0.0	0.0	0.0	0.0	0.0	0.0	0.0	0.0	0.0	0.0	32.0	0.0	0.0	49.0	0.0	0.0	30.0	0.0	784.0	0.0	0.0	0.0	0.0	0.0	0.0	0.0	0.0	0.0	0.0
4402503e0097f43cd7e21ab77f2cd152	k__Bacteria; p__Firmicutes; c__Clostridia; o__Clostridiales; f__Ruminococcaceae; g__Gemmiger; s__formicilis	0.0	0.0	0.0	0.0	0.0	17.0	0.0	0.0	0.0	0.0	0.0	49.0	0.0	38.0	0.0	0.0	33.0	0.0	17.0	14.0	0.0	0.0	0.0	0.0	0.0	62.0	0.0	0.0	46.0	44.0	21.0	0.0	0.0	72.0	148.0	54.0	46.0	21.0	0.0	115.0	0.0	0.0	0.0	70.0	0.0	0.0	46.0	0.0
bc924b376a458f31b5b20adc1e0049f2	k__Bacteria; p__Firmicutes; c__Clostridia; o__Clostridiales; f__Lachnospiraceae; g__Blautia; s__	0.0	0.0	0.0	0.0	0.0	0.0	0.0	0.0	0.0	0.0	0.0	0.0	0.0	0.0	0.0	0.0	0.0	0.0	0.0	0.0	0.0	19.0	0.0	0.0	0.0	0.0	0.0	0.0	0.0	0.0	16.0	72.0	0.0	0.0	15.0	0.0	18.0	0.0	0.0	0.0	9.0	26.0	0.0	0.0	0.0	0.0	0.0	20.0
1069b696c8319a4aa94ba98d783bc475	k__Bacteria; p__Firmicutes; c__Clostridia; o__Clostridiales; f__; g__; s__	0.0	0.0	0.0	0.0	0.0	43.0	0.0	0.0	0.0	0.0	0.0	39.0	0.0	0.0	0.0	0.0	0.0	48.0	0.0	61.0	0.0	0.0	0.0	0.0	0.0	0.0	101.0	0.0	0.0	0.0	0.0	0.0	0.0	0.0	0.0	0.0	0.0	0.0	146.0	0.0	0.0	0.0	0.0	0.0	0.0	0.0	73.0	0.0
af188edd7898e2a2488e2ac0bb5754c0	k__Bacteria; p__Synergistetes; c__Synergistia; o__Synergistales; f__Dethiosulfovibrionaceae; g__Pyramidobacter; s__piscolens	0.0	0.0	0.0	0.0	0.0	0.0	0.0	0.0	0.0	0.0	0.0	0.0	0.0	0.0	0.0	0.0	0.0	0.0	0.0	0.0	0.0	0.0	0.0	0.0	0.0	0.0	0.0	0.0	0.0	0.0	0.0	50.0	0.0	37.0	16.0	0.0	0.0	0.0	0.0	0.0	0.0	0.0	0.0	0.0	0.0	39.0	24.0	0.0
557730296c9ff8394732518bcee9cae1	k__Bacteria; p__Bacteroidetes; c__Bacteroidia; o__Bacteroidales; f__Bacteroidaceae; g__Bacteroides; s__	8.0	94.0	0.0	431.0	0.0	0.0	0.0	22.0	353.0	34.0	56.0	0.0	0.0	0.0	288.0	611.0	16.0	0.0	0.0	0.0	12.0	0.0	0.0	164.0	1416.0	252.0	0.0	0.0	0.0	0.0	0.0	34.0	32.0	82.0	0.0	0.0	0.0	28.0	48.0	0.0	0.0	0.0	832.0	0.0	108.0	233.0	0.0	48.0
43af1d008e29645855681dd3947406cb	k__Bacteria; p__Firmicutes; c__Clostridia; o__Clostridiales; f__Lachnospiraceae	0.0	0.0	0.0	0.0	284.0	0.0	0.0	0.0	0.0	0.0	0.0	0.0	0.0	0.0	0.0	0.0	0.0	0.0	0.0	0.0	0.0	0.0	0.0	0.0	0.0	0.0	0.0	0.0	0.0	0.0	0.0	0.0	0.0	45.0	0.0	0.0	13.0	0.0	0.0	0.0	0.0	24.0	0.0	0.0	0.0	0.0	0.0	12.0
80fb63689f37c7827d4a12b4bf7c9396	k__Bacteria; p__Firmicutes; c__Clostridia; o__Clostridiales	0.0	0.0	0.0	0.0	0.0	0.0	0.0	0.0	0.0	24.0	0.0	0.0	0.0	0.0	49.0	76.0	13.0	0.0	0.0	0.0	60.0	107.0	62.0	45.0	101.0	80.0	27.0	0.0	0.0	72.0	36.0	42.0	0.0	0.0	0.0	53.0	34.0	0.0	80.0	0.0	0.0	45.0	21.0	42.0	0.0	0.0	0.0	79.0
98d6b522f23a84fcbc18de409d99eb22	k__Bacteria; p__Firmicutes; c__Clostridia; o__Clostridiales; f__Lachnospiraceae; g__Dorea; s__formicigenerans	0.0	0.0	0.0	0.0	0.0	0.0	0.0	0.0	0.0	0.0	0.0	0.0	0.0	0.0	0.0	0.0	0.0	0.0	0.0	0.0	0.0	0.0	0.0	0.0	0.0	0.0	0.0	0.0	0.0	0.0	0.0	0.0	0.0	0.0	29.0	0.0	0.0	0.0	0.0	0.0	0.0	0.0	42.0	0.0	0.0	0.0	0.0	16.0
2f0d6a11d4d0ca62851aad752d1bd068	k__Bacteria; p__Firmicutes; c__Clostridia; o__Clostridiales; f__Ruminococcaceae	0.0	0.0	0.0	0.0	0.0	60.0	0.0	0.0	0.0	16.0	0.0	0.0	0.0	0.0	0.0	0.0	0.0	0.0	58.0	0.0	0.0	0.0	0.0	0.0	0.0	0.0	0.0	0.0	0.0	0.0	0.0	0.0	0.0	0.0	43.0	0.0	47.0	0.0	0.0	0.0	0.0	0.0	0.0	0.0	0.0	0.0	0.0	0.0
a1f2f2066edf48920fa48e1491ca6843	k__Bacteria; p__Bacteroidetes; c__Bacteroidia; o__Bacteroidales; f__[Barnesiellaceae]; g__; s__	0.0	0.0	0.0	0.0	0.0	0.0	0.0	0.0	0.0	0.0	0.0	0.0	54.0	0.0	0.0	0.0	0.0	0.0	0.0	0.0	0.0	0.0	0.0	0.0	0.0	77.0	0.0	0.0	0.0	0.0	0.0	0.0	0.0	49.0	0.0	35.0	55.0	66.0	0.0	0.0	0.0	0.0	0.0	0.0	0.0	0.0	0.0	40.0
22e5a9dc34857f35b1d1604527881516	k__Bacteria; p__Bacteroidetes; c__Bacteroidia; o__Bacteroidales; f__Rikenellaceae	0.0	0.0	0.0	0.0	41.0	0.0	0.0	0.0	0.0	0.0	0.0	0.0	0.0	38.0	0.0	0.0	0.0	0.0	0.0	0.0	0.0	0.0	0.0	0.0	0.0	33.0	0.0	0.0	0.0	0.0	0.0	0.0	27.0	29.0	41.0	0.0	22.0	0.0	0.0	0.0	0.0	53.0	19.0	0.0	0.0	0.0	0.0	0.0
6cd1ae2540b30a270522b160966d98bc	k__Bacteria; p__Firmicutes; c__Clostridia; o__Clostridiales; f__Lachnospiraceae; g__Coprococcus; s__	0.0	0.0	0.0	0.0	16.0	0.0	28.0	0.0	0.0	0.0	0.0	0.0	0.0	0.0	0.0	0.0	0.0	0.0	17.0	0.0	0.0	0.0	0.0	0.0	0.0	28.0	0.0	0.0	0.0	0.0	0.0	0.0	0.0	0.0	0.0	0.0	0.0	0.0	0.0	0.0	0.0	0.0	0.0	17.0	0.0	26.0	0.0	0.0
1a7c38c1aacea7f795efcbc01f4f11b3	k__Bacteria; p__Proteobacteria; c__Betaproteobacteria; o__Burkholderiales; f__Alcaligenaceae; g__Sutterella; s__	0.0	0.0	0.0	0.0	0.0	0.0	0.0	0.0	0.0	24.0	0.0	0.0	0.0	0.0	0.0	0.0	0.0	0.0	0.0	0.0	0.0	0.0	0.0	83.0	0.0	0.0	48.0	0.0	0.0	0.0	0.0	0.0	0.0	0.0	35.0	0.0	60.0	0.0	9.0	40.0	0.0	0.0	16.0	0.0	35.0	0.0	0.0	0.0
e4a044011889dafb85a345b061c60b58	k__Bacteria; p__Proteobacteria; c__Betaproteobacteria; o__Burkholderiales; f__Alcaligenaceae; g__Sutterella; s__	0.0	96.0	0.0	0.0	0.0	0.0	0.0	0.0	0.0	40.0	0.0	0.0	0.0	29.0	0.0	0.0	29.0	0.0	0.0	0.0	0.0	0.0	0.0	0.0	0.0	0.0	0.0	0.0	0.0	0.0	0.0	0.0	0.0	0.0	310.0	0.0	0.0	0.0	0.0	0.0	0.0	0.0	0.0	0.0	0.0	0.0	0.0	0.0
5227a447055f6e583679c42695dc202d	k__Bacteria; p__Bacteroidetes; c__Bacteroidia; o__Bacteroidales; f__Rikenellaceae; g__Alistipes; s__finegoldii	0.0	0.0	0.0	0.0	0.0	0.0	0.0	0.0	0.0	0.0	48.0	0.0	0.0	0.0	0.0	0.0	0.0	0.0	0.0	0.0	0.0	0.0	0.0	0.0	0.0	0.0	0.0	0.0	0.0	0.0	52.0	24.0	0.0	25.0	58.0	0.0	60.0	147.0	0.0	0.0	0.0	0.0	0.0	0.0	0.0	0.0	0.0	0.0
d880f50f2b5c9960fbf06b7219a3840e	k__Bacteria; p__Firmicutes; c__Erysipelotrichi; o__Erysipelotrichales; f__Erysipelotrichaceae; g__Clostridium; s__saccharogumia	0.0	0.0	0.0	0.0	0.0	0.0	0.0	0.0	0.0	0.0	0.0	0.0	0.0	0.0	0.0	0.0	0.0	0.0	0.0	23.0	0.0	0.0	0.0	0.0	0.0	0.0	0.0	0.0	0.0	0.0	48.0	0.0	0.0	0.0	0.0	32.0	32.0	0.0	0.0	0.0	0.0	45.0	0.0	0.0	0.0	0.0	0.0	0.0
508236ff60373415b3d7cf59f14fa1ff	k__Bacteria; p__Bacteroidetes; c__Bacteroidia; o__Bacteroidales; f__Bacteroidaceae; g__Bacteroides; s__plebeius	0.0	0.0	0.0	0.0	0.0	0.0	0.0	50.0	0.0	0.0	27.0	0.0	201.0	0.0	0.0	0.0	0.0	59.0	0.0	0.0	0.0	0.0	0.0	0.0	0.0	0.0	0.0	0.0	0.0	0.0	0.0	0.0	0.0	0.0	0.0	0.0	0.0	0.0	6.0	0.0	0.0	0.0	0.0	0.0	0.0	0.0	39.0	0.0
8a37c61314282fc24f2857680dd440b5	k__Bacteria; p__Firmicutes; c__Clostridia; o__Clostridiales; f__Ruminococcaceae; g__Oscillospira; s__	75.0	47.0	0.0	0.0	0.0	17.0	0.0	0.0	0.0	69.0	38.0	25.0	0.0	7.0	19.0	32.0	0.0	0.0	0.0	0.0	0.0	0.0	0.0	0.0	0.0	0.0	16.0	0.0	24.0	0.0	0.0	30.0	0.0	51.0	111.0	112.0	39.0	0.0	0.0	0.0	0.0	0.0	19.0	84.0	70.0	0.0	36.0	2.0
663f4799aabe8f7c3ad52f8f0cf5be87	k__Bacteria; p__Firmicutes; c__Bacilli; o__Turicibacterales; f__Turicibacteraceae; g__Turicibacter; s__	0.0	0.0	0.0	0.0	49.0	0.0	0.0	0.0	26.0	0.0	0.0	0.0	0.0	0.0	0.0	0.0	0.0	31.0	0.0	0.0	0.0	0.0	0.0	0.0	0.0	0.0	0.0	30.0	0.0	0.0	0.0	0.0	0.0	0.0	64.0	0.0	0.0	0.0	0.0	0.0	6.0	0.0	0.0	0.0	0.0	0.0	0.0	12.0
bbdf4a13385f4e1d7fc1adb8c1597ada	k__Bacteria; p__Firmicutes; c__Clostridia; o__Clostridiales; f__; g__; s__	0.0	0.0	0.0	0.0	0.0	0.0	0.0	0.0	0.0	0.0	0.0	0.0	0.0	0.0	0.0	30.0	0.0	0.0	53.0	0.0	0.0	0.0	31.0	0.0	0.0	19.0	0.0	0.0	0.0	0.0	0.0	0.0	0.0	0.0	0.0	35.0	18.0	25.0	0.0	0.0	0.0	0.0	0.0	0.0	0.0	0.0	0.0	0.0
18b1af053345ae302ef5061fdbf00886	k__Bacteria; p__Firmicutes; c__Clostridia; o__Clostridiales; f__Ruminococcaceae; g__Oscillospira; s__	0.0	0.0	0.0	0.0	0.0	0.0	0.0	0.0	0.0	0.0	0.0	0.0	0.0	0.0	0.0	0.0	0.0	0.0	0.0	0.0	0.0	0.0	0.0	0.0	0.0	30.0	0.0	0.0	0.0	0.0	0.0	0.0	0.0	0.0	0.0	0.0	0.0	0.0	0.0	0.0	0.0	0.0	53.0	0.0	27.0	0.0	0.0	26.0
59a1160c4c6d475919ae38eb759421f2	k__Bacteria; p__Firmicutes; c__Clostridia; o__Clostridiales; f__Lachnospiraceae; g__Coprococcus; s__	0.0	0.0	57.0	0.0	0.0	28.0	4.0	24.0	26.0	59.0	0.0	33.0	24.0	25.0	11.0	0.0	18.0	0.0	70.0	47.0	35.0	0.0	20.0	18.0	14.0	29.0	23.0	55.0	0.0	0.0	0.0	0.0	0.0	0.0	97.0	0.0	25.0	32.0	0.0	0.0	0.0	19.0	14.0	0.0	0.0	53.0	11.0	19.0
ef459aec8014102e095ddff3d2d1efa2	k__Bacteria; p__Bacteroidetes; c__Bacteroidia; o__Bacteroidales; f__[Paraprevotellaceae]; g__Paraprevotella; s__	0.0	0.0	0.0	0.0	0.0	22.0	0.0	0.0	0.0	0.0	0.0	47.0	0.0	0.0	61.0	0.0	0.0	0.0	0.0	0.0	0.0	30.0	0.0	244.0	0.0	162.0	0.0	0.0	0.0	0.0	0.0	0.0	0.0	0.0	0.0	358.0	408.0	25.0	0.0	148.0	0.0	0.0	0.0	23.0	0.0	0.0	0.0	0.0
128c888b9df79c86b0efa4109bbe176e	k__Bacteria; p__Bacteroidetes; c__Bacteroidia; o__Bacteroidales; f__Bacteroidaceae; g__Bacteroides; s__	0.0	20.0	0.0	0.0	0.0	0.0	0.0	0.0	0.0	0.0	13.0	0.0	0.0	0.0	113.0	0.0	24.0	0.0	22.0	0.0	0.0	0.0	0.0	0.0	0.0	0.0	0.0	0.0	0.0	0.0	0.0	0.0	124.0	0.0	0.0	0.0	0.0	0.0	19.0	0.0	0.0	18.0	0.0	0.0	58.0	0.0	0.0	0.0
25bb59aaad30b452372154974e56c230	k__Bacteria; p__Firmicutes; c__Clostridia; o__Clostridiales; f__Ruminococcaceae	0.0	0.0	0.0	0.0	0.0	0.0	0.0	0.0	0.0	0.0	0.0	0.0	0.0	0.0	0.0	0.0	8.0	0.0	0.0	0.0	0.0	0.0	0.0	0.0	0.0	0.0	0.0	0.0	0.0	0.0	0.0	0.0	0.0	0.0	0.0	14.0	0.0	0.0	0.0	0.0	0.0	0.0	0.0	0.0	0.0	0.0	0.0	27.0
b5a57862dbcc411be89382860f0f388b	k__Bacteria; p__Firmicutes; c__Bacilli; o__Lactobacillales; f__Streptococcaceae; g__Streptococcus	0.0	0.0	12.0	0.0	0.0	0.0	0.0	0.0	9.0	0.0	0.0	0.0	0.0	0.0	0.0	0.0	0.0	0.0	0.0	0.0	0.0	0.0	29.0	0.0	0.0	0.0	0.0	0.0	0.0	0.0	0.0	0.0	0.0	0.0	0.0	0.0	0.0	2.0	0.0	0.0	12.0	0.0	0.0	0.0	0.0	0.0	0.0	8.0
8eaae37f91568db5f66c37ffa235e4b2	k__Bacteria; p__Firmicutes; c__Clostridia; o__Clostridiales; f__Ruminococcaceae; g__Oscillospira; s__	0.0	0.0	0.0	0.0	0.0	0.0	65.0	0.0	0.0	0.0	0.0	0.0	0.0	0.0	0.0	32.0	0.0	0.0	12.0	0.0	0.0	0.0	0.0	21.0	0.0	70.0	0.0	0.0	8.0	29.0	0.0	0.0	0.0	0.0	0.0	10.0	0.0	0.0	0.0	0.0	0.0	0.0	0.0	0.0	0.0	0.0	20.0	48.0
6ab25a23bad558827b434ceb9063b49a	k__Bacteria; p__Proteobacteria; c__Alphaproteobacteria; o__RF32; f__; g__; s__	0.0	0.0	0.0	0.0	0.0	6.0	0.0	0.0	0.0	0.0	0.0	59.0	0.0	0.0	0.0	0.0	0.0	0.0	0.0	0.0	0.0	0.0	0.0	0.0	62.0	0.0	0.0	0.0	0.0	0.0	0.0	0.0	0.0	0.0	32.0	0.0	0.0	0.0	55.0	0.0	0.0	0.0	0.0	25.0	0.0	0.0	0.0	0.0
aa5a3e4b46dd8011988183a475554077	k__Bacteria; p__Firmicutes; c__Clostridia; o__Clostridiales; f__Veillonellaceae; g__Veillonella	0.0	0.0	0.0	0.0	0.0	0.0	0.0	0.0	0.0	0.0	0.0	0.0	0.0	0.0	0.0	0.0	0.0	0.0	0.0	0.0	0.0	0.0	0.0	0.0	0.0	0.0	0.0	0.0	0.0	0.0	0.0	0.0	0.0	0.0	0.0	0.0	0.0	0.0	0.0	0.0	29.0	0.0	0.0	0.0	5.0	0.0	0.0	12.0
8dbe0681fa0a98a8c65e42bf7dab01de	k__Bacteria; p__Firmicutes; c__Erysipelotrichi; o__Erysipelotrichales; f__Erysipelotrichaceae; g__; s__	0.0	9.0	0.0	58.0	0.0	34.0	58.0	6.0	0.0	57.0	0.0	46.0	0.0	0.0	59.0	0.0	38.0	0.0	68.0	59.0	19.0	0.0	44.0	53.0	0.0	76.0	19.0	0.0	36.0	83.0	51.0	0.0	0.0	0.0	109.0	48.0	20.0	0.0	21.0	36.0	0.0	48.0	35.0	53.0	0.0	66.0	0.0	32.0
9b86223311e2e9a9bc8f4720658649d2	k__Bacteria; p__Firmicutes; c__Clostridia; o__Clostridiales; f__Ruminococcaceae; g__Oscillospira; s__	0.0	0.0	0.0	0.0	0.0	0.0	0.0	0.0	0.0	0.0	36.0	21.0	0.0	0.0	0.0	0.0	0.0	0.0	0.0	0.0	0.0	0.0	0.0	0.0	0.0	0.0	23.0	0.0	0.0	0.0	0.0	0.0	0.0	0.0	124.0	0.0	0.0	0.0	0.0	0.0	0.0	0.0	0.0	0.0	0.0	0.0	26.0	0.0
124d08b715ee79997e5de7acead68c54	k__Bacteria; p__Firmicutes; c__Clostridia; o__Clostridiales; f__Lachnospiraceae	0.0	0.0	0.0	59.0	74.0	0.0	0.0	0.0	0.0	0.0	0.0	44.0	63.0	30.0	0.0	0.0	0.0	0.0	0.0	52.0	0.0	0.0	54.0	0.0	0.0	0.0	83.0	0.0	0.0	0.0	34.0	0.0	0.0	73.0	0.0	60.0	0.0	0.0	0.0	30.0	0.0	0.0	0.0	0.0	0.0	0.0	0.0	0.0
d05d44c95029f574861e2dab149237d2	k__Bacteria; p__Firmicutes; c__Clostridia; o__Clostridiales; f__Ruminococcaceae; g__Ruminococcus; s__	0.0	0.0	0.0	0.0	0.0	27.0	0.0	0.0	0.0	0.0	15.0	0.0	11.0	0.0	0.0	0.0	0.0	0.0	0.0	0.0	0.0	0.0	0.0	0.0	0.0	0.0	0.0	0.0	0.0	0.0	0.0	0.0	47.0	0.0	0.0	31.0	20.0	0.0	0.0	0.0	0.0	0.0	0.0	0.0	0.0	41.0	0.0	0.0
c761e13a128797851463b584a1f16c25	k__Bacteria; p__Firmicutes; c__Clostridia; o__Clostridiales; f__Lachnospiraceae	0.0	0.0	0.0	61.0	0.0	0.0	0.0	0.0	0.0	0.0	0.0	58.0	0.0	0.0	0.0	0.0	0.0	0.0	0.0	0.0	0.0	0.0	0.0	0.0	0.0	0.0	0.0	0.0	0.0	0.0	0.0	0.0	0.0	0.0	64.0	0.0	55.0	0.0	0.0	0.0	0.0	0.0	0.0	0.0	0.0	0.0	0.0	0.0
26005273660e5a82dd188e1b04bdbb0c	k__Bacteria; p__Firmicutes; c__Clostridia; o__Clostridiales; f__Lachnospiraceae	0.0	0.0	0.0	0.0	0.0	0.0	0.0	0.0	0.0	0.0	0.0	0.0	0.0	0.0	0.0	0.0	0.0	0.0	0.0	41.0	0.0	0.0	0.0	0.0	0.0	0.0	22.0	0.0	0.0	0.0	19.0	0.0	0.0	0.0	0.0	0.0	0.0	35.0	0.0	0.0	0.0	0.0	0.0	0.0	0.0	0.0	0.0	0.0
4cb9d219b593373aa09b8b1d2990c565	k__Bacteria; p__Firmicutes; c__Clostridia; o__Clostridiales; f__Lachnospiraceae; g__Clostridium; s__lavalense	0.0	0.0	0.0	0.0	0.0	0.0	0.0	0.0	0.0	0.0	0.0	0.0	0.0	0.0	0.0	0.0	0.0	0.0	0.0	0.0	0.0	0.0	58.0	0.0	0.0	0.0	0.0	0.0	0.0	0.0	0.0	0.0	0.0	0.0	27.0	0.0	0.0	0.0	0.0	0.0	0.0	0.0	0.0	0.0	0.0	0.0	0.0	25.0
11c919e963106d3371cd67eab3aec8e5	k__Bacteria; p__Bacteroidetes; c__Bacteroidia; o__Bacteroidales; f__Bacteroidaceae; g__Bacteroides; s__	0.0	0.0	0.0	0.0	0.0	0.0	8.0	0.0	0.0	0.0	0.0	0.0	0.0	0.0	0.0	0.0	27.0	0.0	21.0	22.0	0.0	0.0	0.0	0.0	0.0	0.0	6.0	0.0	0.0	0.0	0.0	0.0	0.0	0.0	0.0	13.0	0.0	0.0	0.0	0.0	0.0	0.0	0.0	0.0	0.0	0.0	0.0	47.0
c5e13aedbfd8bc887296ff2078682dd4	k__Bacteria; p__Bacteroidetes; c__Bacteroidia; o__Bacteroidales; f__Rikenellaceae; g__; s__	0.0	14.0	0.0	0.0	0.0	0.0	0.0	0.0	0.0	4.0	0.0	0.0	0.0	0.0	0.0	0.0	0.0	12.0	0.0	0.0	0.0	0.0	0.0	0.0	0.0	0.0	9.0	0.0	0.0	0.0	25.0	12.0	13.0	0.0	21.0	1.0	0.0	3.0	0.0	0.0	0.0	0.0	0.0	0.0	0.0	0.0	13.0	0.0
7abe81658bcce04bd3bca6b4e336cab6	k__Bacteria; p__Firmicutes; c__Clostridia; o__Clostridiales; f__Ruminococcaceae; g__Ruminococcus; s__	0.0	44.0	0.0	0.0	0.0	40.0	0.0	28.0	0.0	15.0	0.0	0.0	0.0	0.0	0.0	0.0	0.0	0.0	0.0	15.0	0.0	0.0	52.0	0.0	0.0	0.0	54.0	0.0	63.0	0.0	0.0	28.0	79.0	0.0	36.0	0.0	56.0	44.0	0.0	0.0	0.0	0.0	0.0	0.0	0.0	0.0	0.0	0.0
7742c82ccdd6082bf61efdd968c12526	k__Bacteria; p__Bacteroidetes; c__Bacteroidia; o__Bacteroidales; f__Bacteroidaceae; g__Bacteroides; s__eggerthii	0.0	0.0	0.0	0.0	146.0	0.0	0.0	47.0	0.0	0.0	0.0	0.0	0.0	0.0	18.0	0.0	0.0	0.0	0.0	0.0	0.0	0.0	202.0	0.0	0.0	0.0	0.0	0.0	21.0	0.0	0.0	73.0	0.0	0.0	0.0	0.0	0.0	0.0	0.0	0.0	0.0	51.0	0.0	0.0	0.0	0.0	55.0	0.0
2c3abde7154ab6813a21a955d4afec6a	k__Bacteria; p__Firmicutes; c__Clostridia; o__Clostridiales; f__Lachnospiraceae; g__; s__	0.0	0.0	0.0	0.0	0.0	0.0	0.0	0.0	0.0	0.0	0.0	0.0	0.0	0.0	11.0	0.0	0.0	0.0	0.0	43.0	0.0	14.0	32.0	0.0	0.0	0.0	24.0	0.0	0.0	0.0	40.0	0.0	0.0	0.0	29.0	0.0	0.0	0.0	0.0	0.0	0.0	0.0	0.0	0.0	0.0	0.0	0.0	0.0
ac294145c059aee4c1a55d8477e3205e	k__Bacteria; p__Firmicutes; c__Clostridia; o__Clostridiales; f__Ruminococcaceae	0.0	0.0	0.0	0.0	0.0	0.0	0.0	0.0	0.0	0.0	0.0	0.0	0.0	0.0	0.0	0.0	0.0	0.0	0.0	0.0	0.0	0.0	0.0	0.0	0.0	0.0	0.0	0.0	0.0	0.0	65.0	42.0	0.0	0.0	0.0	0.0	0.0	18.0	0.0	0.0	0.0	0.0	0.0	0.0	0.0	0.0	0.0	15.0
ad4b8bc142d7b6dd813a2f70cad32ceb	k__Bacteria; p__Firmicutes; c__Clostridia; o__Clostridiales; f__; g__; s__	0.0	0.0	0.0	0.0	0.0	52.0	0.0	0.0	0.0	0.0	0.0	29.0	0.0	0.0	0.0	0.0	0.0	0.0	0.0	0.0	0.0	0.0	0.0	0.0	0.0	0.0	32.0	0.0	43.0	0.0	0.0	9.0	0.0	0.0	14.0	0.0	39.0	0.0	0.0	11.0	0.0	0.0	0.0	0.0	35.0	0.0	0.0	0.0
05e2645697ecc4e7f3b06c1f86b08d1b	k__Bacteria; p__Firmicutes; c__Clostridia; o__Clostridiales; f__Ruminococcaceae; g__Ruminococcus; s__	0.0	0.0	31.0	0.0	40.0	0.0	18.0	0.0	70.0	38.0	0.0	0.0	0.0	0.0	0.0	0.0	0.0	0.0	0.0	0.0	0.0	0.0	0.0	0.0	15.0	0.0	0.0	53.0	0.0	0.0	0.0	0.0	0.0	0.0	0.0	0.0	0.0	33.0	0.0	0.0	14.0	0.0	0.0	0.0	0.0	0.0	0.0	25.0
802583afe1891984e41c75aca2221cd7	k__Bacteria; p__Bacteroidetes; c__Bacteroidia; o__Bacteroidales; f__[Barnesiellaceae]; g__; s__	0.0	0.0	0.0	0.0	0.0	0.0	0.0	0.0	0.0	0.0	0.0	35.0	0.0	0.0	0.0	0.0	0.0	0.0	0.0	0.0	0.0	0.0	0.0	0.0	9.0	0.0	0.0	0.0	0.0	0.0	0.0	0.0	0.0	35.0	0.0	0.0	0.0	0.0	0.0	0.0	0.0	0.0	0.0	35.0	0.0	0.0	0.0	0.0
cb9c5d456affe8f58f219e69d0998426	k__Bacteria; p__Firmicutes; c__Clostridia; o__Clostridiales; f__Ruminococcaceae	0.0	0.0	0.0	0.0	0.0	0.0	0.0	0.0	0.0	37.0	0.0	0.0	0.0	0.0	42.0	0.0	0.0	0.0	0.0	0.0	0.0	0.0	0.0	0.0	0.0	0.0	100.0	0.0	0.0	0.0	0.0	0.0	39.0	0.0	0.0	0.0	0.0	0.0	0.0	0.0	0.0	0.0	0.0	0.0	30.0	0.0	0.0	0.0
484a3cab7df181f0f2f7d5dda8adeafb	k__Bacteria; p__Firmicutes; c__Clostridia; o__Clostridiales; f__[Mogibacteriaceae]; g__; s__	0.0	0.0	0.0	0.0	7.0	0.0	0.0	0.0	0.0	0.0	0.0	0.0	0.0	0.0	0.0	0.0	0.0	0.0	0.0	0.0	0.0	0.0	0.0	0.0	0.0	0.0	0.0	0.0	0.0	59.0	16.0	0.0	0.0	0.0	0.0	0.0	0.0	0.0	0.0	0.0	0.0	0.0	0.0	0.0	0.0	0.0	0.0	0.0
d10741405233b7b084867d34c3af9dc7	k__Bacteria; p__Firmicutes; c__Clostridia; o__Clostridiales; f__Lachnospiraceae; g__Blautia; s__	0.0	0.0	0.0	0.0	0.0	0.0	0.0	0.0	0.0	0.0	0.0	0.0	0.0	0.0	0.0	0.0	0.0	0.0	0.0	0.0	0.0	0.0	0.0	67.0	0.0	0.0	39.0	24.0	0.0	0.0	0.0	0.0	0.0	0.0	38.0	0.0	0.0	0.0	0.0	0.0	0.0	0.0	0.0	0.0	0.0	0.0	0.0	0.0
37fa9a3f0f8351447e857114bda6ef81	k__Bacteria; p__Bacteroidetes; c__Bacteroidia; o__Bacteroidales; f__[Odoribacteraceae]; g__Butyricimonas; s__	0.0	0.0	0.0	0.0	0.0	0.0	0.0	9.0	0.0	0.0	0.0	32.0	0.0	0.0	0.0	0.0	0.0	0.0	14.0	0.0	0.0	0.0	0.0	0.0	0.0	0.0	0.0	0.0	0.0	0.0	0.0	0.0	0.0	23.0	33.0	28.0	11.0	37.0	42.0	0.0	0.0	0.0	19.0	20.0	0.0	0.0	0.0	30.0
7a928bda60f48a1060908ba97dd86d01	k__Bacteria; p__Proteobacteria; c__Betaproteobacteria; o__Burkholderiales; f__Alcaligenaceae; g__Sutterella; s__	0.0	33.0	0.0	0.0	0.0	28.0	0.0	20.0	22.0	56.0	0.0	121.0	0.0	0.0	0.0	0.0	0.0	0.0	0.0	0.0	0.0	0.0	0.0	20.0	61.0	0.0	38.0	0.0	0.0	0.0	0.0	0.0	0.0	53.0	0.0	0.0	56.0	29.0	0.0	0.0	22.0	0.0	0.0	0.0	0.0	0.0	43.0	0.0
55cd86cb9bc5054f6d1ddd7b0a559094	k__Bacteria; p__Bacteroidetes; c__Bacteroidia; o__Bacteroidales; f__[Barnesiellaceae]; g__; s__	0.0	0.0	0.0	0.0	0.0	0.0	0.0	0.0	0.0	0.0	0.0	0.0	0.0	0.0	0.0	0.0	0.0	0.0	0.0	0.0	0.0	0.0	0.0	102.0	0.0	0.0	0.0	0.0	0.0	0.0	0.0	0.0	0.0	0.0	0.0	0.0	0.0	0.0	0.0	0.0	0.0	0.0	0.0	0.0	0.0	61.0	0.0	509.0
b418576b05ec898a77fd2274c8a7ba6e	k__Bacteria; p__Bacteroidetes; c__Bacteroidia; o__Bacteroidales; f__Bacteroidaceae; g__Bacteroides; s__uniformis	16.0	0.0	0.0	28.0	0.0	28.0	11.0	83.0	0.0	263.0	0.0	216.0	0.0	0.0	64.0	16.0	19.0	0.0	0.0	153.0	0.0	13.0	0.0	0.0	418.0	86.0	123.0	29.0	147.0	0.0	0.0	204.0	0.0	0.0	98.0	194.0	0.0	442.0	0.0	44.0	0.0	0.0	0.0	0.0	0.0	435.0	0.0	43.0
72f22427c408880b73d0a7a6cfbe59c2	k__Bacteria; p__Proteobacteria; c__Gammaproteobacteria; o__Enterobacteriales; f__Enterobacteriaceae	0.0	0.0	40.0	0.0	31.0	0.0	19.0	0.0	0.0	0.0	0.0	0.0	0.0	8.0	0.0	0.0	0.0	0.0	0.0	0.0	0.0	0.0	0.0	0.0	11.0	0.0	0.0	0.0	0.0	0.0	9.0	8.0	68.0	0.0	0.0	0.0	0.0	0.0	0.0	0.0	572.0	68.0	0.0	0.0	0.0	0.0	5.0	6.0
a7e39fb3e455440bb2ee624c04a2fbc4	k__Bacteria; p__Proteobacteria; c__Gammaproteobacteria; o__Enterobacteriales; f__Enterobacteriaceae	23.0	40.0	1048.0	1302.0	281.0	36.0	765.0	0.0	39.0	125.0	35.0	0.0	0.0	81.0	0.0	41.0	28.0	240.0	67.0	59.0	97.0	28.0	0.0	36.0	60.0	0.0	0.0	83.0	40.0	0.0	46.0	25.0	93.0	82.0	0.0	35.0	1415.0	216.0	0.0	0.0	2646.0	295.0	50.0	0.0	80.0	0.0	24.0	58.0
537016be7aeea8a1563c81237216fa57	k__Bacteria; p__Firmicutes; c__Clostridia; o__Clostridiales; f__Ruminococcaceae; g__Oscillospira; s__	39.0	108.0	0.0	0.0	0.0	112.0	0.0	0.0	0.0	0.0	51.0	118.0	60.0	35.0	0.0	45.0	256.0	29.0	0.0	0.0	0.0	0.0	0.0	0.0	0.0	0.0	0.0	0.0	85.0	0.0	0.0	177.0	161.0	0.0	0.0	416.0	0.0	61.0	0.0	0.0	0.0	254.0	19.0	25.0	32.0	0.0	105.0	0.0
dc26734cd41d6184f52de9a7c51a75b9	k__Bacteria; p__Bacteroidetes; c__Bacteroidia; o__Bacteroidales; f__Porphyromonadaceae; g__Parabacteroides; s__distasonis	0.0	0.0	0.0	0.0	0.0	0.0	0.0	0.0	16.0	0.0	0.0	0.0	0.0	0.0	0.0	0.0	0.0	0.0	0.0	0.0	0.0	0.0	38.0	0.0	0.0	0.0	0.0	0.0	0.0	0.0	0.0	81.0	0.0	50.0	0.0	0.0	0.0	0.0	0.0	0.0	0.0	0.0	0.0	0.0	0.0	0.0	0.0	112.0
5ac8c426fafcf7d387188e42b6552cbd	k__Bacteria; p__Firmicutes; c__Clostridia; o__Clostridiales; f__Ruminococcaceae; g__Oscillospira; s__	0.0	0.0	0.0	0.0	0.0	0.0	0.0	0.0	0.0	0.0	0.0	0.0	0.0	0.0	0.0	0.0	0.0	24.0	0.0	0.0	0.0	0.0	0.0	0.0	0.0	0.0	0.0	0.0	0.0	0.0	0.0	0.0	0.0	0.0	0.0	0.0	0.0	0.0	0.0	0.0	16.0	0.0	0.0	0.0	0.0	0.0	9.0	0.0
69a0d09d1bc782c22a013705d886cda3	k__Bacteria; p__Firmicutes; c__Clostridia; o__Clostridiales; f__Lachnospiraceae; g__Coprococcus; s__	0.0	0.0	0.0	0.0	0.0	0.0	0.0	0.0	0.0	0.0	0.0	0.0	0.0	0.0	0.0	0.0	0.0	0.0	0.0	0.0	0.0	0.0	0.0	0.0	0.0	0.0	0.0	0.0	0.0	0.0	15.0	0.0	0.0	0.0	0.0	0.0	0.0	35.0	0.0	0.0	0.0	0.0	0.0	0.0	0.0	0.0	0.0	0.0
e51f8f3fb02545ab4aad08c7af8fa538	k__Bacteria; p__Bacteroidetes; c__Bacteroidia; o__Bacteroidales; f__Bacteroidaceae; g__Bacteroides; s__ovatus	0.0	0.0	0.0	0.0	36.0	0.0	0.0	37.0	17.0	50.0	0.0	216.0	40.0	46.0	22.0	28.0	0.0	0.0	120.0	56.0	0.0	0.0	0.0	0.0	74.0	0.0	24.0	0.0	50.0	0.0	189.0	0.0	0.0	8.0	0.0	11.0	290.0	81.0	54.0	404.0	85.0	26.0	177.0	0.0	52.0	0.0	43.0	164.0
ea2268c3133454e99f5efd37dfe8f47d	k__Bacteria; p__Firmicutes; c__Bacilli; o__Lactobacillales; f__Streptococcaceae; g__Streptococcus	0.0	0.0	0.0	0.0	0.0	0.0	0.0	0.0	0.0	18.0	0.0	0.0	0.0	0.0	0.0	0.0	0.0	22.0	0.0	0.0	0.0	0.0	0.0	0.0	0.0	0.0	0.0	0.0	0.0	0.0	0.0	0.0	0.0	0.0	0.0	0.0	0.0	11.0	0.0	0.0	18.0	0.0	0.0	0.0	0.0	0.0	0.0	9.0
c2e7c72414d58e363e3f07444efad45a	k__Bacteria; p__Firmicutes; c__Clostridia; o__Clostridiales; f__Ruminococcaceae; g__Oscillospira; s__	0.0	0.0	0.0	0.0	0.0	0.0	33.0	0.0	0.0	16.0	0.0	0.0	0.0	0.0	0.0	0.0	0.0	0.0	78.0	0.0	0.0	26.0	67.0	0.0	53.0	0.0	0.0	0.0	40.0	0.0	28.0	0.0	24.0	0.0	66.0	0.0	0.0	0.0	0.0	0.0	0.0	0.0	9.0	30.0	0.0	0.0	0.0	55.0
d1a280160c16f75937c0a9b9d6ebb687	k__Bacteria; p__Actinobacteria; c__Coriobacteriia; o__Coriobacteriales; f__Coriobacteriaceae; g__Slackia; s__	0.0	0.0	0.0	0.0	0.0	38.0	0.0	0.0	0.0	55.0	24.0	0.0	30.0	0.0	0.0	0.0	0.0	0.0	0.0	0.0	0.0	0.0	0.0	0.0	0.0	0.0	0.0	0.0	0.0	0.0	0.0	0.0	0.0	0.0	0.0	0.0	0.0	0.0	0.0	0.0	0.0	23.0	0.0	0.0	0.0	0.0	0.0	33.0
98ecc85273b4b0f5c0986972a31d10f6	k__Bacteria; p__Firmicutes; c__Clostridia; o__Clostridiales; f__Lachnospiraceae	0.0	0.0	0.0	0.0	0.0	0.0	0.0	0.0	0.0	0.0	0.0	0.0	0.0	0.0	0.0	0.0	0.0	0.0	0.0	0.0	0.0	0.0	23.0	0.0	0.0	0.0	0.0	0.0	0.0	0.0	0.0	0.0	0.0	0.0	44.0	0.0	0.0	10.0	0.0	0.0	0.0	0.0	0.0	0.0	0.0	0.0	0.0	0.0
e5d56c6c37f2d0336d1f3b51d7bbe800	k__Bacteria; p__Firmicutes; c__Clostridia; o__Clostridiales; f__Clostridiaceae	0.0	0.0	0.0	0.0	0.0	0.0	0.0	0.0	0.0	0.0	0.0	0.0	0.0	0.0	0.0	0.0	0.0	29.0	0.0	0.0	0.0	0.0	0.0	0.0	0.0	0.0	0.0	65.0	0.0	0.0	0.0	0.0	0.0	0.0	63.0	0.0	0.0	0.0	0.0	0.0	27.0	0.0	0.0	0.0	0.0	0.0	0.0	77.0
31af25ba08095a1e9d4ec7d0f7d4cd27	k__Bacteria; p__Bacteroidetes; c__Bacteroidia; o__Bacteroidales; f__[Paraprevotellaceae]; g__Paraprevotella; s__	0.0	0.0	0.0	0.0	0.0	125.0	0.0	37.0	0.0	34.0	0.0	0.0	0.0	98.0	0.0	0.0	74.0	0.0	0.0	0.0	0.0	0.0	0.0	0.0	0.0	0.0	0.0	0.0	129.0	0.0	0.0	23.0	0.0	0.0	0.0	0.0	0.0	0.0	77.0	0.0	51.0	0.0	0.0	0.0	0.0	0.0	0.0	0.0
7226ab8eab8759bda0e0152f813d5b4a	k__Bacteria; p__Firmicutes; c__Clostridia; o__Clostridiales; f__; g__; s__	0.0	0.0	0.0	0.0	0.0	0.0	0.0	0.0	0.0	19.0	0.0	0.0	0.0	0.0	0.0	64.0	0.0	0.0	0.0	0.0	0.0	0.0	0.0	0.0	21.0	0.0	0.0	0.0	0.0	19.0	0.0	0.0	0.0	0.0	0.0	0.0	0.0	0.0	0.0	0.0	0.0	0.0	0.0	0.0	0.0	0.0	0.0	0.0
45d879a98eb03721cde10524f9e10231	k__Bacteria; p__Firmicutes; c__Clostridia; o__Clostridiales; f__Ruminococcaceae; g__; s__	0.0	51.0	0.0	0.0	0.0	0.0	0.0	0.0	0.0	0.0	22.0	0.0	0.0	0.0	0.0	0.0	0.0	41.0	0.0	0.0	0.0	0.0	0.0	0.0	0.0	0.0	0.0	0.0	0.0	0.0	0.0	0.0	8.0	7.0	17.0	0.0	0.0	1.0	0.0	0.0	0.0	4.0	0.0	0.0	0.0	0.0	0.0	0.0
7f4655f72537eb6fddebf202e1159fd2	k__Bacteria; p__Actinobacteria; c__Actinobacteria; o__Bifidobacteriales; f__Bifidobacteriaceae; g__Bifidobacterium; s__longum	0.0	0.0	0.0	0.0	133.0	9.0	0.0	37.0	0.0	0.0	0.0	0.0	0.0	0.0	0.0	0.0	0.0	0.0	0.0	0.0	0.0	0.0	0.0	0.0	0.0	0.0	0.0	0.0	0.0	0.0	0.0	0.0	0.0	0.0	0.0	0.0	0.0	0.0	0.0	0.0	0.0	0.0	0.0	0.0	0.0	0.0	0.0	0.0
f46ebe149d2645bb0cdaf73a199a74cd	k__Bacteria; p__Firmicutes; c__Clostridia; o__Clostridiales; f__Lachnospiraceae; g__Coprococcus; s__eutactus	41.0	0.0	0.0	0.0	0.0	50.0	0.0	0.0	0.0	0.0	0.0	98.0	101.0	71.0	0.0	0.0	0.0	31.0	0.0	36.0	0.0	0.0	0.0	0.0	0.0	0.0	48.0	0.0	57.0	0.0	0.0	0.0	0.0	0.0	0.0	76.0	0.0	0.0	0.0	0.0	0.0	0.0	0.0	0.0	0.0	0.0	0.0	0.0
98183a31236991e38f2f2df7269dfadb	k__Bacteria; p__Firmicutes; c__Clostridia; o__Clostridiales; f__Clostridiaceae; g__Clostridium	0.0	0.0	0.0	0.0	0.0	0.0	0.0	33.0	0.0	70.0	0.0	0.0	0.0	0.0	0.0	0.0	0.0	0.0	0.0	0.0	0.0	0.0	0.0	24.0	0.0	0.0	25.0	0.0	0.0	0.0	0.0	0.0	0.0	0.0	0.0	0.0	0.0	0.0	0.0	0.0	0.0	0.0	0.0	0.0	0.0	0.0	11.0	0.0
7f89131e4a59164230ccc5a818e59f28	k__Bacteria; p__Firmicutes; c__Erysipelotrichi; o__Erysipelotrichales; f__Erysipelotrichaceae; g__; s__	0.0	0.0	0.0	18.0	0.0	0.0	19.0	0.0	0.0	0.0	0.0	0.0	0.0	0.0	0.0	0.0	0.0	0.0	0.0	0.0	0.0	0.0	0.0	0.0	0.0	0.0	0.0	0.0	0.0	12.0	0.0	0.0	0.0	0.0	11.0	0.0	0.0	0.0	0.0	0.0	0.0	0.0	0.0	0.0	0.0	0.0	0.0	0.0
25ef000ac353f14e4d892644d78ce275	k__Bacteria; p__Proteobacteria; c__Deltaproteobacteria; o__Desulfovibrionales; f__Desulfovibrionaceae; g__Bilophila; s__	0.0	0.0	0.0	0.0	0.0	0.0	0.0	0.0	0.0	0.0	0.0	0.0	0.0	0.0	0.0	0.0	0.0	0.0	0.0	0.0	0.0	0.0	0.0	46.0	0.0	35.0	0.0	0.0	0.0	0.0	0.0	0.0	0.0	0.0	0.0	0.0	47.0	0.0	0.0	0.0	0.0	0.0	42.0	0.0	0.0	70.0	0.0	0.0
1ea6b41ce19db98ee1d957265f52a87c	k__Bacteria; p__Firmicutes; c__Bacilli; o__Lactobacillales; f__Enterococcaceae; g__Enterococcus; s__	0.0	0.0	0.0	41.0	26.0	27.0	0.0	0.0	0.0	37.0	0.0	0.0	0.0	29.0	0.0	0.0	20.0	0.0	0.0	0.0	0.0	42.0	0.0	0.0	0.0	0.0	0.0	37.0	0.0	0.0	0.0	0.0	0.0	0.0	0.0	0.0	0.0	104.0	0.0	0.0	6.0	23.0	0.0	0.0	0.0	0.0	0.0	0.0
74c0b0b08b7ed7354b96df7efa84a832	k__Bacteria; p__Firmicutes; c__Bacilli; o__Turicibacterales; f__Turicibacteraceae; g__Turicibacter; s__	0.0	0.0	23.0	0.0	16.0	0.0	0.0	23.0	0.0	0.0	0.0	0.0	0.0	0.0	0.0	0.0	0.0	0.0	0.0	0.0	0.0	0.0	0.0	0.0	0.0	0.0	0.0	24.0	0.0	0.0	0.0	0.0	0.0	0.0	274.0	0.0	7.0	0.0	0.0	0.0	10.0	0.0	0.0	0.0	0.0	0.0	0.0	15.0
422dab361eaaa3b308e571f6c0f8e8ad	k__Bacteria; p__Firmicutes; c__Clostridia; o__Clostridiales; f__Lachnospiraceae; g__Coprococcus; s__	0.0	0.0	84.0	0.0	10.0	25.0	29.0	0.0	6.0	47.0	0.0	99.0	23.0	50.0	0.0	32.0	61.0	0.0	35.0	29.0	38.0	49.0	54.0	22.0	80.0	40.0	59.0	23.0	91.0	41.0	38.0	0.0	0.0	0.0	108.0	0.0	47.0	85.0	64.0	53.0	78.0	78.0	42.0	27.0	36.0	90.0	0.0	59.0
0abdec782d0ac71a3510e7d86a831f23	k__Bacteria; p__Proteobacteria; c__Betaproteobacteria; o__Burkholderiales; f__Alcaligenaceae; g__Sutterella; s__	0.0	0.0	0.0	0.0	0.0	25.0	4.0	24.0	33.0	24.0	0.0	176.0	0.0	0.0	0.0	0.0	23.0	28.0	0.0	0.0	0.0	0.0	0.0	27.0	162.0	30.0	26.0	0.0	0.0	0.0	0.0	0.0	0.0	82.0	41.0	30.0	9.0	52.0	0.0	0.0	72.0	0.0	0.0	24.0	0.0	0.0	63.0	0.0
5c5d076c0e01df1ce22cd0855fb29dc3	k__Bacteria; p__Firmicutes; c__Clostridia; o__Clostridiales; f__Ruminococcaceae; g__Oscillospira; s__	0.0	44.0	0.0	0.0	0.0	26.0	23.0	28.0	0.0	28.0	15.0	0.0	0.0	0.0	0.0	0.0	0.0	0.0	0.0	0.0	0.0	0.0	0.0	0.0	0.0	0.0	0.0	0.0	0.0	30.0	0.0	0.0	0.0	0.0	28.0	39.0	0.0	0.0	0.0	0.0	0.0	0.0	15.0	0.0	0.0	0.0	11.0	14.0
e8c768d494077422d58218a206cb83a7	k__Bacteria; p__Firmicutes; c__Clostridia; o__Clostridiales; f__Lachnospiraceae; g__Coprococcus; s__	0.0	0.0	0.0	0.0	0.0	0.0	0.0	0.0	0.0	0.0	0.0	0.0	0.0	0.0	0.0	0.0	0.0	0.0	0.0	0.0	0.0	0.0	0.0	0.0	0.0	0.0	0.0	0.0	0.0	14.0	21.0	0.0	0.0	0.0	0.0	0.0	0.0	23.0	0.0	0.0	0.0	0.0	0.0	0.0	0.0	0.0	16.0	0.0
b6bba14f47b369d2de4955a15d954fac	k__Bacteria; p__Firmicutes; c__Erysipelotrichi; o__Erysipelotrichales; f__Erysipelotrichaceae; g__[Eubacterium]; s__dolichum	0.0	0.0	23.0	0.0	27.0	0.0	0.0	0.0	0.0	0.0	0.0	0.0	0.0	0.0	0.0	0.0	0.0	0.0	0.0	0.0	0.0	0.0	0.0	0.0	0.0	0.0	0.0	0.0	0.0	0.0	0.0	0.0	0.0	0.0	50.0	0.0	0.0	0.0	0.0	0.0	22.0	0.0	0.0	0.0	0.0	0.0	0.0	0.0
fdf1ff144599fb5ecdff44e3637d4b71	k__Bacteria; p__Proteobacteria; c__Gammaproteobacteria; o__Enterobacteriales; f__Enterobacteriaceae	13.0	0.0	632.0	812.0	270.0	29.0	469.0	0.0	0.0	140.0	34.0	0.0	0.0	38.0	0.0	0.0	21.0	158.0	0.0	50.0	85.0	36.0	0.0	41.0	26.0	0.0	0.0	44.0	29.0	0.0	46.0	7.0	33.0	0.0	0.0	0.0	870.0	89.0	0.0	0.0	1328.0	185.0	0.0	0.0	0.0	0.0	25.0	27.0
dfebd41c894aa72f1fb03af902fddeac	k__Bacteria; p__Firmicutes; c__Clostridia; o__Clostridiales; f__Ruminococcaceae; g__Ruminococcus; s__bromii	0.0	18.0	0.0	0.0	0.0	9.0	0.0	0.0	90.0	0.0	0.0	48.0	0.0	0.0	0.0	44.0	37.0	0.0	18.0	0.0	0.0	0.0	0.0	0.0	0.0	0.0	0.0	0.0	26.0	83.0	0.0	0.0	0.0	42.0	272.0	38.0	36.0	0.0	0.0	0.0	0.0	0.0	0.0	0.0	30.0	23.0	0.0	1218.0
db3ebd56d1af6cda68d28627ef2223e3	k__Bacteria; p__Firmicutes; c__Clostridia; o__Clostridiales	0.0	0.0	0.0	0.0	0.0	0.0	29.0	0.0	0.0	47.0	0.0	0.0	0.0	0.0	0.0	71.0	0.0	0.0	0.0	0.0	0.0	0.0	53.0	40.0	0.0	47.0	34.0	0.0	17.0	31.0	18.0	0.0	0.0	0.0	0.0	25.0	21.0	0.0	0.0	0.0	0.0	0.0	23.0	13.0	0.0	0.0	0.0	53.0
09b3271a237243c61f47de5d19dbf641	k__Bacteria; p__Proteobacteria; c__Deltaproteobacteria; o__Desulfovibrionales; f__Desulfovibrionaceae; g__Desulfovibrio; s__	0.0	0.0	0.0	0.0	0.0	0.0	0.0	0.0	0.0	0.0	0.0	0.0	0.0	0.0	0.0	0.0	0.0	34.0	0.0	0.0	0.0	0.0	0.0	0.0	0.0	0.0	0.0	0.0	0.0	0.0	0.0	0.0	0.0	0.0	235.0	0.0	0.0	0.0	0.0	0.0	0.0	0.0	0.0	0.0	0.0	0.0	60.0	0.0
1e27fcebecbf56261c46a9ec5946b445	k__Bacteria; p__Firmicutes; c__Clostridia; o__Clostridiales; f__Lachnospiraceae; g__Coprococcus; s__	0.0	0.0	0.0	0.0	0.0	66.0	0.0	0.0	32.0	0.0	0.0	0.0	0.0	0.0	0.0	0.0	0.0	46.0	0.0	0.0	0.0	0.0	0.0	0.0	0.0	42.0	43.0	0.0	0.0	0.0	0.0	0.0	0.0	0.0	0.0	29.0	0.0	0.0	0.0	0.0	0.0	0.0	0.0	0.0	0.0	0.0	0.0	0.0
1be1950d04c56297519ce6d5b78c531e	k__Bacteria; p__Firmicutes; c__Clostridia; o__Clostridiales; f__Ruminococcaceae	0.0	0.0	0.0	0.0	168.0	0.0	0.0	0.0	60.0	8.0	31.0	56.0	0.0	0.0	0.0	0.0	0.0	0.0	64.0	0.0	0.0	0.0	0.0	0.0	0.0	0.0	0.0	0.0	0.0	56.0	25.0	0.0	64.0	0.0	0.0	0.0	0.0	0.0	0.0	0.0	0.0	0.0	0.0	0.0	0.0	0.0	0.0	0.0
bbf9ea252f1f7e9fc521b465a1006972	k__Bacteria; p__Actinobacteria; c__Coriobacteriia; o__Coriobacteriales; f__Coriobacteriaceae; g__Eggerthella; s__lenta	0.0	0.0	9.0	0.0	9.0	0.0	0.0	0.0	0.0	0.0	0.0	0.0	0.0	0.0	0.0	0.0	0.0	0.0	45.0	0.0	0.0	0.0	0.0	0.0	53.0	0.0	0.0	0.0	0.0	0.0	0.0	0.0	0.0	0.0	0.0	0.0	0.0	0.0	0.0	0.0	0.0	0.0	0.0	0.0	0.0	0.0	0.0	0.0
65c6be619a9a376ba96ccd390c7edb36	k__Bacteria; p__Firmicutes; c__Clostridia; o__Clostridiales; f__Lachnospiraceae; g__Coprococcus; s__catus	0.0	0.0	0.0	0.0	0.0	0.0	0.0	0.0	0.0	0.0	0.0	0.0	0.0	0.0	0.0	0.0	0.0	0.0	0.0	0.0	0.0	0.0	0.0	0.0	0.0	0.0	0.0	38.0	0.0	0.0	0.0	0.0	51.0	0.0	26.0	0.0	0.0	0.0	0.0	0.0	0.0	18.0	0.0	0.0	19.0	0.0	0.0	0.0
627e4e457faf9603fb09ad2e0020a9ff	k__Bacteria; p__Firmicutes; c__Clostridia; o__Clostridiales; f__Lachnospiraceae; g__Coprococcus; s__	0.0	62.0	98.0	46.0	46.0	61.0	39.0	49.0	47.0	76.0	0.0	76.0	14.0	41.0	38.0	0.0	43.0	0.0	68.0	29.0	21.0	0.0	21.0	35.0	33.0	36.0	29.0	32.0	0.0	0.0	0.0	58.0	0.0	25.0	179.0	0.0	0.0	66.0	28.0	48.0	0.0	0.0	37.0	29.0	49.0	40.0	46.0	32.0
a4a07677ee1bce3d0f6ca1e20cbcd84d	k__Bacteria; p__Firmicutes; c__Clostridia; o__Clostridiales; f__Lachnospiraceae; g__[Ruminococcus]; s__	0.0	0.0	0.0	0.0	57.0	0.0	0.0	10.0	0.0	0.0	0.0	27.0	0.0	0.0	0.0	0.0	0.0	22.0	0.0	0.0	0.0	0.0	0.0	0.0	0.0	0.0	0.0	23.0	0.0	0.0	0.0	0.0	0.0	0.0	76.0	0.0	0.0	36.0	0.0	0.0	0.0	0.0	0.0	0.0	0.0	0.0	0.0	71.0
271c49c5176efcd7c39c9b3fb672454b	k__Bacteria; p__Actinobacteria; c__Coriobacteriia; o__Coriobacteriales; f__Coriobacteriaceae; g__Slackia; s__	0.0	0.0	0.0	0.0	0.0	0.0	0.0	0.0	0.0	0.0	0.0	0.0	17.0	0.0	0.0	0.0	0.0	0.0	0.0	0.0	0.0	0.0	0.0	0.0	0.0	0.0	0.0	0.0	0.0	0.0	0.0	0.0	31.0	0.0	0.0	0.0	0.0	0.0	11.0	0.0	0.0	0.0	0.0	0.0	0.0	0.0	0.0	39.0
dae5e5f46a7950f29094120064e6b018	k__Bacteria; p__Bacteroidetes; c__Bacteroidia; o__Bacteroidales; f__[Odoribacteraceae]; g__Butyricimonas; s__	0.0	0.0	0.0	0.0	0.0	0.0	0.0	0.0	0.0	0.0	17.0	0.0	38.0	0.0	0.0	0.0	0.0	0.0	0.0	0.0	0.0	0.0	0.0	0.0	0.0	0.0	0.0	0.0	0.0	0.0	0.0	0.0	0.0	0.0	0.0	0.0	0.0	0.0	0.0	0.0	0.0	9.0	0.0	0.0	0.0	0.0	8.0	0.0
d80aa93b42b69e3b2e00c4052723bf5c	k__Bacteria; p__Firmicutes; c__Clostridia; o__Clostridiales; f__Ruminococcaceae; g__; s__	0.0	0.0	0.0	0.0	0.0	0.0	0.0	0.0	0.0	0.0	30.0	54.0	51.0	0.0	0.0	0.0	0.0	0.0	0.0	0.0	0.0	0.0	0.0	0.0	0.0	0.0	19.0	0.0	0.0	0.0	0.0	0.0	0.0	44.0	0.0	0.0	0.0	0.0	0.0	0.0	0.0	0.0	0.0	0.0	0.0	0.0	44.0	0.0
5b41f30b04e596e699ed278f63ce5191	k__Bacteria; p__Firmicutes; c__Clostridia; o__Clostridiales; f__Lachnospiraceae; g__Clostridium; s__aldenense	0.0	0.0	0.0	0.0	0.0	0.0	0.0	0.0	0.0	0.0	0.0	0.0	0.0	0.0	0.0	0.0	0.0	0.0	0.0	0.0	0.0	0.0	0.0	0.0	0.0	0.0	0.0	0.0	0.0	0.0	0.0	0.0	0.0	0.0	0.0	0.0	0.0	0.0	0.0	0.0	0.0	0.0	0.0	0.0	0.0	0.0	0.0	28.0
88886891164e0a437ac1a7870a25ebde	k__Bacteria; p__Firmicutes; c__Clostridia; o__Clostridiales; f__Lachnospiraceae	0.0	0.0	0.0	0.0	0.0	65.0	0.0	0.0	40.0	0.0	0.0	0.0	0.0	0.0	0.0	15.0	44.0	0.0	0.0	0.0	0.0	0.0	0.0	53.0	0.0	0.0	0.0	0.0	0.0	0.0	0.0	0.0	0.0	0.0	0.0	0.0	0.0	0.0	25.0	0.0	0.0	0.0	0.0	0.0	0.0	0.0	0.0	0.0
fa88cbc9e6e5d5bf1e86390d9859d4a2	k__Bacteria; p__Firmicutes; c__Clostridia; o__Clostridiales; f__Ruminococcaceae	0.0	0.0	0.0	0.0	0.0	0.0	0.0	0.0	0.0	0.0	0.0	0.0	0.0	0.0	0.0	0.0	0.0	0.0	0.0	0.0	0.0	38.0	0.0	0.0	0.0	0.0	0.0	0.0	0.0	0.0	0.0	0.0	44.0	0.0	0.0	26.0	0.0	0.0	0.0	0.0	0.0	0.0	0.0	51.0	0.0	0.0	19.0	0.0
086e7de9477c7f9532952c4375a2e850	k__Bacteria; p__Firmicutes; c__Clostridia; o__Clostridiales; f__Lachnospiraceae; g__; s__	0.0	0.0	0.0	0.0	0.0	0.0	0.0	0.0	0.0	0.0	0.0	0.0	0.0	0.0	0.0	0.0	0.0	0.0	0.0	0.0	0.0	0.0	42.0	29.0	0.0	0.0	0.0	0.0	0.0	0.0	0.0	0.0	0.0	0.0	0.0	26.0	0.0	0.0	0.0	0.0	0.0	0.0	0.0	0.0	0.0	0.0	0.0	0.0
44d5b237080313af9b841e0f4e2160c3	k__Bacteria; p__Bacteroidetes; c__Bacteroidia; o__Bacteroidales; f__Bacteroidaceae; g__Bacteroides; s__	0.0	0.0	0.0	0.0	0.0	0.0	0.0	0.0	0.0	0.0	0.0	0.0	19.0	0.0	0.0	0.0	0.0	0.0	0.0	0.0	0.0	0.0	0.0	0.0	0.0	250.0	29.0	0.0	0.0	0.0	0.0	0.0	0.0	0.0	0.0	0.0	0.0	487.0	0.0	0.0	0.0	0.0	0.0	0.0	0.0	0.0	0.0	0.0
96b7350a0e1a5504e5e085b4bbe264ef	k__Bacteria; p__Firmicutes; c__Clostridia; o__Clostridiales; f__Clostridiaceae; g__; s__	0.0	26.0	0.0	0.0	47.0	33.0	0.0	0.0	0.0	0.0	0.0	0.0	0.0	19.0	0.0	0.0	0.0	0.0	0.0	0.0	0.0	0.0	0.0	0.0	0.0	0.0	0.0	0.0	0.0	0.0	0.0	0.0	0.0	32.0	21.0	0.0	0.0	0.0	0.0	0.0	0.0	0.0	0.0	0.0	0.0	0.0	0.0	0.0
985a8be56a9427e1c2dcc15a0bb758e4	k__Bacteria; p__Firmicutes; c__Bacilli; o__Lactobacillales; f__Streptococcaceae; g__Streptococcus; s__	0.0	0.0	101.0	28.0	51.0	0.0	0.0	11.0	0.0	0.0	0.0	0.0	0.0	0.0	0.0	0.0	0.0	0.0	42.0	0.0	0.0	37.0	0.0	0.0	0.0	58.0	59.0	430.0	0.0	91.0	43.0	0.0	57.0	0.0	39.0	0.0	0.0	0.0	0.0	37.0	37.0	33.0	0.0	56.0	699.0	0.0	0.0	12.0
7a431359f290f425e4f044fb9840c070	k__Bacteria; p__Firmicutes; c__Clostridia; o__Clostridiales; f__Lachnospiraceae; g__; s__	0.0	0.0	0.0	0.0	0.0	8.0	0.0	0.0	0.0	0.0	0.0	0.0	0.0	22.0	0.0	0.0	0.0	0.0	0.0	0.0	0.0	0.0	0.0	0.0	0.0	0.0	87.0	0.0	0.0	0.0	60.0	0.0	0.0	0.0	39.0	0.0	0.0	0.0	0.0	0.0	0.0	44.0	0.0	0.0	0.0	0.0	0.0	46.0
4e821863b02df268964653e8752b4fbe	k__Bacteria; p__Firmicutes; c__Clostridia; o__Clostridiales; f__Lachnospiraceae; g__Blautia; s__obeum	0.0	35.0	0.0	0.0	0.0	23.0	75.0	58.0	53.0	37.0	0.0	49.0	0.0	40.0	0.0	38.0	29.0	0.0	0.0	0.0	0.0	32.0	0.0	0.0	41.0	59.0	0.0	0.0	0.0	61.0	91.0	26.0	32.0	0.0	79.0	65.0	30.0	75.0	38.0	0.0	0.0	20.0	30.0	0.0	0.0	0.0	0.0	95.0
f6e34cd15178462aae5d53a0581d1990	k__Bacteria; p__Firmicutes; c__Erysipelotrichi; o__Erysipelotrichales; f__Erysipelotrichaceae; g__[Eubacterium]; s__dolichum	0.0	0.0	60.0	0.0	20.0	0.0	19.0	0.0	0.0	0.0	0.0	0.0	0.0	0.0	0.0	0.0	0.0	0.0	0.0	0.0	0.0	0.0	0.0	0.0	0.0	0.0	0.0	0.0	0.0	0.0	0.0	0.0	0.0	0.0	27.0	0.0	0.0	0.0	0.0	0.0	29.0	0.0	0.0	0.0	0.0	0.0	8.0	0.0
cbb2446ed3ba8845a920755bca179514	k__Bacteria; p__Bacteroidetes; c__Bacteroidia; o__Bacteroidales; f__Bacteroidaceae; g__Bacteroides; s__	0.0	31.0	0.0	0.0	0.0	0.0	41.0	101.0	0.0	0.0	0.0	0.0	23.0	0.0	0.0	7.0	36.0	27.0	62.0	371.0	0.0	7.0	0.0	66.0	0.0	0.0	37.0	74.0	0.0	0.0	0.0	0.0	92.0	0.0	0.0	0.0	62.0	0.0	64.0	0.0	0.0	159.0	304.0	118.0	0.0	0.0	105.0	0.0
a2c8e68632a4c4b4c480031859bf68da	k__Bacteria; p__Bacteroidetes; c__Bacteroidia; o__Bacteroidales; f__Bacteroidaceae; g__Bacteroides; s__	0.0	0.0	0.0	0.0	0.0	0.0	0.0	0.0	0.0	0.0	0.0	0.0	0.0	0.0	0.0	32.0	0.0	0.0	0.0	0.0	0.0	28.0	0.0	0.0	0.0	0.0	0.0	0.0	0.0	17.0	0.0	0.0	0.0	0.0	0.0	0.0	0.0	0.0	0.0	0.0	0.0	21.0	0.0	0.0	0.0	0.0	0.0	0.0
7429f2c5c77d900e0ccbc86855a8579c	k__Bacteria; p__Firmicutes; c__Clostridia; o__Clostridiales; f__; g__; s__	0.0	0.0	0.0	0.0	0.0	49.0	0.0	0.0	0.0	0.0	0.0	55.0	0.0	53.0	0.0	0.0	0.0	25.0	0.0	0.0	0.0	0.0	0.0	0.0	0.0	0.0	14.0	0.0	44.0	0.0	0.0	29.0	0.0	0.0	23.0	0.0	19.0	0.0	9.0	14.0	0.0	0.0	0.0	0.0	38.0	0.0	0.0	0.0
822b69f85f40e8aaa9821eaf769e71ed	k__Bacteria; p__Firmicutes; c__Clostridia; o__Clostridiales; f__Lachnospiraceae; g__; s__	0.0	0.0	0.0	79.0	0.0	40.0	0.0	0.0	0.0	43.0	0.0	66.0	0.0	0.0	0.0	0.0	0.0	0.0	0.0	0.0	0.0	0.0	0.0	0.0	0.0	0.0	0.0	0.0	0.0	0.0	0.0	0.0	0.0	0.0	46.0	0.0	28.0	0.0	0.0	0.0	0.0	0.0	0.0	0.0	0.0	0.0	0.0	0.0
d1b736fceb3a27282fd24b1bd9aec107	k__Bacteria; p__Bacteroidetes; c__Bacteroidia; o__Bacteroidales; f__Bacteroidaceae; g__Bacteroides; s__ovatus	0.0	0.0	45.0	33.0	37.0	0.0	0.0	0.0	14.0	0.0	39.0	39.0	0.0	0.0	0.0	95.0	18.0	0.0	0.0	6.0	0.0	81.0	0.0	0.0	0.0	14.0	30.0	0.0	0.0	0.0	0.0	31.0	24.0	0.0	2.0	14.0	37.0	0.0	38.0	0.0	0.0	0.0	36.0	38.0	0.0	14.0	0.0	0.0
7f71b4b56631fd91b04d03df65bf6bc1	k__Bacteria; p__Bacteroidetes; c__Bacteroidia; o__Bacteroidales; f__Bacteroidaceae; g__Bacteroides; s__ovatus	0.0	0.0	0.0	3.0	0.0	23.0	0.0	0.0	0.0	30.0	0.0	1.0	0.0	25.0	0.0	0.0	23.0	19.0	0.0	0.0	0.0	69.0	657.0	31.0	0.0	11.0	0.0	0.0	0.0	14.0	0.0	0.0	30.0	0.0	4.0	0.0	0.0	0.0	0.0	0.0	0.0	0.0	18.0	0.0	0.0	29.0	0.0	0.0
c51aa4e31caff440022977d9ed45e87c	k__Bacteria; p__Firmicutes; c__Clostridia; o__Clostridiales; f__Lachnospiraceae	37.0	38.0	0.0	47.0	0.0	10.0	64.0	23.0	0.0	35.0	49.0	58.0	34.0	71.0	55.0	53.0	38.0	45.0	64.0	88.0	32.0	40.0	49.0	60.0	53.0	37.0	72.0	40.0	37.0	44.0	30.0	26.0	29.0	0.0	232.0	52.0	36.0	73.0	68.0	0.0	47.0	89.0	43.0	84.0	67.0	98.0	0.0	34.0
806c895fc72f6678df86e43c9ee759b4	k__Bacteria; p__Firmicutes; c__Clostridia; o__Clostridiales; f__; g__; s__	0.0	0.0	0.0	0.0	0.0	0.0	0.0	0.0	0.0	0.0	0.0	29.0	0.0	0.0	0.0	60.0	0.0	0.0	33.0	0.0	0.0	0.0	35.0	0.0	0.0	16.0	0.0	0.0	0.0	0.0	0.0	0.0	0.0	0.0	0.0	24.0	28.0	16.0	0.0	0.0	0.0	0.0	0.0	0.0	0.0	0.0	0.0	0.0
d21de6eb5f852e6404c777123ef342cb	k__Bacteria; p__Bacteroidetes; c__Bacteroidia; o__Bacteroidales; f__[Odoribacteraceae]; g__Butyricimonas; s__	0.0	0.0	0.0	0.0	0.0	0.0	0.0	0.0	0.0	0.0	8.0	0.0	0.0	0.0	0.0	0.0	42.0	0.0	0.0	45.0	0.0	0.0	0.0	0.0	0.0	0.0	0.0	0.0	0.0	0.0	9.0	0.0	0.0	0.0	0.0	0.0	0.0	0.0	0.0	0.0	0.0	33.0	0.0	0.0	0.0	0.0	0.0	0.0
a13f4139fe724be06041aec7e9bc8413	k__Bacteria; p__Firmicutes; c__Clostridia; o__Clostridiales; f__Ruminococcaceae; g__Oscillospira; s__	0.0	0.0	0.0	0.0	0.0	0.0	0.0	0.0	0.0	0.0	40.0	0.0	54.0	0.0	35.0	0.0	0.0	0.0	0.0	0.0	0.0	0.0	0.0	0.0	0.0	0.0	30.0	0.0	13.0	0.0	0.0	0.0	0.0	0.0	0.0	0.0	0.0	97.0	0.0	0.0	0.0	229.0	98.0	43.0	0.0	76.0	0.0	0.0
b054f0faa31a284768e7fbdacdea9de2	k__Bacteria; p__Firmicutes; c__Clostridia; o__Clostridiales; f__Lachnospiraceae; g__Roseburia; s__	0.0	0.0	0.0	0.0	0.0	20.0	71.0	0.0	55.0	0.0	0.0	0.0	0.0	33.0	0.0	0.0	0.0	0.0	30.0	0.0	53.0	0.0	42.0	0.0	0.0	0.0	0.0	115.0	0.0	66.0	37.0	0.0	0.0	22.0	308.0	0.0	0.0	52.0	0.0	0.0	104.0	0.0	0.0	0.0	63.0	0.0	38.0	15.0
0faf1de28ebda0c5540c3be8443c4683	k__Bacteria; p__Firmicutes; c__Clostridia; o__Clostridiales; f__Lachnospiraceae	0.0	0.0	0.0	0.0	0.0	0.0	0.0	0.0	0.0	34.0	0.0	0.0	0.0	0.0	0.0	0.0	0.0	0.0	0.0	0.0	0.0	0.0	0.0	0.0	0.0	0.0	0.0	12.0	0.0	0.0	0.0	0.0	0.0	0.0	36.0	0.0	0.0	49.0	0.0	0.0	0.0	35.0	0.0	0.0	0.0	0.0	0.0	0.0
088e74ddaa4f3f1d0749ec7871d60e7c	k__Bacteria; p__Proteobacteria; c__Gammaproteobacteria; o__Enterobacteriales; f__Enterobacteriaceae	30.0	0.0	532.0	667.0	160.0	0.0	481.0	0.0	0.0	82.0	28.0	0.0	0.0	33.0	0.0	0.0	0.0	138.0	0.0	20.0	64.0	0.0	0.0	21.0	26.0	0.0	0.0	41.0	27.0	0.0	23.0	10.0	39.0	29.0	0.0	0.0	721.0	94.0	0.0	0.0	1268.0	189.0	18.0	0.0	0.0	32.0	19.0	23.0
03c8b95bcebf13253755cb35f8f5887e	k__Bacteria; p__Bacteroidetes; c__Bacteroidia; o__Bacteroidales; f__Porphyromonadaceae; g__Parabacteroides; s__distasonis	0.0	0.0	0.0	0.0	0.0	0.0	0.0	78.0	0.0	0.0	0.0	0.0	0.0	0.0	0.0	0.0	0.0	0.0	0.0	0.0	0.0	0.0	0.0	0.0	0.0	0.0	0.0	0.0	0.0	0.0	0.0	0.0	0.0	0.0	0.0	0.0	0.0	0.0	0.0	0.0	0.0	0.0	52.0	109.0	0.0	0.0	0.0	0.0
3bd6946af9d74e867572da66d502447e	k__Bacteria; p__Firmicutes; c__Clostridia; o__Clostridiales; f__Lachnospiraceae; g__Coprococcus; s__	0.0	0.0	40.0	48.0	11.0	42.0	17.0	0.0	11.0	47.0	0.0	0.0	32.0	0.0	0.0	8.0	0.0	0.0	37.0	31.0	37.0	0.0	22.0	0.0	0.0	21.0	0.0	0.0	0.0	27.0	26.0	72.0	0.0	0.0	51.0	0.0	0.0	38.0	0.0	38.0	30.0	0.0	12.0	0.0	71.0	39.0	0.0	0.0
e6c9829e1c9c36aff0abd08cba6a203f	k__Bacteria; p__Bacteroidetes; c__Bacteroidia; o__Bacteroidales; f__Bacteroidaceae; g__Bacteroides; s__caccae	30.0	0.0	0.0	0.0	0.0	0.0	0.0	0.0	29.0	0.0	0.0	98.0	0.0	0.0	0.0	0.0	0.0	0.0	0.0	0.0	0.0	0.0	0.0	0.0	0.0	0.0	0.0	0.0	40.0	0.0	0.0	0.0	0.0	0.0	255.0	0.0	284.0	0.0	0.0	0.0	0.0	0.0	145.0	0.0	0.0	45.0	0.0	0.0
40eb61345e0de231eb43e6df962a7c46	k__Bacteria; p__Firmicutes; c__Clostridia; o__Clostridiales; f__Ruminococcaceae; g__Oscillospira; s__	0.0	0.0	0.0	0.0	0.0	0.0	0.0	0.0	0.0	0.0	0.0	0.0	0.0	0.0	0.0	0.0	0.0	0.0	15.0	0.0	0.0	0.0	24.0	0.0	0.0	0.0	0.0	0.0	0.0	0.0	0.0	31.0	34.0	0.0	0.0	0.0	0.0	0.0	0.0	0.0	12.0	0.0	0.0	0.0	0.0	9.0	0.0	0.0
fb2fbbde5291f12f62449c37f75ef660	k__Bacteria; p__Firmicutes; c__Clostridia; o__Clostridiales; f__Lachnospiraceae	0.0	0.0	0.0	0.0	0.0	0.0	45.0	0.0	0.0	0.0	0.0	0.0	0.0	0.0	0.0	50.0	0.0	0.0	0.0	0.0	58.0	0.0	0.0	0.0	94.0	0.0	0.0	0.0	0.0	0.0	0.0	0.0	0.0	0.0	0.0	0.0	0.0	0.0	0.0	0.0	0.0	0.0	0.0	0.0	0.0	0.0	0.0	0.0
4995a1534ab227480cb35facf9a68be6	k__Bacteria; p__Firmicutes; c__Clostridia; o__Clostridiales; f__Lachnospiraceae; g__Clostridium; s__aldenense	0.0	0.0	0.0	0.0	32.0	0.0	0.0	0.0	0.0	0.0	0.0	0.0	0.0	0.0	0.0	57.0	0.0	0.0	0.0	0.0	0.0	0.0	0.0	0.0	0.0	0.0	0.0	0.0	0.0	0.0	0.0	0.0	0.0	0.0	0.0	0.0	0.0	0.0	0.0	0.0	0.0	0.0	0.0	0.0	0.0	0.0	0.0	0.0
4e36c0b2ad2ad802a8b4b27c334395f0	k__Bacteria; p__Firmicutes; c__Bacilli; o__Lactobacillales; f__Streptococcaceae; g__Streptococcus	0.0	0.0	0.0	0.0	0.0	0.0	0.0	0.0	0.0	0.0	0.0	0.0	0.0	0.0	0.0	0.0	0.0	0.0	0.0	0.0	0.0	0.0	0.0	0.0	0.0	0.0	0.0	21.0	0.0	0.0	0.0	0.0	0.0	0.0	0.0	0.0	0.0	16.0	0.0	0.0	40.0	0.0	0.0	0.0	0.0	0.0	0.0	3.0
c5e73cfe6ca4baa47192d96a39f7db80	k__Bacteria; p__Verrucomicrobia; c__Verrucomicrobiae; o__Verrucomicrobiales; f__Verrucomicrobiaceae; g__Akkermansia; s__muciniphila	0.0	0.0	0.0	0.0	0.0	0.0	0.0	0.0	0.0	0.0	0.0	0.0	0.0	0.0	0.0	37.0	0.0	0.0	0.0	50.0	0.0	0.0	0.0	0.0	0.0	0.0	0.0	0.0	0.0	0.0	0.0	41.0	0.0	0.0	0.0	0.0	0.0	0.0	0.0	0.0	0.0	718.0	0.0	0.0	0.0	0.0	0.0	0.0
21213a21ccc4c236dae3dfa1c52b2d47	k__Bacteria; p__Bacteroidetes; c__Bacteroidia; o__Bacteroidales; f__Porphyromonadaceae; g__Parabacteroides; s__	27.0	67.0	0.0	0.0	640.0	57.0	22.0	168.0	0.0	266.0	22.0	0.0	37.0	75.0	66.0	45.0	42.0	49.0	92.0	86.0	590.0	0.0	0.0	186.0	124.0	0.0	100.0	0.0	33.0	0.0	0.0	95.0	0.0	47.0	934.0	508.0	929.0	74.0	129.0	0.0	612.0	100.0	249.0	40.0	42.0	0.0	21.0	0.0
28ea7e39ae53a4b8f90c363101e905ad	k__Bacteria; p__Firmicutes; c__Clostridia; o__Clostridiales; f__Ruminococcaceae; g__Oscillospira; s__	0.0	0.0	0.0	0.0	0.0	36.0	0.0	0.0	0.0	72.0	0.0	22.0	0.0	28.0	0.0	0.0	0.0	0.0	0.0	0.0	0.0	0.0	0.0	0.0	0.0	0.0	4.0	0.0	0.0	0.0	13.0	0.0	0.0	0.0	0.0	0.0	0.0	0.0	0.0	0.0	0.0	0.0	0.0	0.0	0.0	0.0	0.0	46.0
0da682bb2adc4f6790290bd73c5d7101	k__Bacteria; p__Bacteroidetes; c__Bacteroidia; o__Bacteroidales; f__[Barnesiellaceae]	0.0	0.0	0.0	0.0	0.0	0.0	0.0	104.0	0.0	0.0	0.0	116.0	0.0	0.0	0.0	174.0	80.0	56.0	0.0	0.0	51.0	0.0	0.0	0.0	0.0	0.0	0.0	0.0	0.0	0.0	0.0	64.0	0.0	0.0	0.0	0.0	0.0	0.0	0.0	0.0	0.0	0.0	0.0	0.0	158.0	0.0	0.0	0.0
bf9b72dfb45319e91d94fa35f858df55	k__Bacteria; p__Firmicutes; c__Bacilli; o__Lactobacillales; f__Streptococcaceae; g__Streptococcus; s__	0.0	0.0	0.0	0.0	0.0	0.0	0.0	7.0	1.0	0.0	0.0	0.0	0.0	0.0	0.0	0.0	0.0	15.0	0.0	0.0	0.0	0.0	0.0	0.0	0.0	0.0	0.0	0.0	0.0	0.0	0.0	12.0	0.0	0.0	0.0	0.0	0.0	3.0	0.0	0.0	4.0	0.0	0.0	0.0	0.0	0.0	0.0	0.0
ca26020339a59d5ba404fcd7a0f07f24	k__Bacteria; p__Bacteroidetes; c__Bacteroidia; o__Bacteroidales; f__Bacteroidaceae; g__Bacteroides; s__	22.0	473.0	12.0	0.0	59.0	109.0	0.0	52.0	30.0	176.0	32.0	72.0	0.0	0.0	74.0	0.0	12.0	23.0	0.0	290.0	0.0	0.0	513.0	0.0	0.0	0.0	0.0	19.0	56.0	245.0	134.0	208.0	41.0	15.0	0.0	437.0	286.0	593.0	102.0	264.0	0.0	181.0	7.0	18.0	186.0	23.0	210.0	3178.0
82e7efcfcb2230ee91ef9d9701581d33	k__Bacteria; p__OD1	0.0	90.0	0.0	0.0	79.0	0.0	0.0	111.0	0.0	0.0	0.0	0.0	0.0	0.0	0.0	0.0	0.0	0.0	0.0	0.0	0.0	0.0	0.0	0.0	0.0	0.0	0.0	0.0	0.0	0.0	0.0	0.0	0.0	0.0	0.0	0.0	0.0	15.0	0.0	0.0	0.0	0.0	0.0	0.0	0.0	2.0	0.0	0.0
78e5b647616efc2db1bf40d31d9f0242	k__Bacteria; p__Bacteroidetes; c__Bacteroidia; o__Bacteroidales; f__[Barnesiellaceae]; g__; s__	0.0	0.0	0.0	0.0	0.0	0.0	0.0	0.0	0.0	0.0	48.0	0.0	0.0	20.0	0.0	0.0	0.0	0.0	0.0	0.0	0.0	0.0	0.0	0.0	0.0	0.0	0.0	0.0	79.0	0.0	0.0	0.0	0.0	0.0	0.0	0.0	0.0	0.0	0.0	0.0	0.0	115.0	0.0	73.0	0.0	0.0	79.0	0.0
f9c72b4691434677b1c45efd7be9779a	k__Bacteria; p__Firmicutes; c__Clostridia; o__Clostridiales; f__Ruminococcaceae; g__Oscillospira; s__	0.0	30.0	0.0	0.0	0.0	40.0	0.0	0.0	0.0	69.0	0.0	7.0	0.0	0.0	19.0	25.0	0.0	0.0	28.0	0.0	0.0	0.0	0.0	0.0	0.0	0.0	0.0	0.0	0.0	0.0	0.0	0.0	0.0	0.0	58.0	79.0	25.0	0.0	49.0	0.0	0.0	44.0	37.0	0.0	0.0	0.0	12.0	0.0
c4c5dabab7e8b80944be93cda9d3d83f	k__Bacteria; p__Bacteroidetes; c__Bacteroidia; o__Bacteroidales; f__Rikenellaceae; g__; s__	0.0	0.0	0.0	0.0	0.0	0.0	0.0	0.0	0.0	0.0	0.0	18.0	0.0	0.0	0.0	52.0	0.0	0.0	49.0	0.0	0.0	0.0	0.0	0.0	0.0	0.0	0.0	0.0	0.0	0.0	79.0	0.0	0.0	0.0	0.0	0.0	0.0	0.0	0.0	0.0	0.0	0.0	0.0	0.0	0.0	0.0	0.0	0.0
476f591fe276f97cf80d6d7857ce327a	k__Bacteria; p__Firmicutes; c__Clostridia; o__Clostridiales; f__Ruminococcaceae; g__Ruminococcus; s__bromii	0.0	37.0	0.0	0.0	0.0	50.0	0.0	0.0	188.0	98.0	19.0	28.0	0.0	0.0	0.0	0.0	0.0	24.0	3.0	35.0	156.0	0.0	0.0	64.0	41.0	0.0	12.0	0.0	0.0	0.0	0.0	0.0	0.0	26.0	0.0	0.0	4.0	339.0	0.0	0.0	39.0	0.0	0.0	55.0	0.0	0.0	0.0	0.0
cd71b063b5d713f6449b7ec9f5290609	k__Bacteria; p__Bacteroidetes; c__Bacteroidia; o__Bacteroidales; f__Prevotellaceae; g__Prevotella; s__	16.0	0.0	0.0	0.0	0.0	0.0	23.0	0.0	0.0	0.0	0.0	0.0	0.0	0.0	0.0	61.0	66.0	0.0	0.0	0.0	0.0	0.0	0.0	0.0	0.0	0.0	0.0	0.0	0.0	0.0	0.0	0.0	0.0	0.0	146.0	17.0	0.0	0.0	0.0	0.0	0.0	0.0	189.0	0.0	0.0	0.0	0.0	122.0
27bcf66bf64665af93801f20a6b4237f	k__Bacteria; p__Bacteroidetes; c__Bacteroidia; o__Bacteroidales; f__Prevotellaceae; g__Prevotella; s__	0.0	0.0	0.0	0.0	0.0	0.0	0.0	52.0	0.0	0.0	0.0	0.0	0.0	0.0	0.0	0.0	0.0	0.0	0.0	0.0	0.0	0.0	0.0	0.0	0.0	0.0	0.0	0.0	0.0	0.0	0.0	0.0	0.0	0.0	0.0	0.0	0.0	0.0	106.0	0.0	0.0	0.0	49.0	0.0	0.0	0.0	0.0	0.0
f7029021b7e1dbfa5f64b5106266aa80	k__Bacteria; p__Firmicutes; c__Clostridia; o__Clostridiales; f__Ruminococcaceae; g__Oscillospira; s__	0.0	0.0	0.0	0.0	0.0	0.0	0.0	0.0	0.0	0.0	0.0	24.0	0.0	0.0	0.0	0.0	0.0	0.0	0.0	0.0	53.0	49.0	31.0	0.0	0.0	0.0	51.0	0.0	0.0	40.0	0.0	0.0	0.0	0.0	0.0	0.0	60.0	0.0	22.0	50.0	0.0	0.0	0.0	21.0	0.0	0.0	0.0	0.0
e3d99da3e2a3463676922f3f330b56af	k__Bacteria; p__Firmicutes; c__Clostridia; o__Clostridiales; f__Ruminococcaceae; g__Ruminococcus; s__	0.0	0.0	0.0	0.0	22.0	0.0	0.0	0.0	0.0	19.0	0.0	0.0	0.0	0.0	0.0	0.0	0.0	0.0	0.0	0.0	0.0	0.0	0.0	0.0	0.0	0.0	20.0	0.0	0.0	17.0	0.0	0.0	0.0	28.0	0.0	30.0	0.0	33.0	0.0	0.0	0.0	0.0	0.0	0.0	0.0	0.0	0.0	0.0
1f388a466c7666444e40a87071b93b4e	k__Bacteria; p__Firmicutes; c__Clostridia; o__Clostridiales; f__Lachnospiraceae	19.0	0.0	0.0	0.0	0.0	41.0	0.0	0.0	0.0	0.0	0.0	0.0	0.0	0.0	0.0	0.0	0.0	0.0	0.0	0.0	0.0	0.0	38.0	0.0	0.0	0.0	0.0	0.0	0.0	0.0	0.0	0.0	0.0	0.0	28.0	0.0	0.0	32.0	0.0	0.0	0.0	0.0	0.0	0.0	0.0	0.0	0.0	0.0
4423efb65c01e7bc5c29805e04b55258	k__Bacteria; p__Firmicutes; c__Clostridia; o__Clostridiales; f__Lachnospiraceae; g__Roseburia	42.0	123.0	0.0	63.0	33.0	154.0	12.0	191.0	0.0	826.0	0.0	143.0	0.0	22.0	75.0	0.0	21.0	29.0	95.0	0.0	133.0	35.0	0.0	162.0	620.0	63.0	33.0	59.0	0.0	23.0	0.0	25.0	0.0	0.0	163.0	58.0	50.0	0.0	48.0	0.0	0.0	0.0	59.0	62.0	68.0	29.0	55.0	0.0
c813c0e6ff7aff26eb6f238b7eb72247	k__Bacteria; p__Bacteroidetes; c__Bacteroidia; o__Bacteroidales; f__Rikenellaceae; g__; s__	0.0	38.0	0.0	0.0	0.0	0.0	0.0	0.0	0.0	0.0	0.0	0.0	0.0	0.0	0.0	0.0	0.0	0.0	0.0	0.0	0.0	0.0	0.0	0.0	0.0	0.0	0.0	0.0	0.0	0.0	0.0	33.0	0.0	0.0	0.0	0.0	0.0	44.0	0.0	0.0	0.0	22.0	0.0	0.0	22.0	0.0	0.0	0.0
0b17bde99b913b7fa05fa8d262a82a59	k__Bacteria; p__Firmicutes; c__Clostridia; o__Clostridiales; f__Ruminococcaceae; g__Oscillospira; s__	0.0	0.0	0.0	0.0	16.0	0.0	0.0	0.0	0.0	0.0	0.0	0.0	0.0	0.0	0.0	23.0	0.0	0.0	0.0	0.0	0.0	0.0	0.0	15.0	0.0	0.0	0.0	0.0	0.0	44.0	0.0	0.0	0.0	0.0	0.0	38.0	0.0	0.0	0.0	36.0	0.0	0.0	0.0	0.0	0.0	0.0	0.0	25.0
ed05063019bb7fc4670f4a20a6618ab1	k__Bacteria; p__Firmicutes; c__Clostridia; o__Clostridiales; f__Lachnospiraceae	0.0	0.0	0.0	0.0	312.0	0.0	0.0	0.0	0.0	0.0	0.0	0.0	0.0	0.0	0.0	0.0	0.0	0.0	0.0	0.0	0.0	0.0	0.0	0.0	0.0	0.0	0.0	0.0	0.0	0.0	0.0	0.0	0.0	0.0	48.0	17.0	0.0	45.0	0.0	0.0	0.0	29.0	0.0	0.0	0.0	0.0	0.0	11.0
77d4a6a5b5326c18aac6d9a012bf1953	k__Bacteria; p__TM7; c__TM7-3; o__; f__; g__; s__	0.0	22.0	0.0	0.0	35.0	0.0	0.0	0.0	0.0	0.0	0.0	0.0	0.0	0.0	0.0	0.0	0.0	0.0	7.0	0.0	32.0	0.0	0.0	0.0	0.0	0.0	0.0	0.0	0.0	0.0	0.0	0.0	0.0	0.0	0.0	0.0	0.0	0.0	0.0	0.0	29.0	0.0	0.0	0.0	0.0	0.0	0.0	0.0
f7c13e2433ace03196b06493457da554	k__Bacteria; p__Firmicutes; c__Clostridia; o__Clostridiales; f__; g__; s__	0.0	0.0	0.0	0.0	0.0	0.0	0.0	0.0	0.0	0.0	0.0	0.0	0.0	0.0	0.0	0.0	0.0	42.0	0.0	0.0	0.0	0.0	0.0	0.0	0.0	0.0	44.0	0.0	0.0	0.0	0.0	0.0	0.0	0.0	133.0	0.0	0.0	0.0	38.0	0.0	0.0	0.0	0.0	0.0	0.0	0.0	0.0	0.0
7fae5eb453525faa1e31fd20317c02d1	k__Bacteria; p__Firmicutes; c__Clostridia; o__Clostridiales; f__; g__; s__	0.0	0.0	0.0	0.0	0.0	0.0	0.0	0.0	0.0	0.0	0.0	0.0	0.0	0.0	0.0	0.0	0.0	59.0	0.0	0.0	0.0	0.0	0.0	0.0	0.0	0.0	42.0	0.0	0.0	0.0	0.0	0.0	0.0	0.0	128.0	0.0	0.0	0.0	51.0	0.0	0.0	0.0	0.0	0.0	0.0	0.0	0.0	0.0
e5ab0428eef74e9c2752bf571571ceab	k__Bacteria; p__Bacteroidetes; c__Bacteroidia; o__Bacteroidales; f__Porphyromonadaceae; g__Parabacteroides; s__distasonis	0.0	0.0	0.0	0.0	0.0	0.0	0.0	0.0	0.0	30.0	0.0	0.0	0.0	0.0	0.0	0.0	0.0	0.0	0.0	0.0	0.0	0.0	0.0	0.0	0.0	0.0	0.0	0.0	0.0	0.0	46.0	0.0	0.0	0.0	0.0	0.0	0.0	0.0	0.0	0.0	0.0	0.0	0.0	0.0	0.0	0.0	0.0	0.0
b6e5b13628389831bf6850f4ac45d03d	k__Bacteria; p__Firmicutes; c__Clostridia; o__Clostridiales; f__Ruminococcaceae; g__Faecalibacterium; s__prausnitzii	0.0	0.0	0.0	0.0	0.0	8.0	0.0	0.0	0.0	0.0	0.0	0.0	0.0	31.0	0.0	42.0	0.0	0.0	0.0	0.0	0.0	0.0	0.0	0.0	0.0	0.0	0.0	0.0	0.0	0.0	42.0	0.0	0.0	0.0	0.0	0.0	0.0	0.0	0.0	0.0	0.0	0.0	0.0	0.0	0.0	0.0	14.0	0.0
4cccdbac83d68baa46098528127355ed	k__Bacteria; p__Bacteroidetes; c__Bacteroidia; o__Bacteroidales; f__[Barnesiellaceae]	0.0	0.0	0.0	0.0	0.0	0.0	0.0	168.0	0.0	0.0	0.0	68.0	0.0	0.0	0.0	114.0	38.0	36.0	0.0	0.0	56.0	0.0	0.0	0.0	0.0	0.0	0.0	0.0	0.0	0.0	0.0	26.0	0.0	0.0	0.0	0.0	0.0	0.0	0.0	0.0	0.0	0.0	0.0	0.0	67.0	0.0	0.0	0.0
060d0e834bb227bd0933bf9e145181de	k__Bacteria; p__Bacteroidetes; c__Bacteroidia; o__Bacteroidales; f__Bacteroidaceae; g__Bacteroides	0.0	0.0	0.0	0.0	0.0	0.0	182.0	0.0	0.0	0.0	0.0	0.0	0.0	36.0	0.0	0.0	0.0	0.0	0.0	0.0	0.0	0.0	0.0	0.0	0.0	0.0	0.0	0.0	23.0	110.0	0.0	0.0	0.0	0.0	0.0	37.0	0.0	0.0	0.0	0.0	0.0	0.0	0.0	0.0	0.0	0.0	0.0	0.0
feaf58fed5141d56c1286651b9099006	k__Bacteria; p__Bacteroidetes; c__Bacteroidia; o__Bacteroidales; f__Bacteroidaceae; g__Bacteroides; s__	0.0	0.0	0.0	0.0	0.0	0.0	0.0	0.0	0.0	0.0	0.0	0.0	0.0	0.0	0.0	0.0	0.0	0.0	0.0	0.0	0.0	32.0	0.0	0.0	0.0	0.0	0.0	0.0	0.0	0.0	0.0	0.0	0.0	0.0	0.0	18.0	0.0	0.0	63.0	0.0	0.0	0.0	0.0	0.0	0.0	0.0	0.0	0.0
a0faad30a91ad16f9fbf4d0a75b4de6b	k__Bacteria; p__Firmicutes; c__Clostridia; o__Clostridiales; f__Lachnospiraceae	0.0	45.0	0.0	0.0	0.0	52.0	44.0	0.0	0.0	80.0	0.0	0.0	0.0	0.0	52.0	0.0	38.0	0.0	37.0	0.0	38.0	47.0	58.0	0.0	51.0	26.0	11.0	0.0	0.0	0.0	0.0	0.0	0.0	0.0	45.0	0.0	0.0	196.0	0.0	0.0	0.0	0.0	80.0	0.0	0.0	0.0	0.0	0.0
ec728ae9756332c08065b116b97f2de3	k__Bacteria; p__Firmicutes; c__Clostridia; o__Clostridiales; f__Lachnospiraceae; g__; s__	0.0	0.0	0.0	0.0	0.0	0.0	0.0	0.0	0.0	0.0	0.0	0.0	0.0	0.0	34.0	0.0	0.0	0.0	0.0	41.0	0.0	0.0	0.0	36.0	0.0	0.0	39.0	34.0	0.0	0.0	0.0	0.0	0.0	0.0	16.0	26.0	0.0	0.0	0.0	0.0	0.0	0.0	0.0	0.0	0.0	0.0	63.0	7.0
ddf943aa5b10203a3ae9a5dbf205390b	k__Bacteria; p__Actinobacteria; c__Actinobacteria; o__Bifidobacteriales; f__Bifidobacteriaceae; g__Bifidobacterium; s__longum	0.0	0.0	0.0	0.0	2.0	0.0	1.0	0.0	2.0	0.0	0.0	0.0	34.0	30.0	0.0	0.0	21.0	0.0	0.0	0.0	0.0	0.0	0.0	0.0	0.0	24.0	0.0	0.0	14.0	0.0	0.0	0.0	10.0	0.0	18.0	0.0	28.0	5.0	3.0	0.0	5.0	0.0	0.0	0.0	0.0	27.0	0.0	0.0
c173636b230b321006101dca1e684173	k__Bacteria; p__Bacteroidetes; c__Bacteroidia; o__Bacteroidales; f__Bacteroidaceae; g__Bacteroides; s__	0.0	0.0	0.0	0.0	0.0	0.0	0.0	0.0	0.0	0.0	0.0	0.0	0.0	0.0	0.0	0.0	0.0	0.0	0.0	0.0	0.0	0.0	0.0	0.0	0.0	0.0	0.0	0.0	0.0	0.0	0.0	0.0	0.0	0.0	0.0	0.0	66.0	0.0	0.0	0.0	0.0	16.0	0.0	0.0	0.0	0.0	0.0	0.0
a9de91d63f729b55b199af9eaede8273	k__Bacteria; p__Firmicutes; c__Clostridia; o__Clostridiales; f__Ruminococcaceae; g__Faecalibacterium; s__prausnitzii	0.0	62.0	0.0	25.0	0.0	14.0	111.0	28.0	119.0	134.0	25.0	46.0	28.0	31.0	212.0	102.0	28.0	71.0	47.0	50.0	0.0	38.0	442.0	135.0	0.0	49.0	35.0	92.0	0.0	36.0	312.0	55.0	0.0	0.0	484.0	59.0	97.0	0.0	73.0	0.0	0.0	15.0	114.0	104.0	80.0	67.0	11.0	206.0
1234d0c2b6f7692da6d310d72b62a5d1	k__Bacteria; p__Firmicutes; c__Clostridia; o__Clostridiales; f__Ruminococcaceae	0.0	0.0	0.0	0.0	0.0	0.0	0.0	0.0	0.0	0.0	0.0	0.0	0.0	0.0	0.0	0.0	0.0	0.0	0.0	0.0	0.0	0.0	0.0	0.0	0.0	0.0	0.0	0.0	0.0	0.0	0.0	0.0	0.0	0.0	38.0	0.0	0.0	0.0	0.0	0.0	0.0	30.0	0.0	0.0	0.0	0.0	0.0	0.0
3a0ec6b4e85ce37c07d3675a1f89008d	k__Bacteria; p__Firmicutes; c__Clostridia; o__Clostridiales; f__Lachnospiraceae; g__; s__	0.0	27.0	0.0	23.0	0.0	48.0	0.0	0.0	0.0	60.0	0.0	108.0	0.0	94.0	38.0	72.0	0.0	0.0	125.0	0.0	0.0	0.0	38.0	36.0	0.0	129.0	54.0	42.0	0.0	25.0	0.0	61.0	0.0	0.0	39.0	53.0	0.0	0.0	58.0	52.0	0.0	22.0	59.0	40.0	50.0	0.0	64.0	28.0
f7deb0f902b0314db0dddb0681e137e4	k__Bacteria; p__Bacteroidetes; c__Bacteroidia; o__Bacteroidales; f__Porphyromonadaceae; g__Parabacteroides; s__	0.0	0.0	0.0	0.0	0.0	0.0	0.0	0.0	0.0	0.0	0.0	47.0	0.0	0.0	0.0	38.0	0.0	0.0	0.0	0.0	0.0	0.0	0.0	0.0	0.0	0.0	0.0	0.0	0.0	0.0	0.0	19.0	0.0	35.0	21.0	0.0	0.0	92.0	0.0	0.0	0.0	0.0	0.0	0.0	0.0	0.0	0.0	0.0
31ab276b812608549ec393b4d50f3e0d	k__Bacteria; p__Bacteroidetes; c__Bacteroidia; o__Bacteroidales; f__Rikenellaceae; g__; s__	0.0	0.0	0.0	0.0	47.0	0.0	0.0	0.0	0.0	33.0	0.0	45.0	0.0	0.0	0.0	583.0	91.0	0.0	0.0	0.0	0.0	0.0	0.0	0.0	286.0	53.0	0.0	0.0	0.0	38.0	0.0	0.0	0.0	0.0	73.0	0.0	0.0	0.0	0.0	0.0	0.0	0.0	0.0	0.0	0.0	0.0	37.0	0.0
637973320bead6fd8b4787a327eaff35	k__Bacteria; p__Firmicutes; c__Clostridia; o__Clostridiales; f__Lachnospiraceae; g__Clostridium; s__symbiosum	0.0	0.0	0.0	0.0	0.0	0.0	0.0	0.0	0.0	0.0	0.0	0.0	0.0	0.0	0.0	30.0	0.0	0.0	0.0	0.0	0.0	0.0	0.0	0.0	0.0	0.0	0.0	0.0	0.0	0.0	0.0	0.0	0.0	0.0	0.0	0.0	0.0	0.0	0.0	0.0	0.0	0.0	0.0	0.0	0.0	0.0	0.0	65.0
2364d5bd89a0e102671752f01374552b	k__Bacteria; p__Firmicutes; c__Bacilli; o__Lactobacillales; f__Streptococcaceae; g__Streptococcus	0.0	0.0	0.0	0.0	0.0	0.0	0.0	0.0	0.0	0.0	0.0	0.0	0.0	0.0	0.0	0.0	28.0	0.0	0.0	0.0	0.0	0.0	0.0	0.0	0.0	0.0	0.0	0.0	0.0	0.0	0.0	0.0	0.0	0.0	0.0	0.0	0.0	18.0	0.0	0.0	83.0	0.0	0.0	0.0	0.0	0.0	0.0	10.0
9ea428ffd2e0752df8f28077216801ca	k__Bacteria; p__Bacteroidetes; c__Bacteroidia; o__Bacteroidales; f__Bacteroidaceae; g__Bacteroides; s__	0.0	48.0	0.0	0.0	0.0	0.0	0.0	0.0	104.0	66.0	24.0	0.0	0.0	0.0	50.0	0.0	23.0	0.0	110.0	0.0	0.0	0.0	0.0	0.0	0.0	322.0	29.0	0.0	0.0	0.0	0.0	0.0	0.0	0.0	0.0	0.0	0.0	206.0	91.0	0.0	0.0	22.0	0.0	109.0	65.0	0.0	0.0	0.0
019bacfef06bf4e6ba8f38421dfa0c2c	k__Bacteria; p__Firmicutes; c__Clostridia; o__Clostridiales; f__Ruminococcaceae; g__; s__	0.0	0.0	0.0	0.0	69.0	0.0	0.0	0.0	0.0	0.0	0.0	0.0	0.0	0.0	0.0	0.0	0.0	0.0	0.0	0.0	0.0	0.0	0.0	0.0	0.0	0.0	0.0	0.0	0.0	0.0	0.0	0.0	0.0	0.0	0.0	0.0	0.0	29.0	0.0	0.0	0.0	0.0	0.0	0.0	0.0	0.0	0.0	0.0
ce6574995c5e0a222b51943984c138e3	k__Bacteria; p__Firmicutes; c__Clostridia; o__Clostridiales; f__Veillonellaceae; g__Acidaminococcus; s__	0.0	0.0	0.0	0.0	0.0	0.0	0.0	91.0	0.0	102.0	0.0	0.0	0.0	21.0	39.0	0.0	0.0	0.0	0.0	0.0	0.0	0.0	0.0	0.0	0.0	0.0	0.0	0.0	0.0	0.0	0.0	0.0	0.0	0.0	0.0	0.0	0.0	0.0	0.0	0.0	0.0	0.0	0.0	50.0	67.0	0.0	0.0	19.0
eea637272b2e783e31fbcbea55f2abe3	k__Bacteria; p__Firmicutes; c__Clostridia; o__Clostridiales; f__Ruminococcaceae; g__Oscillospira; s__	22.0	39.0	0.0	0.0	0.0	54.0	0.0	0.0	0.0	0.0	7.0	50.0	0.0	60.0	88.0	74.0	116.0	31.0	0.0	36.0	0.0	0.0	0.0	51.0	0.0	120.0	27.0	0.0	28.0	32.0	74.0	0.0	10.0	34.0	209.0	64.0	0.0	0.0	45.0	39.0	0.0	86.0	120.0	50.0	36.0	0.0	52.0	73.0
b4b19ceffc3bc3c4efc34484059f51b5	k__Bacteria; p__Firmicutes; c__Clostridia; o__Clostridiales; f__Lachnospiraceae; g__; s__	54.0	28.0	0.0	20.0	0.0	0.0	0.0	30.0	0.0	0.0	0.0	19.0	0.0	0.0	0.0	0.0	20.0	0.0	0.0	17.0	0.0	0.0	0.0	0.0	0.0	0.0	0.0	0.0	0.0	0.0	0.0	0.0	0.0	0.0	24.0	5.0	0.0	0.0	23.0	239.0	0.0	43.0	41.0	0.0	19.0	71.0	0.0	0.0
9e297f73eb8d4d1b1405363286efc877	k__Bacteria; p__Firmicutes; c__Clostridia; o__Clostridiales; f__Lachnospiraceae; g__Blautia; s__	0.0	0.0	0.0	5.0	0.0	0.0	0.0	27.0	63.0	47.0	0.0	37.0	77.0	12.0	43.0	42.0	0.0	125.0	60.0	70.0	44.0	0.0	105.0	36.0	47.0	53.0	49.0	0.0	39.0	67.0	73.0	0.0	0.0	67.0	78.0	25.0	39.0	57.0	0.0	68.0	25.0	66.0	43.0	43.0	0.0	0.0	29.0	29.0
0b37ab9fd5db07cee3d3be42b4c2446f	k__Bacteria; p__Firmicutes; c__Bacilli; o__Turicibacterales; f__Turicibacteraceae; g__Turicibacter; s__	0.0	0.0	0.0	0.0	26.0	0.0	0.0	0.0	31.0	0.0	0.0	0.0	0.0	0.0	0.0	0.0	0.0	48.0	0.0	0.0	0.0	0.0	0.0	0.0	0.0	0.0	0.0	34.0	0.0	0.0	0.0	0.0	52.0	0.0	136.0	0.0	28.0	4.0	0.0	0.0	59.0	0.0	0.0	0.0	0.0	0.0	84.0	29.0
5116fe2d35e274e6234d7473a0decb42	k__Bacteria; p__Firmicutes; c__Clostridia; o__Clostridiales; f__Lachnospiraceae	0.0	0.0	0.0	0.0	0.0	0.0	0.0	0.0	0.0	0.0	0.0	0.0	0.0	0.0	0.0	34.0	0.0	0.0	0.0	0.0	32.0	0.0	0.0	0.0	58.0	0.0	0.0	0.0	0.0	0.0	0.0	0.0	0.0	0.0	0.0	0.0	0.0	0.0	0.0	0.0	0.0	0.0	0.0	0.0	0.0	0.0	0.0	0.0
7129f24939c1839eafb1aa9159cf29b7	k__Bacteria; p__Firmicutes; c__Clostridia; o__Clostridiales; f__Lachnospiraceae; g__Coprococcus; s__	0.0	0.0	0.0	0.0	0.0	0.0	0.0	0.0	0.0	0.0	16.0	0.0	0.0	94.0	0.0	43.0	0.0	51.0	0.0	0.0	0.0	0.0	0.0	0.0	0.0	58.0	105.0	0.0	0.0	0.0	0.0	0.0	0.0	0.0	0.0	108.0	0.0	0.0	0.0	0.0	0.0	0.0	0.0	0.0	0.0	0.0	0.0	0.0
802a9664d1e07ab6a0b4cd68e4234ab3	k__Bacteria; p__Firmicutes; c__Clostridia; o__Clostridiales; f__Ruminococcaceae; g__Oscillospira; s__	0.0	0.0	0.0	0.0	0.0	23.0	0.0	0.0	0.0	56.0	0.0	26.0	0.0	12.0	0.0	0.0	0.0	0.0	0.0	0.0	0.0	0.0	0.0	0.0	0.0	62.0	5.0	0.0	0.0	0.0	48.0	0.0	0.0	0.0	0.0	0.0	0.0	45.0	19.0	0.0	0.0	0.0	0.0	0.0	0.0	0.0	0.0	44.0
dd3e5077c9f62881c05387a4c9656e81	k__Bacteria; p__Firmicutes; c__Bacilli; o__Turicibacterales; f__Turicibacteraceae; g__Turicibacter; s__	0.0	0.0	0.0	0.0	46.0	0.0	0.0	0.0	35.0	0.0	0.0	0.0	0.0	25.0	0.0	0.0	0.0	20.0	0.0	0.0	0.0	0.0	0.0	0.0	0.0	0.0	0.0	50.0	0.0	0.0	0.0	0.0	0.0	0.0	115.0	0.0	0.0	30.0	0.0	0.0	25.0	0.0	0.0	0.0	0.0	0.0	43.0	25.0
90320866850430cd2fe3e548170be765	k__Bacteria; p__Proteobacteria; c__Betaproteobacteria; o__Burkholderiales; f__Alcaligenaceae; g__Sutterella; s__	0.0	0.0	0.0	0.0	0.0	0.0	0.0	0.0	0.0	0.0	0.0	0.0	0.0	0.0	0.0	0.0	0.0	0.0	0.0	0.0	0.0	0.0	0.0	0.0	0.0	45.0	0.0	61.0	0.0	0.0	44.0	42.0	0.0	0.0	0.0	0.0	0.0	0.0	0.0	0.0	0.0	0.0	0.0	0.0	64.0	0.0	0.0	0.0
9d6664e59fa7629d620748763156d32b	k__Bacteria; p__Bacteroidetes; c__Bacteroidia; o__Bacteroidales; f__[Paraprevotellaceae]; g__Paraprevotella; s__	0.0	0.0	0.0	0.0	0.0	146.0	0.0	29.0	0.0	43.0	0.0	0.0	0.0	0.0	0.0	0.0	43.0	0.0	0.0	0.0	0.0	0.0	0.0	0.0	0.0	0.0	0.0	0.0	94.0	0.0	0.0	7.0	0.0	0.0	0.0	0.0	0.0	0.0	47.0	0.0	23.0	0.0	0.0	0.0	0.0	0.0	0.0	0.0
5314513572d64cf1246d867a61324900	k__Bacteria; p__Firmicutes; c__Clostridia; o__Clostridiales; f__[Mogibacteriaceae]; g__; s__	0.0	0.0	0.0	0.0	48.0	0.0	0.0	0.0	0.0	0.0	0.0	0.0	0.0	0.0	0.0	0.0	0.0	0.0	0.0	0.0	0.0	0.0	0.0	0.0	0.0	0.0	0.0	0.0	0.0	0.0	0.0	0.0	0.0	0.0	0.0	0.0	0.0	0.0	0.0	0.0	0.0	0.0	0.0	0.0	0.0	0.0	0.0	0.0
f876e1261ed7a1ff50ee0c20f6b54cbf	k__Bacteria; p__Firmicutes; c__Clostridia; o__Clostridiales; f__Lachnospiraceae; g__; s__	0.0	26.0	0.0	0.0	49.0	22.0	0.0	0.0	0.0	41.0	0.0	0.0	0.0	0.0	0.0	0.0	0.0	0.0	0.0	0.0	0.0	0.0	0.0	0.0	0.0	0.0	50.0	0.0	0.0	0.0	49.0	0.0	0.0	0.0	31.0	0.0	0.0	0.0	0.0	0.0	0.0	27.0	0.0	0.0	0.0	0.0	0.0	30.0
da29f8add51c31d6d1e7c7dfc1c76016	k__Bacteria; p__Firmicutes; c__Clostridia; o__Clostridiales; f__Lachnospiraceae	0.0	0.0	0.0	0.0	0.0	0.0	0.0	0.0	0.0	0.0	0.0	0.0	0.0	0.0	0.0	0.0	0.0	17.0	0.0	0.0	0.0	0.0	39.0	60.0	0.0	0.0	0.0	0.0	0.0	0.0	0.0	0.0	0.0	0.0	0.0	0.0	0.0	0.0	0.0	0.0	0.0	16.0	0.0	0.0	32.0	38.0	0.0	30.0
f2490cbcfc4040a9caf3ad3541278702	k__Bacteria; p__Firmicutes; c__Clostridia; o__Clostridiales; f__Lachnospiraceae; g__Roseburia	31.0	105.0	0.0	102.0	36.0	111.0	20.0	198.0	0.0	696.0	0.0	228.0	48.0	47.0	133.0	0.0	45.0	18.0	190.0	0.0	204.0	43.0	0.0	335.0	1478.0	105.0	54.0	63.0	0.0	23.0	0.0	22.0	48.0	0.0	423.0	73.0	72.0	0.0	57.0	0.0	0.0	0.0	115.0	134.0	122.0	81.0	88.0	0.0
bbe82e283cfabb4c5cdfa02935963bcd	k__Bacteria; p__Firmicutes; c__Bacilli; o__Turicibacterales; f__Turicibacteraceae; g__Turicibacter; s__	0.0	0.0	31.0	41.0	26.0	0.0	0.0	32.0	0.0	0.0	0.0	0.0	0.0	46.0	0.0	0.0	16.0	0.0	0.0	0.0	0.0	0.0	0.0	44.0	0.0	66.0	0.0	34.0	40.0	0.0	27.0	0.0	0.0	72.0	554.0	0.0	47.0	37.0	0.0	0.0	33.0	0.0	0.0	39.0	0.0	0.0	0.0	63.0
8c2d371dd1fcb3fbf84f6591aff9618d	k__Bacteria; p__Bacteroidetes; c__Bacteroidia; o__Bacteroidales; f__Bacteroidaceae; g__Bacteroides; s__	122.0	474.0	3.0	0.0	34.0	1163.0	44.0	0.0	519.0	18.0	0.0	316.0	34.0	35.0	27.0	18.0	104.0	18.0	114.0	62.0	860.0	249.0	337.0	1030.0	0.0	744.0	519.0	398.0	57.0	49.0	1171.0	135.0	116.0	220.0	1652.0	253.0	223.0	547.0	218.0	647.0	236.0	283.0	369.0	255.0	770.0	45.0	133.0	430.0
1e17dd2999ff19643579e195594071f1	k__Bacteria; p__Firmicutes; c__Erysipelotrichi; o__Erysipelotrichales; f__Erysipelotrichaceae; g__Holdemania; s__	0.0	0.0	0.0	0.0	0.0	0.0	34.0	0.0	0.0	0.0	0.0	0.0	0.0	0.0	34.0	0.0	0.0	0.0	0.0	0.0	0.0	0.0	0.0	0.0	61.0	0.0	0.0	0.0	0.0	0.0	27.0	0.0	0.0	0.0	0.0	0.0	0.0	0.0	0.0	0.0	0.0	36.0	0.0	0.0	0.0	0.0	0.0	0.0
52ea759062f8849c1180df048f52eb99	k__Bacteria; p__Bacteroidetes; c__Bacteroidia; o__Bacteroidales; f__[Odoribacteraceae]; g__Butyricimonas; s__	0.0	0.0	0.0	0.0	0.0	46.0	0.0	0.0	0.0	0.0	0.0	13.0	0.0	0.0	0.0	0.0	0.0	0.0	0.0	0.0	0.0	0.0	0.0	0.0	0.0	0.0	0.0	0.0	0.0	0.0	0.0	0.0	0.0	32.0	0.0	35.0	10.0	22.0	0.0	0.0	0.0	0.0	0.0	11.0	0.0	0.0	0.0	11.0
71db0338d071847b46b129394c7fbc6b	k__Bacteria; p__Firmicutes; c__Clostridia; o__Clostridiales; f__Ruminococcaceae	0.0	0.0	0.0	0.0	0.0	0.0	0.0	0.0	0.0	0.0	0.0	0.0	0.0	0.0	0.0	0.0	0.0	0.0	0.0	0.0	0.0	0.0	0.0	0.0	15.0	0.0	0.0	0.0	0.0	0.0	0.0	0.0	11.0	0.0	0.0	0.0	11.0	24.0	0.0	0.0	0.0	0.0	0.0	0.0	0.0	0.0	0.0	0.0
4784e3e413d91ff3fc888d861a50da05	k__Bacteria; p__Firmicutes; c__Clostridia; o__Clostridiales; f__Clostridiaceae; g__Clostridium; s__	0.0	0.0	0.0	66.0	0.0	26.0	36.0	7.0	23.0	0.0	0.0	68.0	47.0	0.0	37.0	31.0	44.0	69.0	65.0	48.0	57.0	0.0	63.0	57.0	0.0	67.0	51.0	37.0	53.0	68.0	57.0	0.0	0.0	109.0	74.0	58.0	57.0	0.0	48.0	79.0	35.0	24.0	37.0	0.0	235.0	0.0	0.0	94.0
9ead7e2f6af78e8fab7d95afda92c61f	k__Bacteria; p__Bacteroidetes; c__Bacteroidia; o__Bacteroidales; f__[Odoribacteraceae]; g__Butyricimonas; s__	24.0	0.0	0.0	0.0	29.0	0.0	0.0	0.0	0.0	0.0	0.0	0.0	0.0	0.0	0.0	0.0	0.0	0.0	0.0	0.0	0.0	0.0	0.0	0.0	0.0	0.0	0.0	0.0	0.0	0.0	8.0	0.0	0.0	0.0	0.0	0.0	0.0	0.0	20.0	0.0	0.0	0.0	0.0	0.0	0.0	0.0	0.0	0.0
9ed41755b5732c51632d79860f619e60	k__Bacteria; p__Firmicutes; c__Clostridia; o__Clostridiales; f__Peptostreptococcaceae	0.0	0.0	9.0	0.0	20.0	0.0	0.0	0.0	0.0	0.0	0.0	0.0	0.0	0.0	0.0	0.0	0.0	0.0	0.0	0.0	0.0	0.0	0.0	0.0	0.0	0.0	0.0	0.0	0.0	0.0	0.0	0.0	0.0	0.0	0.0	0.0	0.0	0.0	0.0	0.0	11.0	0.0	0.0	0.0	0.0	0.0	15.0	0.0
d88361dcdc77c1fc89f858f1f0bd5b3e	k__Bacteria; p__Firmicutes; c__Clostridia; o__Clostridiales; f__Ruminococcaceae; g__; s__	0.0	0.0	0.0	0.0	0.0	31.0	0.0	0.0	0.0	0.0	28.0	0.0	29.0	0.0	0.0	0.0	0.0	0.0	0.0	0.0	0.0	0.0	0.0	0.0	0.0	0.0	0.0	0.0	34.0	0.0	0.0	0.0	0.0	0.0	16.0	0.0	0.0	0.0	0.0	0.0	0.0	0.0	0.0	0.0	0.0	0.0	0.0	0.0
b6974ed013dde18715fe093c8606f972	k__Bacteria; p__Firmicutes; c__Clostridia; o__Clostridiales; f__Lachnospiraceae; g__; s__	0.0	0.0	0.0	0.0	11.0	0.0	43.0	0.0	0.0	0.0	0.0	0.0	0.0	0.0	0.0	106.0	0.0	0.0	0.0	0.0	7.0	0.0	52.0	0.0	52.0	73.0	0.0	0.0	0.0	37.0	0.0	0.0	0.0	0.0	46.0	0.0	0.0	0.0	0.0	58.0	0.0	0.0	0.0	0.0	0.0	0.0	0.0	42.0
7fb3f4278fdb3abb775cfa21bcdb86de	k__Bacteria; p__Firmicutes; c__Clostridia; o__Clostridiales; f__Ruminococcaceae; g__Faecalibacterium; s__prausnitzii	32.0	49.0	0.0	0.0	0.0	53.0	23.0	75.0	112.0	91.0	0.0	56.0	34.0	63.0	31.0	28.0	49.0	100.0	25.0	56.0	0.0	37.0	114.0	19.0	0.0	105.0	29.0	158.0	89.0	56.0	125.0	36.0	47.0	17.0	302.0	102.0	149.0	29.0	50.0	114.0	0.0	58.0	9.0	209.0	99.0	0.0	33.0	179.0
4ea3e7b6d0065fbb1fa8d3632699f585	k__Bacteria; p__Firmicutes; c__Bacilli; o__Turicibacterales; f__Turicibacteraceae; g__Turicibacter; s__	0.0	0.0	11.0	0.0	15.0	0.0	0.0	9.0	0.0	0.0	0.0	0.0	0.0	0.0	0.0	0.0	0.0	0.0	0.0	0.0	0.0	0.0	0.0	0.0	0.0	0.0	0.0	34.0	0.0	0.0	0.0	0.0	0.0	0.0	221.0	0.0	19.0	0.0	0.0	0.0	18.0	0.0	0.0	0.0	0.0	0.0	0.0	13.0
d46be7f66c6d96e6a3cc544c0ad19639	k__Bacteria; p__Firmicutes; c__Clostridia; o__Clostridiales; f__Lachnospiraceae; g__Coprococcus; s__	0.0	0.0	0.0	0.0	0.0	0.0	0.0	0.0	0.0	42.0	0.0	0.0	0.0	0.0	0.0	0.0	0.0	0.0	0.0	0.0	0.0	0.0	0.0	0.0	0.0	0.0	0.0	0.0	0.0	38.0	34.0	31.0	0.0	0.0	0.0	0.0	0.0	13.0	0.0	0.0	0.0	0.0	0.0	0.0	0.0	0.0	14.0	13.0
426287c532987adfae716d4605557b88	k__Bacteria; p__Firmicutes; c__Clostridia; o__Clostridiales; f__Ruminococcaceae; g__Ruminococcus; s__	0.0	0.0	0.0	0.0	0.0	0.0	12.0	0.0	0.0	0.0	0.0	0.0	0.0	0.0	0.0	0.0	0.0	0.0	0.0	0.0	0.0	0.0	0.0	0.0	0.0	0.0	0.0	0.0	0.0	0.0	0.0	0.0	0.0	0.0	24.0	0.0	0.0	0.0	0.0	0.0	0.0	0.0	0.0	0.0	0.0	0.0	0.0	33.0
b824fe1a708c2b79e329643096456cfe	k__Bacteria; p__Firmicutes; c__Clostridia; o__Clostridiales; f__Lachnospiraceae; g__Dorea; s__formicigenerans	0.0	0.0	0.0	0.0	0.0	0.0	0.0	0.0	0.0	0.0	0.0	54.0	0.0	0.0	0.0	0.0	0.0	0.0	0.0	0.0	0.0	0.0	0.0	0.0	0.0	0.0	0.0	0.0	0.0	0.0	0.0	0.0	0.0	0.0	25.0	0.0	0.0	0.0	0.0	0.0	0.0	0.0	0.0	0.0	0.0	0.0	0.0	11.0
9634d42b23cfafd8f50476f666a015b0	k__Bacteria; p__Bacteroidetes; c__Bacteroidia; o__Bacteroidales; f__Bacteroidaceae; g__Bacteroides; s__ovatus	0.0	0.0	0.0	0.0	0.0	0.0	0.0	0.0	0.0	0.0	0.0	4.0	0.0	0.0	0.0	15.0	0.0	0.0	0.0	0.0	0.0	2.0	0.0	0.0	0.0	0.0	0.0	0.0	0.0	0.0	0.0	0.0	0.0	0.0	0.0	0.0	0.0	0.0	0.0	0.0	0.0	0.0	0.0	0.0	19.0	0.0	0.0	0.0
312dd48c4a3f3896c57248033c82963b	k__Bacteria; p__Actinobacteria; c__Coriobacteriia; o__Coriobacteriales; f__Coriobacteriaceae; g__Eggerthella; s__lenta	0.0	0.0	14.0	0.0	15.0	0.0	0.0	0.0	0.0	0.0	0.0	0.0	0.0	0.0	0.0	0.0	0.0	0.0	0.0	0.0	0.0	0.0	0.0	0.0	0.0	0.0	0.0	0.0	0.0	0.0	0.0	0.0	0.0	0.0	0.0	0.0	0.0	46.0	0.0	0.0	0.0	0.0	0.0	0.0	0.0	0.0	0.0	0.0
29a34328b052974a5b1885d2554a579a	k__Bacteria; p__Proteobacteria; c__Alphaproteobacteria; o__RF32; f__; g__; s__	0.0	125.0	0.0	0.0	0.0	0.0	0.0	0.0	0.0	0.0	0.0	57.0	0.0	0.0	0.0	73.0	0.0	0.0	0.0	0.0	0.0	793.0	0.0	0.0	30.0	38.0	0.0	0.0	0.0	0.0	0.0	0.0	0.0	0.0	81.0	194.0	0.0	0.0	108.0	0.0	0.0	0.0	0.0	0.0	0.0	0.0	0.0	0.0
ed4731cb77b3aa2d990191d9781816e2	k__Bacteria; p__Bacteroidetes; c__Bacteroidia; o__Bacteroidales; f__Bacteroidaceae; g__Bacteroides; s__	0.0	27.0	0.0	0.0	0.0	167.0	0.0	0.0	67.0	40.0	0.0	0.0	0.0	0.0	36.0	0.0	0.0	0.0	157.0	0.0	0.0	0.0	0.0	0.0	0.0	0.0	0.0	0.0	0.0	0.0	0.0	0.0	0.0	0.0	0.0	0.0	0.0	0.0	0.0	0.0	0.0	0.0	0.0	0.0	0.0	0.0	0.0	0.0
df2aebc644c671eb1cd374b447f84638	k__Bacteria; p__Firmicutes; c__Clostridia; o__Clostridiales; f__Ruminococcaceae	0.0	0.0	0.0	0.0	0.0	0.0	29.0	0.0	0.0	0.0	0.0	0.0	0.0	0.0	0.0	0.0	16.0	0.0	0.0	0.0	0.0	0.0	0.0	0.0	0.0	0.0	0.0	0.0	0.0	0.0	0.0	0.0	0.0	0.0	0.0	0.0	0.0	30.0	0.0	0.0	0.0	0.0	0.0	0.0	0.0	0.0	0.0	0.0
f80ab3ee5467049e69bc36411efed55a	k__Bacteria; p__Firmicutes; c__Clostridia; o__Clostridiales; f__Lachnospiraceae; g__Blautia; s__	0.0	0.0	0.0	0.0	0.0	34.0	0.0	0.0	0.0	0.0	0.0	0.0	0.0	0.0	0.0	0.0	0.0	0.0	0.0	57.0	0.0	0.0	0.0	0.0	0.0	0.0	0.0	0.0	0.0	0.0	0.0	0.0	0.0	0.0	0.0	20.0	25.0	0.0	0.0	0.0	0.0	0.0	0.0	41.0	36.0	0.0	0.0	14.0
2cdcdd990e23eb9d8bc75b164ee064ec	k__Bacteria; p__Firmicutes; c__Clostridia; o__Clostridiales; f__Lachnospiraceae; g__; s__	0.0	0.0	0.0	0.0	0.0	0.0	0.0	0.0	0.0	0.0	0.0	69.0	0.0	0.0	29.0	53.0	0.0	55.0	0.0	58.0	52.0	48.0	82.0	67.0	0.0	86.0	29.0	58.0	0.0	64.0	0.0	0.0	0.0	0.0	25.0	25.0	0.0	0.0	0.0	0.0	60.0	0.0	0.0	0.0	0.0	48.0	0.0	62.0
39b53a2e1b0321182d1994e4b23f9f5d	k__Bacteria; p__Firmicutes; c__Clostridia; o__Clostridiales; f__Ruminococcaceae; g__Oscillospira; s__	0.0	26.0	0.0	0.0	0.0	21.0	33.0	44.0	0.0	36.0	23.0	0.0	0.0	0.0	0.0	0.0	0.0	0.0	0.0	0.0	0.0	0.0	0.0	0.0	0.0	0.0	0.0	0.0	0.0	0.0	0.0	0.0	0.0	0.0	18.0	18.0	0.0	0.0	0.0	0.0	0.0	0.0	18.0	0.0	0.0	0.0	0.0	15.0
696081e32b570521cf6ae99f6348a874	k__Bacteria; p__Firmicutes; c__Clostridia; o__Clostridiales; f__Ruminococcaceae; g__Oscillospira; s__	0.0	32.0	0.0	0.0	0.0	37.0	0.0	0.0	0.0	53.0	27.0	69.0	156.0	0.0	0.0	0.0	26.0	23.0	0.0	54.0	0.0	0.0	47.0	0.0	0.0	0.0	26.0	0.0	20.0	48.0	0.0	87.0	64.0	52.0	73.0	101.0	213.0	222.0	30.0	0.0	0.0	31.0	51.0	0.0	0.0	0.0	47.0	0.0
daa345eca44f4727268954fe145eeefb	k__Bacteria; p__Bacteroidetes; c__Bacteroidia; o__Bacteroidales; f__Porphyromonadaceae; g__Parabacteroides; s__	0.0	0.0	0.0	0.0	2.0	0.0	0.0	0.0	0.0	0.0	0.0	0.0	0.0	3.0	0.0	0.0	0.0	0.0	0.0	0.0	3.0	0.0	0.0	0.0	0.0	0.0	0.0	0.0	0.0	0.0	0.0	0.0	0.0	0.0	0.0	0.0	4.0	0.0	0.0	0.0	0.0	3.0	0.0	0.0	0.0	0.0	0.0	0.0
cbb9bf20a6e9ad55cb333a2b5f106505	k__Bacteria; p__Bacteroidetes; c__Bacteroidia; o__Bacteroidales; f__[Odoribacteraceae]; g__Butyricimonas; s__	0.0	0.0	0.0	0.0	0.0	0.0	0.0	9.0	0.0	0.0	0.0	19.0	0.0	0.0	0.0	0.0	0.0	0.0	0.0	0.0	0.0	0.0	44.0	0.0	0.0	0.0	0.0	0.0	0.0	0.0	0.0	0.0	0.0	0.0	0.0	0.0	13.0	47.0	0.0	0.0	0.0	0.0	0.0	0.0	0.0	0.0	0.0	0.0
16cc7b4dfe7f445beed8127172a69d8d	k__Bacteria; p__Firmicutes; c__Clostridia; o__Clostridiales; f__Lachnospiraceae	0.0	0.0	0.0	0.0	0.0	0.0	0.0	0.0	0.0	0.0	0.0	0.0	0.0	0.0	0.0	0.0	0.0	0.0	0.0	0.0	24.0	0.0	0.0	0.0	0.0	0.0	0.0	0.0	0.0	0.0	0.0	0.0	0.0	0.0	0.0	31.0	0.0	0.0	0.0	0.0	0.0	0.0	21.0	0.0	36.0	0.0	0.0	0.0
0d1951e401c459352d0f06b7440a4f1e	k__Bacteria; p__Firmicutes; c__Clostridia; o__Clostridiales; f__Ruminococcaceae; g__Oscillospira; s__	0.0	0.0	0.0	0.0	14.0	0.0	35.0	0.0	0.0	0.0	0.0	0.0	0.0	0.0	0.0	0.0	0.0	0.0	0.0	0.0	0.0	0.0	0.0	0.0	0.0	0.0	0.0	0.0	0.0	0.0	0.0	0.0	0.0	0.0	0.0	0.0	0.0	0.0	0.0	0.0	0.0	0.0	0.0	0.0	0.0	0.0	0.0	0.0
59cf1b70487bc07963db42a9270bbe55	k__Bacteria; p__Firmicutes; c__Clostridia; o__Clostridiales	0.0	0.0	0.0	0.0	0.0	0.0	0.0	18.0	0.0	0.0	0.0	0.0	0.0	0.0	0.0	0.0	0.0	0.0	0.0	0.0	0.0	0.0	0.0	0.0	0.0	0.0	0.0	0.0	0.0	0.0	0.0	0.0	0.0	0.0	0.0	0.0	0.0	21.0	0.0	0.0	0.0	0.0	0.0	0.0	0.0	19.0	0.0	0.0
e683992a8529d4817cdabe760395265a	k__Bacteria; p__Firmicutes; c__Clostridia; o__Clostridiales; f__Lachnospiraceae; g__Blautia; s__	17.0	41.0	348.0	42.0	0.0	26.0	45.0	120.0	72.0	93.0	0.0	63.0	24.0	49.0	19.0	94.0	36.0	78.0	57.0	28.0	65.0	38.0	66.0	61.0	36.0	59.0	33.0	54.0	35.0	37.0	71.0	0.0	0.0	56.0	132.0	27.0	0.0	39.0	29.0	0.0	91.0	66.0	69.0	0.0	29.0	67.0	46.0	45.0
bbbd4b73996e0229fbbaed3434437588	k__Bacteria; p__Bacteroidetes; c__Bacteroidia; o__Bacteroidales; f__Rikenellaceae	0.0	0.0	0.0	0.0	0.0	0.0	0.0	0.0	0.0	0.0	0.0	0.0	0.0	0.0	0.0	0.0	6.0	0.0	0.0	0.0	0.0	44.0	0.0	0.0	19.0	20.0	0.0	0.0	0.0	0.0	0.0	0.0	0.0	0.0	0.0	0.0	26.0	0.0	0.0	0.0	0.0	27.0	12.0	0.0	0.0	27.0	0.0	16.0
fa4b3bdcf6635ba47793046492011140	k__Bacteria; p__Firmicutes; c__Clostridia; o__Clostridiales; f__Dehalobacteriaceae; g__Dehalobacterium; s__	0.0	0.0	0.0	0.0	0.0	0.0	0.0	0.0	0.0	0.0	31.0	0.0	0.0	0.0	0.0	0.0	0.0	0.0	0.0	0.0	0.0	0.0	0.0	0.0	0.0	0.0	0.0	0.0	0.0	28.0	0.0	0.0	27.0	0.0	24.0	0.0	0.0	54.0	0.0	0.0	0.0	0.0	0.0	0.0	0.0	0.0	0.0	13.0
208515bb6bd0f4cb98bb432c264a8e7e	k__Bacteria; p__Firmicutes; c__Clostridia; o__Clostridiales; f__Lachnospiraceae; g__Coprococcus; s__	0.0	0.0	0.0	13.0	14.0	0.0	12.0	0.0	0.0	0.0	0.0	29.0	82.0	0.0	67.0	20.0	14.0	0.0	0.0	0.0	0.0	0.0	0.0	28.0	0.0	14.0	0.0	113.0	0.0	0.0	0.0	0.0	0.0	0.0	0.0	0.0	0.0	0.0	0.0	0.0	0.0	0.0	0.0	10.0	9.0	0.0	0.0	0.0
1a70f7a6b83bde120534eafa23a471dd	k__Bacteria; p__Bacteroidetes; c__Bacteroidia; o__Bacteroidales; f__Bacteroidaceae; g__Bacteroides; s__ovatus	0.0	0.0	0.0	19.0	36.0	17.0	0.0	0.0	28.0	34.0	0.0	33.0	0.0	0.0	19.0	0.0	0.0	0.0	0.0	15.0	0.0	45.0	0.0	0.0	55.0	49.0	10.0	0.0	0.0	30.0	15.0	40.0	0.0	32.0	172.0	0.0	62.0	0.0	0.0	0.0	28.0	38.0	24.0	0.0	0.0	57.0	19.0	0.0
e28c870cada79abf36aed7ce5dfbd2bb	k__Bacteria; p__Firmicutes; c__Clostridia; o__Clostridiales	0.0	0.0	0.0	0.0	31.0	0.0	0.0	0.0	0.0	0.0	0.0	0.0	0.0	0.0	0.0	0.0	0.0	0.0	0.0	0.0	0.0	0.0	56.0	0.0	0.0	0.0	0.0	0.0	0.0	0.0	0.0	0.0	0.0	0.0	0.0	0.0	0.0	0.0	0.0	0.0	0.0	0.0	0.0	0.0	0.0	0.0	0.0	0.0
0f82c89f423eed520c156b34afbb9a6d	k__Bacteria; p__Firmicutes; c__Bacilli; o__Lactobacillales; f__Streptococcaceae; g__Streptococcus; s__	0.0	16.0	28.0	0.0	0.0	0.0	0.0	0.0	10.0	0.0	0.0	0.0	0.0	0.0	0.0	0.0	0.0	0.0	0.0	0.0	0.0	0.0	0.0	0.0	0.0	0.0	0.0	0.0	0.0	0.0	0.0	0.0	0.0	0.0	0.0	0.0	0.0	0.0	0.0	0.0	41.0	0.0	0.0	0.0	0.0	0.0	0.0	24.0
7858c8d1324d00cc328f48704de9cda3	k__Bacteria; p__Firmicutes; c__Clostridia; o__Clostridiales; f__Veillonellaceae; g__Veillonella; s__dispar	0.0	0.0	0.0	38.0	0.0	0.0	36.0	0.0	0.0	0.0	0.0	0.0	0.0	0.0	21.0	0.0	0.0	0.0	0.0	0.0	0.0	0.0	0.0	0.0	0.0	0.0	0.0	0.0	0.0	0.0	0.0	48.0	0.0	0.0	0.0	0.0	0.0	0.0	0.0	0.0	0.0	0.0	41.0	0.0	73.0	0.0	0.0	18.0
5c4c5e0e26f47d5616a9c4fd19689423	k__Bacteria; p__Firmicutes; c__Clostridia; o__Clostridiales; f__Ruminococcaceae	0.0	0.0	36.0	0.0	0.0	0.0	33.0	17.0	0.0	0.0	0.0	0.0	0.0	0.0	0.0	0.0	0.0	0.0	0.0	0.0	35.0	0.0	25.0	0.0	0.0	0.0	0.0	0.0	0.0	0.0	0.0	0.0	0.0	0.0	0.0	0.0	0.0	0.0	0.0	0.0	0.0	0.0	0.0	0.0	0.0	0.0	0.0	0.0
734da3d8b5f0cff16101c8e3eccbc333	k__Bacteria; p__Firmicutes; c__Clostridia; o__Clostridiales; f__Clostridiaceae; g__SMB53; s__	0.0	43.0	0.0	0.0	0.0	17.0	0.0	25.0	0.0	0.0	0.0	0.0	0.0	74.0	0.0	0.0	0.0	55.0	0.0	0.0	0.0	0.0	0.0	0.0	0.0	42.0	0.0	40.0	52.0	0.0	0.0	0.0	34.0	30.0	408.0	0.0	50.0	69.0	0.0	0.0	43.0	0.0	0.0	0.0	0.0	0.0	24.0	82.0
994971e197be3545360b6549c8ee780d	k__Bacteria; p__Firmicutes; c__Clostridia; o__Clostridiales; f__Clostridiaceae; g__; s__	0.0	0.0	0.0	0.0	0.0	0.0	0.0	0.0	0.0	0.0	0.0	0.0	0.0	0.0	0.0	0.0	0.0	38.0	0.0	0.0	0.0	0.0	0.0	0.0	0.0	0.0	0.0	29.0	0.0	0.0	0.0	0.0	0.0	0.0	41.0	0.0	0.0	0.0	0.0	0.0	61.0	0.0	0.0	0.0	0.0	0.0	0.0	34.0
c58cbf998255e7db274f9fe8886b2923	k__Bacteria; p__Firmicutes; c__Clostridia; o__Clostridiales; f__[Mogibacteriaceae]; g__; s__	0.0	0.0	0.0	0.0	0.0	0.0	0.0	0.0	0.0	0.0	0.0	0.0	0.0	0.0	0.0	0.0	0.0	0.0	0.0	0.0	0.0	0.0	0.0	0.0	0.0	0.0	0.0	0.0	0.0	0.0	0.0	0.0	0.0	0.0	21.0	0.0	0.0	10.0	26.0	0.0	0.0	0.0	8.0	0.0	0.0	29.0	29.0	0.0
b24a79afcd25a29005550a5c6566469f	k__Bacteria; p__Firmicutes; c__Clostridia; o__Clostridiales; f__Ruminococcaceae; g__Gemmiger; s__formicilis	0.0	0.0	0.0	0.0	0.0	38.0	0.0	0.0	0.0	0.0	0.0	46.0	0.0	0.0	0.0	0.0	0.0	0.0	24.0	53.0	0.0	0.0	0.0	0.0	0.0	30.0	0.0	0.0	0.0	0.0	0.0	0.0	0.0	0.0	62.0	22.0	0.0	0.0	0.0	0.0	0.0	0.0	0.0	0.0	0.0	0.0	0.0	0.0
406ca8c3ec10a3db641992b4c74991a5	k__Bacteria; p__Firmicutes; c__Clostridia; o__Clostridiales; f__Ruminococcaceae; g__Ruminococcus; s__	0.0	32.0	0.0	0.0	0.0	0.0	42.0	0.0	0.0	0.0	57.0	49.0	0.0	0.0	0.0	53.0	0.0	0.0	0.0	0.0	0.0	0.0	0.0	0.0	0.0	33.0	0.0	0.0	0.0	0.0	0.0	0.0	0.0	0.0	0.0	0.0	0.0	0.0	0.0	0.0	0.0	0.0	0.0	0.0	0.0	0.0	0.0	0.0
3c6251d5fb1d9876d5518d4f33464123	k__Bacteria; p__Firmicutes; c__Clostridia; o__Clostridiales; f__Ruminococcaceae; g__Oscillospira; s__	0.0	0.0	0.0	0.0	12.0	20.0	21.0	32.0	42.0	29.0	0.0	0.0	0.0	35.0	0.0	74.0	0.0	0.0	35.0	0.0	0.0	0.0	65.0	0.0	0.0	48.0	0.0	0.0	0.0	0.0	48.0	0.0	0.0	0.0	47.0	0.0	0.0	37.0	0.0	0.0	0.0	47.0	0.0	0.0	0.0	0.0	0.0	0.0
71d63b6704729d7882a9a3b1ea470964	k__Bacteria; p__Firmicutes; c__Clostridia; o__Clostridiales; f__Ruminococcaceae; g__Faecalibacterium; s__prausnitzii	0.0	0.0	0.0	0.0	0.0	13.0	0.0	0.0	0.0	0.0	0.0	0.0	0.0	39.0	0.0	22.0	0.0	0.0	0.0	0.0	0.0	0.0	0.0	0.0	0.0	0.0	0.0	0.0	0.0	0.0	26.0	0.0	0.0	0.0	0.0	0.0	0.0	0.0	0.0	0.0	0.0	0.0	0.0	0.0	0.0	0.0	6.0	0.0
5970b683e2361ae0954058f858352075	k__Bacteria; p__Firmicutes; c__Clostridia; o__Clostridiales; f__Lachnospiraceae; g__Anaerostipes; s__	0.0	0.0	0.0	0.0	0.0	0.0	0.0	0.0	0.0	0.0	0.0	0.0	0.0	0.0	0.0	0.0	29.0	0.0	0.0	0.0	0.0	22.0	25.0	0.0	26.0	0.0	60.0	0.0	0.0	0.0	32.0	0.0	0.0	0.0	0.0	0.0	0.0	0.0	0.0	0.0	0.0	0.0	0.0	0.0	0.0	0.0	0.0	0.0
1b9b094d32163aff134793591b3b42d0	k__Bacteria; p__Firmicutes; c__Clostridia; o__Clostridiales; f__Lachnospiraceae	0.0	0.0	0.0	0.0	664.0	0.0	0.0	0.0	0.0	0.0	0.0	0.0	0.0	0.0	0.0	46.0	54.0	0.0	0.0	0.0	0.0	0.0	0.0	0.0	0.0	0.0	0.0	0.0	0.0	0.0	44.0	0.0	0.0	0.0	0.0	0.0	0.0	25.0	0.0	0.0	0.0	78.0	0.0	0.0	0.0	0.0	0.0	43.0
6bb439b2df213310ba00d12e5ac98112	k__Bacteria; p__Firmicutes; c__Clostridia; o__Clostridiales; f__Veillonellaceae; g__Dialister; s__	0.0	0.0	0.0	0.0	0.0	0.0	11.0	0.0	0.0	0.0	0.0	0.0	0.0	0.0	0.0	0.0	0.0	0.0	34.0	0.0	0.0	30.0	0.0	0.0	0.0	6.0	31.0	0.0	0.0	0.0	0.0	0.0	0.0	0.0	0.0	0.0	0.0	0.0	0.0	0.0	0.0	0.0	0.0	0.0	0.0	0.0	0.0	13.0
b4fe2ba7aeeb77696b0550f82c90629c	k__Bacteria; p__Bacteroidetes; c__Bacteroidia; o__Bacteroidales; f__Bacteroidaceae; g__Bacteroides; s__	13.0	45.0	0.0	0.0	0.0	54.0	0.0	0.0	23.0	40.0	0.0	0.0	0.0	0.0	0.0	102.0	37.0	0.0	38.0	0.0	66.0	20.0	0.0	0.0	0.0	0.0	0.0	0.0	160.0	0.0	843.0	56.0	19.0	0.0	0.0	0.0	247.0	0.0	0.0	0.0	0.0	0.0	221.0	0.0	33.0	83.0	0.0	1038.0
b876521a0d21f0ae2152ba966c1cb21a	k__Bacteria; p__Firmicutes; c__Clostridia; o__Clostridiales; f__Lachnospiraceae; g__Roseburia	34.0	0.0	0.0	20.0	0.0	0.0	28.0	0.0	0.0	0.0	0.0	0.0	0.0	40.0	127.0	44.0	50.0	263.0	42.0	33.0	84.0	40.0	0.0	273.0	0.0	285.0	0.0	67.0	80.0	19.0	0.0	0.0	0.0	62.0	276.0	17.0	438.0	47.0	99.0	257.0	110.0	33.0	105.0	39.0	128.0	0.0	101.0	160.0
9a0e4315067edcfd84ec191ef3eb51eb	k__Bacteria; p__Firmicutes; c__Clostridia; o__Clostridiales; f__Ruminococcaceae; g__Oscillospira; s__	0.0	0.0	0.0	0.0	0.0	0.0	0.0	0.0	0.0	0.0	0.0	0.0	0.0	0.0	0.0	0.0	0.0	0.0	0.0	0.0	0.0	0.0	0.0	0.0	0.0	0.0	0.0	0.0	0.0	44.0	0.0	0.0	0.0	0.0	0.0	0.0	0.0	0.0	0.0	0.0	0.0	0.0	0.0	0.0	0.0	0.0	0.0	49.0
578603358c911ccaa24278590a373eb0	k__Bacteria; p__Firmicutes; c__Clostridia; o__Clostridiales; f__Lachnospiraceae; g__Lachnospira; s__	0.0	33.0	0.0	0.0	0.0	25.0	39.0	0.0	0.0	0.0	0.0	0.0	0.0	25.0	305.0	0.0	34.0	48.0	0.0	37.0	128.0	0.0	67.0	0.0	0.0	45.0	28.0	0.0	0.0	0.0	53.0	0.0	0.0	63.0	30.0	64.0	0.0	0.0	48.0	0.0	53.0	0.0	0.0	0.0	76.0	0.0	22.0	0.0
3f52808b5b7f9b0ee597b61490cce1e1	k__Bacteria; p__Firmicutes; c__Clostridia; o__Clostridiales; f__Lachnospiraceae; g__Blautia; s__	0.0	0.0	0.0	0.0	0.0	22.0	0.0	0.0	0.0	0.0	0.0	48.0	0.0	0.0	0.0	0.0	0.0	0.0	0.0	0.0	0.0	0.0	0.0	0.0	0.0	64.0	0.0	0.0	34.0	0.0	44.0	0.0	0.0	0.0	56.0	36.0	30.0	0.0	0.0	0.0	0.0	0.0	0.0	0.0	33.0	0.0	0.0	34.0
201693f4244e365ee3a4a1d41c09a302	k__Bacteria; p__Firmicutes; c__Clostridia; o__Clostridiales; f__Ruminococcaceae; g__Oscillospira; s__	48.0	18.0	0.0	0.0	0.0	31.0	0.0	0.0	0.0	48.0	0.0	22.0	15.0	9.0	22.0	31.0	0.0	0.0	0.0	0.0	0.0	0.0	0.0	0.0	0.0	0.0	14.0	0.0	28.0	0.0	0.0	61.0	0.0	83.0	158.0	133.0	54.0	0.0	0.0	0.0	0.0	0.0	48.0	76.0	59.0	0.0	20.0	10.0
9a6e3b9a4e7ecea0b0875e32e94acc9e	k__Bacteria; p__Proteobacteria; c__Alphaproteobacteria; o__RF32; f__; g__; s__	34.0	0.0	0.0	0.0	0.0	0.0	13.0	0.0	0.0	0.0	0.0	0.0	0.0	0.0	0.0	0.0	0.0	0.0	0.0	0.0	0.0	0.0	142.0	0.0	0.0	0.0	0.0	0.0	0.0	0.0	0.0	0.0	0.0	0.0	0.0	0.0	0.0	0.0	0.0	0.0	0.0	37.0	0.0	0.0	0.0	0.0	0.0	0.0
d9f25317ca1008057e9567a975e3e6d4	k__Bacteria; p__Firmicutes; c__Clostridia; o__Clostridiales; f__Ruminococcaceae; g__Oscillospira; s__	0.0	0.0	0.0	0.0	0.0	0.0	0.0	0.0	0.0	0.0	0.0	0.0	0.0	0.0	24.0	0.0	0.0	0.0	0.0	0.0	0.0	0.0	50.0	27.0	0.0	0.0	0.0	0.0	0.0	0.0	37.0	0.0	0.0	0.0	0.0	0.0	0.0	0.0	0.0	0.0	0.0	0.0	0.0	0.0	0.0	0.0	0.0	0.0
2e463d91587053f6aa5ded8a0d6bdaa6	k__Bacteria; p__Firmicutes; c__Clostridia; o__Clostridiales; f__Ruminococcaceae; g__Ruminococcus; s__	0.0	0.0	0.0	0.0	0.0	0.0	23.0	0.0	0.0	0.0	0.0	42.0	0.0	0.0	0.0	0.0	0.0	0.0	26.0	0.0	0.0	0.0	47.0	0.0	70.0	44.0	0.0	0.0	0.0	0.0	0.0	80.0	0.0	13.0	38.0	0.0	0.0	29.0	0.0	0.0	0.0	40.0	0.0	22.0	0.0	38.0	0.0	0.0
44d049a0a5ae654ba0b7c6d0984d0fca	k__Bacteria; p__Firmicutes; c__Clostridia; o__Clostridiales; f__Veillonellaceae; g__Veillonella; s__dispar	0.0	0.0	0.0	0.0	0.0	0.0	0.0	0.0	0.0	0.0	0.0	0.0	0.0	0.0	0.0	0.0	0.0	0.0	0.0	25.0	0.0	0.0	46.0	0.0	0.0	0.0	0.0	0.0	0.0	0.0	0.0	16.0	0.0	0.0	0.0	0.0	0.0	0.0	0.0	0.0	0.0	0.0	0.0	0.0	44.0	0.0	0.0	10.0
7eff8132d73deb31aa585f554189ab52	k__Bacteria; p__Firmicutes; c__Clostridia; o__Clostridiales; f__Lachnospiraceae; g__; s__	48.0	191.0	0.0	0.0	0.0	432.0	0.0	39.0	0.0	237.0	0.0	35.0	0.0	82.0	16.0	0.0	47.0	80.0	0.0	268.0	0.0	32.0	49.0	0.0	0.0	56.0	89.0	0.0	44.0	0.0	28.0	29.0	0.0	162.0	0.0	33.0	37.0	30.0	204.0	0.0	0.0	0.0	0.0	0.0	0.0	0.0	29.0	0.0
45797b5351fba0925db0b93937bb381c	k__Bacteria; p__Proteobacteria; c__Gammaproteobacteria; o__Enterobacteriales; f__Enterobacteriaceae	24.0	0.0	1044.0	1320.0	206.0	29.0	839.0	0.0	45.0	113.0	50.0	4.0	0.0	74.0	0.0	33.0	46.0	299.0	0.0	38.0	114.0	34.0	0.0	54.0	51.0	0.0	0.0	70.0	43.0	0.0	66.0	20.0	111.0	66.0	0.0	48.0	1440.0	180.0	0.0	0.0	2824.0	362.0	46.0	0.0	75.0	0.0	45.0	48.0
370a55fde874734fe41bb1224b8db7dc	k__Bacteria; p__Firmicutes; c__Clostridia; o__Clostridiales; f__Dehalobacteriaceae; g__Dehalobacterium; s__	0.0	57.0	0.0	0.0	0.0	0.0	0.0	0.0	0.0	52.0	0.0	0.0	0.0	0.0	0.0	0.0	0.0	0.0	0.0	0.0	0.0	0.0	0.0	0.0	15.0	0.0	0.0	0.0	0.0	0.0	0.0	22.0	0.0	0.0	20.0	0.0	0.0	20.0	0.0	0.0	0.0	0.0	0.0	0.0	0.0	0.0	0.0	0.0
83a93857738ffbbbe49b98c5f424154c	k__Bacteria; p__Firmicutes; c__Clostridia; o__Clostridiales; f__Ruminococcaceae; g__Oscillospira; s__	0.0	24.0	0.0	0.0	0.0	44.0	0.0	0.0	0.0	0.0	156.0	0.0	0.0	0.0	0.0	0.0	0.0	0.0	0.0	0.0	0.0	0.0	0.0	0.0	0.0	0.0	285.0	0.0	0.0	0.0	0.0	0.0	0.0	0.0	109.0	0.0	0.0	0.0	0.0	0.0	0.0	0.0	0.0	0.0	0.0	0.0	0.0	0.0
8475cb84146fcadef30debbcfd61864e	k__Bacteria; p__Firmicutes; c__Clostridia; o__Clostridiales; f__Lachnospiraceae; g__Lachnospira; s__	0.0	85.0	0.0	33.0	0.0	63.0	0.0	0.0	0.0	26.0	0.0	0.0	0.0	0.0	0.0	0.0	0.0	148.0	0.0	0.0	0.0	82.0	53.0	0.0	0.0	143.0	66.0	33.0	40.0	25.0	93.0	21.0	0.0	0.0	34.0	82.0	43.0	0.0	0.0	250.0	0.0	28.0	49.0	27.0	152.0	17.0	0.0	38.0
def5ace00ea95339bcf0094c71d87b21	k__Bacteria; p__Firmicutes; c__Clostridia; o__Clostridiales; f__Lachnospiraceae; g__[Ruminococcus]; s__	0.0	0.0	0.0	35.0	0.0	0.0	45.0	0.0	0.0	0.0	0.0	12.0	0.0	0.0	0.0	0.0	0.0	0.0	0.0	0.0	0.0	0.0	0.0	0.0	0.0	0.0	0.0	36.0	0.0	0.0	0.0	0.0	0.0	0.0	54.0	0.0	0.0	0.0	0.0	0.0	0.0	0.0	0.0	0.0	0.0	0.0	0.0	0.0
a856f675a46f5dad57c1fd86670e95b8	k__Bacteria; p__Firmicutes; c__Clostridia; o__Clostridiales; f__Ruminococcaceae; g__Ruminococcus; s__	0.0	0.0	43.0	0.0	18.0	0.0	19.0	0.0	49.0	18.0	0.0	0.0	0.0	0.0	0.0	0.0	0.0	0.0	0.0	0.0	0.0	0.0	0.0	0.0	11.0	0.0	0.0	58.0	0.0	0.0	0.0	0.0	0.0	0.0	0.0	0.0	0.0	23.0	0.0	0.0	24.0	0.0	0.0	0.0	0.0	0.0	0.0	21.0
c58eb5fcf39751500672a2d51fbe3583	k__Bacteria; p__Firmicutes; c__Clostridia; o__Clostridiales; f__Ruminococcaceae; g__Oscillospira; s__	0.0	0.0	0.0	0.0	0.0	0.0	0.0	37.0	0.0	45.0	0.0	0.0	0.0	40.0	0.0	62.0	0.0	0.0	29.0	0.0	0.0	63.0	50.0	0.0	54.0	55.0	0.0	0.0	0.0	57.0	61.0	0.0	0.0	0.0	38.0	30.0	24.0	0.0	0.0	31.0	29.0	0.0	0.0	20.0	60.0	31.0	30.0	28.0
e212112ba463babc209ae3a3012d851e	k__Bacteria; p__Firmicutes; c__Clostridia; o__Clostridiales; f__Clostridiaceae; g__Clostridium; s__celatum	0.0	0.0	34.0	18.0	276.0	41.0	0.0	166.0	0.0	0.0	0.0	0.0	0.0	0.0	0.0	0.0	0.0	45.0	0.0	0.0	0.0	0.0	0.0	11.0	0.0	0.0	0.0	108.0	52.0	0.0	25.0	0.0	36.0	68.0	373.0	0.0	60.0	50.0	56.0	0.0	99.0	0.0	0.0	0.0	47.0	74.0	32.0	149.0
97c250d2fa1ee353cf385c1e0d012f37	k__Bacteria; p__Firmicutes; c__Clostridia; o__Clostridiales; f__Ruminococcaceae; g__Oscillospira; s__	0.0	38.0	0.0	0.0	56.0	0.0	0.0	0.0	0.0	64.0	0.0	12.0	16.0	23.0	0.0	20.0	25.0	0.0	33.0	42.0	0.0	28.0	26.0	21.0	26.0	19.0	0.0	0.0	0.0	23.0	0.0	0.0	0.0	0.0	28.0	0.0	20.0	31.0	0.0	47.0	0.0	12.0	0.0	0.0	0.0	13.0	0.0	25.0
eb47020c52b44d930418368776f48d8d	k__Bacteria; p__Firmicutes; c__Clostridia; o__Clostridiales; f__Lachnospiraceae; g__[Ruminococcus]; s__torques	34.0	0.0	39.0	0.0	133.0	0.0	0.0	31.0	0.0	0.0	0.0	0.0	0.0	0.0	0.0	70.0	45.0	0.0	50.0	0.0	49.0	86.0	31.0	0.0	33.0	37.0	29.0	0.0	48.0	42.0	30.0	27.0	33.0	38.0	75.0	0.0	0.0	100.0	0.0	0.0	0.0	256.0	0.0	53.0	0.0	25.0	49.0	128.0
539841bdc37f183003d2452682d6b4d0	k__Bacteria; p__Proteobacteria; c__Gammaproteobacteria; o__Pasteurellales; f__Pasteurellaceae; g__Haemophilus; s__parainfluenzae	0.0	0.0	0.0	0.0	0.0	0.0	0.0	27.0	72.0	0.0	0.0	0.0	0.0	17.0	47.0	0.0	0.0	0.0	0.0	37.0	0.0	19.0	0.0	0.0	0.0	0.0	0.0	0.0	0.0	0.0	0.0	27.0	0.0	0.0	0.0	37.0	30.0	0.0	12.0	0.0	0.0	0.0	23.0	0.0	50.0	0.0	0.0	32.0
9b82e59bc45341dba3e4038b483cf8ca	k__Bacteria; p__Bacteroidetes; c__Bacteroidia; o__Bacteroidales; f__[Barnesiellaceae]; g__; s__	0.0	24.0	0.0	0.0	29.0	0.0	0.0	0.0	0.0	0.0	0.0	0.0	0.0	0.0	0.0	52.0	0.0	0.0	0.0	0.0	0.0	0.0	0.0	0.0	0.0	0.0	18.0	0.0	0.0	0.0	0.0	0.0	0.0	0.0	0.0	0.0	0.0	0.0	0.0	0.0	0.0	0.0	0.0	0.0	0.0	0.0	0.0	0.0
63e3f6887f74d9a6e0b0eacee86a7e77	k__Bacteria; p__Firmicutes; c__Clostridia; o__Clostridiales; f__Lachnospiraceae; g__Clostridium; s__colinum	0.0	0.0	0.0	0.0	0.0	14.0	45.0	0.0	72.0	0.0	0.0	38.0	0.0	0.0	38.0	45.0	0.0	0.0	0.0	26.0	62.0	0.0	0.0	38.0	0.0	0.0	36.0	0.0	0.0	17.0	0.0	0.0	0.0	0.0	61.0	0.0	0.0	38.0	0.0	0.0	0.0	0.0	0.0	0.0	0.0	35.0	0.0	0.0
ebe19177c35d36bb4d87080857a1c50d	k__Bacteria; p__Firmicutes; c__Clostridia; o__Clostridiales; f__Lachnospiraceae; g__Clostridium; s__hathewayi	0.0	0.0	0.0	0.0	198.0	0.0	0.0	0.0	0.0	0.0	0.0	0.0	0.0	0.0	0.0	0.0	0.0	0.0	0.0	0.0	0.0	0.0	56.0	0.0	0.0	0.0	0.0	0.0	0.0	0.0	0.0	0.0	19.0	0.0	0.0	0.0	0.0	0.0	0.0	0.0	0.0	9.0	0.0	0.0	0.0	0.0	0.0	0.0
9e39a8fe401cdd2b7ffb50f24d73779e	k__Bacteria; p__Firmicutes; c__Clostridia; o__Clostridiales; f__Christensenellaceae; g__; s__	0.0	0.0	0.0	0.0	0.0	0.0	0.0	31.0	0.0	0.0	101.0	0.0	107.0	83.0	0.0	34.0	0.0	0.0	0.0	0.0	0.0	0.0	0.0	0.0	0.0	0.0	97.0	0.0	0.0	0.0	0.0	0.0	38.0	0.0	0.0	62.0	0.0	0.0	0.0	0.0	0.0	86.0	0.0	0.0	0.0	0.0	0.0	0.0
eeca36e555e0bf6f30af4d06d4deadd9	k__Bacteria; p__Firmicutes; c__Bacilli; o__Lactobacillales; f__Enterococcaceae; g__Enterococcus; s__	0.0	0.0	0.0	0.0	0.0	26.0	0.0	0.0	0.0	0.0	0.0	0.0	0.0	0.0	0.0	0.0	0.0	0.0	0.0	0.0	0.0	0.0	0.0	0.0	0.0	0.0	0.0	0.0	0.0	0.0	0.0	0.0	0.0	0.0	0.0	0.0	0.0	0.0	0.0	0.0	18.0	4.0	0.0	0.0	0.0	0.0	0.0	0.0
6b0cf4c0abdb151ffa4fa20f94125f31	k__Bacteria; p__Firmicutes; c__Bacilli; o__Lactobacillales; f__Streptococcaceae; g__Streptococcus	0.0	0.0	0.0	0.0	0.0	0.0	0.0	0.0	10.0	0.0	0.0	0.0	0.0	0.0	0.0	0.0	0.0	0.0	0.0	0.0	0.0	0.0	0.0	0.0	0.0	0.0	0.0	0.0	0.0	0.0	0.0	0.0	0.0	0.0	0.0	0.0	0.0	0.0	0.0	0.0	17.0	0.0	0.0	0.0	0.0	0.0	0.0	24.0
6223e80c1e5ecc1ead90c00e2bf3e592	k__Bacteria; p__Firmicutes; c__Clostridia; o__Clostridiales; f__Lachnospiraceae	0.0	0.0	0.0	0.0	0.0	0.0	0.0	0.0	0.0	0.0	0.0	0.0	0.0	0.0	0.0	0.0	0.0	0.0	0.0	0.0	0.0	0.0	0.0	28.0	0.0	0.0	0.0	26.0	0.0	0.0	0.0	0.0	0.0	0.0	64.0	33.0	0.0	0.0	0.0	0.0	0.0	25.0	20.0	0.0	0.0	0.0	0.0	15.0
62752c7cbb8d0c648f42146b86addcf0	k__Bacteria; p__Firmicutes; c__Clostridia; o__Clostridiales; f__Lachnospiraceae	0.0	0.0	0.0	0.0	0.0	80.0	74.0	0.0	0.0	0.0	0.0	43.0	0.0	0.0	34.0	0.0	33.0	0.0	0.0	0.0	0.0	0.0	0.0	19.0	0.0	53.0	0.0	0.0	0.0	27.0	17.0	0.0	0.0	0.0	117.0	0.0	49.0	0.0	0.0	46.0	0.0	31.0	29.0	0.0	58.0	0.0	0.0	47.0
0f80f52a06295146216d2abeaa18f60c	k__Bacteria; p__Bacteroidetes; c__Bacteroidia; o__Bacteroidales; f__Bacteroidaceae; g__Bacteroides; s__	0.0	0.0	0.0	0.0	0.0	0.0	0.0	0.0	0.0	0.0	0.0	0.0	0.0	0.0	0.0	0.0	0.0	0.0	0.0	0.0	0.0	0.0	0.0	62.0	0.0	0.0	61.0	0.0	0.0	18.0	0.0	0.0	0.0	0.0	0.0	0.0	0.0	0.0	0.0	393.0	0.0	0.0	0.0	126.0	136.0	0.0	0.0	0.0
d88023d1e40837336c23c84d27b01041	k__Bacteria; p__Firmicutes; c__Clostridia; o__Clostridiales; f__Lachnospiraceae; g__Blautia; s__	0.0	0.0	0.0	0.0	0.0	0.0	0.0	0.0	0.0	0.0	0.0	0.0	0.0	0.0	0.0	0.0	0.0	0.0	0.0	0.0	0.0	0.0	0.0	0.0	0.0	0.0	0.0	0.0	11.0	0.0	0.0	0.0	0.0	0.0	36.0	43.0	0.0	0.0	0.0	0.0	0.0	12.0	12.0	0.0	0.0	0.0	0.0	0.0
f28a5c0a6e0e5ec2bb79c530841e83f6	k__Bacteria; p__Bacteroidetes; c__Bacteroidia; o__Bacteroidales; f__Porphyromonadaceae; g__Parabacteroides; s__distasonis	0.0	0.0	0.0	0.0	0.0	57.0	0.0	0.0	0.0	0.0	0.0	0.0	0.0	0.0	0.0	0.0	0.0	0.0	0.0	0.0	0.0	0.0	0.0	0.0	0.0	0.0	0.0	0.0	0.0	0.0	0.0	0.0	0.0	0.0	140.0	0.0	0.0	0.0	0.0	0.0	0.0	0.0	72.0	0.0	0.0	0.0	0.0	142.0
57fc8b4757d129f7655a6e36aa67c675	k__Bacteria; p__Firmicutes; c__Clostridia; o__Clostridiales; f__Veillonellaceae; g__Acidaminococcus; s__	0.0	0.0	0.0	0.0	42.0	0.0	0.0	108.0	0.0	172.0	0.0	0.0	0.0	24.0	33.0	0.0	0.0	0.0	0.0	0.0	0.0	0.0	0.0	0.0	0.0	0.0	0.0	0.0	0.0	0.0	0.0	0.0	0.0	0.0	0.0	0.0	0.0	0.0	0.0	0.0	0.0	0.0	0.0	0.0	20.0	0.0	0.0	0.0
10849b5bcc75d435b08505f41985a272	k__Bacteria; p__Firmicutes; c__Clostridia; o__Clostridiales; f__Lachnospiraceae	67.0	46.0	0.0	22.0	0.0	36.0	102.0	26.0	0.0	66.0	22.0	0.0	71.0	26.0	0.0	41.0	38.0	33.0	49.0	64.0	59.0	31.0	60.0	51.0	26.0	51.0	34.0	52.0	49.0	42.0	27.0	56.0	46.0	0.0	113.0	56.0	37.0	55.0	0.0	0.0	0.0	0.0	24.0	61.0	77.0	33.0	29.0	106.0
8c11498e374f3f0f9125390e4f25d81a	k__Bacteria; p__Firmicutes; c__Clostridia; o__Clostridiales; f__Lachnospiraceae; g__Anaerostipes; s__	0.0	0.0	0.0	63.0	0.0	0.0	39.0	0.0	0.0	28.0	0.0	34.0	0.0	0.0	27.0	0.0	0.0	52.0	40.0	33.0	28.0	0.0	0.0	0.0	0.0	0.0	0.0	26.0	0.0	0.0	26.0	0.0	0.0	0.0	42.0	0.0	0.0	0.0	0.0	0.0	0.0	0.0	43.0	0.0	70.0	0.0	0.0	0.0
b211a85ea70bf98b634be1597b8b2bfe	k__Bacteria; p__Firmicutes; c__Clostridia; o__Clostridiales	0.0	46.0	0.0	0.0	67.0	53.0	26.0	147.0	34.0	0.0	0.0	0.0	0.0	31.0	0.0	0.0	0.0	0.0	10.0	0.0	0.0	0.0	0.0	0.0	0.0	0.0	0.0	23.0	0.0	0.0	6.0	0.0	50.0	0.0	34.0	0.0	38.0	44.0	0.0	0.0	35.0	0.0	0.0	0.0	0.0	0.0	0.0	40.0
c112bd1d437f32bf6ddde06c0c9a9fa5	k__Bacteria; p__Firmicutes; c__Clostridia; o__Clostridiales; f__Lachnospiraceae; g__Clostridium; s__lavalense	0.0	0.0	0.0	0.0	33.0	0.0	0.0	0.0	0.0	0.0	0.0	0.0	0.0	0.0	0.0	0.0	0.0	0.0	0.0	0.0	0.0	16.0	0.0	0.0	0.0	0.0	0.0	0.0	0.0	0.0	0.0	0.0	0.0	0.0	0.0	0.0	0.0	0.0	0.0	0.0	0.0	0.0	0.0	0.0	0.0	0.0	0.0	13.0
55c7936ac4f14b2d8c9df5720ae732ef	k__Bacteria; p__Firmicutes; c__Clostridia; o__Clostridiales; f__Ruminococcaceae; g__Oscillospira; s__	0.0	0.0	0.0	0.0	0.0	0.0	0.0	0.0	0.0	0.0	0.0	45.0	0.0	0.0	0.0	0.0	0.0	0.0	0.0	0.0	0.0	25.0	57.0	0.0	0.0	28.0	28.0	0.0	0.0	21.0	0.0	0.0	0.0	0.0	0.0	0.0	27.0	0.0	0.0	58.0	0.0	0.0	0.0	0.0	0.0	0.0	0.0	10.0
f96258f080bc4ffa8048be15ba27c5c6	k__Bacteria; p__Firmicutes; c__Clostridia; o__Clostridiales; f__Christensenellaceae; g__; s__	0.0	0.0	0.0	0.0	0.0	18.0	0.0	0.0	0.0	0.0	31.0	0.0	0.0	0.0	0.0	0.0	0.0	56.0	0.0	0.0	0.0	0.0	0.0	0.0	0.0	0.0	57.0	0.0	0.0	0.0	0.0	0.0	0.0	0.0	0.0	23.0	0.0	0.0	0.0	0.0	0.0	0.0	0.0	0.0	0.0	0.0	0.0	0.0
0cdea8ef6090cbe262eadc10e8f3e063	k__Bacteria; p__Firmicutes; c__Clostridia; o__Clostridiales; f__; g__; s__	0.0	0.0	0.0	0.0	0.0	0.0	0.0	0.0	0.0	0.0	0.0	0.0	41.0	0.0	0.0	26.0	0.0	0.0	0.0	0.0	0.0	0.0	52.0	0.0	0.0	0.0	0.0	0.0	0.0	0.0	0.0	0.0	0.0	0.0	0.0	28.0	15.0	24.0	0.0	0.0	0.0	0.0	0.0	0.0	0.0	0.0	0.0	0.0
c0c9f2bb189487156981a13cbcbf32e7	k__Bacteria; p__Bacteroidetes; c__Bacteroidia; o__Bacteroidales; f__[Paraprevotellaceae]; g__Paraprevotella; s__	0.0	0.0	0.0	0.0	54.0	42.0	0.0	0.0	0.0	0.0	0.0	53.0	0.0	0.0	42.0	0.0	0.0	0.0	0.0	0.0	0.0	36.0	0.0	178.0	0.0	168.0	0.0	0.0	0.0	0.0	0.0	0.0	0.0	0.0	0.0	383.0	410.0	29.0	0.0	107.0	0.0	0.0	0.0	12.0	0.0	0.0	0.0	0.0
33b32e47b3a8e6f4a336146484c10a7a	k__Bacteria; p__Firmicutes; c__Clostridia; o__Clostridiales; f__Lachnospiraceae; g__Clostridium; s__colinum	0.0	0.0	0.0	0.0	0.0	18.0	0.0	0.0	0.0	0.0	0.0	0.0	0.0	0.0	16.0	24.0	0.0	0.0	0.0	28.0	0.0	0.0	0.0	24.0	0.0	0.0	0.0	0.0	0.0	0.0	0.0	0.0	0.0	0.0	0.0	0.0	0.0	46.0	0.0	0.0	0.0	0.0	0.0	0.0	0.0	0.0	0.0	0.0
3104a740a2fcc7a9b9c71c83d6813e48	k__Bacteria; p__Firmicutes; c__Clostridia; o__Clostridiales; f__Ruminococcaceae; g__; s__	0.0	0.0	0.0	0.0	0.0	0.0	0.0	0.0	0.0	0.0	0.0	27.0	0.0	0.0	0.0	0.0	0.0	0.0	0.0	0.0	0.0	0.0	0.0	0.0	0.0	0.0	59.0	0.0	7.0	0.0	0.0	0.0	48.0	0.0	0.0	27.0	0.0	0.0	0.0	0.0	0.0	0.0	0.0	0.0	0.0	0.0	0.0	0.0
9823e14478f6bda07dbe005a45d204fe	k__Bacteria; p__Firmicutes; c__Clostridia; o__Clostridiales; f__Lachnospiraceae; g__Dorea; s__formicigenerans	0.0	0.0	0.0	0.0	0.0	0.0	0.0	0.0	0.0	0.0	0.0	0.0	0.0	0.0	0.0	0.0	0.0	0.0	0.0	0.0	0.0	0.0	0.0	0.0	0.0	24.0	0.0	0.0	0.0	0.0	0.0	0.0	0.0	0.0	23.0	26.0	0.0	0.0	0.0	0.0	0.0	0.0	0.0	0.0	0.0	0.0	0.0	12.0
0aab8c484d690526d40e5278593b4bfa	k__Bacteria; p__Firmicutes; c__Clostridia; o__Clostridiales; f__Ruminococcaceae; g__; s__	90.0	78.0	0.0	0.0	0.0	67.0	0.0	0.0	44.0	0.0	0.0	37.0	0.0	0.0	0.0	24.0	0.0	0.0	46.0	0.0	0.0	0.0	0.0	0.0	0.0	0.0	0.0	0.0	0.0	39.0	0.0	0.0	0.0	34.0	80.0	32.0	0.0	50.0	0.0	0.0	0.0	0.0	37.0	0.0	0.0	55.0	0.0	28.0
5865109da2acd01990bca72f5cb51336	k__Bacteria; p__Firmicutes; c__Clostridia; o__Clostridiales; f__Ruminococcaceae; g__Ruminococcus; s__	0.0	0.0	0.0	0.0	55.0	0.0	0.0	0.0	0.0	29.0	0.0	0.0	0.0	0.0	0.0	0.0	23.0	0.0	0.0	0.0	0.0	0.0	0.0	0.0	28.0	0.0	43.0	0.0	0.0	29.0	0.0	0.0	0.0	37.0	0.0	27.0	0.0	42.0	0.0	0.0	0.0	0.0	0.0	0.0	0.0	0.0	0.0	0.0
158d881e9247b9348eddbe40da5f30d2	k__Bacteria; p__Firmicutes; c__Clostridia; o__Clostridiales; f__Lachnospiraceae; g__Coprococcus; s__	0.0	0.0	0.0	0.0	0.0	0.0	0.0	0.0	0.0	0.0	0.0	0.0	0.0	0.0	43.0	0.0	0.0	0.0	0.0	0.0	0.0	0.0	0.0	0.0	0.0	0.0	0.0	0.0	0.0	0.0	0.0	0.0	0.0	0.0	48.0	61.0	0.0	0.0	0.0	0.0	0.0	0.0	0.0	0.0	131.0	0.0	0.0	0.0
0c958605efb24580519f276b903997eb	k__Bacteria; p__Firmicutes; c__Clostridia; o__Clostridiales; f__Lachnospiraceae	0.0	0.0	0.0	0.0	19.0	0.0	0.0	0.0	0.0	0.0	0.0	0.0	0.0	0.0	0.0	0.0	0.0	0.0	0.0	0.0	0.0	0.0	0.0	0.0	0.0	0.0	0.0	0.0	0.0	0.0	0.0	0.0	0.0	0.0	0.0	0.0	23.0	63.0	0.0	0.0	0.0	0.0	0.0	45.0	0.0	0.0	0.0	101.0
83b764acf68a9c950209e82fa1f22803	k__Bacteria; p__Bacteroidetes; c__Bacteroidia; o__Bacteroidales; f__[Paraprevotellaceae]; g__Paraprevotella; s__	0.0	0.0	0.0	0.0	0.0	27.0	0.0	0.0	0.0	0.0	0.0	0.0	0.0	0.0	0.0	0.0	42.0	0.0	0.0	0.0	0.0	0.0	0.0	0.0	0.0	0.0	0.0	0.0	158.0	0.0	0.0	21.0	0.0	0.0	0.0	0.0	0.0	0.0	0.0	0.0	16.0	0.0	0.0	0.0	0.0	0.0	0.0	0.0
c1f64af2b36c520dde166cf25c7a99d2	k__Bacteria; p__Firmicutes; c__Clostridia; o__Clostridiales; f__Lachnospiraceae	0.0	0.0	0.0	0.0	0.0	0.0	75.0	0.0	0.0	0.0	0.0	0.0	0.0	0.0	0.0	129.0	0.0	0.0	0.0	0.0	0.0	39.0	46.0	0.0	47.0	58.0	0.0	0.0	0.0	38.0	13.0	0.0	30.0	0.0	21.0	0.0	0.0	0.0	28.0	104.0	0.0	0.0	0.0	0.0	0.0	0.0	0.0	72.0
cad6354524fc6d98f2a843a8f777e21d	k__Bacteria; p__Firmicutes; c__Clostridia; o__Clostridiales; f__Lachnospiraceae; g__[Ruminococcus]; s__gnavus	0.0	0.0	164.0	20.0	0.0	0.0	46.0	0.0	0.0	0.0	0.0	0.0	0.0	0.0	0.0	0.0	0.0	0.0	0.0	0.0	36.0	0.0	29.0	0.0	26.0	0.0	0.0	96.0	0.0	0.0	0.0	0.0	0.0	0.0	0.0	0.0	0.0	0.0	0.0	0.0	110.0	0.0	0.0	0.0	0.0	0.0	0.0	0.0
ea13dea8d366ddd4c84703e662e67c40	k__Bacteria; p__Firmicutes; c__Clostridia; o__Clostridiales; f__Ruminococcaceae; g__Oscillospira; s__	0.0	0.0	0.0	0.0	0.0	34.0	0.0	0.0	0.0	283.0	0.0	0.0	0.0	38.0	0.0	0.0	0.0	44.0	0.0	0.0	0.0	0.0	0.0	0.0	0.0	0.0	39.0	0.0	0.0	0.0	0.0	0.0	64.0	48.0	27.0	0.0	0.0	0.0	0.0	0.0	0.0	0.0	0.0	0.0	0.0	0.0	0.0	75.0
6d97aa66d42259de1bfb00bfdf40a74c	k__Bacteria; p__Firmicutes; c__Clostridia; o__Clostridiales; f__Ruminococcaceae; g__Ruminococcus; s__bromii	41.0	0.0	0.0	0.0	57.0	0.0	0.0	0.0	0.0	0.0	0.0	0.0	42.0	0.0	0.0	0.0	0.0	31.0	0.0	0.0	0.0	0.0	0.0	0.0	0.0	0.0	17.0	0.0	0.0	0.0	0.0	53.0	0.0	25.0	0.0	43.0	0.0	0.0	0.0	0.0	0.0	0.0	113.0	0.0	27.0	0.0	21.0	0.0
1d9d48c219632e37913f982b0a0c1ea6	k__Bacteria; p__Bacteroidetes; c__Bacteroidia; o__Bacteroidales; f__[Odoribacteraceae]; g__Butyricimonas; s__	0.0	0.0	0.0	0.0	0.0	0.0	0.0	0.0	0.0	0.0	0.0	50.0	0.0	0.0	0.0	0.0	0.0	0.0	0.0	0.0	0.0	0.0	0.0	0.0	0.0	0.0	0.0	0.0	0.0	0.0	34.0	0.0	0.0	0.0	0.0	0.0	0.0	0.0	0.0	0.0	0.0	0.0	0.0	0.0	0.0	0.0	20.0	0.0
f43878a8a1cfe908d7966ba794a6e97b	k__Bacteria; p__Bacteroidetes; c__Bacteroidia; o__Bacteroidales; f__Rikenellaceae; g__Alistipes; s__putredinis	79.0	259.0	0.0	0.0	600.0	85.0	51.0	553.0	151.0	497.0	0.0	276.0	25.0	48.0	79.0	0.0	0.0	16.0	211.0	0.0	0.0	119.0	604.0	265.0	0.0	0.0	329.0	41.0	0.0	63.0	277.0	75.0	93.0	110.0	780.0	172.0	506.0	568.0	120.0	0.0	0.0	71.0	194.0	100.0	156.0	110.0	138.0	0.0
64495f930976f453b4067cb19398db25	k__Bacteria; p__Proteobacteria; c__Betaproteobacteria; o__Burkholderiales; f__Alcaligenaceae; g__Sutterella; s__	0.0	0.0	0.0	0.0	0.0	0.0	0.0	0.0	0.0	34.0	0.0	0.0	0.0	0.0	0.0	0.0	0.0	0.0	0.0	0.0	0.0	0.0	0.0	74.0	0.0	0.0	53.0	0.0	0.0	0.0	0.0	0.0	0.0	0.0	23.0	0.0	53.0	0.0	15.0	24.0	0.0	0.0	21.0	0.0	42.0	0.0	0.0	0.0
253b6966047fb87561dc11f00ecbe613	k__Bacteria; p__Firmicutes; c__Clostridia; o__Clostridiales; f__Ruminococcaceae; g__; s__	0.0	83.0	0.0	0.0	0.0	0.0	0.0	0.0	0.0	0.0	78.0	0.0	0.0	0.0	0.0	0.0	0.0	0.0	0.0	0.0	0.0	0.0	0.0	0.0	0.0	0.0	53.0	0.0	46.0	0.0	0.0	0.0	22.0	45.0	71.0	20.0	0.0	28.0	35.0	0.0	0.0	67.0	0.0	0.0	0.0	0.0	0.0	0.0
4709723e8a75955c16e41a4f804c1bf2	k__Bacteria; p__Firmicutes; c__Clostridia; o__Clostridiales; f__Ruminococcaceae; g__Ruminococcus; s__	0.0	0.0	0.0	0.0	81.0	0.0	0.0	0.0	0.0	32.0	0.0	0.0	0.0	0.0	0.0	0.0	0.0	0.0	0.0	0.0	0.0	0.0	0.0	0.0	55.0	0.0	38.0	0.0	0.0	24.0	0.0	0.0	0.0	27.0	0.0	14.0	0.0	65.0	0.0	0.0	0.0	0.0	0.0	0.0	0.0	0.0	0.0	0.0
46e183b941d992a5ad8aa774dd957253	k__Bacteria; p__Firmicutes; c__Clostridia; o__Clostridiales; f__Christensenellaceae; g__; s__	0.0	0.0	0.0	0.0	0.0	0.0	0.0	0.0	0.0	0.0	0.0	0.0	50.0	0.0	0.0	0.0	0.0	0.0	0.0	0.0	0.0	0.0	0.0	0.0	0.0	0.0	61.0	0.0	94.0	0.0	0.0	0.0	0.0	0.0	36.0	38.0	0.0	0.0	0.0	0.0	0.0	37.0	0.0	0.0	0.0	0.0	0.0	0.0
7939dbb6a06e68363c2946a960d9ab90	k__Bacteria; p__Firmicutes; c__Clostridia; o__Clostridiales; f__Ruminococcaceae; g__Ruminococcus; s__	0.0	0.0	0.0	0.0	0.0	0.0	0.0	0.0	0.0	0.0	0.0	0.0	11.0	0.0	0.0	15.0	0.0	0.0	0.0	0.0	0.0	0.0	0.0	32.0	0.0	34.0	0.0	0.0	28.0	0.0	0.0	0.0	0.0	0.0	0.0	374.0	0.0	0.0	0.0	32.0	0.0	0.0	0.0	0.0	0.0	0.0	0.0	0.0
dc931d790f1f0f30a6658718aa6d298b	k__Bacteria; p__Firmicutes; c__Erysipelotrichi; o__Erysipelotrichales; f__Erysipelotrichaceae; g__Holdemania; s__	0.0	0.0	0.0	0.0	0.0	0.0	0.0	0.0	0.0	40.0	0.0	0.0	0.0	0.0	0.0	0.0	11.0	0.0	0.0	0.0	0.0	0.0	0.0	0.0	0.0	0.0	0.0	0.0	0.0	0.0	0.0	0.0	0.0	0.0	0.0	0.0	0.0	0.0	0.0	0.0	0.0	0.0	0.0	0.0	0.0	0.0	0.0	11.0
b7548ea4e6f5d16bb9846b7cd5b3d72f	k__Bacteria; p__Firmicutes; c__Clostridia; o__SHA-98; f__; g__; s__	0.0	15.0	0.0	0.0	52.0	0.0	0.0	0.0	0.0	0.0	0.0	14.0	0.0	0.0	0.0	0.0	0.0	0.0	0.0	0.0	0.0	0.0	0.0	0.0	0.0	0.0	22.0	0.0	0.0	0.0	0.0	0.0	0.0	0.0	27.0	0.0	0.0	0.0	0.0	0.0	0.0	0.0	0.0	0.0	0.0	0.0	0.0	23.0
8632a1e9d4a9297365499a2f6019ed6e	k__Bacteria; p__Actinobacteria; c__Coriobacteriia; o__Coriobacteriales; f__Coriobacteriaceae; g__Eggerthella; s__lenta	0.0	0.0	7.0	0.0	17.0	0.0	0.0	0.0	0.0	0.0	0.0	0.0	0.0	0.0	0.0	0.0	0.0	0.0	0.0	0.0	0.0	0.0	0.0	0.0	0.0	0.0	0.0	0.0	0.0	0.0	0.0	0.0	0.0	0.0	0.0	0.0	0.0	0.0	0.0	0.0	0.0	12.0	0.0	0.0	0.0	0.0	0.0	0.0
d905c802fceb141ce6096912ff099f88	k__Bacteria; p__Firmicutes; c__Clostridia; o__Clostridiales; f__Lachnospiraceae; g__Blautia; s__	0.0	0.0	0.0	0.0	0.0	0.0	0.0	0.0	0.0	0.0	0.0	0.0	0.0	0.0	0.0	0.0	0.0	0.0	0.0	0.0	0.0	0.0	0.0	0.0	0.0	0.0	0.0	0.0	0.0	0.0	0.0	0.0	0.0	0.0	45.0	0.0	0.0	0.0	0.0	0.0	0.0	0.0	0.0	0.0	0.0	0.0	39.0	0.0
7c69fed61bad5ccfc95245384318fabb	k__Bacteria; p__Firmicutes; c__Clostridia; o__Clostridiales; f__Lachnospiraceae; g__Clostridium; s__hathewayi	0.0	0.0	0.0	0.0	20.0	0.0	0.0	0.0	0.0	0.0	0.0	0.0	0.0	0.0	0.0	0.0	0.0	0.0	0.0	0.0	0.0	0.0	0.0	0.0	0.0	0.0	0.0	0.0	0.0	0.0	0.0	0.0	0.0	0.0	0.0	0.0	0.0	0.0	0.0	0.0	0.0	27.0	0.0	0.0	0.0	0.0	0.0	38.0
682c7195a47e820c05c6e4c2178d5f17	k__Bacteria; p__Bacteroidetes; c__Bacteroidia; o__Bacteroidales; f__Porphyromonadaceae; g__Parabacteroides; s__distasonis	0.0	0.0	0.0	0.0	0.0	0.0	0.0	0.0	0.0	86.0	0.0	0.0	0.0	0.0	0.0	0.0	0.0	0.0	0.0	0.0	0.0	0.0	0.0	0.0	0.0	0.0	0.0	0.0	0.0	0.0	0.0	0.0	0.0	0.0	0.0	0.0	0.0	0.0	0.0	0.0	0.0	0.0	0.0	0.0	0.0	0.0	0.0	0.0
4826b21be951dbc4f2d1ac10dc59de57	k__Bacteria; p__Firmicutes; c__Clostridia; o__Clostridiales; f__Ruminococcaceae; g__Anaerotruncus; s__	0.0	0.0	0.0	0.0	187.0	0.0	0.0	0.0	0.0	0.0	0.0	0.0	0.0	0.0	0.0	0.0	0.0	0.0	0.0	0.0	0.0	0.0	0.0	0.0	0.0	0.0	0.0	0.0	0.0	0.0	63.0	0.0	0.0	0.0	40.0	10.0	0.0	0.0	0.0	0.0	0.0	0.0	0.0	0.0	0.0	0.0	0.0	0.0
b3704fcd600c186b92312d57603e98b4	k__Bacteria; p__Firmicutes; c__Erysipelotrichi; o__Erysipelotrichales; f__Erysipelotrichaceae; g__Holdemania; s__	0.0	0.0	0.0	0.0	0.0	0.0	0.0	0.0	0.0	0.0	0.0	0.0	0.0	0.0	0.0	0.0	0.0	0.0	36.0	0.0	0.0	0.0	58.0	0.0	0.0	0.0	0.0	0.0	0.0	32.0	0.0	0.0	0.0	0.0	26.0	12.0	31.0	0.0	0.0	0.0	0.0	0.0	0.0	0.0	0.0	0.0	0.0	37.0
f18463b58f371de5a71b346a8395bff1	k__Bacteria; p__Firmicutes; c__Clostridia; o__Clostridiales; f__Christensenellaceae; g__; s__	0.0	0.0	0.0	0.0	0.0	0.0	0.0	0.0	0.0	0.0	59.0	0.0	54.0	0.0	0.0	0.0	18.0	0.0	0.0	0.0	0.0	0.0	0.0	0.0	0.0	0.0	48.0	0.0	0.0	0.0	0.0	0.0	90.0	61.0	0.0	37.0	0.0	0.0	0.0	0.0	0.0	80.0	0.0	0.0	0.0	0.0	34.0	0.0
4c0bc1c8179907d016c7c6abd7a79f13	k__Bacteria; p__Firmicutes; c__Clostridia; o__Clostridiales; f__; g__; s__	0.0	0.0	0.0	0.0	0.0	0.0	0.0	0.0	0.0	0.0	0.0	43.0	0.0	0.0	0.0	0.0	0.0	34.0	0.0	0.0	0.0	0.0	0.0	45.0	0.0	0.0	0.0	0.0	0.0	0.0	0.0	0.0	0.0	0.0	0.0	0.0	9.0	0.0	0.0	0.0	0.0	0.0	0.0	0.0	0.0	0.0	0.0	0.0
9e4674b7439d61d4068163285d3e69b4	k__Bacteria; p__Firmicutes; c__Clostridia; o__Clostridiales; f__[Mogibacteriaceae]; g__; s__	0.0	0.0	0.0	0.0	0.0	0.0	0.0	0.0	0.0	31.0	0.0	0.0	0.0	0.0	0.0	0.0	0.0	0.0	0.0	0.0	0.0	0.0	0.0	0.0	0.0	0.0	0.0	0.0	0.0	0.0	0.0	0.0	0.0	0.0	37.0	0.0	0.0	32.0	0.0	0.0	0.0	0.0	0.0	0.0	0.0	0.0	42.0	0.0
bc689f18910ffa834dcc29b13acbd914	k__Bacteria; p__Firmicutes; c__Erysipelotrichi; o__Erysipelotrichales; f__Erysipelotrichaceae; g__Coprobacillus; s__cateniformis	0.0	0.0	0.0	0.0	0.0	0.0	0.0	0.0	0.0	0.0	0.0	0.0	0.0	0.0	0.0	43.0	0.0	0.0	14.0	0.0	0.0	0.0	0.0	0.0	0.0	0.0	0.0	0.0	0.0	0.0	0.0	0.0	0.0	0.0	0.0	0.0	0.0	0.0	0.0	0.0	0.0	44.0	0.0	0.0	0.0	0.0	0.0	0.0
b2ec3c29a646d6972a1fe4526e9cf22b	k__Bacteria; p__Firmicutes; c__Clostridia; o__Clostridiales; f__Ruminococcaceae; g__; s__	0.0	0.0	0.0	0.0	147.0	0.0	0.0	0.0	0.0	0.0	0.0	0.0	0.0	0.0	0.0	0.0	0.0	0.0	0.0	0.0	0.0	0.0	36.0	0.0	62.0	0.0	0.0	0.0	0.0	0.0	0.0	0.0	0.0	0.0	0.0	0.0	47.0	0.0	0.0	0.0	0.0	0.0	0.0	0.0	0.0	0.0	0.0	0.0
d2cdca7443c8d9c712882634f8bfe2de	k__Bacteria; p__Firmicutes; c__Clostridia; o__Clostridiales; f__Ruminococcaceae	0.0	52.0	0.0	0.0	0.0	94.0	0.0	0.0	0.0	0.0	27.0	0.0	24.0	0.0	0.0	0.0	0.0	41.0	26.0	0.0	0.0	0.0	0.0	0.0	0.0	0.0	48.0	0.0	78.0	0.0	0.0	0.0	0.0	0.0	0.0	110.0	0.0	0.0	0.0	0.0	0.0	25.0	0.0	0.0	0.0	0.0	19.0	0.0
694cc5ad885c10dde9d512047b93bcfa	k__Bacteria; p__Firmicutes; c__Bacilli; o__Lactobacillales; f__Enterococcaceae; g__Enterococcus; s__	0.0	0.0	0.0	35.0	14.0	25.0	0.0	0.0	0.0	60.0	0.0	0.0	0.0	23.0	0.0	0.0	0.0	0.0	0.0	0.0	0.0	64.0	0.0	0.0	0.0	0.0	0.0	46.0	0.0	0.0	0.0	0.0	0.0	0.0	0.0	0.0	0.0	115.0	0.0	0.0	22.0	42.0	0.0	0.0	0.0	0.0	0.0	0.0
fd9cabb9db86ef5e8ca568f293aa7985	k__Bacteria; p__Firmicutes; c__Clostridia; o__Clostridiales; f__Veillonellaceae; g__Veillonella	0.0	0.0	0.0	0.0	0.0	0.0	6.0	0.0	0.0	0.0	0.0	0.0	0.0	0.0	4.0	0.0	0.0	0.0	0.0	0.0	0.0	0.0	0.0	0.0	0.0	0.0	0.0	0.0	0.0	0.0	0.0	0.0	0.0	0.0	0.0	0.0	31.0	0.0	0.0	0.0	32.0	0.0	0.0	0.0	6.0	0.0	0.0	11.0
bfce074267ff716e1054218f7da570d1	k__Bacteria; p__Firmicutes; c__Clostridia; o__Clostridiales; f__Ruminococcaceae; g__Oscillospira; s__	0.0	0.0	0.0	0.0	0.0	0.0	0.0	0.0	0.0	0.0	0.0	27.0	0.0	0.0	0.0	0.0	0.0	0.0	0.0	34.0	0.0	0.0	0.0	0.0	0.0	0.0	0.0	0.0	0.0	0.0	0.0	0.0	0.0	0.0	0.0	0.0	0.0	0.0	0.0	0.0	0.0	0.0	0.0	0.0	0.0	0.0	0.0	0.0
0f0029336385e3045a3d6910ab3bda07	k__Bacteria; p__Firmicutes; c__Clostridia; o__Clostridiales; f__Ruminococcaceae	0.0	0.0	0.0	0.0	0.0	0.0	0.0	0.0	0.0	0.0	0.0	0.0	0.0	0.0	0.0	0.0	0.0	37.0	0.0	0.0	0.0	0.0	47.0	0.0	0.0	0.0	0.0	0.0	0.0	0.0	35.0	18.0	0.0	0.0	0.0	35.0	18.0	0.0	0.0	0.0	0.0	0.0	0.0	0.0	0.0	0.0	0.0	0.0
6dac68e6e35574828d6221cf2387ce70	k__Bacteria; p__Firmicutes; c__Clostridia; o__Clostridiales; f__Ruminococcaceae; g__Ruminococcus; s__	0.0	0.0	0.0	0.0	0.0	36.0	0.0	0.0	0.0	0.0	0.0	50.0	0.0	0.0	0.0	0.0	0.0	0.0	0.0	0.0	0.0	0.0	0.0	0.0	0.0	0.0	50.0	0.0	0.0	0.0	0.0	0.0	55.0	0.0	0.0	0.0	0.0	0.0	0.0	0.0	0.0	0.0	0.0	0.0	0.0	0.0	0.0	0.0
1d21c81f3299776029cebb3a6116878c	k__Bacteria; p__Bacteroidetes; c__Bacteroidia; o__Bacteroidales; f__Bacteroidaceae; g__Bacteroides; s__ovatus	0.0	0.0	0.0	0.0	0.0	0.0	4.0	0.0	0.0	0.0	0.0	3.0	0.0	0.0	0.0	21.0	0.0	0.0	0.0	0.0	0.0	7.0	0.0	0.0	0.0	0.0	0.0	0.0	0.0	0.0	0.0	0.0	0.0	0.0	0.0	0.0	0.0	0.0	0.0	0.0	0.0	0.0	0.0	0.0	22.0	0.0	0.0	0.0
d6b0ef398291f7afe9de240cf41cc869	k__Bacteria; p__Firmicutes; c__Clostridia; o__Clostridiales; f__Christensenellaceae; g__; s__	0.0	0.0	0.0	0.0	0.0	0.0	0.0	0.0	0.0	0.0	0.0	0.0	0.0	0.0	0.0	0.0	0.0	0.0	0.0	0.0	0.0	0.0	0.0	0.0	0.0	46.0	0.0	0.0	0.0	0.0	5.0	0.0	0.0	0.0	0.0	0.0	0.0	0.0	0.0	8.0	0.0	0.0	0.0	0.0	0.0	0.0	0.0	0.0
a6fe3688413a61558b5d629868808b5d	k__Bacteria; p__Firmicutes; c__Clostridia; o__Clostridiales; f__Ruminococcaceae; g__Ruminococcus; s__callidus	0.0	0.0	0.0	0.0	0.0	52.0	0.0	0.0	0.0	0.0	0.0	42.0	0.0	28.0	0.0	0.0	0.0	0.0	0.0	0.0	0.0	0.0	0.0	0.0	0.0	0.0	0.0	0.0	0.0	0.0	0.0	0.0	0.0	0.0	0.0	0.0	0.0	0.0	49.0	0.0	0.0	0.0	0.0	0.0	0.0	0.0	0.0	0.0
f7467de83ad6a3ef0f217a85fafcbdb2	k__Bacteria; p__Firmicutes; c__Clostridia; o__Clostridiales; f__Lachnospiraceae; g__[Ruminococcus]; s__torques	44.0	0.0	33.0	29.0	112.0	0.0	0.0	38.0	0.0	0.0	0.0	0.0	0.0	0.0	0.0	13.0	0.0	0.0	20.0	0.0	15.0	0.0	27.0	0.0	25.0	0.0	0.0	0.0	0.0	0.0	0.0	0.0	0.0	39.0	34.0	0.0	0.0	42.0	0.0	0.0	0.0	118.0	0.0	0.0	0.0	0.0	0.0	61.0
68d17df16da5f536dbf876f2ebf9aced	k__Bacteria; p__Firmicutes; c__Clostridia; o__Clostridiales; f__Ruminococcaceae; g__; s__	0.0	0.0	0.0	33.0	109.0	0.0	0.0	0.0	0.0	0.0	0.0	0.0	0.0	0.0	0.0	0.0	0.0	0.0	0.0	0.0	0.0	0.0	0.0	0.0	0.0	0.0	0.0	0.0	0.0	0.0	0.0	0.0	0.0	0.0	0.0	0.0	0.0	0.0	0.0	0.0	0.0	0.0	0.0	0.0	0.0	0.0	0.0	0.0
c73242873d750f3f92580fa0a8664bb9	k__Bacteria; p__Firmicutes; c__Clostridia; o__Clostridiales; f__Lachnospiraceae; g__Dorea; s__	70.0	26.0	0.0	52.0	0.0	0.0	52.0	0.0	0.0	19.0	0.0	18.0	0.0	77.0	75.0	0.0	73.0	78.0	52.0	0.0	0.0	0.0	46.0	38.0	0.0	48.0	13.0	131.0	0.0	0.0	0.0	0.0	33.0	0.0	54.0	68.0	0.0	113.0	0.0	0.0	0.0	32.0	35.0	31.0	0.0	0.0	0.0	90.0
ae25fcda0d6942ea800c460835c908ac	k__Bacteria; p__Firmicutes; c__Clostridia; o__Clostridiales; f__Lachnospiraceae; g__Coprococcus; s__catus	0.0	0.0	0.0	0.0	0.0	0.0	0.0	0.0	0.0	0.0	18.0	0.0	0.0	0.0	0.0	0.0	0.0	0.0	0.0	0.0	0.0	0.0	0.0	0.0	0.0	0.0	0.0	0.0	0.0	0.0	0.0	0.0	0.0	0.0	38.0	0.0	0.0	0.0	0.0	0.0	0.0	15.0	0.0	0.0	0.0	0.0	0.0	0.0
97054447a5ee58d25ba8dace38571928	k__Bacteria; p__Firmicutes; c__Clostridia; o__Clostridiales; f__Lachnospiraceae; g__Dorea; s__	43.0	31.0	0.0	35.0	0.0	0.0	34.0	0.0	0.0	46.0	42.0	41.0	0.0	77.0	70.0	0.0	47.0	60.0	84.0	31.0	0.0	0.0	52.0	34.0	0.0	34.0	27.0	145.0	77.0	0.0	0.0	37.0	0.0	29.0	51.0	41.0	40.0	104.0	41.0	0.0	0.0	27.0	42.0	0.0	52.0	0.0	0.0	75.0
fef95328f235e2c37a4660c145a6fb39	k__Bacteria; p__Bacteroidetes; c__Bacteroidia; o__Bacteroidales; f__Rikenellaceae; g__; s__	0.0	9.0	0.0	0.0	45.0	0.0	0.0	0.0	27.0	40.0	45.0	0.0	0.0	0.0	0.0	0.0	62.0	0.0	0.0	0.0	0.0	0.0	0.0	0.0	0.0	45.0	0.0	0.0	34.0	62.0	0.0	31.0	0.0	10.0	96.0	0.0	181.0	96.0	0.0	0.0	0.0	47.0	17.0	10.0	0.0	0.0	0.0	0.0
cf127f4ddd00330373f0b37046235318	k__Bacteria; p__Firmicutes; c__Erysipelotrichi; o__Erysipelotrichales; f__Erysipelotrichaceae; g__; s__	0.0	37.0	0.0	0.0	0.0	0.0	0.0	0.0	226.0	0.0	0.0	0.0	0.0	0.0	0.0	0.0	0.0	51.0	0.0	0.0	0.0	0.0	0.0	4.0	0.0	0.0	0.0	0.0	0.0	0.0	0.0	0.0	0.0	0.0	0.0	0.0	0.0	0.0	38.0	18.0	0.0	18.0	0.0	0.0	41.0	0.0	0.0	0.0
6c37672e680123809d01af3e1f897b21	k__Bacteria; p__Firmicutes; c__Erysipelotrichi; o__Erysipelotrichales; f__Erysipelotrichaceae; g__; s__	0.0	45.0	0.0	0.0	0.0	0.0	0.0	0.0	236.0	0.0	0.0	0.0	0.0	0.0	0.0	0.0	0.0	54.0	0.0	0.0	0.0	0.0	0.0	9.0	0.0	0.0	0.0	0.0	0.0	0.0	0.0	0.0	0.0	0.0	0.0	0.0	0.0	0.0	43.0	14.0	0.0	9.0	0.0	0.0	28.0	0.0	0.0	0.0
f7afa6b80d109422a45a111b29d9970f	k__Bacteria; p__Proteobacteria; c__Betaproteobacteria; o__Burkholderiales; f__Alcaligenaceae; g__Sutterella; s__	0.0	36.0	0.0	0.0	0.0	0.0	0.0	0.0	0.0	0.0	0.0	0.0	0.0	19.0	0.0	0.0	32.0	0.0	0.0	0.0	0.0	0.0	0.0	0.0	0.0	0.0	0.0	0.0	0.0	0.0	0.0	0.0	0.0	0.0	0.0	0.0	0.0	0.0	0.0	0.0	0.0	0.0	0.0	0.0	0.0	0.0	0.0	0.0
1c40dcdf1b798a0efc1be0c68abe4751	k__Bacteria; p__Bacteroidetes; c__Bacteroidia; o__Bacteroidales; f__Bacteroidaceae; g__Bacteroides; s__	0.0	0.0	0.0	0.0	0.0	0.0	0.0	0.0	0.0	0.0	0.0	0.0	0.0	25.0	0.0	0.0	0.0	0.0	0.0	0.0	0.0	19.0	0.0	0.0	0.0	0.0	0.0	0.0	0.0	0.0	0.0	0.0	0.0	0.0	0.0	13.0	0.0	0.0	31.0	0.0	0.0	0.0	0.0	0.0	0.0	0.0	0.0	0.0
0f9b6d16a6121e741529aa1fae413565	k__Bacteria; p__Bacteroidetes; c__Bacteroidia; o__Bacteroidales; f__Bacteroidaceae; g__Bacteroides; s__fragilis	0.0	0.0	0.0	0.0	0.0	0.0	0.0	0.0	0.0	0.0	0.0	26.0	0.0	0.0	0.0	0.0	0.0	0.0	0.0	0.0	44.0	0.0	87.0	0.0	0.0	0.0	0.0	18.0	0.0	0.0	51.0	0.0	0.0	0.0	0.0	0.0	0.0	0.0	0.0	0.0	0.0	0.0	0.0	0.0	0.0	0.0	0.0	0.0
c14072fba92fa11d054a97bc21d99b91	k__Bacteria; p__Bacteroidetes; c__Bacteroidia; o__Bacteroidales; f__Rikenellaceae; g__Alistipes; s__massiliensis	0.0	0.0	0.0	0.0	0.0	0.0	0.0	33.0	0.0	0.0	0.0	59.0	0.0	0.0	0.0	0.0	0.0	0.0	0.0	0.0	0.0	0.0	0.0	0.0	0.0	46.0	0.0	0.0	0.0	0.0	0.0	0.0	0.0	0.0	0.0	0.0	0.0	0.0	0.0	0.0	30.0	0.0	22.0	0.0	0.0	0.0	41.0	0.0
a515a026efac9a5709a3b5c672897201	k__Bacteria; p__Bacteroidetes; c__Bacteroidia; o__Bacteroidales; f__[Odoribacteraceae]; g__Odoribacter; s__	11.0	11.0	0.0	0.0	34.0	11.0	0.0	4.0	9.0	0.0	6.0	40.0	0.0	18.0	0.0	55.0	0.0	45.0	26.0	35.0	0.0	36.0	0.0	0.0	37.0	79.0	29.0	0.0	8.0	0.0	0.0	17.0	18.0	18.0	187.0	13.0	45.0	44.0	0.0	0.0	0.0	11.0	23.0	0.0	64.0	21.0	10.0	0.0
29d26b730d067d916816347ccfc5b18d	k__Bacteria; p__Bacteroidetes; c__Bacteroidia; o__Bacteroidales; f__Bacteroidaceae; g__Bacteroides; s__	17.0	705.0	19.0	0.0	65.0	177.0	0.0	64.0	33.0	269.0	22.0	64.0	0.0	0.0	59.0	0.0	10.0	20.0	0.0	229.0	0.0	0.0	472.0	0.0	0.0	3.0	0.0	11.0	50.0	248.0	137.0	204.0	63.0	21.0	0.0	408.0	250.0	575.0	102.0	220.0	0.0	173.0	1.0	12.0	187.0	23.0	208.0	2832.0
80f6c1f217346ec3208a0b5d82853d08	k__Bacteria; p__Firmicutes; c__Clostridia; o__Clostridiales; f__Lachnospiraceae	0.0	0.0	0.0	0.0	0.0	0.0	0.0	0.0	0.0	0.0	0.0	0.0	0.0	37.0	0.0	0.0	0.0	0.0	0.0	0.0	0.0	0.0	0.0	44.0	0.0	0.0	36.0	0.0	0.0	0.0	0.0	0.0	0.0	0.0	18.0	0.0	0.0	0.0	0.0	0.0	0.0	0.0	0.0	0.0	0.0	0.0	0.0	32.0
97a9ca5fb3ed38afb53ac97d474d63a3	k__Bacteria; p__Firmicutes; c__Clostridia; o__Clostridiales; f__Ruminococcaceae; g__Faecalibacterium; s__prausnitzii	0.0	47.0	0.0	0.0	0.0	28.0	100.0	112.0	160.0	95.0	21.0	46.0	42.0	36.0	37.0	38.0	27.0	85.0	0.0	36.0	0.0	17.0	25.0	30.0	52.0	36.0	0.0	90.0	17.0	17.0	165.0	18.0	0.0	31.0	193.0	72.0	12.0	23.0	27.0	8.0	17.0	28.0	18.0	29.0	0.0	83.0	0.0	46.0
4f6d83350afb1d5091ccb8d9279f578f	k__Bacteria; p__Bacteroidetes; c__Bacteroidia; o__Bacteroidales; f__Bacteroidaceae; g__Bacteroides; s__uniformis	21.0	0.0	0.0	0.0	0.0	0.0	0.0	0.0	0.0	0.0	0.0	0.0	35.0	0.0	0.0	0.0	0.0	0.0	0.0	0.0	0.0	0.0	0.0	0.0	0.0	120.0	120.0	46.0	0.0	0.0	0.0	0.0	0.0	0.0	275.0	0.0	0.0	0.0	0.0	0.0	22.0	0.0	0.0	31.0	0.0	0.0	0.0	39.0
77c7cc24decfccb6bbc6c7ca34148827	k__Bacteria; p__Firmicutes; c__Clostridia; o__Clostridiales; f__Peptostreptococcaceae	0.0	0.0	10.0	0.0	60.0	0.0	0.0	6.0	0.0	0.0	0.0	0.0	0.0	0.0	0.0	0.0	0.0	0.0	0.0	0.0	0.0	0.0	0.0	0.0	0.0	0.0	0.0	0.0	0.0	0.0	0.0	0.0	0.0	0.0	16.0	0.0	0.0	0.0	0.0	0.0	43.0	0.0	0.0	0.0	0.0	0.0	0.0	0.0
bfe07a76bc0eb110527eff3adb536d82	k__Bacteria; p__Bacteroidetes; c__Bacteroidia; o__Bacteroidales; f__Bacteroidaceae; g__Bacteroides	0.0	30.0	0.0	0.0	0.0	0.0	0.0	0.0	0.0	0.0	0.0	0.0	0.0	0.0	0.0	31.0	31.0	0.0	0.0	0.0	0.0	0.0	0.0	0.0	0.0	0.0	0.0	0.0	0.0	0.0	0.0	9.0	0.0	0.0	0.0	52.0	447.0	0.0	0.0	156.0	0.0	0.0	0.0	30.0	0.0	0.0	0.0	0.0
9db11c348796feab0f5fd6dcc7e6dfc5	k__Bacteria; p__Proteobacteria; c__Alphaproteobacteria; o__RF32; f__; g__; s__	0.0	100.0	0.0	0.0	0.0	0.0	0.0	0.0	0.0	0.0	0.0	35.0	0.0	0.0	0.0	53.0	0.0	0.0	0.0	0.0	0.0	469.0	0.0	0.0	15.0	60.0	0.0	0.0	0.0	0.0	0.0	0.0	0.0	0.0	41.0	141.0	0.0	0.0	85.0	0.0	0.0	0.0	0.0	0.0	0.0	0.0	0.0	0.0
95d8eca623f67279a90f34608441b7c9	k__Bacteria; p__Firmicutes; c__Clostridia; o__Clostridiales; f__; g__; s__	0.0	0.0	0.0	0.0	0.0	20.0	0.0	0.0	0.0	0.0	0.0	0.0	0.0	0.0	0.0	0.0	0.0	41.0	0.0	0.0	0.0	0.0	0.0	0.0	0.0	0.0	0.0	0.0	0.0	0.0	0.0	0.0	0.0	0.0	0.0	0.0	21.0	0.0	0.0	0.0	0.0	0.0	0.0	0.0	0.0	0.0	0.0	0.0
b2f8632176e83af3b38661efa93b64e4	k__Bacteria; p__Bacteroidetes; c__Bacteroidia; o__Bacteroidales; f__Bacteroidaceae; g__Bacteroides; s__uniformis	11.0	0.0	109.0	54.0	0.0	36.0	21.0	116.0	0.0	360.0	0.0	291.0	0.0	0.0	57.0	12.0	32.0	0.0	43.0	236.0	0.0	12.0	0.0	0.0	723.0	115.0	141.0	0.0	192.0	0.0	0.0	319.0	0.0	0.0	200.0	248.0	0.0	761.0	0.0	60.0	0.0	0.0	0.0	32.0	0.0	615.0	0.0	66.0
480cc1738d7e78eb42bb60ee840a14a6	k__Bacteria; p__Firmicutes; c__Bacilli; o__Lactobacillales; f__Streptococcaceae; g__Streptococcus; s__	0.0	0.0	31.0	0.0	0.0	39.0	43.0	13.0	145.0	0.0	0.0	0.0	0.0	0.0	34.0	44.0	48.0	0.0	0.0	0.0	47.0	0.0	26.0	0.0	0.0	0.0	0.0	10.0	0.0	0.0	9.0	43.0	0.0	35.0	0.0	0.0	31.0	317.0	0.0	0.0	449.0	27.0	39.0	0.0	21.0	0.0	0.0	157.0
fff43cc8271febad761ba4a57be914f1	k__Bacteria; p__Firmicutes; c__Erysipelotrichi; o__Erysipelotrichales; f__Erysipelotrichaceae; g__[Eubacterium]; s__cylindroides	66.0	0.0	0.0	0.0	0.0	0.0	0.0	127.0	0.0	0.0	35.0	44.0	0.0	0.0	0.0	0.0	0.0	0.0	0.0	0.0	0.0	0.0	0.0	0.0	0.0	0.0	0.0	0.0	240.0	0.0	0.0	0.0	0.0	0.0	0.0	0.0	0.0	0.0	0.0	0.0	0.0	0.0	0.0	0.0	0.0	0.0	0.0	0.0
975d710ec21c5173dace8a4f489192aa	k__Bacteria; p__Bacteroidetes; c__Bacteroidia; o__Bacteroidales; f__Bacteroidaceae; g__Bacteroides; s__	0.0	0.0	0.0	0.0	0.0	0.0	0.0	63.0	0.0	0.0	0.0	0.0	0.0	9.0	0.0	0.0	0.0	0.0	0.0	0.0	0.0	0.0	0.0	387.0	0.0	0.0	0.0	72.0	0.0	0.0	0.0	0.0	0.0	0.0	717.0	0.0	0.0	0.0	42.0	0.0	0.0	0.0	0.0	24.0	0.0	0.0	0.0	0.0
de386a7dc9333bd414fe536c4c6732f4	k__Bacteria; p__Bacteroidetes; c__Bacteroidia; o__Bacteroidales; f__Bacteroidaceae; g__Bacteroides; s__ovatus	0.0	16.0	0.0	16.0	0.0	0.0	26.0	0.0	20.0	0.0	0.0	0.0	0.0	0.0	0.0	0.0	0.0	0.0	36.0	12.0	0.0	0.0	0.0	0.0	0.0	21.0	0.0	0.0	0.0	6.0	0.0	0.0	0.0	0.0	105.0	26.0	21.0	0.0	0.0	0.0	0.0	0.0	55.0	0.0	0.0	3.0	0.0	0.0
5bffb6bd6aa11755277fab706f0decfa	k__Bacteria; p__Firmicutes; c__Clostridia; o__Clostridiales; f__Lachnospiraceae; g__Blautia; s__obeum	39.0	18.0	0.0	0.0	0.0	0.0	0.0	0.0	0.0	0.0	0.0	0.0	0.0	0.0	0.0	0.0	0.0	0.0	0.0	0.0	0.0	0.0	0.0	81.0	0.0	0.0	0.0	0.0	0.0	0.0	42.0	0.0	0.0	0.0	38.0	22.0	23.0	36.0	0.0	0.0	0.0	0.0	0.0	60.0	0.0	0.0	0.0	37.0
04605b2edf4d39adc85c5fb78acfd07d	k__Bacteria; p__Firmicutes; c__Clostridia; o__Clostridiales; f__Lachnospiraceae; g__Dorea; s__formicigenerans	0.0	0.0	0.0	32.0	0.0	8.0	54.0	0.0	0.0	35.0	0.0	0.0	0.0	49.0	39.0	57.0	0.0	0.0	32.0	0.0	29.0	0.0	41.0	39.0	51.0	27.0	0.0	50.0	0.0	0.0	38.0	0.0	0.0	0.0	67.0	37.0	0.0	40.0	0.0	0.0	0.0	0.0	0.0	26.0	67.0	35.0	0.0	42.0
8377b379730acb5287c118fa80a92e71	k__Bacteria; p__Firmicutes; c__Bacilli; o__Lactobacillales; f__Streptococcaceae; g__Streptococcus; s__	0.0	0.0	85.0	11.0	85.0	0.0	0.0	9.0	0.0	0.0	0.0	0.0	0.0	15.0	0.0	0.0	0.0	0.0	40.0	0.0	0.0	21.0	0.0	0.0	0.0	38.0	35.0	402.0	0.0	57.0	48.0	0.0	63.0	0.0	15.0	0.0	0.0	0.0	0.0	33.0	29.0	18.0	0.0	43.0	643.0	0.0	0.0	4.0
2e5b9187e5b5099dcd75238c7a8ce73e	k__Bacteria; p__Firmicutes; c__Clostridia; o__Clostridiales; f__Lachnospiraceae; g__; s__	0.0	65.0	0.0	0.0	0.0	37.0	0.0	0.0	0.0	0.0	0.0	21.0	0.0	0.0	0.0	0.0	0.0	0.0	0.0	63.0	0.0	0.0	0.0	42.0	0.0	0.0	115.0	0.0	0.0	0.0	0.0	0.0	0.0	0.0	0.0	0.0	0.0	0.0	0.0	0.0	0.0	0.0	0.0	0.0	0.0	0.0	0.0	0.0
5e15096fc3c0d7bde1fea01179d99db1	k__Bacteria; p__Firmicutes; c__Clostridia; o__Clostridiales; f__Lachnospiraceae; g__[Ruminococcus]; s__	0.0	0.0	0.0	0.0	36.0	0.0	30.0	0.0	0.0	0.0	0.0	28.0	0.0	0.0	0.0	0.0	0.0	0.0	0.0	0.0	0.0	0.0	0.0	0.0	0.0	0.0	0.0	38.0	0.0	0.0	0.0	0.0	0.0	0.0	43.0	0.0	0.0	0.0	0.0	0.0	0.0	0.0	0.0	0.0	90.0	0.0	0.0	0.0
a5c7dc44eacf3c8bb260eb6464b578b8	k__Bacteria; p__Cyanobacteria; c__4C0d-2; o__YS2; f__; g__; s__	0.0	23.0	0.0	0.0	0.0	0.0	0.0	0.0	0.0	0.0	0.0	34.0	0.0	0.0	0.0	0.0	0.0	0.0	0.0	26.0	28.0	0.0	0.0	0.0	0.0	0.0	0.0	0.0	0.0	0.0	0.0	0.0	0.0	0.0	200.0	32.0	24.0	0.0	0.0	0.0	0.0	0.0	0.0	0.0	0.0	0.0	0.0	0.0
f9625372aa17cc5dec6fa7489d57fa02	k__Bacteria; p__Bacteroidetes; c__Bacteroidia; o__Bacteroidales; f__Rikenellaceae; g__Alistipes; s__finegoldii	0.0	0.0	0.0	0.0	105.0	0.0	0.0	0.0	0.0	0.0	0.0	0.0	7.0	48.0	0.0	54.0	0.0	0.0	0.0	0.0	0.0	21.0	189.0	0.0	0.0	48.0	8.0	0.0	0.0	35.0	0.0	36.0	0.0	0.0	0.0	0.0	0.0	0.0	0.0	0.0	0.0	0.0	0.0	0.0	0.0	0.0	0.0	0.0
4eabd62f2bd1e283cc0d757f52f63a0b	k__Bacteria; p__Firmicutes; c__Bacilli; o__Lactobacillales; f__Streptococcaceae; g__Streptococcus; s__luteciae	0.0	0.0	0.0	0.0	0.0	0.0	0.0	0.0	0.0	0.0	0.0	0.0	0.0	27.0	0.0	0.0	0.0	0.0	0.0	0.0	0.0	0.0	0.0	0.0	0.0	0.0	0.0	0.0	0.0	0.0	0.0	0.0	0.0	0.0	0.0	0.0	0.0	0.0	0.0	0.0	18.0	150.0	0.0	0.0	0.0	0.0	0.0	43.0
545d5ddba815fec113bc97c5d4d0d6a5	k__Bacteria; p__Bacteroidetes; c__Bacteroidia; o__Bacteroidales; f__Bacteroidaceae; g__Bacteroides; s__	0.0	25.0	0.0	0.0	0.0	0.0	0.0	0.0	0.0	0.0	7.0	0.0	0.0	0.0	109.0	46.0	23.0	0.0	21.0	0.0	0.0	0.0	0.0	0.0	0.0	0.0	0.0	0.0	0.0	0.0	0.0	0.0	101.0	0.0	0.0	0.0	0.0	0.0	20.0	0.0	0.0	8.0	0.0	0.0	76.0	0.0	0.0	0.0
1505d5e8f0ac9a796e8522b929a3657f	k__Bacteria; p__Bacteroidetes; c__Bacteroidia; o__Bacteroidales; f__Prevotellaceae; g__Prevotella; s__	0.0	0.0	11.0	0.0	0.0	0.0	0.0	44.0	0.0	0.0	0.0	0.0	0.0	0.0	0.0	0.0	0.0	0.0	0.0	0.0	0.0	0.0	0.0	0.0	0.0	0.0	0.0	0.0	0.0	0.0	0.0	0.0	0.0	0.0	0.0	0.0	0.0	0.0	96.0	0.0	0.0	0.0	52.0	0.0	0.0	0.0	0.0	0.0
74404730546cc81d3ee4986a5d9a75b0	k__Bacteria; p__Bacteroidetes; c__Bacteroidia; o__Bacteroidales; f__[Paraprevotellaceae]; g__Paraprevotella; s__	0.0	0.0	0.0	0.0	0.0	0.0	0.0	0.0	0.0	0.0	0.0	28.0	0.0	0.0	27.0	0.0	0.0	0.0	0.0	0.0	0.0	24.0	0.0	77.0	0.0	50.0	0.0	0.0	0.0	0.0	0.0	0.0	0.0	0.0	0.0	291.0	276.0	34.0	0.0	0.0	0.0	0.0	0.0	0.0	0.0	0.0	0.0	0.0
3362ed163c46b7c575a602d52a71cbd2	k__Bacteria; p__Firmicutes; c__Clostridia; o__Clostridiales	0.0	31.0	0.0	0.0	35.0	4.0	46.0	138.0	0.0	29.0	14.0	0.0	0.0	60.0	64.0	0.0	48.0	18.0	91.0	81.0	0.0	0.0	0.0	0.0	66.0	58.0	0.0	50.0	67.0	0.0	37.0	0.0	34.0	0.0	137.0	0.0	61.0	118.0	0.0	0.0	35.0	32.0	60.0	42.0	0.0	0.0	26.0	67.0
172897397c52d82a91bab284b3b8a667	k__Bacteria; p__Bacteroidetes; c__Bacteroidia; o__Bacteroidales; f__[Paraprevotellaceae]; g__Paraprevotella; s__	0.0	0.0	0.0	0.0	0.0	19.0	0.0	0.0	0.0	0.0	0.0	102.0	0.0	0.0	0.0	0.0	0.0	0.0	0.0	0.0	0.0	0.0	0.0	0.0	0.0	0.0	0.0	0.0	0.0	0.0	0.0	0.0	0.0	0.0	0.0	0.0	0.0	0.0	0.0	0.0	9.0	0.0	0.0	47.0	0.0	0.0	0.0	0.0
a74dc63feb8889d47f060556fd9f3e59	k__Bacteria; p__Firmicutes; c__Clostridia; o__Clostridiales; f__Lachnospiraceae; g__Lachnospira; s__	0.0	0.0	0.0	0.0	0.0	0.0	0.0	0.0	0.0	0.0	0.0	0.0	0.0	0.0	0.0	0.0	0.0	18.0	0.0	0.0	0.0	8.0	0.0	0.0	0.0	0.0	13.0	0.0	0.0	0.0	0.0	0.0	0.0	0.0	0.0	0.0	0.0	0.0	0.0	0.0	0.0	0.0	23.0	0.0	0.0	0.0	0.0	0.0
2c829438503d4ef3cd950f6ba4b3701c	k__Bacteria; p__Firmicutes; c__Clostridia; o__Clostridiales; f__Ruminococcaceae; g__Ruminococcus; s__bromii	0.0	23.0	0.0	0.0	0.0	14.0	0.0	0.0	93.0	0.0	0.0	43.0	0.0	0.0	0.0	45.0	22.0	0.0	8.0	0.0	0.0	0.0	0.0	0.0	0.0	0.0	0.0	0.0	40.0	31.0	0.0	0.0	0.0	33.0	297.0	25.0	9.0	0.0	0.0	0.0	0.0	0.0	0.0	0.0	43.0	42.0	0.0	1146.0
3305ff7b7d62ea57537c6c8f42b31c0b	k__Bacteria; p__Proteobacteria; c__Betaproteobacteria; o__Burkholderiales; f__Alcaligenaceae; g__Sutterella; s__	21.0	0.0	0.0	0.0	0.0	0.0	0.0	0.0	23.0	8.0	0.0	0.0	0.0	0.0	0.0	0.0	7.0	0.0	0.0	92.0	736.0	0.0	0.0	23.0	48.0	270.0	0.0	0.0	0.0	0.0	0.0	0.0	0.0	0.0	10.0	10.0	0.0	16.0	0.0	0.0	0.0	0.0	0.0	3.0	0.0	18.0	0.0	0.0
03ecff4e2fce914e89221491f7c7ab68	k__Bacteria; p__Firmicutes; c__Clostridia; o__Clostridiales; f__Ruminococcaceae; g__Anaerotruncus; s__	0.0	0.0	0.0	0.0	57.0	0.0	0.0	0.0	0.0	0.0	0.0	0.0	0.0	0.0	0.0	0.0	6.0	0.0	0.0	0.0	0.0	0.0	0.0	0.0	0.0	0.0	0.0	0.0	0.0	0.0	0.0	0.0	0.0	0.0	0.0	0.0	0.0	0.0	0.0	0.0	0.0	0.0	0.0	0.0	0.0	0.0	0.0	0.0
d314e9c3f562428df3496d555c6a7d05	k__Bacteria; p__Firmicutes; c__Clostridia; o__Clostridiales; f__Ruminococcaceae	0.0	0.0	0.0	0.0	0.0	0.0	0.0	0.0	0.0	0.0	0.0	0.0	0.0	0.0	0.0	0.0	0.0	0.0	0.0	0.0	0.0	0.0	56.0	0.0	0.0	68.0	0.0	0.0	0.0	23.0	0.0	0.0	0.0	0.0	27.0	0.0	0.0	0.0	25.0	0.0	0.0	0.0	0.0	0.0	0.0	0.0	0.0	0.0
13555444e8255a28b32266fb273c0484	k__Bacteria; p__Firmicutes; c__Clostridia; o__Clostridiales; f__Ruminococcaceae; g__Oscillospira; s__	23.0	85.0	0.0	0.0	0.0	115.0	0.0	54.0	0.0	0.0	26.0	64.0	47.0	0.0	0.0	45.0	165.0	23.0	0.0	0.0	0.0	0.0	0.0	0.0	0.0	0.0	0.0	0.0	65.0	0.0	0.0	85.0	87.0	0.0	0.0	264.0	0.0	31.0	0.0	0.0	0.0	151.0	14.0	0.0	30.0	0.0	49.0	0.0
c3bf75364da1ab1f8f18670b170c182a	k__Bacteria; p__Firmicutes; c__Clostridia; o__Clostridiales; f__Lachnospiraceae	32.0	66.0	0.0	46.0	0.0	30.0	52.0	45.0	97.0	55.0	71.0	59.0	45.0	31.0	29.0	44.0	37.0	0.0	40.0	0.0	49.0	46.0	58.0	47.0	36.0	62.0	49.0	39.0	30.0	34.0	62.0	36.0	86.0	16.0	239.0	37.0	54.0	51.0	49.0	68.0	21.0	58.0	38.0	35.0	0.0	35.0	0.0	42.0
36d47e1680506a3d0e3a2c6febc700b6	k__Bacteria; p__Firmicutes; c__Clostridia; o__Clostridiales; f__Ruminococcaceae; g__; s__	0.0	0.0	0.0	0.0	0.0	0.0	0.0	0.0	0.0	0.0	19.0	70.0	33.0	0.0	0.0	0.0	0.0	0.0	0.0	0.0	0.0	0.0	0.0	0.0	0.0	0.0	37.0	0.0	0.0	0.0	0.0	0.0	0.0	34.0	0.0	38.0	0.0	0.0	0.0	0.0	0.0	0.0	0.0	0.0	0.0	0.0	46.0	0.0
80005a065e8c157b38e57e7cd296c544	k__Bacteria; p__Firmicutes; c__Clostridia; o__Clostridiales; f__Veillonellaceae; g__Acidaminococcus; s__	0.0	0.0	0.0	0.0	0.0	0.0	0.0	108.0	0.0	127.0	0.0	0.0	0.0	30.0	42.0	0.0	0.0	0.0	0.0	0.0	0.0	0.0	0.0	0.0	0.0	0.0	0.0	0.0	0.0	0.0	0.0	0.0	0.0	0.0	0.0	0.0	0.0	0.0	0.0	0.0	0.0	0.0	0.0	0.0	48.0	0.0	0.0	0.0
a16c29b50e7df7a85ebb7a9c6778e0ae	k__Bacteria; p__Firmicutes; c__Clostridia; o__Clostridiales; f__[Mogibacteriaceae]; g__; s__	0.0	0.0	0.0	0.0	0.0	24.0	0.0	0.0	0.0	0.0	0.0	0.0	0.0	50.0	0.0	0.0	0.0	0.0	0.0	0.0	0.0	0.0	0.0	0.0	0.0	0.0	0.0	0.0	0.0	0.0	0.0	0.0	0.0	0.0	31.0	0.0	0.0	14.0	0.0	0.0	0.0	0.0	18.0	0.0	0.0	10.0	0.0	0.0
846a74b4853384f181dfdf37d1532fd4	k__Bacteria; p__Firmicutes; c__Clostridia; o__Clostridiales; f__Ruminococcaceae	0.0	0.0	0.0	0.0	0.0	44.0	0.0	0.0	0.0	0.0	0.0	0.0	0.0	0.0	0.0	0.0	0.0	0.0	0.0	0.0	0.0	0.0	0.0	0.0	0.0	39.0	0.0	0.0	0.0	0.0	0.0	0.0	0.0	0.0	72.0	51.0	0.0	0.0	0.0	0.0	0.0	0.0	0.0	0.0	0.0	0.0	0.0	0.0
049f0665a9addb1ad4fd89fe9bedee10	k__Bacteria; p__Firmicutes; c__Clostridia; o__Clostridiales; f__Lachnospiraceae; g__Blautia; s__	0.0	0.0	0.0	0.0	0.0	0.0	0.0	0.0	0.0	0.0	0.0	0.0	0.0	0.0	0.0	0.0	0.0	0.0	0.0	0.0	0.0	0.0	0.0	0.0	0.0	0.0	0.0	0.0	6.0	0.0	0.0	0.0	0.0	0.0	36.0	22.0	0.0	0.0	0.0	0.0	0.0	11.0	17.0	0.0	0.0	0.0	0.0	0.0
a862926fa98dc6373fad5d74bf1fbb76	k__Bacteria; p__Firmicutes; c__Clostridia; o__Clostridiales; f__[Mogibacteriaceae]; g__; s__	0.0	0.0	0.0	0.0	26.0	0.0	0.0	0.0	0.0	0.0	0.0	0.0	0.0	0.0	0.0	0.0	0.0	0.0	0.0	0.0	0.0	0.0	0.0	0.0	0.0	0.0	0.0	0.0	0.0	23.0	47.0	0.0	0.0	0.0	0.0	0.0	0.0	0.0	0.0	0.0	0.0	0.0	0.0	0.0	0.0	0.0	0.0	0.0
4a3337054b22bb141721956849e53859	k__Bacteria; p__Firmicutes; c__Erysipelotrichi; o__Erysipelotrichales; f__Erysipelotrichaceae; g__Holdemania; s__	0.0	0.0	0.0	0.0	0.0	0.0	28.0	0.0	0.0	0.0	0.0	0.0	0.0	23.0	0.0	47.0	0.0	0.0	0.0	0.0	0.0	0.0	0.0	0.0	0.0	0.0	0.0	0.0	0.0	0.0	0.0	0.0	0.0	0.0	0.0	0.0	0.0	0.0	0.0	0.0	0.0	0.0	0.0	0.0	0.0	0.0	0.0	0.0
5667bf30337e5349c7c90658d84746c9	k__Bacteria; p__Proteobacteria; c__Alphaproteobacteria; o__RF32; f__; g__; s__	0.0	0.0	0.0	0.0	0.0	0.0	0.0	0.0	0.0	0.0	0.0	0.0	0.0	0.0	0.0	0.0	0.0	0.0	0.0	0.0	0.0	0.0	130.0	0.0	0.0	0.0	0.0	0.0	0.0	0.0	0.0	0.0	0.0	0.0	0.0	0.0	0.0	0.0	42.0	0.0	0.0	34.0	0.0	0.0	0.0	0.0	0.0	0.0
4f86c1865d4fabca5d16635bb58736e6	k__Bacteria; p__Firmicutes; c__Erysipelotrichi; o__Erysipelotrichales; f__Erysipelotrichaceae; g__; s__	0.0	0.0	0.0	0.0	10.0	0.0	0.0	0.0	0.0	0.0	0.0	0.0	0.0	0.0	0.0	0.0	0.0	0.0	0.0	0.0	0.0	0.0	0.0	8.0	18.0	0.0	0.0	0.0	0.0	0.0	0.0	0.0	0.0	0.0	0.0	0.0	0.0	24.0	0.0	0.0	0.0	0.0	0.0	0.0	0.0	0.0	0.0	48.0
ef9f510024abbdb74f3593c413181e8a	k__Bacteria; p__Bacteroidetes; c__Bacteroidia; o__Bacteroidales; f__Bacteroidaceae; g__Bacteroides; s__	0.0	0.0	0.0	0.0	18.0	0.0	0.0	257.0	0.0	0.0	0.0	0.0	18.0	21.0	0.0	0.0	0.0	0.0	0.0	0.0	0.0	0.0	0.0	1207.0	0.0	0.0	0.0	225.0	0.0	0.0	0.0	0.0	0.0	0.0	1559.0	0.0	0.0	0.0	53.0	0.0	0.0	0.0	0.0	55.0	0.0	0.0	0.0	0.0
f9b091bf7c274b55493ca9636ef045e5	k__Bacteria; p__Firmicutes; c__Clostridia; o__Clostridiales; f__Ruminococcaceae; g__Oscillospira; s__	0.0	0.0	0.0	0.0	56.0	0.0	0.0	0.0	0.0	0.0	0.0	0.0	0.0	0.0	0.0	0.0	0.0	0.0	0.0	0.0	0.0	0.0	0.0	0.0	0.0	20.0	0.0	0.0	0.0	0.0	43.0	0.0	0.0	0.0	0.0	0.0	11.0	0.0	0.0	0.0	0.0	24.0	0.0	0.0	0.0	58.0	30.0	0.0
1e42758169ae00a4c6cebe34c9e63bff	k__Bacteria; p__Firmicutes; c__Clostridia; o__Clostridiales; f__Lachnospiraceae; g__Blautia; s__	0.0	0.0	0.0	0.0	0.0	26.0	0.0	0.0	0.0	0.0	0.0	65.0	0.0	0.0	0.0	0.0	0.0	33.0	0.0	0.0	0.0	0.0	0.0	24.0	0.0	0.0	18.0	0.0	0.0	75.0	32.0	0.0	0.0	0.0	21.0	43.0	50.0	0.0	0.0	0.0	0.0	0.0	0.0	0.0	52.0	36.0	0.0	38.0
cf785cbd5889ca1a0d040ca10152286a	k__Bacteria; p__Firmicutes; c__Clostridia; o__Clostridiales; f__Lachnospiraceae	0.0	0.0	0.0	0.0	0.0	0.0	0.0	0.0	0.0	0.0	0.0	0.0	0.0	0.0	0.0	0.0	0.0	0.0	0.0	0.0	0.0	0.0	0.0	19.0	0.0	0.0	0.0	0.0	0.0	0.0	0.0	0.0	0.0	0.0	43.0	0.0	0.0	23.0	0.0	0.0	0.0	0.0	0.0	0.0	0.0	0.0	0.0	0.0
0551276559b984f6884944ebac53847b	k__Bacteria; p__Firmicutes; c__Clostridia; o__Clostridiales; f__Ruminococcaceae	0.0	44.0	0.0	0.0	76.0	0.0	0.0	0.0	0.0	20.0	61.0	83.0	0.0	0.0	0.0	0.0	0.0	39.0	0.0	0.0	0.0	0.0	0.0	0.0	0.0	0.0	0.0	0.0	0.0	77.0	47.0	0.0	68.0	0.0	0.0	0.0	0.0	0.0	0.0	0.0	0.0	0.0	0.0	0.0	0.0	0.0	0.0	0.0
36cc4ba7af05f3036a31fc7bd89608e7	k__Bacteria; p__Proteobacteria; c__Betaproteobacteria; o__Burkholderiales; f__Alcaligenaceae; g__Sutterella; s__	0.0	0.0	0.0	0.0	0.0	0.0	0.0	0.0	0.0	0.0	0.0	0.0	0.0	0.0	0.0	0.0	0.0	0.0	0.0	14.0	0.0	0.0	0.0	0.0	106.0	0.0	0.0	0.0	0.0	0.0	121.0	0.0	0.0	0.0	0.0	0.0	0.0	0.0	0.0	0.0	0.0	0.0	0.0	0.0	0.0	51.0	0.0	0.0
212cd517aefb1ebf80dc7dc1443b9a74	k__Bacteria; p__Bacteroidetes; c__Bacteroidia; o__Bacteroidales; f__Bacteroidaceae; g__Bacteroides; s__	0.0	0.0	0.0	0.0	0.0	0.0	0.0	221.0	0.0	0.0	0.0	0.0	8.0	8.0	0.0	0.0	0.0	0.0	0.0	0.0	0.0	0.0	0.0	828.0	0.0	0.0	0.0	157.0	0.0	0.0	0.0	0.0	0.0	0.0	1532.0	0.0	0.0	0.0	56.0	0.0	0.0	0.0	0.0	38.0	0.0	0.0	0.0	0.0
51bdb6b573b4f36aa1fdd68d0320c09c	k__Bacteria; p__Bacteroidetes; c__Bacteroidia; o__Bacteroidales; f__[Paraprevotellaceae]; g__Paraprevotella; s__	0.0	0.0	0.0	0.0	0.0	0.0	0.0	0.0	0.0	0.0	0.0	12.0	0.0	0.0	27.0	0.0	0.0	0.0	0.0	0.0	0.0	0.0	0.0	93.0	0.0	36.0	0.0	0.0	0.0	0.0	0.0	0.0	0.0	0.0	0.0	345.0	322.0	42.0	0.0	0.0	0.0	0.0	0.0	0.0	0.0	0.0	0.0	0.0
34d63e6b965f9580f16047b0dd59124a	k__Bacteria; p__Firmicutes; c__Clostridia; o__Clostridiales; f__Lachnospiraceae; g__Blautia; s__	0.0	0.0	0.0	76.0	0.0	12.0	64.0	15.0	0.0	28.0	22.0	33.0	53.0	22.0	20.0	42.0	71.0	58.0	49.0	0.0	0.0	57.0	0.0	58.0	61.0	141.0	52.0	50.0	74.0	50.0	44.0	38.0	0.0	0.0	108.0	15.0	42.0	59.0	11.0	78.0	95.0	17.0	28.0	46.0	65.0	67.0	0.0	60.0
8915e95afedbadc7bdb7500939dbb9a3	k__Bacteria; p__Firmicutes; c__Clostridia; o__Clostridiales; f__Ruminococcaceae; g__Oscillospira; s__	0.0	0.0	0.0	0.0	0.0	0.0	0.0	0.0	0.0	0.0	0.0	0.0	0.0	0.0	0.0	0.0	0.0	0.0	12.0	0.0	0.0	0.0	7.0	0.0	0.0	0.0	41.0	0.0	0.0	0.0	0.0	0.0	0.0	0.0	0.0	0.0	0.0	56.0	0.0	0.0	3.0	0.0	0.0	0.0	0.0	12.0	0.0	0.0
912e9c551b39b7bb7c0ea567e02f5f2b	k__Bacteria; p__Firmicutes; c__Clostridia; o__Clostridiales; f__Lachnospiraceae	0.0	0.0	0.0	0.0	0.0	0.0	0.0	0.0	0.0	0.0	0.0	61.0	0.0	0.0	0.0	0.0	0.0	0.0	0.0	0.0	0.0	0.0	0.0	0.0	0.0	0.0	38.0	0.0	0.0	0.0	0.0	0.0	0.0	0.0	58.0	0.0	0.0	0.0	0.0	0.0	0.0	42.0	0.0	0.0	0.0	0.0	0.0	0.0
d15470703056a9424ca166b4fe6269b6	k__Bacteria; p__Bacteroidetes; c__Bacteroidia; o__Bacteroidales; f__Bacteroidaceae; g__Bacteroides; s__caccae	0.0	26.0	0.0	103.0	0.0	0.0	0.0	0.0	0.0	54.0	0.0	0.0	0.0	0.0	0.0	0.0	0.0	0.0	0.0	0.0	0.0	0.0	0.0	0.0	0.0	0.0	0.0	0.0	0.0	0.0	0.0	0.0	244.0	0.0	71.0	194.0	0.0	0.0	0.0	255.0	0.0	0.0	0.0	26.0	0.0	0.0	34.0	0.0
25b719b0ac27753f74c768e3bd8f71f1	k__Bacteria; p__Firmicutes; c__Clostridia; o__Clostridiales; f__Lachnospiraceae; g__[Ruminococcus]; s__	0.0	35.0	0.0	0.0	20.0	56.0	0.0	50.0	0.0	55.0	0.0	0.0	0.0	0.0	0.0	37.0	0.0	31.0	0.0	0.0	0.0	0.0	0.0	0.0	15.0	0.0	68.0	44.0	0.0	0.0	0.0	0.0	0.0	0.0	60.0	0.0	0.0	31.0	0.0	0.0	0.0	0.0	0.0	0.0	0.0	0.0	0.0	94.0
c8514877d863af7d99f0bb4b62fa1009	k__Bacteria; p__Firmicutes; c__Clostridia; o__Clostridiales	0.0	0.0	0.0	0.0	0.0	0.0	0.0	0.0	0.0	0.0	48.0	27.0	42.0	0.0	0.0	0.0	0.0	0.0	0.0	0.0	0.0	0.0	0.0	0.0	0.0	0.0	0.0	0.0	37.0	0.0	0.0	40.0	0.0	0.0	0.0	0.0	0.0	0.0	0.0	0.0	0.0	0.0	0.0	0.0	0.0	0.0	0.0	0.0
9ee985750f557cf7d739c9822c6a4b35	k__Bacteria; p__Actinobacteria; c__Coriobacteriia; o__Coriobacteriales; f__Coriobacteriaceae; g__Slackia; s__	0.0	0.0	0.0	0.0	0.0	0.0	0.0	0.0	0.0	0.0	51.0	0.0	35.0	55.0	0.0	0.0	0.0	0.0	0.0	0.0	0.0	0.0	0.0	0.0	0.0	0.0	0.0	0.0	0.0	0.0	0.0	0.0	30.0	0.0	0.0	15.0	0.0	0.0	0.0	0.0	39.0	47.0	0.0	0.0	0.0	0.0	0.0	56.0
eae88a0d1529ccacef83e15eaa463d08	k__Bacteria; p__Firmicutes; c__Clostridia; o__Clostridiales; f__Ruminococcaceae; g__; s__	0.0	0.0	0.0	0.0	0.0	0.0	0.0	0.0	0.0	0.0	0.0	0.0	8.0	13.0	0.0	0.0	0.0	0.0	0.0	0.0	0.0	0.0	0.0	0.0	63.0	0.0	0.0	0.0	0.0	0.0	0.0	0.0	0.0	0.0	35.0	31.0	0.0	0.0	0.0	0.0	0.0	0.0	0.0	0.0	0.0	0.0	0.0	0.0
15e8ee3b4bf73892ba9abb55aee6d065	k__Bacteria; p__Bacteroidetes; c__Bacteroidia; o__Bacteroidales; f__Porphyromonadaceae; g__Parabacteroides; s__distasonis	0.0	0.0	0.0	0.0	0.0	0.0	0.0	0.0	0.0	52.0	0.0	0.0	0.0	0.0	0.0	0.0	0.0	0.0	0.0	0.0	0.0	0.0	0.0	0.0	0.0	0.0	0.0	0.0	0.0	0.0	0.0	0.0	0.0	0.0	0.0	0.0	0.0	0.0	0.0	0.0	0.0	0.0	0.0	0.0	0.0	0.0	119.0	0.0
6cd1407dfe37b3fce450491421ae2b41	k__Bacteria; p__Firmicutes; c__Clostridia; o__Clostridiales; f__Lachnospiraceae; g__Blautia; s__	0.0	0.0	0.0	0.0	0.0	0.0	0.0	0.0	0.0	0.0	0.0	0.0	0.0	0.0	0.0	0.0	0.0	0.0	0.0	0.0	0.0	0.0	0.0	0.0	0.0	0.0	0.0	0.0	0.0	0.0	0.0	0.0	0.0	0.0	11.0	45.0	29.0	0.0	0.0	0.0	0.0	0.0	0.0	0.0	0.0	0.0	0.0	18.0
49f66cab2799e2c0fa824fd7451e9ac2	k__Bacteria; p__Firmicutes; c__Clostridia; o__Clostridiales; f__Lachnospiraceae; g__Roseburia	37.0	0.0	0.0	27.0	0.0	0.0	30.0	0.0	0.0	0.0	0.0	0.0	0.0	28.0	84.0	58.0	33.0	221.0	39.0	48.0	94.0	45.0	61.0	276.0	0.0	199.0	0.0	66.0	71.0	9.0	0.0	0.0	0.0	50.0	223.0	16.0	434.0	62.0	89.0	197.0	78.0	42.0	98.0	18.0	88.0	58.0	109.0	168.0
82641dc18b003fa896e4bbd44d257151	k__Bacteria; p__Bacteroidetes; c__Bacteroidia; o__Bacteroidales; f__[Odoribacteraceae]; g__Butyricimonas; s__	0.0	0.0	0.0	0.0	0.0	0.0	0.0	0.0	0.0	0.0	0.0	32.0	0.0	0.0	0.0	0.0	0.0	0.0	0.0	0.0	0.0	0.0	0.0	0.0	0.0	0.0	0.0	0.0	0.0	0.0	13.0	0.0	0.0	0.0	0.0	47.0	0.0	0.0	0.0	0.0	0.0	0.0	0.0	0.0	0.0	0.0	24.0	0.0
aa196c0f62b0bc5ec9aee1848f1976f7	k__Bacteria; p__Bacteroidetes; c__Bacteroidia; o__Bacteroidales; f__Bacteroidaceae; g__Bacteroides; s__ovatus	0.0	0.0	0.0	10.0	0.0	0.0	0.0	0.0	18.0	0.0	0.0	0.0	0.0	0.0	0.0	0.0	0.0	29.0	0.0	4.0	0.0	0.0	0.0	0.0	0.0	28.0	10.0	0.0	0.0	0.0	0.0	0.0	0.0	0.0	107.0	6.0	20.0	0.0	0.0	0.0	0.0	0.0	26.0	0.0	18.0	0.0	0.0	0.0
523112dd09f33053da8a7ff7a410a880	k__Bacteria; p__Bacteroidetes; c__Bacteroidia; o__Bacteroidales; f__[Barnesiellaceae]; g__; s__	0.0	0.0	0.0	0.0	0.0	0.0	0.0	0.0	0.0	0.0	0.0	0.0	19.0	15.0	0.0	0.0	0.0	0.0	0.0	0.0	0.0	0.0	0.0	0.0	0.0	0.0	0.0	0.0	0.0	0.0	0.0	0.0	0.0	19.0	0.0	8.0	12.0	0.0	0.0	0.0	0.0	0.0	0.0	0.0	0.0	0.0	0.0	0.0
807f3e2bae9ae9698649b6668816f31a	k__Bacteria; p__Bacteroidetes; c__Bacteroidia; o__Bacteroidales; f__[Odoribacteraceae]; g__Butyricimonas; s__	0.0	0.0	0.0	0.0	0.0	25.0	0.0	0.0	0.0	0.0	0.0	15.0	0.0	0.0	0.0	0.0	0.0	0.0	0.0	0.0	0.0	0.0	0.0	0.0	0.0	0.0	0.0	0.0	0.0	0.0	0.0	0.0	0.0	41.0	0.0	29.0	18.0	12.0	0.0	0.0	0.0	0.0	0.0	15.0	0.0	0.0	0.0	23.0
49600500ba1491ff643d35d121e1c07d	k__Bacteria; p__Firmicutes; c__Clostridia; o__Clostridiales; f__Ruminococcaceae; g__Ruminococcus; s__	0.0	0.0	0.0	0.0	0.0	0.0	0.0	0.0	0.0	0.0	0.0	0.0	0.0	0.0	0.0	0.0	0.0	0.0	0.0	0.0	0.0	0.0	0.0	0.0	38.0	0.0	0.0	0.0	0.0	0.0	0.0	0.0	0.0	23.0	0.0	0.0	0.0	33.0	0.0	0.0	0.0	8.0	0.0	0.0	0.0	0.0	0.0	0.0
e6983213f2a9f8d2fec2178e82a46168	k__Bacteria; p__Bacteroidetes; c__Bacteroidia; o__Bacteroidales; f__Bacteroidaceae; g__Bacteroides	0.0	0.0	0.0	0.0	0.0	0.0	0.0	33.0	19.0	39.0	0.0	240.0	32.0	35.0	18.0	45.0	0.0	0.0	99.0	45.0	0.0	0.0	0.0	0.0	62.0	0.0	33.0	0.0	95.0	0.0	229.0	0.0	0.0	14.0	0.0	12.0	305.0	112.0	0.0	394.0	136.0	23.0	168.0	0.0	67.0	0.0	35.0	205.0
4eefe71f18c8e1e5106330f1dbbf6535	k__Bacteria; p__Bacteroidetes; c__Bacteroidia; o__Bacteroidales; f__Porphyromonadaceae; g__Parabacteroides; s__distasonis	0.0	0.0	0.0	0.0	0.0	0.0	0.0	0.0	0.0	0.0	0.0	0.0	0.0	0.0	0.0	0.0	0.0	0.0	0.0	0.0	0.0	0.0	46.0	0.0	0.0	0.0	0.0	0.0	0.0	0.0	41.0	0.0	0.0	0.0	0.0	0.0	0.0	0.0	0.0	0.0	0.0	0.0	0.0	0.0	0.0	0.0	0.0	0.0
63beba49b485bf65bf7d6ac37cc7cb9a	k__Bacteria; p__Bacteroidetes; c__Bacteroidia; o__Bacteroidales; f__Porphyromonadaceae; g__Parabacteroides; s__distasonis	0.0	0.0	0.0	0.0	0.0	0.0	0.0	0.0	36.0	0.0	0.0	0.0	0.0	0.0	0.0	0.0	0.0	0.0	0.0	0.0	0.0	0.0	24.0	0.0	0.0	0.0	0.0	0.0	0.0	0.0	39.0	0.0	0.0	0.0	0.0	0.0	0.0	0.0	0.0	0.0	0.0	0.0	0.0	0.0	0.0	0.0	0.0	0.0
a3600a48f7f3f24cdfcf2baca006c428	k__Bacteria; p__Firmicutes; c__Clostridia; o__Clostridiales; f__Ruminococcaceae; g__Butyricicoccus; s__pullicaecorum	0.0	0.0	0.0	0.0	0.0	0.0	0.0	0.0	0.0	12.0	0.0	0.0	0.0	0.0	0.0	0.0	0.0	0.0	0.0	0.0	0.0	0.0	0.0	28.0	0.0	0.0	0.0	0.0	0.0	0.0	0.0	0.0	0.0	0.0	44.0	0.0	0.0	0.0	0.0	0.0	0.0	0.0	0.0	0.0	0.0	0.0	0.0	67.0
24c5093897f2398f00f55df06a31c767	k__Bacteria; p__Firmicutes; c__Clostridia; o__Clostridiales; f__Ruminococcaceae; g__Oscillospira; s__	0.0	0.0	0.0	0.0	0.0	30.0	0.0	0.0	0.0	0.0	0.0	0.0	0.0	0.0	0.0	0.0	0.0	0.0	0.0	0.0	0.0	0.0	0.0	0.0	0.0	23.0	33.0	0.0	0.0	0.0	0.0	0.0	0.0	0.0	0.0	21.0	56.0	0.0	0.0	0.0	0.0	0.0	0.0	0.0	0.0	0.0	0.0	16.0
7ceb5c8f884ed94047dae8504b8808bf	k__Bacteria; p__Bacteroidetes; c__Bacteroidia; o__Bacteroidales; f__Bacteroidaceae; g__Bacteroides; s__ovatus	0.0	0.0	0.0	0.0	0.0	0.0	0.0	0.0	5.0	0.0	0.0	0.0	0.0	0.0	0.0	0.0	0.0	0.0	41.0	0.0	0.0	0.0	0.0	0.0	0.0	0.0	0.0	0.0	0.0	0.0	0.0	0.0	0.0	0.0	0.0	0.0	0.0	0.0	0.0	0.0	0.0	0.0	0.0	0.0	0.0	0.0	0.0	0.0
ea99d8118f8a58aa4e62dbccca942ffa	k__Bacteria; p__Bacteroidetes; c__Bacteroidia; o__Bacteroidales; f__Bacteroidaceae; g__Bacteroides; s__ovatus	0.0	0.0	0.0	0.0	0.0	0.0	0.0	0.0	15.0	0.0	0.0	0.0	0.0	0.0	0.0	0.0	0.0	0.0	40.0	0.0	0.0	0.0	0.0	0.0	0.0	0.0	0.0	0.0	0.0	0.0	0.0	0.0	0.0	0.0	0.0	0.0	0.0	0.0	0.0	0.0	0.0	0.0	0.0	0.0	0.0	0.0	0.0	0.0
2d23a91f3b49c5cb2f7388028c8f00a7	k__Bacteria; p__Firmicutes; c__Bacilli; o__Turicibacterales; f__Turicibacteraceae; g__Turicibacter; s__	0.0	0.0	0.0	0.0	30.0	0.0	0.0	0.0	18.0	0.0	0.0	0.0	0.0	0.0	0.0	0.0	0.0	52.0	0.0	0.0	0.0	0.0	0.0	0.0	0.0	0.0	0.0	14.0	0.0	0.0	0.0	0.0	0.0	0.0	53.0	0.0	33.0	0.0	0.0	0.0	22.0	0.0	0.0	0.0	0.0	0.0	0.0	23.0
b5d1d4b7480bab6d2fa0e7f64b74c407	k__Bacteria; p__Actinobacteria; c__Coriobacteriia; o__Coriobacteriales; f__Coriobacteriaceae; g__; s__	0.0	0.0	0.0	0.0	0.0	0.0	0.0	0.0	0.0	0.0	0.0	0.0	0.0	0.0	0.0	0.0	0.0	0.0	0.0	0.0	0.0	0.0	0.0	0.0	0.0	0.0	53.0	0.0	0.0	0.0	0.0	0.0	41.0	0.0	0.0	0.0	0.0	134.0	0.0	0.0	0.0	57.0	0.0	0.0	0.0	0.0	0.0	0.0
c4b0154f1dcc5f72a606890718b4fb14	k__Bacteria; p__Firmicutes; c__Clostridia; o__Clostridiales; f__Veillonellaceae; g__Veillonella; s__parvula	0.0	0.0	0.0	0.0	0.0	0.0	61.0	0.0	149.0	0.0	0.0	0.0	0.0	0.0	0.0	0.0	0.0	0.0	0.0	0.0	0.0	0.0	0.0	0.0	0.0	0.0	0.0	0.0	0.0	0.0	0.0	0.0	0.0	0.0	0.0	0.0	0.0	0.0	0.0	0.0	0.0	0.0	29.0	0.0	30.0	0.0	0.0	42.0
3519c81e9427116cb8561765223a1463	k__Bacteria; p__Firmicutes; c__Clostridia; o__Clostridiales; f__Ruminococcaceae; g__; s__	0.0	0.0	0.0	0.0	216.0	0.0	0.0	0.0	0.0	0.0	0.0	0.0	0.0	0.0	0.0	59.0	0.0	0.0	0.0	0.0	0.0	0.0	42.0	0.0	28.0	0.0	0.0	0.0	0.0	0.0	0.0	0.0	0.0	0.0	0.0	0.0	0.0	0.0	0.0	0.0	0.0	0.0	0.0	0.0	0.0	0.0	0.0	0.0
cbd0d9080df3e0755e259bd6754989f1	k__Bacteria; p__Bacteroidetes; c__Bacteroidia; o__Bacteroidales; f__[Odoribacteraceae]; g__Butyricimonas; s__	0.0	0.0	0.0	0.0	51.0	0.0	0.0	0.0	0.0	0.0	0.0	0.0	0.0	0.0	0.0	0.0	0.0	0.0	0.0	0.0	0.0	0.0	0.0	0.0	0.0	0.0	0.0	0.0	0.0	0.0	5.0	0.0	0.0	0.0	0.0	0.0	0.0	45.0	28.0	0.0	0.0	0.0	0.0	0.0	0.0	0.0	0.0	0.0
fa29ac1a20d29aee48479567da59c50c	k__Bacteria; p__Bacteroidetes; c__Bacteroidia; o__Bacteroidales; f__[Odoribacteraceae]; g__Odoribacter; s__	0.0	20.0	0.0	0.0	75.0	40.0	0.0	15.0	18.0	52.0	39.0	3.0	47.0	20.0	45.0	19.0	14.0	0.0	13.0	14.0	0.0	18.0	0.0	0.0	0.0	0.0	12.0	0.0	19.0	0.0	0.0	33.0	28.0	35.0	63.0	32.0	33.0	0.0	38.0	32.0	0.0	30.0	19.0	31.0	7.0	0.0	12.0	0.0
afb8480e00bc62e9033940968db5b0db	k__Bacteria; p__Bacteroidetes; c__Bacteroidia; o__Bacteroidales; f__Rikenellaceae	0.0	0.0	0.0	0.0	0.0	0.0	0.0	0.0	0.0	54.0	0.0	0.0	0.0	37.0	0.0	0.0	0.0	28.0	0.0	0.0	0.0	12.0	100.0	36.0	0.0	0.0	0.0	0.0	0.0	0.0	0.0	0.0	0.0	0.0	0.0	0.0	0.0	0.0	0.0	0.0	0.0	0.0	0.0	0.0	0.0	0.0	0.0	0.0
5f070b891de8ef366e8f2608a4ee6368	k__Bacteria; p__Firmicutes; c__Clostridia; o__Clostridiales; f__Ruminococcaceae; g__Oscillospira; s__	0.0	0.0	0.0	0.0	0.0	0.0	0.0	0.0	0.0	0.0	0.0	0.0	0.0	0.0	0.0	0.0	0.0	33.0	0.0	0.0	0.0	0.0	0.0	0.0	0.0	49.0	0.0	0.0	0.0	0.0	0.0	30.0	0.0	0.0	0.0	0.0	0.0	0.0	0.0	0.0	0.0	0.0	31.0	0.0	33.0	0.0	0.0	13.0
c45d51e2c81a4431a4068c5014a12519	k__Bacteria; p__Firmicutes; c__Clostridia; o__Clostridiales; f__[Mogibacteriaceae]; g__; s__	0.0	0.0	0.0	0.0	0.0	16.0	0.0	0.0	0.0	0.0	0.0	0.0	0.0	0.0	0.0	0.0	0.0	0.0	0.0	0.0	0.0	0.0	0.0	0.0	13.0	0.0	0.0	0.0	0.0	0.0	0.0	0.0	0.0	0.0	11.0	0.0	0.0	0.0	0.0	0.0	0.0	0.0	10.0	0.0	0.0	0.0	0.0	0.0
3fa23c3cc1de86725435fd64ad6602c2	k__Bacteria; p__Firmicutes; c__Clostridia; o__Clostridiales; f__Ruminococcaceae; g__Oscillospira; s__	0.0	43.0	0.0	0.0	0.0	0.0	0.0	0.0	0.0	22.0	0.0	0.0	0.0	0.0	0.0	0.0	32.0	0.0	0.0	0.0	0.0	0.0	70.0	0.0	0.0	0.0	0.0	0.0	0.0	0.0	0.0	38.0	0.0	0.0	52.0	0.0	0.0	0.0	0.0	0.0	0.0	0.0	0.0	0.0	0.0	52.0	0.0	29.0
4877112e5c231ff4a22b0b0cd2d345ac	k__Bacteria; p__Firmicutes; c__Clostridia; o__Clostridiales; f__[Mogibacteriaceae]; g__; s__	0.0	0.0	0.0	0.0	0.0	0.0	0.0	0.0	0.0	74.0	0.0	0.0	0.0	0.0	0.0	0.0	0.0	0.0	0.0	0.0	0.0	0.0	0.0	0.0	0.0	0.0	0.0	0.0	0.0	0.0	0.0	0.0	0.0	0.0	25.0	0.0	50.0	29.0	0.0	0.0	0.0	0.0	0.0	0.0	0.0	0.0	0.0	0.0
9f58ac99cf64cba2020bddc186b830d3	k__Bacteria; p__Firmicutes; c__Clostridia; o__Clostridiales; f__; g__; s__	0.0	0.0	0.0	0.0	0.0	0.0	0.0	0.0	0.0	0.0	31.0	0.0	0.0	0.0	21.0	0.0	0.0	32.0	0.0	0.0	0.0	0.0	0.0	0.0	0.0	0.0	19.0	0.0	0.0	0.0	0.0	0.0	0.0	0.0	16.0	0.0	11.0	0.0	0.0	0.0	0.0	18.0	0.0	0.0	0.0	0.0	0.0	0.0
dc47e75e0b5024d3d9bc2ad35e7db120	k__Bacteria; p__Firmicutes; c__Clostridia; o__Clostridiales; f__Lachnospiraceae; g__Coprococcus; s__	0.0	67.0	0.0	0.0	0.0	0.0	0.0	0.0	31.0	0.0	0.0	0.0	38.0	0.0	0.0	0.0	0.0	0.0	0.0	0.0	0.0	0.0	0.0	0.0	0.0	20.0	25.0	0.0	0.0	0.0	0.0	0.0	0.0	0.0	50.0	24.0	0.0	0.0	0.0	0.0	0.0	0.0	0.0	79.0	0.0	0.0	0.0	0.0
22329153006f40704b31feabcbf08949	k__Bacteria; p__Bacteroidetes; c__Bacteroidia; o__Bacteroidales; f__Bacteroidaceae; g__Bacteroides; s__	44.0	197.0	2.0	0.0	11.0	638.0	16.0	0.0	247.0	7.0	0.0	153.0	8.0	20.0	13.0	0.0	49.0	11.0	65.0	32.0	363.0	90.0	132.0	504.0	0.0	362.0	270.0	185.0	28.0	37.0	550.0	78.0	58.0	144.0	691.0	114.0	121.0	223.0	123.0	287.0	91.0	98.0	181.0	118.0	376.0	21.0	53.0	142.0
04914343e8fafce2a1b02abde1f97a8d	k__Bacteria; p__Firmicutes; c__Clostridia; o__Clostridiales; f__Christensenellaceae; g__; s__	0.0	0.0	0.0	0.0	48.0	34.0	0.0	0.0	0.0	0.0	38.0	34.0	0.0	0.0	0.0	0.0	0.0	0.0	0.0	0.0	0.0	0.0	0.0	0.0	0.0	0.0	39.0	0.0	84.0	0.0	0.0	0.0	32.0	33.0	48.0	49.0	0.0	0.0	0.0	0.0	0.0	48.0	0.0	0.0	0.0	0.0	0.0	0.0
0228892cafa7201d36ae32b8e6ec8cf7	k__Bacteria; p__Firmicutes; c__Clostridia; o__Clostridiales; f__Lachnospiraceae; g__Lachnospira; s__	0.0	0.0	0.0	0.0	0.0	0.0	0.0	0.0	0.0	0.0	0.0	0.0	0.0	0.0	0.0	0.0	0.0	22.0	0.0	0.0	0.0	11.0	0.0	0.0	0.0	0.0	7.0	0.0	0.0	0.0	0.0	0.0	0.0	0.0	0.0	0.0	0.0	0.0	0.0	0.0	0.0	0.0	15.0	0.0	0.0	0.0	0.0	0.0
7d816915e9cce0eee9af746b06d85283	k__Bacteria; p__Firmicutes; c__Clostridia; o__Clostridiales; f__Lachnospiraceae	0.0	0.0	0.0	0.0	0.0	52.0	0.0	0.0	0.0	0.0	0.0	0.0	0.0	0.0	0.0	0.0	0.0	47.0	0.0	45.0	0.0	0.0	0.0	0.0	0.0	0.0	67.0	0.0	0.0	0.0	0.0	0.0	0.0	0.0	0.0	31.0	147.0	0.0	48.0	0.0	0.0	0.0	0.0	0.0	0.0	0.0	0.0	61.0
788ea1c1ed04a723c560ab5e690e294f	k__Bacteria; p__Bacteroidetes; c__Bacteroidia; o__Bacteroidales; f__Bacteroidaceae; g__Bacteroides; s__	4.0	241.0	0.0	0.0	24.0	0.0	0.0	32.0	98.0	5.0	31.0	0.0	5.0	12.0	19.0	0.0	12.0	27.0	258.0	184.0	0.0	0.0	250.0	47.0	0.0	0.0	90.0	14.0	0.0	51.0	178.0	31.0	0.0	24.0	118.0	0.0	399.0	0.0	53.0	104.0	0.0	0.0	0.0	17.0	0.0	0.0	28.0	0.0
7a501e143444d3b2605c6b3ca55a2bd8	k__Bacteria; p__Firmicutes; c__Clostridia; o__Clostridiales; f__Ruminococcaceae; g__Ruminococcus; s__	0.0	16.0	0.0	0.0	0.0	0.0	0.0	0.0	0.0	0.0	0.0	58.0	0.0	0.0	0.0	34.0	0.0	53.0	0.0	0.0	0.0	0.0	0.0	0.0	0.0	0.0	26.0	0.0	0.0	0.0	0.0	0.0	0.0	0.0	0.0	0.0	0.0	0.0	0.0	0.0	0.0	0.0	0.0	0.0	0.0	0.0	0.0	0.0
68461aeca327ad34a95b8551b49552df	k__Bacteria; p__Bacteroidetes; c__Bacteroidia; o__Bacteroidales; f__Bacteroidaceae; g__Bacteroides; s__uniformis	35.0	0.0	0.0	0.0	0.0	0.0	0.0	0.0	0.0	0.0	0.0	0.0	23.0	64.0	0.0	0.0	0.0	0.0	0.0	0.0	0.0	0.0	0.0	0.0	0.0	138.0	106.0	56.0	0.0	0.0	0.0	0.0	0.0	0.0	280.0	0.0	0.0	0.0	0.0	0.0	36.0	0.0	0.0	27.0	0.0	0.0	0.0	40.0
f93f4c534286feec5679ec0ed0209d72	k__Bacteria; p__Firmicutes; c__Clostridia; o__Clostridiales; f__Lachnospiraceae	47.0	29.0	0.0	21.0	0.0	75.0	131.0	56.0	36.0	56.0	45.0	0.0	79.0	37.0	34.0	44.0	59.0	34.0	33.0	0.0	63.0	24.0	69.0	44.0	43.0	54.0	17.0	39.0	47.0	26.0	29.0	86.0	54.0	0.0	101.0	65.0	46.0	46.0	0.0	0.0	0.0	0.0	43.0	76.0	47.0	46.0	31.0	98.0
f8c374c3686732b6e2f837b24c1fbf58	k__Bacteria; p__Firmicutes; c__Clostridia; o__Clostridiales; f__Lachnospiraceae	0.0	0.0	0.0	0.0	0.0	0.0	0.0	0.0	0.0	0.0	0.0	0.0	0.0	0.0	0.0	0.0	0.0	0.0	0.0	0.0	16.0	0.0	0.0	0.0	0.0	0.0	0.0	0.0	0.0	0.0	0.0	0.0	0.0	0.0	0.0	0.0	0.0	0.0	26.0	0.0	0.0	0.0	0.0	0.0	38.0	0.0	0.0	0.0
ae4750e29d8d13dc26870c96b1cbfe7e	k__Bacteria; p__Bacteroidetes; c__Bacteroidia; o__Bacteroidales; f__Porphyromonadaceae; g__Parabacteroides; s__	0.0	0.0	0.0	0.0	0.0	0.0	0.0	0.0	0.0	0.0	0.0	0.0	0.0	0.0	0.0	0.0	0.0	0.0	0.0	0.0	0.0	0.0	0.0	0.0	0.0	59.0	0.0	0.0	0.0	0.0	0.0	0.0	69.0	0.0	0.0	0.0	0.0	0.0	0.0	0.0	0.0	0.0	0.0	29.0	0.0	0.0	0.0	0.0
14b43f24860261ac239ac56285daa64c	k__Bacteria; p__Firmicutes; c__Clostridia; o__Clostridiales; f__Lachnospiraceae; g__; s__	0.0	0.0	0.0	0.0	0.0	0.0	0.0	0.0	0.0	0.0	0.0	0.0	0.0	0.0	18.0	0.0	0.0	0.0	0.0	0.0	0.0	0.0	0.0	29.0	92.0	0.0	0.0	0.0	0.0	0.0	0.0	0.0	0.0	0.0	6.0	12.0	0.0	0.0	0.0	0.0	0.0	0.0	0.0	0.0	0.0	0.0	0.0	0.0
1ef4d1b93594b451719df8145c77b388	k__Bacteria; p__Firmicutes; c__Clostridia; o__Clostridiales; f__Lachnospiraceae; g__Lachnospira; s__	0.0	39.0	0.0	0.0	0.0	53.0	35.0	0.0	0.0	0.0	0.0	0.0	0.0	26.0	178.0	0.0	0.0	35.0	0.0	0.0	75.0	0.0	0.0	0.0	0.0	0.0	25.0	0.0	0.0	0.0	20.0	0.0	0.0	0.0	0.0	0.0	0.0	0.0	71.0	0.0	0.0	0.0	0.0	0.0	38.0	0.0	0.0	0.0
9bc20340cc287855a8ad6178ffe659e7	k__Bacteria; p__Firmicutes; c__Clostridia; o__Clostridiales; f__Lachnospiraceae; g__; s__	0.0	0.0	0.0	0.0	0.0	0.0	0.0	0.0	0.0	0.0	0.0	0.0	0.0	59.0	37.0	0.0	0.0	0.0	0.0	63.0	0.0	0.0	0.0	0.0	0.0	18.0	25.0	0.0	0.0	0.0	17.0	0.0	0.0	0.0	23.0	32.0	0.0	0.0	67.0	0.0	0.0	13.0	0.0	21.0	48.0	0.0	0.0	0.0
4c09be1e9e0404012cf4508231a6582a	k__Bacteria; p__Firmicutes; c__Clostridia; o__Clostridiales; f__Ruminococcaceae; g__Ruminococcus; s__bromii	0.0	0.0	0.0	0.0	0.0	31.0	0.0	675.0	0.0	0.0	0.0	0.0	0.0	0.0	0.0	0.0	0.0	68.0	0.0	0.0	0.0	0.0	0.0	0.0	0.0	0.0	30.0	0.0	0.0	0.0	0.0	0.0	0.0	0.0	836.0	0.0	0.0	0.0	52.0	37.0	0.0	364.0	0.0	0.0	0.0	0.0	0.0	0.0
e15501efbc9eec506086442657bef2f2	k__Bacteria; p__Bacteroidetes; c__Bacteroidia; o__Bacteroidales; f__Bacteroidaceae; g__Bacteroides	0.0	39.0	0.0	5.0	17.0	12.0	0.0	0.0	31.0	39.0	0.0	22.0	0.0	0.0	19.0	0.0	0.0	0.0	0.0	15.0	0.0	74.0	0.0	0.0	48.0	70.0	9.0	13.0	0.0	31.0	9.0	53.0	0.0	32.0	159.0	9.0	74.0	0.0	0.0	0.0	58.0	30.0	38.0	0.0	0.0	42.0	19.0	0.0
aecc62ebb04b51de3290c198d045cf38	k__Bacteria; p__Bacteroidetes; c__Bacteroidia; o__Bacteroidales; f__Bacteroidaceae; g__Bacteroides; s__caccae	27.0	0.0	0.0	0.0	0.0	0.0	0.0	0.0	0.0	0.0	0.0	0.0	0.0	0.0	9.0	0.0	0.0	0.0	0.0	0.0	0.0	0.0	0.0	0.0	0.0	0.0	0.0	0.0	0.0	0.0	0.0	0.0	0.0	0.0	0.0	0.0	0.0	88.0	0.0	0.0	0.0	0.0	0.0	0.0	0.0	0.0	0.0	0.0
d2fc8c6d1ef972caa06a333a5a66f5c9	k__Bacteria; p__Bacteroidetes; c__Bacteroidia; o__Bacteroidales; f__Bacteroidaceae; g__Bacteroides; s__	0.0	0.0	0.0	0.0	0.0	0.0	0.0	0.0	0.0	0.0	0.0	0.0	0.0	33.0	0.0	0.0	0.0	0.0	0.0	0.0	0.0	0.0	0.0	0.0	0.0	0.0	0.0	0.0	0.0	19.0	0.0	0.0	55.0	0.0	0.0	45.0	0.0	1457.0	0.0	0.0	0.0	0.0	0.0	0.0	0.0	0.0	0.0	0.0
8e0dad94cdfdf4b395e274b19966fe0f	k__Bacteria; p__Firmicutes; c__Bacilli; o__Lactobacillales; f__Streptococcaceae; g__Streptococcus; s__	0.0	0.0	0.0	0.0	0.0	0.0	0.0	0.0	19.0	0.0	0.0	0.0	0.0	0.0	0.0	0.0	0.0	0.0	0.0	0.0	0.0	0.0	0.0	0.0	0.0	0.0	0.0	0.0	0.0	0.0	0.0	0.0	0.0	0.0	0.0	0.0	0.0	0.0	0.0	0.0	41.0	0.0	0.0	0.0	0.0	0.0	0.0	20.0
5dfc88a20b22d80d4c478aeefc3ccd61	k__Bacteria; p__Firmicutes; c__Clostridia; o__Clostridiales; f__; g__; s__	0.0	0.0	0.0	0.0	0.0	43.0	0.0	0.0	0.0	0.0	0.0	42.0	0.0	40.0	0.0	0.0	0.0	38.0	0.0	0.0	0.0	0.0	0.0	0.0	0.0	0.0	0.0	0.0	48.0	0.0	0.0	35.0	0.0	0.0	42.0	0.0	41.0	0.0	14.0	14.0	0.0	35.0	0.0	0.0	47.0	0.0	0.0	0.0
61991cdbf76c90d0f6448862d2b6228f	k__Bacteria; p__Firmicutes; c__Clostridia; o__Clostridiales; f__Lachnospiraceae	0.0	0.0	0.0	0.0	0.0	0.0	0.0	0.0	0.0	0.0	0.0	0.0	0.0	0.0	0.0	0.0	0.0	51.0	0.0	0.0	0.0	0.0	0.0	0.0	0.0	0.0	38.0	0.0	0.0	0.0	24.0	0.0	0.0	0.0	0.0	68.0	0.0	0.0	0.0	0.0	0.0	0.0	0.0	0.0	0.0	0.0	0.0	0.0
9dc816007e6fb48ed75c84e36c869b23	k__Bacteria; p__Firmicutes; c__Clostridia; o__Clostridiales; f__Lachnospiraceae; g__; s__	0.0	0.0	0.0	0.0	0.0	0.0	0.0	0.0	0.0	0.0	0.0	0.0	57.0	0.0	0.0	0.0	0.0	0.0	0.0	0.0	0.0	0.0	308.0	0.0	0.0	0.0	0.0	0.0	0.0	0.0	87.0	0.0	0.0	0.0	56.0	0.0	0.0	0.0	0.0	0.0	0.0	0.0	0.0	0.0	0.0	0.0	0.0	0.0
1ca7f6cf03b6d79ccd33e632818bf60d	k__Bacteria; p__Firmicutes; c__Clostridia; o__Clostridiales; f__Lachnospiraceae	0.0	0.0	0.0	0.0	0.0	0.0	0.0	0.0	0.0	0.0	0.0	0.0	0.0	0.0	0.0	56.0	0.0	0.0	0.0	0.0	22.0	0.0	0.0	0.0	0.0	0.0	0.0	0.0	0.0	0.0	0.0	0.0	0.0	0.0	0.0	0.0	0.0	0.0	0.0	0.0	0.0	0.0	0.0	0.0	0.0	0.0	0.0	0.0
f72c0ff792b7b10565ccbd0334b2fc5f	k__Bacteria; p__Firmicutes; c__Clostridia; o__Clostridiales; f__Ruminococcaceae; g__Oscillospira; s__	0.0	0.0	0.0	0.0	0.0	0.0	0.0	0.0	0.0	0.0	0.0	0.0	0.0	0.0	14.0	0.0	39.0	0.0	0.0	21.0	0.0	0.0	0.0	29.0	0.0	0.0	0.0	0.0	82.0	0.0	0.0	0.0	44.0	0.0	0.0	26.0	22.0	0.0	0.0	0.0	0.0	0.0	29.0	0.0	0.0	0.0	0.0	0.0
cdd6df569c20de3a8fe3a57e0ff15d7f	k__Bacteria; p__Actinobacteria; c__Coriobacteriia; o__Coriobacteriales; f__Coriobacteriaceae; g__; s__	0.0	62.0	0.0	0.0	0.0	40.0	51.0	0.0	30.0	0.0	39.0	0.0	0.0	0.0	0.0	65.0	0.0	15.0	0.0	0.0	0.0	29.0	0.0	41.0	0.0	0.0	72.0	0.0	0.0	0.0	0.0	35.0	0.0	0.0	0.0	0.0	0.0	0.0	0.0	0.0	0.0	0.0	0.0	50.0	49.0	0.0	0.0	0.0
b2391a581dc68407bedb1fe9a12b1093	k__Bacteria; p__Firmicutes; c__Clostridia; o__Clostridiales; f__Lachnospiraceae; g__Clostridium; s__lavalense	0.0	0.0	0.0	0.0	0.0	0.0	0.0	0.0	0.0	0.0	0.0	0.0	0.0	0.0	0.0	0.0	0.0	0.0	0.0	0.0	0.0	0.0	0.0	0.0	0.0	0.0	0.0	0.0	0.0	0.0	0.0	0.0	0.0	0.0	0.0	0.0	0.0	0.0	0.0	0.0	0.0	0.0	0.0	0.0	0.0	0.0	0.0	20.0
4b190bfb4fd5e7bd9b7a586b47a95175	k__Bacteria; p__Firmicutes; c__Clostridia; o__Clostridiales; f__Lachnospiraceae; g__; s__	0.0	0.0	0.0	0.0	0.0	43.0	0.0	0.0	0.0	0.0	0.0	0.0	0.0	0.0	0.0	0.0	0.0	0.0	0.0	10.0	0.0	20.0	0.0	0.0	0.0	0.0	0.0	0.0	0.0	0.0	0.0	0.0	0.0	0.0	0.0	0.0	0.0	0.0	0.0	0.0	0.0	0.0	0.0	0.0	0.0	0.0	0.0	0.0
f65fceac3e4dc2f98c4773a85d58a8cb	k__Bacteria; p__Firmicutes; c__Clostridia; o__Clostridiales; f__[Mogibacteriaceae]; g__; s__	0.0	0.0	0.0	0.0	0.0	21.0	56.0	0.0	0.0	0.0	0.0	0.0	0.0	0.0	0.0	0.0	0.0	0.0	57.0	0.0	0.0	0.0	57.0	0.0	0.0	0.0	0.0	0.0	0.0	0.0	32.0	0.0	0.0	0.0	49.0	0.0	14.0	50.0	0.0	0.0	0.0	39.0	30.0	0.0	0.0	28.0	0.0	0.0
f173f96842140381837904996de84b0e	k__Bacteria; p__Firmicutes; c__Clostridia; o__Clostridiales; f__; g__; s__	0.0	0.0	0.0	0.0	0.0	0.0	0.0	0.0	0.0	7.0	0.0	0.0	0.0	0.0	0.0	71.0	0.0	0.0	0.0	0.0	0.0	0.0	0.0	0.0	61.0	0.0	0.0	0.0	0.0	0.0	0.0	0.0	0.0	0.0	0.0	0.0	0.0	0.0	0.0	0.0	0.0	0.0	0.0	0.0	0.0	0.0	0.0	0.0
cdc184ba7ae137ffab04bf8cf7243f79	k__Bacteria; p__Bacteroidetes; c__Bacteroidia; o__Bacteroidales; f__Bacteroidaceae; g__Bacteroides; s__	0.0	18.0	0.0	0.0	0.0	0.0	166.0	0.0	0.0	229.0	0.0	0.0	0.0	0.0	129.0	0.0	0.0	49.0	0.0	0.0	0.0	0.0	0.0	50.0	699.0	0.0	99.0	153.0	90.0	753.0	0.0	21.0	69.0	0.0	117.0	295.0	240.0	43.0	0.0	0.0	0.0	43.0	0.0	25.0	0.0	0.0	0.0	0.0
5b3af8b78509ee67c84a9d503e512755	k__Bacteria; p__Firmicutes; c__Erysipelotrichi; o__Erysipelotrichales; f__Erysipelotrichaceae; g__; s__	0.0	0.0	0.0	0.0	35.0	0.0	0.0	0.0	0.0	22.0	0.0	0.0	0.0	0.0	0.0	0.0	0.0	0.0	0.0	0.0	0.0	0.0	30.0	0.0	0.0	0.0	0.0	0.0	0.0	0.0	0.0	0.0	0.0	0.0	0.0	0.0	0.0	0.0	0.0	0.0	0.0	0.0	0.0	0.0	0.0	0.0	0.0	48.0
0d58d40b471ffb3e603df1f8b4ba5422	k__Bacteria; p__Firmicutes; c__Clostridia; o__Clostridiales; f__Ruminococcaceae; g__Ruminococcus; s__	0.0	0.0	0.0	17.0	0.0	0.0	4.0	0.0	0.0	0.0	0.0	0.0	0.0	0.0	0.0	0.0	0.0	0.0	0.0	0.0	0.0	0.0	0.0	0.0	0.0	0.0	0.0	0.0	0.0	0.0	0.0	0.0	0.0	0.0	3.0	0.0	0.0	0.0	0.0	0.0	0.0	0.0	0.0	0.0	0.0	0.0	0.0	0.0
cc0eee89526167133955be87057a03cb	k__Bacteria; p__Bacteroidetes; c__Bacteroidia; o__Bacteroidales; f__Bacteroidaceae; g__Bacteroides; s__plebeius	0.0	0.0	0.0	0.0	0.0	189.0	0.0	103.0	0.0	0.0	0.0	0.0	916.0	153.0	368.0	40.0	143.0	144.0	0.0	0.0	0.0	0.0	0.0	0.0	0.0	0.0	0.0	0.0	18.0	0.0	0.0	0.0	0.0	0.0	0.0	0.0	0.0	0.0	140.0	0.0	0.0	0.0	0.0	0.0	525.0	0.0	32.0	0.0
943e802482dcee60e63d4b7985d49c0d	k__Bacteria; p__Firmicutes; c__Clostridia; o__Clostridiales; f__Lachnospiraceae; g__Coprococcus; s__	0.0	0.0	0.0	0.0	0.0	29.0	0.0	0.0	0.0	0.0	0.0	50.0	0.0	0.0	0.0	0.0	0.0	0.0	0.0	0.0	0.0	0.0	0.0	0.0	0.0	26.0	23.0	0.0	0.0	0.0	0.0	0.0	0.0	0.0	0.0	34.0	0.0	0.0	0.0	0.0	0.0	0.0	0.0	0.0	0.0	0.0	0.0	0.0
a1b9969f5e98dc2ea0a7d362b6923101	k__Bacteria; p__Bacteroidetes; c__Bacteroidia; o__Bacteroidales; f__Rikenellaceae; g__; s__	36.0	19.0	0.0	0.0	50.0	47.0	0.0	27.0	0.0	37.0	0.0	32.0	37.0	23.0	0.0	39.0	37.0	0.0	49.0	33.0	0.0	0.0	0.0	50.0	45.0	0.0	40.0	0.0	29.0	0.0	0.0	11.0	41.0	55.0	153.0	46.0	36.0	0.0	59.0	0.0	0.0	0.0	15.0	0.0	0.0	52.0	58.0	0.0
4744058ff1b28035f1993d0a6df3566a	k__Bacteria; p__Firmicutes; c__Clostridia; o__Clostridiales; f__Lachnospiraceae	0.0	32.0	0.0	0.0	0.0	32.0	0.0	0.0	67.0	0.0	0.0	65.0	0.0	0.0	71.0	0.0	0.0	46.0	0.0	62.0	0.0	0.0	29.0	0.0	0.0	33.0	40.0	0.0	0.0	0.0	18.0	57.0	0.0	11.0	0.0	22.0	0.0	0.0	0.0	0.0	0.0	0.0	43.0	0.0	103.0	0.0	0.0	44.0
c070bdc110057bc20332138b4b39c090	k__Bacteria; p__Firmicutes; c__Clostridia; o__Clostridiales; f__Veillonellaceae; g__Veillonella; s__dispar	0.0	0.0	0.0	7.0	0.0	0.0	39.0	0.0	33.0	0.0	0.0	0.0	0.0	0.0	0.0	0.0	0.0	0.0	0.0	0.0	0.0	55.0	0.0	0.0	35.0	0.0	0.0	52.0	0.0	0.0	0.0	15.0	0.0	0.0	0.0	0.0	0.0	0.0	0.0	0.0	50.0	0.0	0.0	0.0	0.0	0.0	0.0	0.0
e53c527c8faddb5743814125a8d25b55	k__Bacteria; p__Bacteroidetes; c__Bacteroidia; o__Bacteroidales; f__Bacteroidaceae; g__Bacteroides; s__ovatus	0.0	0.0	0.0	13.0	0.0	0.0	0.0	0.0	14.0	0.0	0.0	0.0	0.0	0.0	0.0	0.0	0.0	0.0	0.0	0.0	0.0	0.0	0.0	0.0	0.0	0.0	0.0	0.0	0.0	0.0	0.0	0.0	0.0	0.0	128.0	0.0	20.0	0.0	0.0	0.0	0.0	0.0	43.0	0.0	0.0	0.0	0.0	0.0
3bb590b709c1996ca6ebab2aeed8e816	k__Bacteria; p__Firmicutes; c__Clostridia; o__Clostridiales; f__Lachnospiraceae; g__Blautia; s__	41.0	29.0	187.0	17.0	0.0	24.0	23.0	64.0	18.0	53.0	0.0	45.0	22.0	38.0	34.0	57.0	46.0	0.0	38.0	59.0	35.0	25.0	24.0	47.0	31.0	53.0	110.0	34.0	42.0	26.0	33.0	0.0	0.0	0.0	52.0	86.0	0.0	0.0	55.0	55.0	56.0	0.0	24.0	0.0	0.0	0.0	0.0	38.0
a856e6c26281891f894ca629e81da62c	k__Bacteria; p__Firmicutes; c__Clostridia; o__Clostridiales; f__Clostridiaceae; g__SMB53; s__	0.0	0.0	0.0	0.0	0.0	46.0	0.0	18.0	0.0	0.0	0.0	0.0	0.0	0.0	0.0	0.0	0.0	20.0	0.0	0.0	0.0	0.0	0.0	0.0	0.0	0.0	0.0	33.0	0.0	0.0	0.0	0.0	0.0	0.0	138.0	0.0	33.0	0.0	0.0	0.0	12.0	0.0	0.0	0.0	0.0	0.0	33.0	37.0
d7bcfeed8ca0c5df435a876dfff90b55	k__Bacteria; p__Bacteroidetes; c__Bacteroidia; o__Bacteroidales; f__Bacteroidaceae; g__Bacteroides; s__caccae	0.0	16.0	0.0	88.0	0.0	0.0	0.0	0.0	0.0	63.0	0.0	0.0	0.0	0.0	0.0	0.0	0.0	0.0	0.0	0.0	0.0	0.0	0.0	0.0	0.0	0.0	0.0	0.0	0.0	0.0	0.0	0.0	206.0	0.0	72.0	149.0	0.0	0.0	0.0	191.0	0.0	0.0	0.0	38.0	0.0	0.0	29.0	0.0
42dc46d3d5c5644b61f9c70edea68d4b	k__Bacteria; p__Firmicutes; c__Clostridia; o__Clostridiales; f__Lachnospiraceae; g__[Ruminococcus]; s__torques	17.0	0.0	22.0	0.0	128.0	0.0	0.0	25.0	0.0	0.0	0.0	0.0	0.0	0.0	0.0	34.0	0.0	0.0	28.0	0.0	27.0	0.0	0.0	0.0	18.0	69.0	35.0	0.0	0.0	0.0	33.0	0.0	44.0	19.0	36.0	0.0	0.0	67.0	0.0	0.0	0.0	128.0	0.0	0.0	0.0	0.0	34.0	91.0
8391b6dbde137ec98cc04e6c4ca433d9	k__Bacteria; p__Firmicutes; c__Clostridia; o__Clostridiales; f__Lachnospiraceae; g__Coprococcus; s__	0.0	41.0	68.0	0.0	20.0	36.0	20.0	47.0	18.0	57.0	0.0	28.0	10.0	0.0	0.0	59.0	14.0	0.0	0.0	0.0	16.0	0.0	0.0	27.0	20.0	15.0	0.0	0.0	0.0	20.0	26.0	0.0	0.0	0.0	50.0	37.0	36.0	30.0	22.0	44.0	0.0	4.0	0.0	48.0	0.0	0.0	0.0	34.0
d5550055d6657f9a2979d3045220d0f4	k__Bacteria; p__Firmicutes; c__Clostridia; o__Clostridiales; f__Lachnospiraceae; g__Clostridium; s__hathewayi	0.0	0.0	0.0	0.0	125.0	0.0	0.0	0.0	0.0	0.0	0.0	0.0	0.0	0.0	0.0	0.0	0.0	0.0	0.0	0.0	0.0	0.0	0.0	0.0	8.0	0.0	0.0	0.0	0.0	0.0	0.0	0.0	22.0	0.0	0.0	0.0	0.0	0.0	0.0	0.0	0.0	22.0	0.0	0.0	0.0	0.0	0.0	22.0
eca186c69fa4a2055616b060fbe9843d	k__Bacteria; p__Firmicutes; c__Clostridia; o__Clostridiales; f__Veillonellaceae; g__Veillonella; s__parvula	0.0	0.0	0.0	0.0	0.0	0.0	36.0	0.0	154.0	0.0	0.0	0.0	0.0	0.0	27.0	0.0	0.0	0.0	0.0	0.0	0.0	0.0	0.0	0.0	0.0	0.0	0.0	0.0	0.0	0.0	0.0	0.0	0.0	0.0	0.0	0.0	10.0	0.0	0.0	0.0	0.0	0.0	0.0	0.0	25.0	0.0	0.0	36.0
fe8ec464405e3e98f01be8e40001956a	k__Bacteria; p__Bacteroidetes; c__Bacteroidia; o__Bacteroidales; f__Rikenellaceae; g__; s__	0.0	0.0	0.0	0.0	0.0	0.0	21.0	0.0	0.0	20.0	0.0	48.0	34.0	0.0	41.0	20.0	21.0	36.0	0.0	0.0	0.0	0.0	24.0	0.0	0.0	35.0	44.0	0.0	32.0	0.0	100.0	9.0	29.0	75.0	90.0	63.0	0.0	104.0	35.0	0.0	31.0	2.0	0.0	18.0	0.0	0.0	0.0	0.0
697b0f7110d98fe94d4057469761e6fa	k__Bacteria; p__Firmicutes; c__Clostridia; o__Clostridiales; f__Lachnospiraceae; g__Clostridium	0.0	0.0	0.0	0.0	63.0	0.0	0.0	0.0	41.0	0.0	0.0	0.0	0.0	0.0	0.0	44.0	0.0	0.0	48.0	0.0	0.0	0.0	0.0	0.0	34.0	0.0	0.0	0.0	0.0	0.0	0.0	0.0	0.0	39.0	0.0	0.0	0.0	0.0	0.0	0.0	133.0	27.0	0.0	0.0	0.0	0.0	0.0	42.0
9d4e8ee8fc964a320e6efbde3a30b270	k__Bacteria; p__Firmicutes; c__Clostridia; o__Clostridiales; f__Lachnospiraceae; g__; s__	0.0	0.0	0.0	0.0	0.0	0.0	0.0	0.0	0.0	0.0	0.0	0.0	0.0	49.0	0.0	13.0	0.0	0.0	0.0	0.0	0.0	0.0	0.0	0.0	0.0	0.0	0.0	0.0	0.0	0.0	0.0	0.0	0.0	0.0	0.0	40.0	0.0	0.0	0.0	0.0	0.0	0.0	0.0	0.0	0.0	0.0	0.0	0.0
f2c6bc34623fc5a8720db3a6e03bb9b6	k__Bacteria; p__Bacteroidetes; c__Bacteroidia; o__Bacteroidales; f__Rikenellaceae; g__; s__	0.0	32.0	0.0	0.0	61.0	0.0	0.0	0.0	22.0	55.0	35.0	0.0	0.0	0.0	0.0	0.0	32.0	0.0	0.0	0.0	0.0	0.0	0.0	0.0	0.0	38.0	0.0	0.0	48.0	57.0	0.0	29.0	0.0	12.0	63.0	0.0	160.0	68.0	0.0	0.0	0.0	22.0	26.0	8.0	0.0	0.0	0.0	0.0
e37dba1608aafb21f6c51dd721e39455	k__Bacteria; p__Bacteroidetes; c__Bacteroidia; o__Bacteroidales; f__Bacteroidaceae; g__Bacteroides; s__	0.0	148.0	0.0	476.0	0.0	0.0	0.0	31.0	342.0	31.0	38.0	0.0	0.0	0.0	236.0	669.0	0.0	0.0	0.0	0.0	16.0	0.0	0.0	137.0	1187.0	180.0	0.0	0.0	0.0	0.0	0.0	21.0	22.0	63.0	0.0	0.0	0.0	20.0	31.0	0.0	0.0	0.0	776.0	0.0	72.0	184.0	0.0	49.0
2178aab7dbb78c34134d0154f5f45e4d	k__Bacteria; p__Firmicutes; c__Clostridia; o__Clostridiales; f__Lachnospiraceae; g__Lachnospira; s__	62.0	0.0	0.0	0.0	0.0	53.0	0.0	0.0	0.0	0.0	0.0	37.0	0.0	0.0	0.0	54.0	0.0	45.0	0.0	56.0	0.0	113.0	0.0	80.0	0.0	0.0	63.0	0.0	0.0	0.0	56.0	0.0	0.0	0.0	0.0	0.0	0.0	0.0	77.0	0.0	0.0	46.0	0.0	0.0	0.0	0.0	0.0	33.0
f9b73e4e4f1c5fea85e20f022a82176f	k__Bacteria; p__Firmicutes; c__Clostridia; o__Clostridiales; f__Ruminococcaceae; g__Ruminococcus; s__	0.0	0.0	0.0	0.0	0.0	0.0	0.0	0.0	0.0	77.0	0.0	0.0	0.0	0.0	0.0	0.0	0.0	0.0	0.0	0.0	0.0	0.0	0.0	0.0	0.0	0.0	0.0	0.0	0.0	0.0	0.0	0.0	31.0	0.0	0.0	0.0	0.0	0.0	0.0	0.0	0.0	0.0	0.0	0.0	0.0	0.0	0.0	0.0
602472f11352e1d218c3419712897bbd	k__Bacteria; p__Firmicutes; c__Clostridia; o__Clostridiales; f__Ruminococcaceae; g__Butyricicoccus; s__pullicaecorum	0.0	0.0	0.0	0.0	0.0	0.0	0.0	0.0	0.0	0.0	0.0	32.0	0.0	0.0	0.0	0.0	0.0	0.0	0.0	0.0	32.0	0.0	38.0	0.0	0.0	0.0	0.0	0.0	0.0	0.0	0.0	0.0	0.0	25.0	0.0	0.0	0.0	0.0	0.0	0.0	0.0	0.0	0.0	31.0	0.0	0.0	0.0	0.0
5ba1b60b6adf3066e4081790cc35a58f	k__Bacteria; p__Proteobacteria; c__Alphaproteobacteria; o__RF32; f__; g__; s__	0.0	182.0	0.0	0.0	0.0	0.0	0.0	0.0	0.0	0.0	0.0	45.0	0.0	0.0	0.0	62.0	0.0	0.0	0.0	0.0	0.0	671.0	0.0	0.0	37.0	25.0	0.0	0.0	0.0	0.0	0.0	0.0	0.0	0.0	51.0	255.0	0.0	0.0	107.0	0.0	0.0	0.0	0.0	0.0	0.0	29.0	0.0	0.0
87f7b6b8a44d4c9c96cf82eddb83438c	k__Bacteria; p__Bacteroidetes; c__Bacteroidia; o__Bacteroidales; f__Bacteroidaceae; g__Bacteroides; s__caccae	64.0	0.0	0.0	0.0	140.0	0.0	56.0	0.0	4.0	0.0	0.0	0.0	0.0	0.0	27.0	0.0	55.0	0.0	0.0	71.0	48.0	0.0	0.0	277.0	139.0	0.0	45.0	0.0	0.0	0.0	0.0	41.0	0.0	0.0	101.0	69.0	58.0	58.0	0.0	0.0	0.0	768.0	0.0	0.0	47.0	31.0	0.0	151.0
a839a7f59acef05e724960ad43585658	k__Bacteria; p__Firmicutes; c__Clostridia; o__Clostridiales; f__Ruminococcaceae; g__Butyricicoccus; s__pullicaecorum	0.0	0.0	0.0	0.0	0.0	0.0	68.0	0.0	54.0	0.0	0.0	0.0	0.0	0.0	0.0	33.0	0.0	0.0	0.0	0.0	0.0	79.0	0.0	28.0	0.0	0.0	0.0	0.0	0.0	102.0	0.0	0.0	0.0	0.0	48.0	0.0	86.0	0.0	0.0	0.0	57.0	0.0	0.0	0.0	0.0	0.0	0.0	11.0
7e6fd6c129275dd349d88ec41921dcce	k__Bacteria; p__Firmicutes; c__Clostridia; o__Clostridiales; f__Lachnospiraceae; g__[Ruminococcus]; s__gnavus	0.0	0.0	306.0	28.0	0.0	0.0	0.0	0.0	0.0	0.0	0.0	0.0	0.0	0.0	0.0	0.0	0.0	0.0	0.0	0.0	55.0	0.0	47.0	0.0	25.0	0.0	0.0	71.0	0.0	0.0	0.0	0.0	0.0	0.0	0.0	0.0	0.0	0.0	0.0	0.0	212.0	0.0	0.0	0.0	0.0	0.0	0.0	0.0
23d9d3af6d47c62de3b0b91a952ac24c	k__Bacteria; p__Firmicutes; c__Clostridia; o__Clostridiales; f__Lachnospiraceae; g__; s__	60.0	0.0	0.0	0.0	0.0	0.0	71.0	0.0	38.0	27.0	0.0	0.0	0.0	29.0	0.0	33.0	0.0	28.0	0.0	34.0	85.0	0.0	0.0	76.0	50.0	54.0	39.0	42.0	69.0	0.0	0.0	0.0	24.0	0.0	73.0	0.0	0.0	0.0	0.0	30.0	0.0	0.0	0.0	0.0	42.0	0.0	27.0	0.0
65f7943a7b95eb6ab68875abc83e1aac	k__Bacteria; p__Firmicutes; c__Erysipelotrichi; o__Erysipelotrichales; f__Erysipelotrichaceae; g__[Eubacterium]; s__biforme	0.0	0.0	0.0	0.0	0.0	0.0	0.0	0.0	0.0	24.0	0.0	0.0	0.0	0.0	0.0	0.0	0.0	78.0	0.0	0.0	0.0	0.0	0.0	0.0	0.0	0.0	56.0	0.0	0.0	0.0	0.0	0.0	0.0	0.0	0.0	0.0	0.0	0.0	0.0	0.0	0.0	103.0	0.0	18.0	0.0	0.0	0.0	0.0
ae26e8cb08744ba46e83e9e1d4b4d482	k__Bacteria; p__Bacteroidetes; c__Bacteroidia; o__Bacteroidales; f__Bacteroidaceae; g__Bacteroides; s__ovatus	0.0	13.0	0.0	29.0	0.0	0.0	0.0	0.0	10.0	0.0	0.0	0.0	0.0	0.0	0.0	0.0	0.0	10.0	0.0	29.0	0.0	0.0	0.0	0.0	0.0	25.0	0.0	38.0	0.0	0.0	0.0	0.0	0.0	0.0	281.0	17.0	30.0	0.0	0.0	0.0	0.0	0.0	35.0	0.0	27.0	0.0	0.0	0.0
0206c426616b43f6765ffe04fb317b65	k__Bacteria; p__Firmicutes; c__Clostridia; o__Clostridiales; f__Lachnospiraceae; g__; s__	0.0	53.0	0.0	21.0	0.0	65.0	0.0	0.0	0.0	68.0	0.0	82.0	0.0	49.0	25.0	38.0	0.0	0.0	50.0	13.0	0.0	0.0	0.0	43.0	0.0	97.0	80.0	31.0	0.0	28.0	0.0	0.0	0.0	0.0	50.0	64.0	0.0	0.0	27.0	42.0	0.0	0.0	37.0	42.0	20.0	0.0	44.0	37.0
3a28b99e003fa01cf09604d8f3af23bb	k__Bacteria; p__Verrucomicrobia; c__Verrucomicrobiae; o__Verrucomicrobiales; f__Verrucomicrobiaceae; g__Akkermansia; s__muciniphila	37.0	231.0	0.0	0.0	0.0	0.0	0.0	0.0	235.0	0.0	422.0	287.0	37.0	0.0	0.0	0.0	0.0	0.0	27.0	0.0	0.0	0.0	0.0	93.0	309.0	14.0	201.0	0.0	63.0	45.0	0.0	0.0	38.0	0.0	0.0	117.0	0.0	0.0	0.0	0.0	0.0	0.0	0.0	0.0	0.0	0.0	50.0	0.0
0192abbf253cbc3f3721f8d88fc65fb8	k__Bacteria; p__Firmicutes; c__Clostridia; o__Clostridiales; f__Lachnospiraceae	0.0	27.0	0.0	0.0	0.0	0.0	0.0	0.0	0.0	0.0	35.0	0.0	30.0	0.0	0.0	0.0	0.0	45.0	0.0	0.0	0.0	0.0	0.0	0.0	0.0	0.0	47.0	0.0	0.0	0.0	0.0	0.0	0.0	0.0	0.0	0.0	0.0	0.0	15.0	0.0	0.0	0.0	0.0	0.0	0.0	0.0	0.0	0.0
cde2e0ce23c4940fad7b3811f8e51259	k__Bacteria; p__Firmicutes; c__Clostridia; o__Clostridiales; f__Lachnospiraceae	0.0	0.0	0.0	0.0	0.0	0.0	26.0	0.0	49.0	0.0	0.0	0.0	0.0	0.0	0.0	0.0	0.0	0.0	26.0	0.0	39.0	0.0	0.0	0.0	0.0	0.0	0.0	0.0	0.0	0.0	0.0	0.0	0.0	0.0	0.0	0.0	0.0	65.0	0.0	0.0	0.0	0.0	0.0	0.0	0.0	0.0	0.0	37.0
dbd68092022cd914cc0fc5392a4bc73f	k__Bacteria; p__Firmicutes; c__Clostridia; o__Clostridiales; f__Clostridiaceae; g__Clostridium; s__	0.0	33.0	0.0	70.0	0.0	39.0	40.0	26.0	42.0	0.0	0.0	60.0	24.0	0.0	57.0	25.0	0.0	58.0	48.0	40.0	59.0	62.0	30.0	48.0	0.0	24.0	35.0	52.0	25.0	40.0	50.0	53.0	14.0	0.0	44.0	51.0	83.0	33.0	30.0	65.0	25.0	0.0	30.0	0.0	211.0	0.0	0.0	88.0
e0747b752d2079b56128a9fc447d5313	k__Bacteria; p__Firmicutes; c__Clostridia; o__Clostridiales; f__Ruminococcaceae	0.0	0.0	0.0	0.0	0.0	0.0	0.0	0.0	0.0	0.0	0.0	0.0	0.0	0.0	0.0	0.0	0.0	0.0	0.0	0.0	0.0	0.0	0.0	0.0	0.0	0.0	0.0	0.0	33.0	0.0	0.0	0.0	0.0	27.0	0.0	0.0	0.0	0.0	0.0	0.0	0.0	0.0	0.0	0.0	0.0	69.0	0.0	0.0
f3cfab7765fffc96f6f3049922fe693a	k__Bacteria; p__Firmicutes; c__Clostridia; o__Clostridiales; f__; g__; s__	0.0	0.0	0.0	0.0	0.0	0.0	0.0	0.0	0.0	0.0	12.0	33.0	0.0	0.0	0.0	0.0	0.0	0.0	0.0	0.0	0.0	0.0	0.0	0.0	0.0	0.0	0.0	0.0	44.0	0.0	0.0	0.0	58.0	0.0	14.0	0.0	0.0	0.0	0.0	0.0	0.0	0.0	0.0	29.0	0.0	0.0	0.0	0.0
89e782ba2a28486755d00c447f076a5b	k__Bacteria; p__Firmicutes; c__Erysipelotrichi; o__Erysipelotrichales; f__Erysipelotrichaceae; g__Clostridium; s__ramosum	0.0	0.0	23.0	0.0	18.0	0.0	0.0	0.0	0.0	0.0	0.0	0.0	0.0	0.0	0.0	0.0	0.0	0.0	0.0	0.0	0.0	0.0	0.0	0.0	0.0	0.0	0.0	0.0	0.0	0.0	0.0	0.0	0.0	0.0	0.0	0.0	0.0	21.0	0.0	0.0	30.0	0.0	0.0	0.0	0.0	0.0	0.0	6.0
f1d33c584e1286a141f66f2eb7caf84d	k__Bacteria; p__Firmicutes; c__Clostridia; o__Clostridiales; f__Ruminococcaceae; g__Oscillospira; s__	0.0	0.0	0.0	0.0	0.0	0.0	0.0	0.0	0.0	32.0	0.0	0.0	0.0	0.0	0.0	0.0	0.0	0.0	32.0	0.0	0.0	0.0	0.0	0.0	0.0	0.0	0.0	14.0	0.0	14.0	0.0	0.0	0.0	0.0	0.0	0.0	0.0	0.0	26.0	0.0	18.0	0.0	0.0	0.0	0.0	19.0	0.0	0.0
7da5161c373fde14e771eab57febf77a	k__Bacteria; p__Firmicutes; c__Clostridia; o__Clostridiales; f__Clostridiaceae; g__Clostridium; s__celatum	0.0	0.0	38.0	26.0	202.0	25.0	0.0	148.0	0.0	0.0	0.0	0.0	0.0	0.0	0.0	0.0	0.0	53.0	0.0	0.0	0.0	0.0	0.0	16.0	0.0	53.0	0.0	114.0	59.0	0.0	40.0	65.0	77.0	61.0	380.0	0.0	61.0	45.0	0.0	0.0	120.0	0.0	0.0	0.0	60.0	0.0	28.0	201.0
68075ea74da9c9f144f930dad0631cfc	k__Bacteria; p__Firmicutes; c__Clostridia; o__Clostridiales; f__Lachnospiraceae	0.0	0.0	0.0	0.0	0.0	0.0	0.0	0.0	0.0	52.0	0.0	0.0	0.0	0.0	0.0	0.0	0.0	0.0	0.0	0.0	0.0	0.0	0.0	0.0	0.0	15.0	0.0	0.0	0.0	0.0	0.0	0.0	0.0	0.0	23.0	0.0	0.0	0.0	42.0	0.0	0.0	0.0	3.0	0.0	0.0	0.0	0.0	7.0
3eee37153ad4b16256fd733a618ed405	k__Bacteria; p__Firmicutes; c__Clostridia; o__Clostridiales; f__Lachnospiraceae; g__Clostridium; s__lavalense	0.0	0.0	0.0	0.0	0.0	0.0	0.0	0.0	0.0	0.0	0.0	0.0	0.0	0.0	0.0	0.0	0.0	0.0	0.0	0.0	0.0	0.0	0.0	0.0	0.0	0.0	0.0	0.0	0.0	0.0	0.0	0.0	0.0	0.0	0.0	0.0	0.0	0.0	0.0	0.0	0.0	18.0	0.0	0.0	0.0	0.0	0.0	32.0
dec3e05e3d28725b5acf080794a6a5be	k__Bacteria; p__Bacteroidetes; c__Bacteroidia; o__Bacteroidales; f__Bacteroidaceae; g__Bacteroides; s__	0.0	22.0	0.0	0.0	0.0	87.0	0.0	0.0	28.0	0.0	0.0	0.0	0.0	0.0	0.0	0.0	0.0	0.0	95.0	0.0	0.0	0.0	0.0	0.0	0.0	0.0	0.0	0.0	0.0	0.0	0.0	0.0	0.0	0.0	0.0	0.0	0.0	0.0	0.0	0.0	0.0	0.0	0.0	0.0	0.0	0.0	0.0	0.0
4b5504ca6a3af85297a1dcd33e8a628a	k__Bacteria; p__Proteobacteria; c__Gammaproteobacteria; o__Enterobacteriales; f__Enterobacteriaceae	0.0	0.0	0.0	0.0	0.0	0.0	0.0	0.0	0.0	21.0	0.0	0.0	0.0	14.0	0.0	0.0	0.0	5.0	0.0	0.0	0.0	0.0	0.0	0.0	0.0	0.0	0.0	0.0	0.0	0.0	0.0	0.0	0.0	0.0	0.0	0.0	0.0	0.0	0.0	0.0	0.0	0.0	0.0	0.0	0.0	0.0	0.0	6.0
259dc63d7474a21b670312293e90f33a	k__Bacteria; p__Bacteroidetes; c__Bacteroidia; o__Bacteroidales; f__Bacteroidaceae; g__Bacteroides; s__ovatus	0.0	0.0	0.0	2.0	0.0	0.0	0.0	0.0	0.0	0.0	0.0	0.0	0.0	0.0	0.0	0.0	0.0	37.0	0.0	0.0	0.0	0.0	0.0	0.0	0.0	7.0	0.0	0.0	0.0	16.0	0.0	0.0	0.0	0.0	140.0	0.0	0.0	0.0	0.0	0.0	0.0	0.0	2.0	0.0	50.0	25.0	0.0	0.0
3afec098b222e917ee8ed48685f9122e	k__Bacteria; p__Firmicutes; c__Clostridia; o__Clostridiales; f__Lachnospiraceae	21.0	32.0	0.0	52.0	0.0	15.0	50.0	0.0	0.0	53.0	0.0	91.0	0.0	104.0	50.0	0.0	0.0	0.0	0.0	0.0	0.0	0.0	63.0	0.0	31.0	0.0	0.0	0.0	16.0	43.0	0.0	16.0	0.0	0.0	68.0	0.0	0.0	23.0	0.0	0.0	0.0	0.0	0.0	0.0	0.0	0.0	0.0	0.0
444ee28ca43b0c93fda371a3695dda06	k__Bacteria; p__Bacteroidetes; c__Bacteroidia; o__Bacteroidales; f__Rikenellaceae; g__Alistipes; s__indistinctus	0.0	0.0	0.0	0.0	0.0	0.0	0.0	0.0	31.0	238.0	0.0	39.0	46.0	24.0	0.0	25.0	37.0	0.0	0.0	0.0	0.0	0.0	18.0	0.0	0.0	29.0	0.0	0.0	0.0	49.0	21.0	24.0	0.0	42.0	0.0	0.0	0.0	0.0	0.0	0.0	0.0	0.0	41.0	0.0	0.0	40.0	28.0	0.0
34b5594378be231a74df5e5ba6b480d3	k__Bacteria; p__Firmicutes; c__Erysipelotrichi; o__Erysipelotrichales; f__Erysipelotrichaceae; g__; s__	0.0	15.0	0.0	34.0	0.0	51.0	49.0	0.0	0.0	112.0	0.0	32.0	0.0	0.0	0.0	0.0	32.0	11.0	0.0	0.0	38.0	0.0	26.0	35.0	0.0	34.0	46.0	0.0	29.0	44.0	37.0	0.0	0.0	0.0	56.0	22.0	13.0	0.0	0.0	7.0	0.0	27.0	38.0	0.0	0.0	0.0	0.0	13.0
32ba053e744c87063dd90ccb3a9b71cb	k__Bacteria; p__Firmicutes; c__Clostridia; o__Clostridiales; f__Lachnospiraceae	18.0	19.0	0.0	0.0	0.0	0.0	0.0	0.0	0.0	0.0	0.0	0.0	0.0	0.0	0.0	0.0	0.0	0.0	0.0	0.0	0.0	0.0	0.0	10.0	0.0	0.0	0.0	0.0	0.0	0.0	0.0	0.0	0.0	0.0	0.0	0.0	0.0	0.0	0.0	0.0	0.0	0.0	0.0	0.0	0.0	0.0	0.0	20.0
e0bd4c3fc3524d140916fd116309ca3b	k__Bacteria; p__Firmicutes; c__Clostridia; o__Clostridiales; f__Lachnospiraceae; g__; s__	0.0	0.0	0.0	0.0	0.0	35.0	0.0	0.0	0.0	67.0	0.0	0.0	0.0	0.0	0.0	0.0	0.0	0.0	0.0	0.0	0.0	0.0	0.0	0.0	0.0	0.0	0.0	0.0	0.0	0.0	32.0	0.0	0.0	0.0	8.0	0.0	0.0	0.0	0.0	0.0	0.0	0.0	0.0	0.0	0.0	0.0	16.0	0.0
0030025fa79e89967628ed465edc99f8	k__Bacteria; p__Bacteroidetes; c__Bacteroidia; o__Bacteroidales; f__[Barnesiellaceae]; g__; s__	0.0	0.0	0.0	0.0	0.0	0.0	0.0	0.0	0.0	0.0	0.0	0.0	0.0	0.0	0.0	0.0	13.0	0.0	0.0	0.0	0.0	0.0	0.0	80.0	0.0	0.0	0.0	0.0	0.0	0.0	0.0	0.0	0.0	0.0	0.0	0.0	0.0	0.0	0.0	0.0	0.0	0.0	0.0	0.0	0.0	73.0	0.0	422.0
74f4ee32bd8dc98317aa2bd96edc0d79	k__Bacteria; p__Firmicutes; c__Clostridia; o__Clostridiales; f__Lachnospiraceae; g__Clostridium; s__aldenense	0.0	0.0	0.0	0.0	0.0	0.0	0.0	0.0	0.0	0.0	0.0	0.0	0.0	0.0	0.0	0.0	0.0	0.0	0.0	0.0	0.0	0.0	0.0	0.0	0.0	0.0	0.0	0.0	0.0	0.0	0.0	0.0	0.0	0.0	0.0	0.0	0.0	0.0	0.0	0.0	37.0	0.0	0.0	0.0	0.0	0.0	0.0	19.0
d85ce573492b3aece09702097de6bdda	k__Bacteria; p__Firmicutes; c__Clostridia; o__Clostridiales; f__Lachnospiraceae	0.0	0.0	0.0	0.0	0.0	34.0	0.0	0.0	0.0	0.0	0.0	0.0	0.0	0.0	56.0	0.0	0.0	43.0	0.0	51.0	25.0	28.0	80.0	90.0	0.0	65.0	44.0	0.0	0.0	0.0	49.0	0.0	0.0	0.0	25.0	28.0	29.0	0.0	0.0	33.0	0.0	0.0	0.0	36.0	59.0	0.0	0.0	45.0
bffbb115ee038ecc3a48923fb5cf2d4f	k__Bacteria; p__Firmicutes; c__Clostridia; o__Clostridiales; f__Lachnospiraceae	0.0	0.0	0.0	0.0	465.0	0.0	0.0	0.0	0.0	0.0	0.0	0.0	0.0	0.0	0.0	0.0	0.0	0.0	0.0	0.0	0.0	0.0	0.0	0.0	25.0	0.0	0.0	0.0	0.0	0.0	74.0	0.0	0.0	0.0	0.0	0.0	0.0	73.0	0.0	0.0	0.0	68.0	0.0	0.0	0.0	94.0	0.0	58.0
94ef913fbb660284c567a6f3b5705279	k__Bacteria; p__Firmicutes; c__Clostridia; o__Clostridiales; f__Lachnospiraceae	0.0	0.0	0.0	0.0	0.0	22.0	0.0	0.0	0.0	53.0	0.0	0.0	0.0	0.0	0.0	0.0	0.0	17.0	0.0	45.0	0.0	36.0	50.0	76.0	0.0	0.0	67.0	0.0	0.0	0.0	0.0	0.0	29.0	0.0	21.0	24.0	0.0	0.0	0.0	50.0	0.0	0.0	0.0	0.0	33.0	0.0	0.0	26.0
88718faedf9dd114e32de2d9741ce186	k__Bacteria; p__Bacteroidetes; c__Bacteroidia; o__Bacteroidales; f__Rikenellaceae; g__Alistipes; s__finegoldii	0.0	0.0	0.0	0.0	0.0	0.0	0.0	0.0	0.0	42.0	0.0	0.0	0.0	6.0	0.0	0.0	0.0	0.0	0.0	0.0	0.0	19.0	211.0	0.0	0.0	0.0	40.0	0.0	0.0	0.0	0.0	0.0	0.0	0.0	0.0	0.0	0.0	0.0	0.0	0.0	0.0	0.0	0.0	0.0	0.0	0.0	0.0	0.0
7d1cc9cc67d7140c6bf45c80b9b20212	k__Bacteria; p__Firmicutes; c__Clostridia; o__Clostridiales; f__Lachnospiraceae	0.0	0.0	0.0	0.0	0.0	0.0	0.0	13.0	0.0	0.0	12.0	31.0	0.0	0.0	0.0	37.0	0.0	0.0	0.0	0.0	0.0	0.0	0.0	0.0	0.0	0.0	0.0	0.0	0.0	0.0	18.0	0.0	0.0	0.0	59.0	22.0	0.0	0.0	0.0	0.0	0.0	0.0	0.0	0.0	0.0	0.0	0.0	0.0
5bee1afcd6d601a4e3af163e6b14634a	k__Bacteria; p__Firmicutes; c__Clostridia; o__Clostridiales; f__Lachnospiraceae; g__[Ruminococcus]; s__gnavus	0.0	0.0	263.0	33.0	0.0	0.0	0.0	0.0	39.0	0.0	0.0	0.0	0.0	0.0	0.0	0.0	0.0	0.0	17.0	0.0	58.0	0.0	63.0	0.0	16.0	0.0	0.0	0.0	0.0	0.0	0.0	0.0	0.0	0.0	0.0	0.0	0.0	0.0	0.0	0.0	255.0	0.0	0.0	0.0	0.0	0.0	0.0	0.0
a43244a6eef8c3935f7d308aba53477c	k__Bacteria; p__Firmicutes; c__Clostridia; o__Clostridiales; f__Ruminococcaceae; g__Faecalibacterium; s__prausnitzii	0.0	0.0	0.0	0.0	0.0	0.0	0.0	13.0	0.0	0.0	0.0	0.0	0.0	0.0	0.0	0.0	0.0	33.0	0.0	0.0	0.0	0.0	0.0	0.0	0.0	0.0	13.0	0.0	0.0	0.0	0.0	0.0	0.0	58.0	0.0	0.0	0.0	2.0	0.0	0.0	0.0	0.0	29.0	0.0	45.0	0.0	18.0	0.0
525e51e8f3b485c68610edff93f04f6b	k__Bacteria; p__Bacteroidetes; c__Bacteroidia; o__Bacteroidales; f__Bacteroidaceae; g__Bacteroides; s__ovatus	0.0	0.0	0.0	0.0	0.0	0.0	0.0	0.0	0.0	0.0	0.0	40.0	0.0	0.0	37.0	0.0	0.0	0.0	0.0	0.0	37.0	69.0	0.0	0.0	32.0	0.0	0.0	0.0	0.0	0.0	41.0	0.0	0.0	0.0	0.0	0.0	0.0	0.0	0.0	43.0	0.0	0.0	0.0	0.0	0.0	0.0	0.0	0.0
0b3e21c966943e1693ca4d3a6c03877b	k__Bacteria; p__Firmicutes; c__Clostridia; o__Clostridiales; f__Ruminococcaceae; g__Butyricicoccus; s__pullicaecorum	0.0	0.0	0.0	0.0	0.0	0.0	0.0	0.0	0.0	10.0	0.0	0.0	0.0	0.0	0.0	0.0	0.0	0.0	0.0	0.0	0.0	0.0	0.0	11.0	0.0	39.0	0.0	0.0	0.0	0.0	0.0	34.0	0.0	0.0	25.0	0.0	0.0	0.0	0.0	0.0	0.0	0.0	0.0	0.0	0.0	0.0	0.0	48.0
5f38825f207c931af4afbe649127d80a	k__Bacteria; p__Firmicutes; c__Clostridia; o__Clostridiales; f__Ruminococcaceae; g__Faecalibacterium; s__prausnitzii	44.0	39.0	0.0	0.0	0.0	35.0	79.0	24.0	0.0	51.0	0.0	64.0	19.0	66.0	182.0	0.0	32.0	36.0	0.0	422.0	0.0	56.0	210.0	93.0	70.0	50.0	60.0	80.0	35.0	46.0	93.0	36.0	0.0	53.0	717.0	278.0	17.0	34.0	33.0	246.0	0.0	0.0	184.0	43.0	127.0	41.0	47.0	291.0
f7cc2951c76d1c26b96f4fb0f3b40cb8	k__Bacteria; p__Bacteroidetes; c__Bacteroidia; o__Bacteroidales; f__Rikenellaceae; g__Alistipes; s__onderdonkii	39.0	43.0	0.0	0.0	925.0	69.0	0.0	0.0	41.0	41.0	0.0	90.0	32.0	12.0	0.0	0.0	35.0	0.0	0.0	79.0	0.0	0.0	0.0	27.0	319.0	120.0	44.0	0.0	0.0	0.0	187.0	69.0	0.0	98.0	43.0	0.0	87.0	0.0	51.0	0.0	0.0	10.0	52.0	49.0	0.0	44.0	21.0	351.0
417f9bc182027c67c3d4fa4fe3434075	k__Bacteria; p__Bacteroidetes; c__Bacteroidia; o__Bacteroidales; f__[Barnesiellaceae]; g__; s__	68.0	0.0	0.0	0.0	24.0	0.0	0.0	0.0	0.0	0.0	43.0	0.0	38.0	0.0	0.0	45.0	0.0	0.0	0.0	0.0	0.0	0.0	12.0	0.0	0.0	0.0	33.0	0.0	0.0	0.0	0.0	0.0	0.0	0.0	0.0	0.0	0.0	0.0	0.0	0.0	0.0	0.0	0.0	0.0	0.0	0.0	0.0	0.0
538eaf086d3c036413511bb75981bc1e	k__Bacteria; p__Firmicutes; c__Clostridia; o__Clostridiales; f__Ruminococcaceae; g__Oscillospira; s__	0.0	55.0	0.0	0.0	49.0	54.0	0.0	26.0	0.0	53.0	0.0	0.0	0.0	0.0	0.0	0.0	0.0	0.0	47.0	0.0	0.0	0.0	0.0	0.0	0.0	0.0	0.0	0.0	0.0	0.0	0.0	0.0	0.0	0.0	11.0	0.0	0.0	19.0	0.0	0.0	0.0	0.0	0.0	0.0	0.0	0.0	0.0	0.0
01a9de9f3a0295295427782956c819f5	k__Bacteria; p__Firmicutes; c__Clostridia; o__Clostridiales; f__Ruminococcaceae; g__Gemmiger; s__formicilis	45.0	49.0	0.0	0.0	74.0	99.0	86.0	45.0	0.0	38.0	59.0	104.0	0.0	35.0	58.0	183.0	53.0	36.0	77.0	63.0	43.0	49.0	105.0	366.0	89.0	108.0	51.0	46.0	41.0	36.0	54.0	37.0	28.0	63.0	329.0	81.0	41.0	268.0	24.0	199.0	56.0	62.0	434.0	40.0	61.0	0.0	38.0	81.0
b9e17ebc310871c1a7085f4f0c51c5ba	k__Bacteria; p__Firmicutes; c__Clostridia; o__Clostridiales; f__Lachnospiraceae; g__Coprococcus; s__	0.0	0.0	0.0	0.0	0.0	0.0	0.0	0.0	0.0	0.0	0.0	23.0	0.0	0.0	0.0	0.0	0.0	25.0	0.0	0.0	0.0	0.0	0.0	0.0	0.0	0.0	0.0	0.0	0.0	0.0	0.0	0.0	0.0	0.0	32.0	0.0	0.0	0.0	0.0	0.0	0.0	0.0	0.0	0.0	0.0	0.0	0.0	0.0
852bb8d74e774e3356e6f9d089b66324	k__Bacteria; p__Bacteroidetes; c__Bacteroidia; o__Bacteroidales; f__[Odoribacteraceae]; g__Butyricimonas; s__	0.0	11.0	0.0	0.0	0.0	0.0	0.0	0.0	0.0	0.0	18.0	0.0	0.0	0.0	0.0	0.0	21.0	0.0	0.0	23.0	0.0	0.0	0.0	0.0	0.0	0.0	0.0	0.0	0.0	0.0	2.0	0.0	0.0	0.0	0.0	0.0	0.0	0.0	0.0	0.0	0.0	21.0	0.0	0.0	0.0	0.0	0.0	0.0
65ca455e0a96c9d30ba15aabb986cbfe	k__Bacteria; p__Bacteroidetes; c__Bacteroidia; o__Bacteroidales; f__Bacteroidaceae; g__Bacteroides	0.0	0.0	0.0	7.0	0.0	0.0	0.0	0.0	0.0	0.0	0.0	0.0	0.0	0.0	0.0	0.0	0.0	0.0	0.0	0.0	0.0	0.0	0.0	0.0	10.0	0.0	0.0	0.0	0.0	8.0	44.0	0.0	0.0	0.0	0.0	0.0	0.0	174.0	0.0	0.0	36.0	0.0	19.0	0.0	0.0	0.0	0.0	0.0
eaa59782aea65881fe0c1e64b3a2f7f9	k__Bacteria; p__Bacteroidetes; c__Bacteroidia; o__Bacteroidales; f__Rikenellaceae; g__Alistipes; s__onderdonkii	0.0	35.0	0.0	0.0	610.0	38.0	0.0	0.0	25.0	47.0	0.0	77.0	42.0	28.0	0.0	26.0	16.0	0.0	0.0	84.0	0.0	0.0	0.0	23.0	155.0	109.0	33.0	0.0	0.0	0.0	146.0	39.0	68.0	70.0	29.0	0.0	43.0	0.0	0.0	0.0	0.0	0.0	29.0	0.0	0.0	42.0	19.0	238.0
7658cfff3bd957edcdd6302b68132259	k__Bacteria; p__Firmicutes; c__Clostridia; o__Clostridiales; f__Lachnospiraceae; g__Lachnospira; s__	0.0	0.0	0.0	50.0	0.0	46.0	0.0	0.0	53.0	63.0	0.0	40.0	0.0	48.0	94.0	46.0	0.0	199.0	0.0	48.0	0.0	0.0	0.0	496.0	0.0	175.0	200.0	118.0	0.0	42.0	0.0	32.0	69.0	0.0	0.0	39.0	45.0	25.0	0.0	0.0	0.0	0.0	0.0	43.0	279.0	44.0	38.0	0.0
f6e2c835d9878253df9e46a6d13f6a7e	k__Bacteria; p__Firmicutes; c__Clostridia; o__Clostridiales; f__Ruminococcaceae; g__Oscillospira; s__	32.0	0.0	0.0	0.0	45.0	0.0	32.0	0.0	0.0	52.0	34.0	17.0	0.0	21.0	67.0	45.0	54.0	0.0	75.0	33.0	33.0	39.0	60.0	52.0	61.0	40.0	0.0	0.0	63.0	41.0	53.0	76.0	0.0	36.0	80.0	0.0	44.0	49.0	55.0	48.0	0.0	36.0	0.0	24.0	0.0	50.0	42.0	41.0
3838a25a82b80a3250cc55f76b2fcee1	k__Bacteria; p__Firmicutes; c__Clostridia; o__Clostridiales; f__Lachnospiraceae; g__[Ruminococcus]; s__	0.0	17.0	0.0	49.0	22.0	0.0	0.0	52.0	0.0	41.0	45.0	0.0	49.0	41.0	34.0	25.0	50.0	53.0	0.0	0.0	0.0	45.0	0.0	47.0	42.0	75.0	64.0	38.0	53.0	0.0	0.0	80.0	66.0	0.0	151.0	0.0	0.0	63.0	0.0	0.0	0.0	0.0	0.0	0.0	0.0	0.0	0.0	123.0
d24add0fcf98ebc155782c8d7cfaa1ad	k__Bacteria; p__Firmicutes; c__Clostridia; o__Clostridiales; f__Christensenellaceae; g__; s__	0.0	0.0	0.0	0.0	45.0	0.0	0.0	0.0	0.0	0.0	0.0	0.0	0.0	0.0	0.0	0.0	0.0	0.0	0.0	0.0	0.0	0.0	0.0	0.0	0.0	0.0	0.0	0.0	0.0	0.0	0.0	31.0	38.0	0.0	0.0	0.0	0.0	0.0	0.0	0.0	0.0	0.0	0.0	0.0	0.0	0.0	0.0	0.0
0be32c9347231e992c6913bca5bc136f	k__Bacteria; p__Firmicutes; c__Bacilli; o__Turicibacterales; f__Turicibacteraceae; g__Turicibacter; s__	0.0	32.0	27.0	0.0	45.0	0.0	0.0	23.0	0.0	0.0	0.0	0.0	0.0	0.0	0.0	0.0	0.0	0.0	0.0	0.0	0.0	0.0	0.0	0.0	0.0	0.0	0.0	30.0	0.0	0.0	54.0	0.0	0.0	47.0	484.0	0.0	41.0	0.0	0.0	0.0	38.0	0.0	0.0	40.0	0.0	0.0	0.0	16.0
484b59bf8671dec996d2ba7a9ce75861	k__Bacteria; p__Firmicutes; c__Clostridia; o__Clostridiales; f__Ruminococcaceae; g__Faecalibacterium; s__prausnitzii	32.0	31.0	0.0	0.0	0.0	0.0	0.0	0.0	0.0	0.0	0.0	0.0	0.0	85.0	0.0	0.0	0.0	308.0	0.0	0.0	0.0	0.0	0.0	0.0	0.0	0.0	133.0	0.0	0.0	130.0	0.0	0.0	0.0	0.0	0.0	211.0	0.0	0.0	149.0	0.0	0.0	0.0	0.0	0.0	0.0	0.0	0.0	0.0
6a8bc32bc36940e39fa7f56640faa33e	k__Bacteria; p__Bacteroidetes; c__Bacteroidia; o__Bacteroidales; f__Rikenellaceae; g__Alistipes; s__onderdonkii	0.0	49.0	0.0	0.0	942.0	57.0	0.0	0.0	41.0	59.0	0.0	62.0	28.0	27.0	0.0	0.0	16.0	24.0	0.0	65.0	0.0	0.0	0.0	23.0	169.0	72.0	30.0	0.0	0.0	0.0	117.0	34.0	76.0	71.0	24.0	0.0	59.0	0.0	0.0	0.0	0.0	33.0	29.0	0.0	0.0	27.0	15.0	222.0
76623314706795e9637583f757f917f2	k__Bacteria; p__Firmicutes; c__Clostridia; o__Clostridiales; f__Ruminococcaceae; g__Oscillospira; s__	0.0	0.0	0.0	0.0	0.0	0.0	0.0	0.0	0.0	0.0	0.0	33.0	0.0	0.0	0.0	0.0	0.0	0.0	0.0	0.0	0.0	0.0	0.0	0.0	0.0	0.0	0.0	0.0	0.0	0.0	0.0	0.0	0.0	0.0	0.0	0.0	0.0	0.0	0.0	0.0	0.0	0.0	0.0	0.0	0.0	0.0	0.0	32.0
967c4c4b09f46f72e9f4e2ea6114feda	k__Bacteria; p__Firmicutes; c__Clostridia; o__Clostridiales; f__Christensenellaceae; g__; s__	0.0	0.0	0.0	0.0	0.0	0.0	0.0	0.0	0.0	0.0	79.0	0.0	26.0	0.0	0.0	0.0	44.0	0.0	0.0	0.0	0.0	0.0	0.0	0.0	0.0	0.0	76.0	0.0	0.0	0.0	0.0	45.0	79.0	52.0	0.0	62.0	0.0	0.0	0.0	0.0	0.0	81.0	0.0	0.0	0.0	0.0	0.0	0.0
64f9ba79c19b6b3ced067934bcd49ee0	k__Bacteria; p__Actinobacteria; c__Coriobacteriia; o__Coriobacteriales; f__Coriobacteriaceae; g__Eggerthella; s__lenta	0.0	0.0	31.0	0.0	13.0	0.0	0.0	0.0	0.0	0.0	0.0	0.0	0.0	0.0	0.0	0.0	0.0	0.0	0.0	0.0	0.0	0.0	0.0	0.0	0.0	0.0	0.0	0.0	0.0	0.0	0.0	0.0	0.0	0.0	0.0	0.0	0.0	39.0	0.0	0.0	0.0	0.0	0.0	0.0	0.0	0.0	0.0	0.0
1f7727dd435fe7255c5eba63d6b033de	k__Bacteria; p__Bacteroidetes; c__Bacteroidia; o__Bacteroidales; f__Bacteroidaceae; g__Bacteroides; s__	0.0	84.0	0.0	254.0	0.0	0.0	0.0	21.0	179.0	11.0	21.0	0.0	0.0	0.0	171.0	315.0	0.0	0.0	0.0	0.0	4.0	0.0	0.0	102.0	660.0	116.0	0.0	0.0	0.0	0.0	0.0	19.0	0.0	31.0	0.0	0.0	0.0	0.0	12.0	0.0	0.0	0.0	423.0	0.0	26.0	111.0	0.0	22.0
7567fecbf156a86e61f5b754fc7ade43	k__Bacteria; p__Bacteroidetes; c__Bacteroidia; o__Bacteroidales; f__Bacteroidaceae; g__Bacteroides; s__	43.0	305.0	0.0	0.0	13.0	838.0	40.0	0.0	256.0	14.0	0.0	230.0	9.0	40.0	34.0	0.0	59.0	9.0	85.0	49.0	580.0	198.0	198.0	696.0	0.0	512.0	338.0	329.0	51.0	41.0	750.0	74.0	88.0	168.0	776.0	167.0	168.0	302.0	172.0	479.0	160.0	150.0	224.0	181.0	545.0	36.0	69.0	242.0
00f9ce14efb8c0e6dfaea8521f738414	k__Bacteria; p__Firmicutes; c__Clostridia; o__Clostridiales; f__Clostridiaceae; g__Clostridium	0.0	0.0	0.0	0.0	0.0	0.0	0.0	22.0	0.0	0.0	0.0	0.0	0.0	0.0	0.0	27.0	0.0	0.0	0.0	0.0	0.0	0.0	0.0	29.0	0.0	0.0	0.0	0.0	0.0	0.0	0.0	0.0	14.0	0.0	0.0	0.0	0.0	0.0	0.0	0.0	0.0	0.0	0.0	0.0	0.0	0.0	19.0	0.0
0e8bcb8eeb59251feea46397c4cc8232	k__Bacteria; p__Firmicutes; c__Clostridia; o__Clostridiales; f__Lachnospiraceae; g__Anaerostipes; s__	0.0	0.0	0.0	0.0	0.0	0.0	0.0	0.0	0.0	0.0	0.0	0.0	0.0	0.0	0.0	0.0	0.0	0.0	0.0	0.0	0.0	0.0	0.0	0.0	0.0	80.0	0.0	0.0	0.0	0.0	0.0	0.0	0.0	0.0	0.0	77.0	0.0	0.0	0.0	0.0	0.0	24.0	0.0	0.0	0.0	0.0	0.0	33.0
20f15d8d0fb45dd9bbb3545fc89dfdc5	k__Bacteria; p__Firmicutes; c__Clostridia; o__Clostridiales; f__Lachnospiraceae; g__Clostridium; s__lavalense	0.0	0.0	0.0	0.0	0.0	0.0	0.0	0.0	0.0	0.0	0.0	0.0	0.0	0.0	0.0	0.0	0.0	0.0	0.0	0.0	0.0	0.0	0.0	0.0	0.0	0.0	0.0	0.0	0.0	0.0	0.0	0.0	0.0	0.0	0.0	0.0	0.0	9.0	0.0	0.0	0.0	0.0	0.0	0.0	0.0	0.0	0.0	22.0
bc1c8214abd952c82c8e929905cbbc56	k__Bacteria; p__Bacteroidetes; c__Bacteroidia; o__Bacteroidales; f__Bacteroidaceae; g__Bacteroides; s__	0.0	75.0	0.0	0.0	0.0	0.0	0.0	0.0	132.0	46.0	22.0	0.0	0.0	0.0	74.0	0.0	24.0	0.0	105.0	0.0	0.0	0.0	0.0	0.0	0.0	225.0	20.0	0.0	0.0	0.0	0.0	0.0	0.0	0.0	0.0	0.0	0.0	173.0	51.0	0.0	0.0	15.0	0.0	97.0	52.0	0.0	0.0	0.0
962f4fdab79f1e1573419f07c946e769	k__Bacteria; p__Firmicutes; c__Clostridia; o__Clostridiales; f__Ruminococcaceae; g__Oscillospira; s__	0.0	44.0	0.0	0.0	0.0	77.0	0.0	0.0	0.0	70.0	38.0	47.0	170.0	0.0	0.0	0.0	44.0	17.0	0.0	42.0	0.0	0.0	54.0	0.0	0.0	0.0	32.0	0.0	25.0	67.0	0.0	63.0	36.0	36.0	100.0	73.0	210.0	188.0	47.0	0.0	0.0	37.0	0.0	0.0	0.0	0.0	43.0	0.0
4a8789183bf0429b3f4aef0ec8ea8c49	k__Bacteria; p__Firmicutes; c__Clostridia; o__Clostridiales; f__Ruminococcaceae; g__; s__	0.0	15.0	0.0	0.0	0.0	28.0	0.0	0.0	0.0	0.0	0.0	45.0	0.0	0.0	0.0	0.0	0.0	0.0	0.0	0.0	0.0	0.0	0.0	0.0	0.0	0.0	0.0	0.0	0.0	0.0	0.0	47.0	0.0	0.0	0.0	0.0	0.0	0.0	0.0	0.0	0.0	40.0	0.0	0.0	0.0	0.0	0.0	0.0
821282406de378db860dcfe3d855ea95	k__Bacteria; p__Firmicutes; c__Clostridia; o__Clostridiales; f__Lachnospiraceae; g__Roseburia	0.0	0.0	0.0	0.0	0.0	29.0	159.0	0.0	0.0	0.0	0.0	0.0	0.0	20.0	0.0	108.0	49.0	222.0	0.0	54.0	0.0	0.0	0.0	40.0	0.0	0.0	46.0	34.0	32.0	25.0	0.0	0.0	0.0	50.0	36.0	27.0	0.0	0.0	0.0	0.0	22.0	0.0	15.0	0.0	24.0	19.0	0.0	31.0
4576d62b47482e0c7476ff64b392ea55	k__Bacteria; p__Firmicutes; c__Clostridia; o__Clostridiales; f__Lachnospiraceae	0.0	0.0	0.0	0.0	0.0	0.0	69.0	18.0	0.0	36.0	0.0	83.0	0.0	0.0	0.0	32.0	0.0	85.0	0.0	54.0	0.0	0.0	0.0	9.0	0.0	28.0	69.0	0.0	0.0	53.0	20.0	0.0	0.0	79.0	149.0	46.0	0.0	0.0	0.0	0.0	0.0	0.0	0.0	0.0	29.0	0.0	0.0	0.0
ee77eca20466eed70d0c1ae0e51b1f80	k__Bacteria; p__Bacteroidetes; c__Bacteroidia; o__Bacteroidales; f__Bacteroidaceae; g__Bacteroides; s__	0.0	10.0	0.0	0.0	0.0	0.0	0.0	0.0	5.0	0.0	0.0	0.0	0.0	0.0	0.0	0.0	0.0	0.0	0.0	0.0	0.0	0.0	0.0	0.0	0.0	0.0	0.0	0.0	0.0	0.0	0.0	37.0	0.0	0.0	254.0	0.0	0.0	0.0	0.0	0.0	0.0	0.0	0.0	0.0	243.0	0.0	0.0	0.0
5b4525c3b2dd4441b67e3e8fd083b877	k__Bacteria; p__Firmicutes; c__Clostridia; o__Clostridiales; f__Ruminococcaceae; g__Gemmiger; s__formicilis	32.0	40.0	0.0	0.0	23.0	41.0	31.0	105.0	127.0	27.0	31.0	72.0	50.0	0.0	20.0	0.0	31.0	56.0	205.0	154.0	0.0	22.0	0.0	58.0	17.0	648.0	39.0	33.0	48.0	16.0	52.0	18.0	0.0	0.0	86.0	0.0	36.0	25.0	29.0	0.0	51.0	0.0	142.0	19.0	62.0	0.0	0.0	0.0
8f23ca046d9de6e9e987787b317a077b	k__Bacteria; p__Proteobacteria; c__Deltaproteobacteria; o__Desulfovibrionales; f__Desulfovibrionaceae; g__Bilophila; s__	15.0	0.0	0.0	0.0	0.0	0.0	0.0	0.0	0.0	0.0	0.0	0.0	0.0	0.0	0.0	0.0	0.0	0.0	0.0	0.0	0.0	0.0	0.0	61.0	0.0	71.0	0.0	0.0	20.0	0.0	0.0	0.0	0.0	0.0	0.0	0.0	25.0	0.0	63.0	0.0	0.0	0.0	41.0	0.0	0.0	53.0	0.0	0.0
90baff9dc7270f7cd8e3bcf54138073b	k__Bacteria; p__Firmicutes; c__Clostridia; o__Clostridiales; f__Veillonellaceae; g__Veillonella; s__dispar	0.0	0.0	0.0	6.0	0.0	0.0	16.0	0.0	0.0	0.0	0.0	0.0	0.0	0.0	5.0	0.0	0.0	0.0	0.0	12.0	0.0	0.0	20.0	0.0	0.0	0.0	0.0	0.0	0.0	0.0	0.0	0.0	0.0	0.0	0.0	0.0	0.0	0.0	0.0	0.0	0.0	0.0	11.0	0.0	0.0	0.0	0.0	21.0
bd49ca832e1bd26364396ca478ad384f	k__Bacteria; p__Firmicutes; c__Erysipelotrichi; o__Erysipelotrichales; f__Erysipelotrichaceae; g__[Eubacterium]; s__biforme	0.0	0.0	0.0	0.0	0.0	0.0	0.0	0.0	0.0	22.0	0.0	0.0	0.0	0.0	0.0	0.0	0.0	0.0	0.0	0.0	0.0	0.0	0.0	0.0	0.0	0.0	48.0	0.0	0.0	0.0	0.0	0.0	0.0	0.0	0.0	0.0	0.0	0.0	0.0	0.0	0.0	51.0	0.0	28.0	0.0	0.0	0.0	0.0
50824268d9adedddf1431cca0cdf9c9d	k__Bacteria; p__Firmicutes; c__Bacilli; o__Lactobacillales; f__Enterococcaceae; g__Enterococcus; s__	0.0	0.0	0.0	0.0	20.0	10.0	0.0	0.0	0.0	0.0	0.0	0.0	0.0	0.0	0.0	0.0	0.0	0.0	0.0	0.0	0.0	0.0	0.0	0.0	0.0	0.0	0.0	3.0	0.0	0.0	0.0	0.0	0.0	0.0	0.0	0.0	0.0	0.0	0.0	0.0	27.0	0.0	0.0	0.0	0.0	0.0	0.0	0.0
beac93d6b9b0061ca72c419f8e87a009	k__Bacteria; p__Firmicutes; c__Clostridia; o__Clostridiales; f__Lachnospiraceae; g__; s__	0.0	0.0	0.0	8.0	0.0	0.0	0.0	9.0	0.0	0.0	0.0	18.0	0.0	0.0	25.0	0.0	33.0	0.0	0.0	44.0	0.0	0.0	0.0	0.0	0.0	0.0	0.0	0.0	0.0	0.0	0.0	0.0	0.0	0.0	29.0	5.0	0.0	0.0	0.0	267.0	0.0	24.0	29.0	0.0	0.0	0.0	0.0	11.0
245cdf849bca7693d4b0c4069ef6488b	k__Bacteria; p__Bacteroidetes; c__Bacteroidia; o__Bacteroidales; f__Bacteroidaceae; g__Bacteroides; s__ovatus	0.0	0.0	0.0	26.0	0.0	0.0	0.0	0.0	11.0	0.0	0.0	0.0	0.0	0.0	0.0	0.0	0.0	35.0	0.0	12.0	0.0	0.0	0.0	0.0	0.0	16.0	8.0	17.0	0.0	0.0	0.0	0.0	0.0	0.0	236.0	17.0	10.0	0.0	0.0	0.0	0.0	0.0	36.0	0.0	25.0	0.0	0.0	0.0
78dd9454333310c796f267376f215efa	k__Bacteria; p__Firmicutes; c__Clostridia; o__Clostridiales; f__Ruminococcaceae	0.0	0.0	0.0	0.0	0.0	0.0	0.0	0.0	0.0	43.0	4.0	0.0	0.0	0.0	0.0	0.0	0.0	0.0	0.0	0.0	0.0	0.0	0.0	0.0	0.0	0.0	0.0	0.0	0.0	0.0	0.0	0.0	0.0	0.0	17.0	45.0	0.0	33.0	52.0	0.0	0.0	0.0	0.0	0.0	0.0	0.0	0.0	0.0
4bdb15e58c169cef41dea58d1e524a06	k__Bacteria; p__Firmicutes; c__Clostridia; o__Clostridiales; f__Christensenellaceae; g__; s__	0.0	0.0	0.0	0.0	0.0	30.0	0.0	0.0	0.0	0.0	0.0	0.0	0.0	0.0	0.0	0.0	0.0	0.0	0.0	38.0	0.0	0.0	0.0	0.0	0.0	0.0	0.0	0.0	0.0	17.0	0.0	0.0	0.0	0.0	18.0	0.0	0.0	0.0	0.0	0.0	0.0	13.0	0.0	0.0	0.0	0.0	0.0	0.0
0d6ee38bc24eff3ff0cfe8f94aca634d	k__Bacteria; p__Bacteroidetes; c__Bacteroidia; o__Bacteroidales; f__Bacteroidaceae; g__Bacteroides; s__ovatus	0.0	0.0	0.0	0.0	0.0	0.0	0.0	0.0	0.0	0.0	0.0	35.0	0.0	0.0	29.0	0.0	0.0	0.0	0.0	0.0	51.0	61.0	0.0	0.0	60.0	0.0	0.0	0.0	0.0	0.0	43.0	0.0	0.0	0.0	0.0	0.0	0.0	0.0	0.0	75.0	0.0	0.0	0.0	0.0	0.0	0.0	0.0	0.0
999b5152525cd1c4b5074e9888ee3b12	k__Bacteria; p__Proteobacteria; c__Betaproteobacteria; o__Burkholderiales; f__Alcaligenaceae; g__Sutterella; s__	0.0	0.0	0.0	0.0	0.0	0.0	0.0	0.0	0.0	0.0	0.0	0.0	0.0	0.0	0.0	0.0	0.0	0.0	44.0	5.0	0.0	0.0	0.0	0.0	124.0	0.0	0.0	0.0	0.0	0.0	170.0	0.0	0.0	0.0	0.0	0.0	0.0	0.0	0.0	25.0	0.0	0.0	0.0	0.0	0.0	63.0	0.0	0.0
11a10484e8e6d6396218f7e8548a9272	k__Bacteria; p__Firmicutes; c__Clostridia; o__Clostridiales; f__Ruminococcaceae	0.0	0.0	0.0	0.0	0.0	14.0	0.0	0.0	0.0	0.0	0.0	0.0	0.0	0.0	0.0	0.0	16.0	0.0	0.0	0.0	0.0	0.0	0.0	0.0	0.0	0.0	0.0	0.0	0.0	0.0	19.0	0.0	41.0	0.0	0.0	0.0	0.0	0.0	0.0	0.0	0.0	0.0	0.0	0.0	0.0	0.0	0.0	0.0
ad7b0af63abcc0ae804edea9a4564687	k__Bacteria; p__Bacteroidetes; c__Bacteroidia; o__Bacteroidales; f__Bacteroidaceae; g__Bacteroides; s__	0.0	0.0	0.0	0.0	0.0	0.0	309.0	0.0	0.0	0.0	0.0	0.0	0.0	0.0	0.0	0.0	0.0	0.0	0.0	0.0	0.0	0.0	0.0	0.0	0.0	0.0	0.0	0.0	46.0	167.0	0.0	0.0	0.0	0.0	0.0	44.0	0.0	0.0	0.0	0.0	0.0	0.0	0.0	0.0	0.0	0.0	0.0	0.0
05217d242e9d2396473a683298be3bb6	k__Bacteria; p__Bacteroidetes; c__Bacteroidia; o__Bacteroidales; f__Bacteroidaceae; g__Bacteroides; s__	0.0	20.0	0.0	0.0	0.0	0.0	42.0	56.0	0.0	0.0	0.0	0.0	27.0	0.0	0.0	9.0	32.0	53.0	53.0	374.0	0.0	13.0	0.0	74.0	0.0	0.0	41.0	67.0	0.0	0.0	0.0	0.0	113.0	0.0	0.0	0.0	73.0	0.0	71.0	0.0	0.0	163.0	312.0	127.0	0.0	0.0	110.0	0.0
0da5097a4bd574ac0772e81d4e107a1c	k__Bacteria; p__Firmicutes; c__Erysipelotrichi; o__Erysipelotrichales; f__Erysipelotrichaceae; g__Clostridium; s__ramosum	0.0	0.0	33.0	0.0	28.0	0.0	0.0	0.0	0.0	0.0	0.0	0.0	0.0	0.0	0.0	0.0	0.0	0.0	0.0	0.0	0.0	0.0	0.0	0.0	0.0	0.0	0.0	0.0	0.0	0.0	0.0	0.0	0.0	0.0	0.0	0.0	0.0	34.0	0.0	0.0	33.0	0.0	0.0	0.0	0.0	0.0	0.0	0.0
75ecf6168470acedfa05382f6f7afb42	k__Bacteria; p__Firmicutes; c__Clostridia; o__Clostridiales; f__Ruminococcaceae; g__Oscillospira	0.0	0.0	0.0	0.0	0.0	0.0	0.0	0.0	0.0	17.0	0.0	0.0	0.0	0.0	0.0	0.0	0.0	0.0	0.0	0.0	0.0	0.0	0.0	0.0	0.0	0.0	0.0	0.0	0.0	0.0	0.0	53.0	0.0	0.0	0.0	0.0	0.0	0.0	0.0	0.0	0.0	0.0	0.0	0.0	0.0	0.0	0.0	0.0
a05623d7047294b6d76e3fd435212732	k__Bacteria; p__Firmicutes; c__Clostridia; o__Clostridiales; f__Ruminococcaceae; g__Ruminococcus; s__bromii	0.0	38.0	0.0	0.0	0.0	25.0	0.0	0.0	160.0	67.0	30.0	30.0	0.0	0.0	0.0	0.0	0.0	17.0	6.0	80.0	141.0	0.0	0.0	66.0	66.0	0.0	19.0	0.0	0.0	0.0	0.0	0.0	0.0	23.0	0.0	0.0	13.0	343.0	0.0	0.0	37.0	0.0	0.0	48.0	0.0	0.0	0.0	0.0
99de33c3af1c7aadf79360fb10c2e59a	k__Bacteria; p__Firmicutes; c__Bacilli; o__Lactobacillales; f__Streptococcaceae; g__Streptococcus; s__	0.0	0.0	14.0	21.0	0.0	26.0	25.0	16.0	78.0	0.0	0.0	0.0	0.0	0.0	0.0	0.0	0.0	0.0	0.0	0.0	23.0	0.0	0.0	0.0	0.0	0.0	0.0	0.0	0.0	0.0	0.0	32.0	0.0	0.0	0.0	0.0	0.0	140.0	0.0	0.0	275.0	29.0	18.0	0.0	25.0	0.0	0.0	92.0
08bb7bf9987a8437a68f7dfc530ccddd	k__Bacteria; p__Firmicutes; c__Clostridia; o__Clostridiales; f__Ruminococcaceae; g__Ruminococcus; s__	0.0	0.0	0.0	0.0	0.0	16.0	0.0	16.0	0.0	45.0	0.0	0.0	0.0	0.0	0.0	0.0	0.0	0.0	0.0	0.0	0.0	0.0	0.0	0.0	0.0	0.0	0.0	0.0	0.0	0.0	0.0	0.0	0.0	14.0	18.0	0.0	0.0	45.0	0.0	0.0	0.0	0.0	0.0	0.0	0.0	0.0	0.0	0.0
acf03a03fec6aae9eba8a1af8070324e	k__Bacteria; p__Firmicutes; c__Clostridia; o__Clostridiales; f__Lachnospiraceae; g__; s__	0.0	0.0	0.0	0.0	0.0	0.0	0.0	0.0	0.0	0.0	0.0	20.0	0.0	0.0	0.0	0.0	0.0	0.0	0.0	0.0	0.0	0.0	0.0	28.0	0.0	0.0	22.0	0.0	0.0	0.0	0.0	0.0	0.0	0.0	0.0	0.0	0.0	0.0	0.0	0.0	0.0	0.0	0.0	0.0	0.0	0.0	0.0	38.0
49359eede0aa666d33912df5ef59302f	k__Bacteria; p__Firmicutes; c__Clostridia; o__Clostridiales; f__Veillonellaceae; g__Veillonella; s__dispar	0.0	0.0	0.0	4.0	0.0	0.0	0.0	0.0	0.0	0.0	0.0	0.0	0.0	0.0	9.0	0.0	0.0	0.0	0.0	0.0	0.0	0.0	8.0	0.0	0.0	0.0	0.0	0.0	0.0	0.0	0.0	0.0	0.0	0.0	0.0	0.0	0.0	0.0	0.0	0.0	0.0	0.0	4.0	0.0	0.0	0.0	0.0	25.0
c3afcf3cc25cc4b19484540c99468c47	k__Bacteria; p__Firmicutes; c__Clostridia; o__Clostridiales; f__Clostridiaceae; g__Clostridium; s__perfringens	0.0	0.0	0.0	0.0	0.0	0.0	0.0	0.0	0.0	0.0	0.0	0.0	0.0	0.0	0.0	0.0	0.0	0.0	0.0	0.0	0.0	0.0	0.0	0.0	0.0	0.0	0.0	49.0	0.0	0.0	0.0	0.0	0.0	0.0	0.0	0.0	0.0	0.0	0.0	0.0	83.0	0.0	0.0	0.0	0.0	0.0	0.0	0.0
aff3550b9d4f77759ebe72ab6d6a0716	k__Bacteria; p__Firmicutes; c__Clostridia; o__Clostridiales; f__Ruminococcaceae; g__Ruminococcus; s__	0.0	0.0	0.0	0.0	0.0	0.0	24.0	0.0	0.0	34.0	0.0	29.0	0.0	0.0	0.0	0.0	0.0	0.0	0.0	0.0	0.0	0.0	15.0	0.0	0.0	0.0	0.0	0.0	0.0	0.0	0.0	0.0	0.0	0.0	69.0	0.0	0.0	18.0	0.0	0.0	0.0	0.0	0.0	0.0	0.0	64.0	0.0	0.0
54eaed3bff5c8049c0fd0a834bef37b9	k__Bacteria; p__Proteobacteria; c__Gammaproteobacteria; o__Pasteurellales; f__Pasteurellaceae; g__Haemophilus; s__parainfluenzae	0.0	0.0	0.0	0.0	0.0	0.0	0.0	0.0	27.0	0.0	0.0	0.0	0.0	0.0	0.0	0.0	0.0	0.0	0.0	0.0	0.0	0.0	0.0	0.0	0.0	34.0	0.0	36.0	0.0	0.0	0.0	0.0	0.0	0.0	0.0	0.0	15.0	0.0	0.0	0.0	0.0	0.0	0.0	0.0	164.0	0.0	46.0	221.0
b627b1e8ad5f76d56c169e363c9cd5dd	k__Bacteria; p__Bacteroidetes; c__Bacteroidia; o__Bacteroidales; f__Bacteroidaceae; g__Bacteroides; s__	53.0	219.0	6.0	0.0	14.0	654.0	18.0	0.0	275.0	13.0	0.0	157.0	4.0	24.0	21.0	11.0	48.0	14.0	61.0	68.0	469.0	110.0	206.0	561.0	0.0	428.0	316.0	193.0	25.0	26.0	632.0	62.0	70.0	130.0	773.0	109.0	127.0	260.0	111.0	328.0	97.0	157.0	220.0	143.0	430.0	24.0	77.0	157.0
818e8225f7abe36ba20133bd1caa11ae	k__Bacteria; p__Firmicutes; c__Clostridia; o__Clostridiales; f__Lachnospiraceae; g__Blautia; s__	0.0	51.0	0.0	36.0	73.0	0.0	35.0	70.0	64.0	36.0	0.0	61.0	36.0	11.0	0.0	67.0	53.0	0.0	39.0	0.0	0.0	0.0	49.0	37.0	57.0	24.0	27.0	0.0	0.0	40.0	63.0	0.0	0.0	0.0	54.0	40.0	43.0	50.0	55.0	68.0	34.0	56.0	34.0	0.0	0.0	0.0	23.0	47.0
b3397142e3b1ff67784c1fe458be73e9	k__Bacteria; p__Actinobacteria; c__Coriobacteriia; o__Coriobacteriales; f__Coriobacteriaceae; g__; s__	0.0	0.0	0.0	0.0	0.0	66.0	0.0	0.0	0.0	0.0	0.0	0.0	36.0	21.0	0.0	0.0	0.0	0.0	0.0	0.0	0.0	0.0	0.0	0.0	0.0	0.0	0.0	0.0	0.0	0.0	0.0	0.0	0.0	0.0	0.0	0.0	0.0	0.0	0.0	0.0	0.0	0.0	0.0	0.0	0.0	0.0	41.0	0.0
642b341b3537b15cac926db00f4ebdfa	k__Bacteria; p__Firmicutes; c__Clostridia; o__Clostridiales; f__Ruminococcaceae; g__Oscillospira; s__	0.0	37.0	0.0	0.0	51.0	24.0	48.0	29.0	0.0	48.0	0.0	0.0	0.0	35.0	0.0	97.0	0.0	0.0	40.0	0.0	0.0	0.0	0.0	0.0	0.0	31.0	0.0	0.0	0.0	0.0	53.0	0.0	0.0	0.0	23.0	0.0	0.0	40.0	0.0	0.0	0.0	40.0	0.0	0.0	0.0	83.0	0.0	0.0
521dd03b3185872ed935aa124cc688c9	k__Bacteria; p__Firmicutes; c__Clostridia; o__Clostridiales; f__Lachnospiraceae; g__; s__	23.0	0.0	0.0	54.0	0.0	5.0	36.0	0.0	0.0	0.0	47.0	98.0	0.0	60.0	33.0	0.0	0.0	27.0	0.0	31.0	331.0	67.0	55.0	142.0	30.0	0.0	42.0	39.0	0.0	42.0	33.0	74.0	0.0	48.0	36.0	0.0	0.0	0.0	0.0	41.0	0.0	0.0	67.0	30.0	54.0	41.0	0.0	61.0
ed2098e5d98edcfaccaab1ca6480e3ef	k__Bacteria; p__Firmicutes; c__Clostridia; o__Clostridiales; f__Lachnospiraceae	0.0	0.0	0.0	0.0	0.0	0.0	0.0	0.0	0.0	0.0	0.0	0.0	0.0	0.0	0.0	28.0	0.0	0.0	0.0	0.0	0.0	41.0	0.0	0.0	0.0	0.0	0.0	0.0	0.0	0.0	0.0	0.0	0.0	0.0	0.0	0.0	0.0	0.0	0.0	0.0	35.0	0.0	0.0	0.0	0.0	0.0	0.0	0.0
871ad6d768b02c38a5e9285685b9c099	k__Bacteria; p__Firmicutes; c__Clostridia; o__Clostridiales; f__Ruminococcaceae; g__Butyricicoccus; s__pullicaecorum	0.0	0.0	0.0	0.0	0.0	0.0	0.0	26.0	0.0	13.0	0.0	0.0	0.0	51.0	0.0	0.0	0.0	0.0	71.0	0.0	0.0	0.0	0.0	25.0	0.0	0.0	0.0	0.0	0.0	0.0	0.0	0.0	0.0	0.0	26.0	0.0	0.0	0.0	0.0	0.0	0.0	0.0	0.0	0.0	0.0	0.0	0.0	57.0
dd93d0f4bbec946bb9c744f8603c9ba9	k__Bacteria; p__Firmicutes; c__Clostridia; o__Clostridiales; f__; g__; s__	0.0	0.0	0.0	0.0	0.0	0.0	0.0	0.0	0.0	0.0	81.0	0.0	20.0	27.0	26.0	0.0	0.0	0.0	0.0	0.0	0.0	0.0	0.0	42.0	0.0	0.0	25.0	0.0	0.0	0.0	0.0	0.0	0.0	0.0	49.0	0.0	28.0	0.0	0.0	0.0	0.0	32.0	49.0	0.0	0.0	0.0	0.0	0.0
5ef13b55d52fef776a5d3541efbebb87	k__Bacteria; p__Actinobacteria; c__Actinobacteria; o__Bifidobacteriales; f__Bifidobacteriaceae; g__Bifidobacterium; s__	0.0	0.0	266.0	0.0	0.0	0.0	46.0	0.0	0.0	0.0	0.0	54.0	0.0	0.0	0.0	0.0	0.0	0.0	0.0	0.0	0.0	0.0	0.0	0.0	0.0	0.0	29.0	101.0	0.0	0.0	0.0	0.0	0.0	0.0	0.0	0.0	0.0	0.0	0.0	0.0	0.0	0.0	94.0	0.0	0.0	0.0	0.0	0.0
d797ef0fc6d26be7d83d866c1c8cfb06	k__Bacteria; p__Firmicutes; c__Clostridia; o__Clostridiales; f__Lachnospiraceae; g__Coprococcus; s__catus	0.0	0.0	0.0	0.0	0.0	0.0	0.0	0.0	0.0	62.0	0.0	38.0	29.0	19.0	15.0	0.0	0.0	0.0	35.0	25.0	0.0	0.0	0.0	0.0	56.0	0.0	0.0	0.0	0.0	0.0	0.0	13.0	0.0	0.0	57.0	0.0	0.0	0.0	0.0	20.0	0.0	45.0	52.0	0.0	0.0	0.0	0.0	22.0
4aed34cb48260a7f16662e65d544ec02	k__Bacteria; p__Firmicutes; c__Clostridia; o__Clostridiales; f__Lachnospiraceae; g__Blautia; s__obeum	0.0	32.0	0.0	0.0	0.0	38.0	0.0	0.0	23.0	38.0	0.0	0.0	0.0	0.0	0.0	42.0	0.0	33.0	54.0	0.0	0.0	0.0	0.0	0.0	0.0	0.0	0.0	0.0	47.0	0.0	65.0	29.0	0.0	0.0	22.0	25.0	9.0	45.0	0.0	0.0	0.0	20.0	40.0	0.0	0.0	0.0	0.0	70.0
0997f31cba78221245fe1c05e20ca5f1	k__Bacteria; p__Bacteroidetes; c__Bacteroidia; o__Bacteroidales; f__Rikenellaceae; g__Alistipes; s__finegoldii	0.0	0.0	0.0	0.0	0.0	0.0	0.0	0.0	0.0	0.0	31.0	0.0	0.0	0.0	0.0	0.0	0.0	0.0	0.0	0.0	0.0	0.0	0.0	0.0	0.0	0.0	0.0	0.0	0.0	0.0	57.0	26.0	0.0	15.0	43.0	0.0	33.0	106.0	0.0	0.0	0.0	0.0	0.0	0.0	0.0	0.0	0.0	0.0
6d83dfacdad1ee1d761fd2ada51ffbae	k__Bacteria; p__Firmicutes; c__Clostridia; o__Clostridiales; f__; g__; s__	0.0	0.0	0.0	0.0	0.0	0.0	0.0	0.0	0.0	0.0	0.0	0.0	0.0	0.0	0.0	0.0	0.0	0.0	0.0	0.0	0.0	0.0	0.0	0.0	0.0	0.0	0.0	0.0	0.0	0.0	78.0	0.0	0.0	84.0	45.0	0.0	0.0	7.0	0.0	0.0	0.0	0.0	0.0	0.0	0.0	0.0	0.0	0.0
7b360fe8ebf0ae7ee4edf3abeb87cfa2	k__Bacteria; p__Firmicutes; c__Erysipelotrichi; o__Erysipelotrichales; f__Erysipelotrichaceae; g__; s__	0.0	17.0	0.0	31.0	0.0	51.0	75.0	0.0	0.0	108.0	0.0	60.0	0.0	0.0	54.0	40.0	37.0	0.0	0.0	21.0	36.0	0.0	33.0	55.0	87.0	54.0	37.0	0.0	35.0	59.0	50.0	0.0	4.0	0.0	113.0	48.0	31.0	0.0	26.0	35.0	0.0	17.0	43.0	25.0	0.0	30.0	0.0	45.0
2069b3c147e18466580d20db50c96e9c	k__Bacteria; p__Firmicutes; c__Clostridia; o__Clostridiales; f__Ruminococcaceae; g__; s__	0.0	137.0	0.0	0.0	0.0	0.0	0.0	0.0	0.0	0.0	65.0	0.0	0.0	0.0	0.0	0.0	0.0	0.0	0.0	0.0	0.0	0.0	0.0	0.0	0.0	0.0	0.0	0.0	63.0	0.0	0.0	45.0	45.0	43.0	57.0	31.0	0.0	38.0	0.0	0.0	0.0	55.0	0.0	0.0	28.0	0.0	0.0	0.0
636168b58d79b67e775b9e183caed2da	k__Bacteria; p__Firmicutes; c__Clostridia; o__Clostridiales; f__; g__; s__	0.0	0.0	0.0	0.0	0.0	16.0	0.0	0.0	0.0	0.0	0.0	0.0	0.0	0.0	0.0	0.0	0.0	0.0	0.0	0.0	0.0	0.0	0.0	0.0	0.0	0.0	31.0	0.0	0.0	0.0	0.0	36.0	0.0	0.0	0.0	45.0	0.0	0.0	78.0	34.0	0.0	0.0	0.0	0.0	0.0	0.0	0.0	0.0
0a40fa5cf22dee6de570b14b229f883d	k__Bacteria; p__Firmicutes; c__Clostridia; o__Clostridiales; f__Lachnospiraceae	0.0	0.0	0.0	0.0	0.0	0.0	0.0	15.0	0.0	59.0	0.0	64.0	61.0	0.0	0.0	31.0	0.0	0.0	0.0	106.0	0.0	35.0	0.0	0.0	0.0	39.0	0.0	0.0	0.0	0.0	8.0	0.0	0.0	0.0	70.0	46.0	0.0	0.0	0.0	0.0	0.0	0.0	0.0	0.0	0.0	0.0	0.0	0.0
e5ad88549b67b2c55f154f00f5cf0c4f	k__Bacteria; p__Firmicutes; c__Clostridia; o__Clostridiales; f__Lachnospiraceae; g__Coprococcus; s__	0.0	0.0	0.0	0.0	0.0	0.0	0.0	0.0	0.0	0.0	33.0	0.0	0.0	131.0	0.0	62.0	0.0	45.0	0.0	0.0	0.0	0.0	0.0	0.0	0.0	37.0	121.0	0.0	0.0	0.0	0.0	0.0	0.0	0.0	0.0	130.0	0.0	0.0	0.0	0.0	0.0	0.0	0.0	0.0	0.0	0.0	0.0	0.0
c5a12a7954bd35f71bab0a0e976b3939	k__Bacteria; p__Firmicutes; c__Clostridia; o__Clostridiales	0.0	0.0	0.0	0.0	0.0	45.0	0.0	0.0	0.0	0.0	0.0	47.0	0.0	0.0	0.0	0.0	0.0	0.0	0.0	0.0	0.0	0.0	0.0	0.0	0.0	0.0	0.0	0.0	49.0	0.0	0.0	0.0	0.0	0.0	87.0	0.0	0.0	0.0	0.0	0.0	0.0	50.0	0.0	0.0	0.0	0.0	0.0	0.0
086c8a0d567df55348713a9408d817fe	k__Bacteria; p__Firmicutes; c__Clostridia; o__Clostridiales; f__Lachnospiraceae	0.0	49.0	0.0	0.0	0.0	0.0	0.0	0.0	0.0	0.0	0.0	0.0	0.0	0.0	0.0	0.0	0.0	71.0	0.0	50.0	0.0	0.0	16.0	0.0	0.0	0.0	0.0	0.0	0.0	0.0	0.0	0.0	0.0	0.0	0.0	32.0	0.0	0.0	0.0	0.0	0.0	0.0	0.0	0.0	0.0	0.0	0.0	17.0
cbd2f698c4e85f8d4a08c8de77c73a8d	k__Bacteria; p__Firmicutes; c__Clostridia; o__Clostridiales; f__Lachnospiraceae; g__; s__	29.0	130.0	0.0	0.0	0.0	312.0	0.0	0.0	0.0	180.0	0.0	27.0	31.0	113.0	36.0	0.0	47.0	80.0	0.0	295.0	0.0	36.0	50.0	0.0	0.0	73.0	118.0	0.0	41.0	0.0	21.0	49.0	0.0	189.0	0.0	56.0	31.0	31.0	202.0	0.0	0.0	0.0	0.0	0.0	0.0	0.0	32.0	0.0
38c8567c0cda66072c4e8efd33bd27ad	k__Bacteria; p__Firmicutes; c__Clostridia; o__Clostridiales; f__Lachnospiraceae	0.0	0.0	0.0	0.0	0.0	20.0	0.0	0.0	12.0	0.0	0.0	65.0	0.0	0.0	0.0	0.0	41.0	0.0	0.0	0.0	0.0	0.0	0.0	0.0	0.0	63.0	0.0	0.0	0.0	0.0	0.0	0.0	41.0	0.0	0.0	26.0	0.0	0.0	47.0	0.0	0.0	0.0	21.0	0.0	36.0	0.0	0.0	0.0
e3aafffdcd03b2dac092531eb7660bdd	k__Bacteria; p__Firmicutes; c__Clostridia; o__Clostridiales; f__Lachnospiraceae; g__Lachnospira; s__	0.0	69.0	0.0	21.0	0.0	36.0	0.0	0.0	0.0	20.0	0.0	0.0	0.0	0.0	0.0	0.0	0.0	152.0	0.0	0.0	0.0	102.0	53.0	0.0	39.0	138.0	29.0	0.0	0.0	40.0	109.0	39.0	0.0	0.0	47.0	98.0	0.0	0.0	16.0	231.0	0.0	32.0	47.0	26.0	182.0	0.0	43.0	31.0
24e7fe2516e0451db80957f42e5e2196	k__Bacteria; p__Firmicutes; c__Clostridia; o__Clostridiales; f__Ruminococcaceae; g__Ruminococcus; s__	0.0	0.0	0.0	0.0	0.0	0.0	0.0	0.0	0.0	0.0	0.0	0.0	0.0	0.0	0.0	0.0	0.0	0.0	0.0	0.0	0.0	0.0	0.0	0.0	0.0	0.0	0.0	0.0	0.0	0.0	0.0	0.0	42.0	0.0	0.0	0.0	0.0	32.0	48.0	7.0	0.0	46.0	0.0	0.0	0.0	0.0	0.0	0.0
1a4cafa9c402b729118f8b79e5952387	k__Bacteria; p__Proteobacteria; c__Deltaproteobacteria; o__Desulfovibrionales; f__Desulfovibrionaceae; g__Desulfovibrio; s__	0.0	0.0	0.0	0.0	0.0	0.0	0.0	0.0	0.0	0.0	0.0	0.0	0.0	0.0	0.0	0.0	0.0	53.0	0.0	0.0	0.0	0.0	0.0	0.0	0.0	0.0	0.0	0.0	0.0	0.0	0.0	0.0	0.0	0.0	253.0	0.0	0.0	0.0	0.0	0.0	0.0	0.0	0.0	0.0	0.0	0.0	68.0	0.0
abce5af6feb97162b0e2f84e21bb881a	k__Bacteria; p__Bacteroidetes; c__Bacteroidia; o__Bacteroidales; f__Rikenellaceae; g__Alistipes; s__finegoldii	0.0	0.0	0.0	0.0	72.0	0.0	0.0	0.0	0.0	0.0	0.0	0.0	21.0	29.0	0.0	47.0	0.0	0.0	0.0	0.0	0.0	20.0	240.0	0.0	0.0	69.0	20.0	0.0	0.0	42.0	0.0	42.0	0.0	0.0	0.0	0.0	0.0	0.0	0.0	0.0	0.0	0.0	0.0	0.0	0.0	0.0	0.0	0.0
d9c6d0c31ae9972ac4db7b8cc9d960fb	k__Bacteria; p__Firmicutes; c__Clostridia; o__Clostridiales; f__Ruminococcaceae; g__Butyricicoccus; s__pullicaecorum	0.0	0.0	0.0	0.0	0.0	0.0	23.0	0.0	0.0	32.0	0.0	0.0	0.0	0.0	0.0	0.0	0.0	0.0	0.0	0.0	0.0	0.0	0.0	17.0	0.0	0.0	0.0	0.0	0.0	0.0	0.0	0.0	0.0	0.0	23.0	0.0	0.0	0.0	0.0	0.0	0.0	0.0	0.0	0.0	0.0	0.0	0.0	51.0
9b1b3ee4448ba2f58b968a488d9088a2	k__Bacteria; p__Firmicutes; c__Clostridia; o__Clostridiales; f__Ruminococcaceae	0.0	0.0	0.0	0.0	38.0	0.0	0.0	0.0	0.0	0.0	0.0	0.0	0.0	0.0	0.0	0.0	0.0	0.0	0.0	0.0	0.0	0.0	0.0	0.0	11.0	0.0	0.0	0.0	0.0	0.0	0.0	0.0	45.0	27.0	0.0	0.0	10.0	29.0	0.0	55.0	0.0	103.0	0.0	0.0	0.0	0.0	0.0	0.0
cbc9e06817a653611fd320ed0dbfc8c8	k__Bacteria; p__Bacteroidetes; c__Bacteroidia; o__Bacteroidales; f__[Odoribacteraceae]; g__Odoribacter; s__	0.0	30.0	0.0	0.0	62.0	35.0	0.0	38.0	33.0	58.0	0.0	16.0	0.0	19.0	19.0	0.0	0.0	35.0	0.0	35.0	0.0	12.0	0.0	0.0	0.0	0.0	0.0	0.0	29.0	0.0	0.0	0.0	0.0	33.0	29.0	27.0	20.0	0.0	44.0	15.0	0.0	15.0	10.0	29.0	0.0	0.0	16.0	0.0
327251dbc588a518691238f93ba418da	k__Bacteria; p__Bacteroidetes; c__Bacteroidia; o__Bacteroidales; f__Bacteroidaceae; g__Bacteroides; s__	0.0	0.0	0.0	0.0	0.0	0.0	0.0	0.0	0.0	0.0	0.0	0.0	0.0	0.0	0.0	0.0	0.0	0.0	0.0	0.0	0.0	0.0	0.0	77.0	0.0	0.0	91.0	0.0	0.0	18.0	0.0	0.0	0.0	0.0	0.0	0.0	0.0	0.0	0.0	428.0	0.0	0.0	0.0	122.0	155.0	0.0	0.0	0.0
33b4a4f7072a3e4a66ae4aac65af990a	k__Bacteria; p__Firmicutes; c__Clostridia; o__Clostridiales; f__Ruminococcaceae; g__Ruminococcus; s__	0.0	0.0	0.0	0.0	0.0	15.0	0.0	10.0	0.0	0.0	0.0	35.0	0.0	0.0	0.0	0.0	0.0	0.0	0.0	0.0	0.0	0.0	0.0	0.0	0.0	0.0	0.0	0.0	26.0	0.0	0.0	0.0	0.0	0.0	22.0	0.0	0.0	38.0	0.0	0.0	0.0	0.0	0.0	0.0	13.0	0.0	0.0	0.0
1f4e617681108810e05942998b0b27e9	k__Bacteria; p__Firmicutes; c__Clostridia; o__Clostridiales; f__Christensenellaceae; g__; s__	0.0	0.0	0.0	0.0	0.0	0.0	0.0	48.0	0.0	0.0	69.0	0.0	38.0	41.0	0.0	33.0	0.0	0.0	0.0	0.0	0.0	0.0	0.0	0.0	0.0	0.0	111.0	0.0	0.0	0.0	0.0	0.0	0.0	0.0	0.0	33.0	0.0	0.0	0.0	0.0	0.0	66.0	0.0	0.0	0.0	0.0	0.0	0.0
6492b36fa7a36023928bae4cc58ecca9	k__Bacteria; p__Bacteroidetes; c__Bacteroidia; o__Bacteroidales; f__Bacteroidaceae; g__Bacteroides; s__	0.0	0.0	0.0	0.0	0.0	0.0	30.0	0.0	0.0	0.0	0.0	0.0	36.0	28.0	0.0	0.0	0.0	53.0	30.0	53.0	54.0	0.0	143.0	0.0	0.0	0.0	13.0	0.0	0.0	0.0	0.0	0.0	0.0	0.0	0.0	47.0	0.0	0.0	40.0	0.0	0.0	0.0	0.0	41.0	0.0	0.0	0.0	170.0
11614c877ac79c7f870ed3bd23e9d17f	k__Bacteria; p__Firmicutes; c__Clostridia; o__Clostridiales; f__Ruminococcaceae; g__Anaerotruncus; s__	0.0	0.0	0.0	0.0	32.0	0.0	0.0	0.0	0.0	0.0	0.0	0.0	0.0	0.0	0.0	0.0	0.0	0.0	0.0	0.0	0.0	0.0	0.0	0.0	0.0	0.0	0.0	0.0	0.0	0.0	0.0	0.0	0.0	0.0	0.0	0.0	0.0	0.0	0.0	0.0	0.0	0.0	0.0	0.0	0.0	11.0	0.0	0.0
ed85c1bc4f38c7d8cbae051b0639bc6f	k__Bacteria; p__Bacteroidetes; c__Bacteroidia; o__Bacteroidales; f__Bacteroidaceae; g__Bacteroides; s__	0.0	0.0	0.0	0.0	17.0	0.0	0.0	85.0	0.0	0.0	0.0	0.0	10.0	15.0	0.0	0.0	0.0	0.0	0.0	0.0	0.0	0.0	0.0	91.0	0.0	0.0	0.0	356.0	0.0	0.0	0.0	0.0	0.0	0.0	770.0	0.0	0.0	0.0	31.0	0.0	0.0	0.0	0.0	44.0	0.0	0.0	0.0	0.0
55d86052d7e2f1e196bae3d3e6d6b4be	k__Bacteria; p__Actinobacteria; c__Coriobacteriia; o__Coriobacteriales; f__Coriobacteriaceae; g__Eggerthella; s__lenta	0.0	0.0	9.0	0.0	13.0	0.0	0.0	0.0	0.0	0.0	0.0	0.0	0.0	0.0	0.0	0.0	0.0	0.0	0.0	0.0	0.0	0.0	0.0	0.0	0.0	0.0	0.0	0.0	0.0	0.0	0.0	0.0	0.0	0.0	0.0	0.0	0.0	37.0	0.0	0.0	0.0	0.0	0.0	0.0	0.0	0.0	0.0	0.0
f116ee6aacda4a2e2ac4eb744a15b3aa	k__Bacteria; p__Firmicutes; c__Clostridia; o__Clostridiales; f__Ruminococcaceae; g__Oscillospira; s__	50.0	30.0	0.0	0.0	54.0	0.0	28.0	0.0	0.0	59.0	0.0	4.0	0.0	36.0	36.0	51.0	64.0	0.0	39.0	36.0	0.0	16.0	30.0	23.0	45.0	18.0	0.0	0.0	0.0	52.0	35.0	47.0	0.0	64.0	64.0	32.0	45.0	39.0	24.0	44.0	0.0	45.0	0.0	65.0	0.0	28.0	50.0	31.0
54e960b57b5f2ffd7879683708472361	k__Bacteria; p__Firmicutes; c__Clostridia; o__Clostridiales; f__Lachnospiraceae	0.0	0.0	0.0	0.0	0.0	48.0	0.0	0.0	0.0	0.0	0.0	0.0	0.0	0.0	0.0	0.0	0.0	33.0	0.0	26.0	41.0	15.0	55.0	56.0	0.0	0.0	48.0	0.0	0.0	0.0	0.0	0.0	0.0	0.0	17.0	54.0	0.0	0.0	0.0	19.0	0.0	0.0	0.0	0.0	31.0	0.0	0.0	53.0
6650e5a382bea5667d3845a22ae83e3b	k__Bacteria; p__Bacteroidetes; c__Bacteroidia; o__Bacteroidales; f__Bacteroidaceae; g__Bacteroides; s__fragilis	0.0	0.0	55.0	0.0	0.0	0.0	17.0	0.0	0.0	0.0	0.0	58.0	0.0	0.0	0.0	39.0	0.0	0.0	0.0	0.0	0.0	0.0	107.0	0.0	0.0	0.0	0.0	15.0	0.0	20.0	23.0	0.0	0.0	0.0	0.0	0.0	639.0	59.0	0.0	84.0	0.0	0.0	0.0	0.0	0.0	0.0	0.0	32.0
7e8b191f34c8b7f827f1e18a2159f0c1	k__Bacteria; p__Bacteroidetes; c__Bacteroidia; o__Bacteroidales; f__Prevotellaceae; g__Prevotella; s__	0.0	0.0	0.0	0.0	0.0	0.0	0.0	26.0	0.0	0.0	0.0	0.0	45.0	16.0	0.0	0.0	0.0	0.0	0.0	0.0	0.0	0.0	0.0	0.0	0.0	0.0	0.0	0.0	0.0	0.0	0.0	0.0	0.0	0.0	317.0	0.0	0.0	0.0	120.0	0.0	0.0	0.0	0.0	23.0	0.0	0.0	0.0	99.0
0b384b99998de7760c35a87ba3bed9f2	k__Bacteria; p__Firmicutes; c__Clostridia; o__Clostridiales; f__Veillonellaceae; g__Veillonella	0.0	0.0	0.0	0.0	0.0	0.0	14.0	0.0	5.0	0.0	0.0	0.0	0.0	0.0	0.0	0.0	0.0	0.0	0.0	0.0	0.0	0.0	0.0	0.0	0.0	0.0	0.0	0.0	0.0	0.0	0.0	0.0	0.0	0.0	0.0	24.0	0.0	0.0	0.0	0.0	3.0	0.0	0.0	0.0	0.0	0.0	42.0	2.0
cdf7bb2c9e304129dc1553fbb6705601	k__Bacteria; p__Bacteroidetes; c__Bacteroidia; o__Bacteroidales; f__Bacteroidaceae; g__Bacteroides; s__uniformis	13.0	0.0	0.0	0.0	0.0	0.0	0.0	0.0	0.0	0.0	0.0	0.0	0.0	0.0	0.0	0.0	0.0	32.0	0.0	0.0	0.0	0.0	0.0	0.0	0.0	8.0	1.0	0.0	0.0	0.0	552.0	0.0	0.0	0.0	0.0	0.0	0.0	0.0	0.0	0.0	0.0	18.0	0.0	4.0	0.0	0.0	0.0	1.0
533a03d7489b2dc7ef69056ea0bd1429	k__Bacteria; p__Firmicutes; c__Clostridia; o__Clostridiales; f__Ruminococcaceae; g__Oscillospira; s__	0.0	0.0	0.0	0.0	27.0	0.0	0.0	0.0	0.0	0.0	0.0	0.0	0.0	0.0	0.0	0.0	0.0	0.0	0.0	0.0	0.0	0.0	0.0	0.0	0.0	0.0	0.0	0.0	0.0	30.0	0.0	0.0	0.0	0.0	57.0	0.0	21.0	40.0	0.0	0.0	0.0	23.0	0.0	0.0	0.0	0.0	0.0	0.0
4b0c2052c7e817d5a3030d4843127461	k__Bacteria; p__Firmicutes; c__Clostridia; o__Clostridiales; f__Lachnospiraceae; g__; s__	0.0	0.0	0.0	0.0	0.0	0.0	0.0	0.0	39.0	0.0	0.0	28.0	35.0	0.0	0.0	0.0	0.0	0.0	0.0	26.0	0.0	80.0	24.0	38.0	37.0	0.0	0.0	0.0	39.0	50.0	12.0	0.0	0.0	66.0	267.0	32.0	26.0	0.0	42.0	108.0	0.0	0.0	0.0	27.0	43.0	0.0	124.0	18.0
0f82722b1cb23a93fac0e54b0a840e37	k__Bacteria; p__Firmicutes; c__Clostridia; o__Clostridiales; f__Ruminococcaceae; g__Faecalibacterium; s__prausnitzii	52.0	61.0	0.0	0.0	60.0	61.0	36.0	107.0	150.0	89.0	0.0	28.0	19.0	53.0	45.0	30.0	40.0	80.0	0.0	62.0	0.0	36.0	128.0	18.0	0.0	60.0	39.0	138.0	79.0	47.0	107.0	17.0	66.0	20.0	299.0	105.0	106.0	50.0	47.0	102.0	0.0	29.0	14.0	166.0	76.0	0.0	35.0	125.0
e0dffc32b3ce1429ee9fea762846aee0	k__Bacteria; p__Firmicutes; c__Clostridia; o__Clostridiales; f__Lachnospiraceae; g__; s__	0.0	0.0	0.0	0.0	0.0	0.0	0.0	0.0	0.0	0.0	0.0	0.0	0.0	0.0	0.0	0.0	60.0	0.0	0.0	0.0	0.0	0.0	35.0	19.0	0.0	0.0	0.0	0.0	0.0	0.0	0.0	0.0	0.0	0.0	0.0	27.0	0.0	0.0	0.0	0.0	0.0	0.0	0.0	0.0	0.0	0.0	0.0	0.0
52ebc18320689419bb0d04df2ba3b789	k__Bacteria; p__Firmicutes; c__Clostridia; o__Clostridiales; f__Lachnospiraceae; g__; s__	0.0	54.0	0.0	0.0	0.0	0.0	0.0	0.0	0.0	0.0	0.0	0.0	0.0	0.0	21.0	0.0	0.0	0.0	0.0	55.0	0.0	0.0	28.0	0.0	0.0	24.0	11.0	0.0	0.0	0.0	24.0	0.0	0.0	0.0	59.0	43.0	0.0	0.0	0.0	0.0	0.0	0.0	0.0	28.0	0.0	0.0	0.0	0.0
25ce3089239bb8dbdb5533e8ba8d0225	k__Bacteria; p__Firmicutes; c__Clostridia; o__Clostridiales; f__Lachnospiraceae; g__Blautia; s__obeum	0.0	0.0	0.0	0.0	0.0	25.0	43.0	0.0	58.0	47.0	27.0	47.0	0.0	60.0	0.0	46.0	81.0	0.0	0.0	0.0	0.0	68.0	0.0	0.0	71.0	0.0	0.0	47.0	0.0	0.0	80.0	36.0	65.0	15.0	108.0	55.0	28.0	65.0	32.0	0.0	0.0	28.0	58.0	0.0	0.0	39.0	0.0	106.0
8ba593c3c5465097199eaf81f7b8c680	k__Bacteria; p__Firmicutes; c__Clostridia; o__Clostridiales; f__Ruminococcaceae	0.0	0.0	0.0	0.0	119.0	0.0	0.0	0.0	0.0	31.0	0.0	0.0	0.0	0.0	0.0	47.0	0.0	0.0	0.0	0.0	0.0	0.0	0.0	0.0	0.0	0.0	0.0	0.0	0.0	0.0	0.0	0.0	0.0	0.0	0.0	0.0	0.0	0.0	0.0	0.0	0.0	0.0	0.0	0.0	0.0	0.0	21.0	0.0
f1538aa05667e504aacaa853de5163bd	k__Bacteria; p__Bacteroidetes; c__Bacteroidia; o__Bacteroidales; f__[Odoribacteraceae]; g__Odoribacter; s__	0.0	21.0	0.0	0.0	45.0	42.0	0.0	8.0	13.0	0.0	9.0	38.0	0.0	16.0	0.0	41.0	0.0	36.0	26.0	27.0	0.0	28.0	0.0	0.0	36.0	60.0	40.0	0.0	5.0	0.0	0.0	22.0	0.0	19.0	210.0	15.0	63.0	48.0	0.0	0.0	0.0	24.0	18.0	0.0	21.0	26.0	14.0	0.0
d2427fd958502a9d856aa05658564532	k__Bacteria; p__Firmicutes; c__Clostridia; o__Clostridiales; f__Lachnospiraceae; g__Anaerostipes; s__	0.0	0.0	0.0	0.0	0.0	0.0	0.0	0.0	0.0	0.0	0.0	0.0	0.0	0.0	0.0	0.0	0.0	0.0	0.0	0.0	0.0	0.0	0.0	0.0	0.0	0.0	0.0	0.0	0.0	0.0	0.0	0.0	0.0	0.0	0.0	0.0	0.0	0.0	0.0	0.0	0.0	0.0	0.0	0.0	0.0	0.0	0.0	21.0
1a1341de8e0febbd9e0fad6b586323d1	k__Bacteria; p__Bacteroidetes; c__Bacteroidia; o__Bacteroidales; f__Porphyromonadaceae; g__Parabacteroides; s__	0.0	0.0	0.0	0.0	0.0	0.0	0.0	0.0	0.0	0.0	0.0	62.0	0.0	0.0	0.0	33.0	0.0	0.0	0.0	0.0	0.0	0.0	0.0	20.0	0.0	0.0	0.0	0.0	0.0	0.0	0.0	38.0	0.0	71.0	37.0	0.0	19.0	149.0	0.0	0.0	0.0	0.0	0.0	0.0	0.0	0.0	0.0	0.0
1ecab5cc8b0e5f61bd32d17afa91c7c0	k__Bacteria; p__Firmicutes; c__Clostridia; o__Clostridiales; f__Lachnospiraceae; g__Roseburia; s__	0.0	0.0	0.0	0.0	0.0	0.0	0.0	0.0	0.0	65.0	0.0	19.0	0.0	0.0	17.0	45.0	0.0	0.0	0.0	0.0	0.0	0.0	29.0	25.0	0.0	55.0	51.0	0.0	31.0	0.0	34.0	0.0	0.0	0.0	52.0	26.0	0.0	0.0	0.0	0.0	0.0	0.0	0.0	0.0	0.0	45.0	0.0	150.0
95ddafe4c0c3f410c079d46592ddd647	k__Bacteria; p__Firmicutes; c__Clostridia; o__Clostridiales; f__Ruminococcaceae; g__Butyricicoccus; s__pullicaecorum	0.0	0.0	0.0	0.0	0.0	59.0	0.0	34.0	0.0	37.0	0.0	72.0	27.0	0.0	41.0	0.0	0.0	0.0	37.0	0.0	0.0	0.0	0.0	30.0	44.0	0.0	0.0	0.0	52.0	0.0	66.0	0.0	0.0	0.0	47.0	0.0	0.0	0.0	52.0	93.0	60.0	30.0	57.0	92.0	63.0	74.0	77.0	112.0
335eb5a1dd9b6e5e9b53145deb44a799	k__Bacteria; p__Firmicutes; c__Bacilli; o__Lactobacillales; f__Enterococcaceae; g__Enterococcus; s__	0.0	0.0	0.0	0.0	58.0	21.0	0.0	0.0	0.0	50.0	0.0	0.0	0.0	16.0	0.0	0.0	0.0	0.0	0.0	0.0	0.0	0.0	0.0	0.0	0.0	0.0	0.0	29.0	0.0	0.0	0.0	0.0	0.0	0.0	0.0	0.0	0.0	40.0	0.0	0.0	0.0	0.0	0.0	0.0	0.0	0.0	0.0	0.0
2c32a8999ea4d78435ceaaa49f9b56e1	k__Bacteria; p__Firmicutes; c__Erysipelotrichi; o__Erysipelotrichales; f__Erysipelotrichaceae; g__Holdemania; s__	0.0	0.0	0.0	0.0	0.0	0.0	0.0	0.0	0.0	23.0	0.0	0.0	0.0	0.0	0.0	0.0	0.0	0.0	0.0	0.0	0.0	0.0	22.0	0.0	0.0	53.0	0.0	0.0	0.0	0.0	0.0	0.0	0.0	0.0	40.0	0.0	57.0	0.0	0.0	119.0	0.0	0.0	0.0	0.0	0.0	34.0	0.0	57.0
b021571b110f26d1c9b226e34d31d515	k__Bacteria; p__Firmicutes; c__Clostridia; o__Clostridiales; f__Ruminococcaceae	0.0	37.0	0.0	0.0	0.0	73.0	0.0	0.0	0.0	0.0	31.0	0.0	58.0	0.0	0.0	0.0	0.0	0.0	57.0	0.0	0.0	0.0	0.0	0.0	0.0	0.0	67.0	0.0	104.0	0.0	0.0	0.0	0.0	0.0	0.0	218.0	0.0	0.0	0.0	0.0	0.0	44.0	0.0	0.0	44.0	0.0	24.0	0.0
4e1bd41467e0e1f971abd0eca03bdd2b	k__Bacteria; p__Firmicutes; c__Clostridia; o__Clostridiales; f__Lachnospiraceae; g__Clostridium; s__hathewayi	0.0	0.0	0.0	0.0	429.0	0.0	0.0	0.0	0.0	0.0	0.0	0.0	0.0	0.0	0.0	53.0	0.0	0.0	0.0	0.0	0.0	0.0	0.0	0.0	28.0	0.0	0.0	0.0	0.0	0.0	0.0	0.0	42.0	0.0	0.0	0.0	0.0	0.0	0.0	0.0	0.0	32.0	0.0	0.0	0.0	0.0	0.0	20.0
3c9f25b23d7f8cc656409a2190f7a51b	k__Bacteria; p__Actinobacteria; c__Actinobacteria; o__Bifidobacteriales; f__Bifidobacteriaceae; g__Bifidobacterium; s__bifidum	0.0	0.0	33.0	0.0	0.0	0.0	11.0	0.0	0.0	0.0	0.0	0.0	0.0	0.0	0.0	0.0	0.0	0.0	0.0	0.0	0.0	0.0	0.0	0.0	0.0	0.0	0.0	0.0	0.0	0.0	0.0	0.0	0.0	0.0	0.0	0.0	0.0	0.0	0.0	0.0	25.0	0.0	0.0	0.0	0.0	86.0	0.0	0.0
8eb677975ce95da72cbd0bd3c691ff54	k__Bacteria; p__Firmicutes; c__Clostridia; o__Clostridiales; f__Ruminococcaceae; g__Oscillospira; s__	0.0	0.0	0.0	0.0	0.0	0.0	0.0	13.0	0.0	0.0	0.0	0.0	0.0	0.0	0.0	0.0	0.0	0.0	0.0	0.0	0.0	0.0	0.0	0.0	0.0	0.0	0.0	0.0	12.0	0.0	50.0	0.0	0.0	0.0	60.0	29.0	0.0	0.0	0.0	0.0	0.0	34.0	0.0	0.0	0.0	0.0	0.0	0.0
77e6b11badb7973884ba4f9afcd9224f	k__Bacteria; p__Bacteroidetes; c__Bacteroidia; o__Bacteroidales; f__Bacteroidaceae; g__Bacteroides; s__plebeius	0.0	0.0	0.0	0.0	0.0	270.0	0.0	113.0	0.0	0.0	0.0	0.0	740.0	133.0	384.0	26.0	130.0	106.0	0.0	0.0	0.0	0.0	0.0	0.0	0.0	0.0	0.0	0.0	14.0	0.0	0.0	0.0	0.0	0.0	0.0	0.0	0.0	0.0	143.0	0.0	0.0	0.0	0.0	0.0	426.0	0.0	49.0	0.0
8e9f630565fd120a5b3a45bb5a2b60c7	k__Bacteria; p__Firmicutes; c__Clostridia; o__Clostridiales; f__Ruminococcaceae	0.0	0.0	0.0	0.0	0.0	0.0	0.0	31.0	0.0	0.0	0.0	0.0	0.0	0.0	0.0	25.0	0.0	22.0	0.0	0.0	0.0	0.0	0.0	0.0	0.0	0.0	0.0	0.0	38.0	0.0	0.0	0.0	0.0	0.0	0.0	0.0	0.0	0.0	0.0	0.0	0.0	0.0	0.0	0.0	0.0	0.0	0.0	0.0
c66a08c3578e950fcbb8d14e290fe62e	k__Bacteria; p__Firmicutes; c__Clostridia; o__Clostridiales; f__Lachnospiraceae; g__Blautia; s__	0.0	54.0	0.0	50.0	0.0	32.0	58.0	46.0	0.0	35.0	0.0	23.0	50.0	30.0	33.0	43.0	32.0	0.0	54.0	0.0	58.0	49.0	0.0	50.0	52.0	167.0	33.0	45.0	33.0	30.0	32.0	0.0	48.0	0.0	153.0	11.0	33.0	48.0	18.0	0.0	74.0	30.0	41.0	24.0	62.0	53.0	0.0	48.0
9d1a219bfd4117bfe488eda2f87a4b01	k__Bacteria; p__Firmicutes; c__Clostridia; o__Clostridiales; f__Lachnospiraceae; g__Lachnobacterium; s__	0.0	0.0	0.0	0.0	0.0	0.0	0.0	0.0	0.0	0.0	0.0	0.0	0.0	0.0	0.0	0.0	0.0	0.0	0.0	0.0	0.0	0.0	0.0	0.0	0.0	29.0	0.0	0.0	0.0	15.0	0.0	0.0	0.0	0.0	0.0	0.0	0.0	0.0	0.0	27.0	0.0	0.0	0.0	0.0	0.0	0.0	0.0	90.0
820a87d89c44dbf7f7da843c477575e3	k__Bacteria; p__Proteobacteria; c__Alphaproteobacteria; o__RF32; f__; g__; s__	0.0	100.0	0.0	0.0	0.0	0.0	0.0	0.0	0.0	0.0	0.0	20.0	0.0	0.0	0.0	30.0	0.0	0.0	0.0	0.0	0.0	411.0	0.0	15.0	21.0	0.0	0.0	0.0	0.0	0.0	0.0	0.0	0.0	0.0	40.0	121.0	0.0	0.0	45.0	0.0	0.0	0.0	0.0	0.0	0.0	0.0	0.0	0.0
3b88ad99c1404c2ed5654b83fbeb1242	k__Bacteria; p__Firmicutes; c__Erysipelotrichi; o__Erysipelotrichales; f__Erysipelotrichaceae; g__Clostridium; s__ramosum	0.0	0.0	40.0	0.0	34.0	0.0	0.0	0.0	0.0	0.0	0.0	0.0	0.0	0.0	0.0	0.0	0.0	0.0	0.0	0.0	0.0	0.0	0.0	0.0	0.0	0.0	0.0	0.0	0.0	0.0	0.0	0.0	0.0	0.0	0.0	0.0	0.0	43.0	0.0	0.0	31.0	0.0	0.0	0.0	0.0	0.0	0.0	0.0
95fc5a6eb6fbb26ee0f727da89d582ed	k__Bacteria; p__Firmicutes; c__Clostridia; o__Clostridiales; f__Lachnospiraceae; g__Clostridium; s__hathewayi	0.0	0.0	0.0	0.0	37.0	0.0	0.0	0.0	0.0	0.0	0.0	0.0	0.0	0.0	0.0	0.0	0.0	0.0	0.0	0.0	0.0	0.0	0.0	0.0	0.0	0.0	0.0	0.0	0.0	0.0	0.0	0.0	0.0	0.0	0.0	0.0	0.0	0.0	0.0	0.0	0.0	50.0	30.0	0.0	0.0	0.0	0.0	30.0
92fe3bcb5239bca0dd394b1de8a1c0ec	k__Bacteria; p__Bacteroidetes; c__Bacteroidia; o__Bacteroidales; f__[Odoribacteraceae]; g__Odoribacter; s__	0.0	9.0	0.0	0.0	56.0	17.0	29.0	23.0	13.0	34.0	16.0	20.0	49.0	20.0	42.0	15.0	22.0	0.0	27.0	15.0	0.0	19.0	0.0	62.0	0.0	0.0	10.0	0.0	27.0	0.0	0.0	36.0	75.0	32.0	86.0	25.0	27.0	0.0	47.0	21.0	0.0	15.0	15.0	24.0	3.0	0.0	19.0	0.0
4700afb6cbcc7d3d4f588d369735d39c	k__Bacteria; p__Firmicutes; c__Clostridia; o__Clostridiales; f__Clostridiaceae; g__SMB53; s__	0.0	0.0	49.0	57.0	0.0	29.0	0.0	38.0	0.0	0.0	0.0	0.0	0.0	0.0	47.0	0.0	0.0	39.0	0.0	0.0	0.0	0.0	0.0	0.0	0.0	78.0	0.0	45.0	21.0	0.0	0.0	0.0	0.0	0.0	340.0	0.0	34.0	0.0	0.0	0.0	31.0	0.0	0.0	0.0	0.0	0.0	19.0	77.0
4ede34ec50b830030dd4ed1f8b0c401a	k__Bacteria; p__Firmicutes; c__Clostridia; o__Clostridiales; f__Lachnospiraceae; g__Coprococcus; s__	0.0	0.0	50.0	0.0	23.0	34.0	12.0	0.0	0.0	0.0	0.0	39.0	10.0	0.0	15.0	28.0	8.0	0.0	0.0	0.0	0.0	0.0	34.0	22.0	7.0	23.0	0.0	25.0	40.0	0.0	11.0	0.0	0.0	0.0	23.0	17.0	49.0	22.0	26.0	0.0	0.0	21.0	2.0	0.0	0.0	0.0	0.0	21.0
046bdf91b07d4c0612430c43357c2067	k__Bacteria; p__Firmicutes; c__Clostridia; o__Clostridiales; f__Lachnospiraceae; g__Coprococcus; s__	0.0	0.0	0.0	0.0	0.0	0.0	0.0	0.0	0.0	0.0	0.0	0.0	0.0	0.0	0.0	0.0	0.0	0.0	0.0	0.0	0.0	0.0	0.0	0.0	0.0	0.0	0.0	0.0	0.0	0.0	5.0	0.0	0.0	0.0	0.0	0.0	0.0	10.0	0.0	0.0	0.0	0.0	0.0	0.0	19.0	0.0	0.0	0.0
4398218500a554138b6f469e384dc613	k__Bacteria; p__Bacteroidetes; c__Bacteroidia; o__Bacteroidales; f__Rikenellaceae; g__; s__	24.0	17.0	0.0	0.0	25.0	0.0	0.0	37.0	0.0	35.0	19.0	39.0	32.0	59.0	0.0	25.0	33.0	0.0	95.0	56.0	0.0	0.0	0.0	37.0	32.0	0.0	23.0	0.0	39.0	0.0	0.0	14.0	41.0	80.0	115.0	48.0	40.0	0.0	86.0	0.0	0.0	0.0	20.0	65.0	0.0	37.0	49.0	0.0
cd4e89e10bd8eb6123442bc289381940	k__Bacteria; p__Bacteroidetes; c__Bacteroidia; o__Bacteroidales; f__[Barnesiellaceae]; g__; s__	34.0	0.0	0.0	0.0	0.0	18.0	0.0	0.0	0.0	0.0	0.0	0.0	0.0	2.0	0.0	0.0	0.0	0.0	0.0	0.0	0.0	0.0	0.0	0.0	0.0	0.0	271.0	0.0	0.0	0.0	0.0	0.0	167.0	0.0	562.0	0.0	0.0	0.0	0.0	0.0	0.0	0.0	79.0	0.0	0.0	0.0	0.0	0.0
c17a6609eecbfda1ac64fb275d70163c	k__Bacteria; p__Firmicutes; c__Clostridia; o__Clostridiales; f__Ruminococcaceae; g__Oscillospira; s__	0.0	0.0	0.0	0.0	0.0	18.0	0.0	0.0	0.0	124.0	0.0	34.0	0.0	29.0	0.0	0.0	0.0	0.0	0.0	0.0	0.0	0.0	0.0	0.0	0.0	0.0	15.0	0.0	0.0	0.0	20.0	0.0	0.0	0.0	0.0	0.0	0.0	0.0	0.0	0.0	0.0	0.0	0.0	0.0	0.0	0.0	0.0	33.0
c521ae0071a181dba7224c7022be82ff	k__Bacteria; p__Firmicutes; c__Clostridia; o__Clostridiales; f__Ruminococcaceae; g__Oscillospira; s__	63.0	18.0	0.0	0.0	0.0	27.0	30.0	32.0	0.0	56.0	27.0	0.0	0.0	59.0	0.0	0.0	0.0	41.0	0.0	0.0	0.0	0.0	0.0	0.0	0.0	0.0	27.0	39.0	0.0	0.0	0.0	27.0	59.0	52.0	27.0	13.0	23.0	0.0	0.0	0.0	0.0	0.0	35.0	0.0	34.0	0.0	0.0	33.0
3f718c5f0ac6ac15ba10a592993333a5	k__Bacteria; p__Proteobacteria; c__Betaproteobacteria; o__Burkholderiales; f__Alcaligenaceae; g__Sutterella; s__	0.0	0.0	0.0	0.0	0.0	0.0	0.0	0.0	0.0	0.0	0.0	0.0	0.0	0.0	0.0	0.0	0.0	56.0	0.0	0.0	0.0	0.0	0.0	0.0	0.0	59.0	0.0	40.0	0.0	0.0	59.0	0.0	0.0	0.0	0.0	0.0	0.0	0.0	0.0	0.0	0.0	0.0	0.0	0.0	47.0	0.0	0.0	0.0
8df63e0c4141c01c793579d696485222	k__Bacteria; p__Firmicutes; c__Clostridia; o__Clostridiales; f__Lachnospiraceae; g__Dorea; s__	0.0	0.0	0.0	0.0	0.0	0.0	0.0	0.0	0.0	14.0	0.0	14.0	0.0	0.0	0.0	0.0	0.0	55.0	30.0	0.0	0.0	0.0	24.0	0.0	0.0	20.0	0.0	84.0	0.0	0.0	70.0	0.0	0.0	0.0	22.0	0.0	0.0	65.0	0.0	0.0	0.0	17.0	15.0	0.0	0.0	47.0	26.0	39.0
0f8119b2dc86f110e35d8399c4e45ffd	k__Bacteria; p__Firmicutes; c__Clostridia; o__Clostridiales; f__Ruminococcaceae	0.0	20.0	0.0	0.0	0.0	27.0	0.0	0.0	0.0	0.0	91.0	26.0	38.0	0.0	0.0	0.0	43.0	66.0	0.0	51.0	0.0	0.0	0.0	0.0	0.0	0.0	0.0	0.0	31.0	0.0	0.0	35.0	92.0	50.0	22.0	12.0	31.0	63.0	0.0	0.0	0.0	67.0	0.0	0.0	0.0	0.0	34.0	0.0
e37113e9eeb235d091323e78b1c4ce01	k__Bacteria; p__Firmicutes; c__Erysipelotrichi; o__Erysipelotrichales; f__Erysipelotrichaceae; g__[Eubacterium]; s__biforme	28.0	0.0	0.0	0.0	0.0	0.0	0.0	0.0	0.0	122.0	35.0	0.0	0.0	143.0	0.0	0.0	0.0	0.0	0.0	0.0	0.0	0.0	0.0	0.0	0.0	0.0	0.0	43.0	0.0	0.0	0.0	0.0	0.0	0.0	0.0	0.0	0.0	0.0	0.0	0.0	0.0	26.0	0.0	0.0	0.0	0.0	0.0	0.0
404dd5d57cecc06fc8b0d9f1e41c42ec	k__Bacteria; p__Firmicutes; c__Clostridia; o__Clostridiales; f__Lachnospiraceae	0.0	0.0	0.0	0.0	0.0	0.0	0.0	0.0	0.0	0.0	0.0	0.0	0.0	0.0	0.0	0.0	0.0	0.0	0.0	0.0	0.0	0.0	62.0	0.0	0.0	0.0	0.0	0.0	0.0	0.0	0.0	0.0	0.0	0.0	0.0	0.0	0.0	0.0	0.0	0.0	8.0	0.0	0.0	0.0	0.0	0.0	0.0	0.0
ce226f1d6c2f709c6b5c48cff3742e63	k__Bacteria; p__Firmicutes; c__Clostridia; o__Clostridiales; f__Veillonellaceae; g__Veillonella; s__dispar	0.0	0.0	0.0	30.0	0.0	0.0	0.0	0.0	0.0	0.0	0.0	0.0	0.0	0.0	64.0	0.0	0.0	0.0	0.0	0.0	0.0	0.0	0.0	0.0	0.0	0.0	0.0	0.0	0.0	0.0	0.0	31.0	0.0	0.0	0.0	0.0	80.0	0.0	0.0	0.0	0.0	0.0	17.0	0.0	89.0	0.0	0.0	20.0
65c0f4879b7f1619c60b4dd401219788	k__Bacteria; p__Firmicutes; c__Clostridia; o__Clostridiales; f__Lachnospiraceae	0.0	31.0	0.0	39.0	0.0	27.0	35.0	17.0	0.0	29.0	0.0	35.0	23.0	0.0	21.0	44.0	22.0	0.0	37.0	0.0	12.0	38.0	19.0	33.0	25.0	29.0	46.0	42.0	52.0	0.0	0.0	0.0	0.0	0.0	87.0	33.0	23.0	34.0	0.0	0.0	17.0	39.0	27.0	0.0	0.0	0.0	0.0	20.0
aa492eda295569cb81e923c3e8271080	k__Bacteria; p__Firmicutes; c__Clostridia; o__SHA-98; f__; g__; s__	0.0	0.0	0.0	0.0	0.0	0.0	0.0	0.0	0.0	0.0	0.0	7.0	0.0	0.0	0.0	0.0	0.0	0.0	0.0	0.0	0.0	0.0	0.0	0.0	0.0	0.0	10.0	0.0	0.0	0.0	0.0	0.0	0.0	45.0	32.0	0.0	0.0	0.0	0.0	0.0	0.0	0.0	0.0	0.0	0.0	0.0	0.0	37.0
e2cea962187d114364a640787c313a14	k__Bacteria; p__Firmicutes; c__Bacilli; o__Turicibacterales; f__Turicibacteraceae; g__Turicibacter; s__	0.0	0.0	12.0	0.0	40.0	0.0	0.0	23.0	0.0	0.0	0.0	0.0	0.0	0.0	0.0	0.0	0.0	0.0	0.0	0.0	6.0	0.0	0.0	0.0	0.0	0.0	0.0	21.0	0.0	0.0	0.0	0.0	0.0	0.0	218.0	9.0	12.0	0.0	0.0	0.0	26.0	5.0	0.0	0.0	0.0	0.0	0.0	3.0
5360754ee0b4c9f609748bc4de79fbb3	k__Bacteria; p__Firmicutes; c__Clostridia; o__Clostridiales; f__Lachnospiraceae	0.0	0.0	0.0	0.0	0.0	25.0	0.0	0.0	38.0	0.0	0.0	0.0	0.0	0.0	0.0	0.0	53.0	0.0	0.0	0.0	0.0	0.0	0.0	0.0	0.0	23.0	0.0	0.0	0.0	0.0	0.0	0.0	20.0	0.0	0.0	0.0	0.0	0.0	64.0	0.0	0.0	0.0	49.0	0.0	0.0	0.0	0.0	0.0
3cc36474b51e0834d3d1915dbf4d6d03	k__Bacteria; p__Proteobacteria; c__Gammaproteobacteria; o__Pasteurellales; f__Pasteurellaceae; g__Haemophilus; s__parainfluenzae	0.0	0.0	0.0	0.0	0.0	0.0	0.0	0.0	21.0	0.0	0.0	0.0	0.0	0.0	0.0	0.0	0.0	44.0	0.0	0.0	0.0	0.0	0.0	0.0	0.0	0.0	0.0	41.0	0.0	0.0	0.0	0.0	0.0	0.0	0.0	0.0	20.0	0.0	0.0	0.0	0.0	0.0	0.0	0.0	228.0	0.0	40.0	296.0
f066cb98528b6ece5a053e3db78a05cc	k__Bacteria; p__Firmicutes; c__Clostridia; o__Clostridiales; f__Ruminococcaceae; g__Faecalibacterium; s__prausnitzii	43.0	37.0	0.0	0.0	0.0	0.0	0.0	0.0	0.0	0.0	0.0	0.0	0.0	68.0	0.0	0.0	0.0	324.0	0.0	0.0	0.0	0.0	0.0	0.0	0.0	0.0	109.0	0.0	0.0	115.0	0.0	0.0	0.0	0.0	0.0	173.0	0.0	0.0	134.0	0.0	0.0	0.0	0.0	0.0	0.0	0.0	0.0	0.0
befc0f3817d1cb12749b78a1bab0796c	k__Bacteria; p__Bacteroidetes; c__Bacteroidia; o__Bacteroidales; f__Bacteroidaceae; g__Bacteroides; s__coprophilus	0.0	0.0	0.0	0.0	0.0	0.0	0.0	0.0	0.0	0.0	0.0	0.0	0.0	0.0	0.0	0.0	0.0	219.0	0.0	0.0	0.0	0.0	0.0	0.0	0.0	0.0	0.0	0.0	73.0	0.0	0.0	0.0	0.0	115.0	0.0	256.0	0.0	0.0	0.0	0.0	0.0	0.0	0.0	0.0	0.0	0.0	0.0	0.0
d2df0fb57b102fdba165d83581830430	k__Bacteria; p__Firmicutes; c__Clostridia; o__SHA-98; f__; g__; s__	0.0	74.0	0.0	0.0	0.0	0.0	0.0	0.0	0.0	0.0	0.0	40.0	17.0	0.0	0.0	0.0	47.0	0.0	0.0	0.0	0.0	0.0	0.0	0.0	0.0	0.0	33.0	0.0	0.0	0.0	0.0	0.0	69.0	0.0	35.0	20.0	0.0	40.0	0.0	0.0	0.0	0.0	0.0	0.0	0.0	0.0	0.0	19.0
1ca3ce0043960eed1b00eadc5ebbd9a1	k__Bacteria; p__Firmicutes; c__Clostridia; o__Clostridiales; f__Ruminococcaceae; g__Faecalibacterium; s__prausnitzii	15.0	56.0	0.0	36.0	0.0	51.0	201.0	143.0	280.0	142.0	17.0	76.0	66.0	55.0	32.0	54.0	48.0	110.0	30.0	62.0	39.0	30.0	28.0	14.0	91.0	60.0	28.0	144.0	53.0	37.0	311.0	28.0	47.0	43.0	383.0	95.0	50.0	47.0	40.0	51.0	40.0	39.0	20.0	35.0	14.0	135.0	45.0	76.0
7c28c1190ed2a3655f8a4b726c57fc92	k__Bacteria; p__Firmicutes; c__Clostridia; o__Clostridiales; f__Lachnospiraceae	0.0	0.0	0.0	0.0	0.0	0.0	0.0	25.0	0.0	0.0	0.0	41.0	0.0	0.0	0.0	16.0	0.0	0.0	0.0	0.0	0.0	0.0	0.0	0.0	0.0	0.0	0.0	0.0	16.0	0.0	28.0	0.0	0.0	0.0	64.0	27.0	0.0	0.0	0.0	0.0	0.0	0.0	0.0	0.0	0.0	0.0	0.0	0.0
53ab8d590b8129a9611248e2d855feff	k__Bacteria; p__Firmicutes; c__Clostridia; o__Clostridiales; f__Ruminococcaceae; g__Oscillospira; s__	0.0	20.0	0.0	0.0	0.0	0.0	0.0	0.0	0.0	24.0	0.0	0.0	0.0	0.0	0.0	0.0	0.0	0.0	18.0	0.0	0.0	0.0	16.0	15.0	0.0	0.0	0.0	0.0	0.0	0.0	0.0	0.0	0.0	0.0	0.0	43.0	60.0	0.0	0.0	43.0	17.0	0.0	0.0	0.0	0.0	8.0	23.0	38.0
028613bcd6d9ec2b2d5c2571cc6d98d6	k__Bacteria; p__Firmicutes; c__Clostridia; o__Clostridiales; f__Lachnospiraceae; g__Coprococcus; s__	0.0	112.0	109.0	0.0	0.0	32.0	0.0	0.0	0.0	0.0	0.0	0.0	0.0	0.0	0.0	16.0	0.0	0.0	38.0	0.0	15.0	0.0	0.0	0.0	0.0	41.0	0.0	0.0	0.0	0.0	17.0	0.0	33.0	0.0	35.0	0.0	45.0	31.0	0.0	0.0	0.0	0.0	35.0	0.0	0.0	0.0	0.0	0.0
a9fe1d2d25e1ba401b16682dbdabe008	k__Bacteria; p__Bacteroidetes; c__Bacteroidia; o__Bacteroidales; f__Bacteroidaceae; g__Bacteroides	0.0	32.0	0.0	0.0	0.0	0.0	0.0	0.0	0.0	0.0	0.0	0.0	0.0	0.0	0.0	0.0	20.0	0.0	0.0	0.0	0.0	0.0	0.0	0.0	0.0	0.0	0.0	0.0	0.0	0.0	0.0	0.0	0.0	0.0	0.0	57.0	349.0	0.0	0.0	98.0	0.0	0.0	0.0	42.0	0.0	0.0	0.0	0.0
5111e6b747d15ad8dba0615904a07706	k__Bacteria; p__Firmicutes; c__Clostridia; o__Clostridiales; f__Ruminococcaceae; g__Gemmiger; s__formicilis	0.0	0.0	0.0	0.0	0.0	0.0	0.0	0.0	55.0	0.0	12.0	0.0	0.0	0.0	0.0	0.0	0.0	0.0	0.0	0.0	0.0	0.0	0.0	0.0	0.0	246.0	0.0	0.0	0.0	0.0	11.0	0.0	0.0	0.0	0.0	0.0	0.0	0.0	0.0	0.0	118.0	0.0	96.0	22.0	0.0	0.0	0.0	0.0
340e4833f87d2a1150b4061f3cf978de	k__Bacteria; p__Proteobacteria; c__Deltaproteobacteria; o__Desulfovibrionales; f__Desulfovibrionaceae; g__; s__	0.0	0.0	0.0	0.0	0.0	0.0	0.0	0.0	0.0	0.0	0.0	0.0	0.0	49.0	0.0	0.0	0.0	0.0	0.0	0.0	41.0	0.0	0.0	0.0	0.0	0.0	0.0	0.0	0.0	0.0	0.0	0.0	0.0	50.0	23.0	0.0	0.0	29.0	0.0	0.0	0.0	0.0	0.0	0.0	0.0	74.0	0.0	0.0
5e7fcf8ceb9beccd04f6ee6a16d31f9c	k__Bacteria; p__Firmicutes; c__Clostridia; o__Clostridiales; f__Ruminococcaceae	0.0	0.0	0.0	0.0	0.0	17.0	0.0	0.0	0.0	67.0	42.0	0.0	0.0	0.0	0.0	0.0	0.0	0.0	0.0	0.0	0.0	0.0	0.0	0.0	0.0	0.0	31.0	0.0	17.0	0.0	0.0	0.0	58.0	0.0	0.0	0.0	0.0	0.0	0.0	0.0	0.0	0.0	0.0	0.0	0.0	0.0	0.0	0.0
6aca427f17ad376d7d83b45d2d9e6d8e	k__Bacteria; p__Bacteroidetes; c__Bacteroidia; o__Bacteroidales; f__Bacteroidaceae; g__Bacteroides; s__	0.0	0.0	0.0	0.0	0.0	0.0	0.0	0.0	0.0	0.0	0.0	0.0	0.0	0.0	0.0	0.0	15.0	24.0	0.0	0.0	0.0	0.0	0.0	0.0	0.0	536.0	47.0	0.0	0.0	0.0	0.0	0.0	0.0	0.0	0.0	0.0	0.0	0.0	11.0	0.0	0.0	0.0	0.0	0.0	41.0	0.0	0.0	0.0
947179008df8369f16cc9788e58acb5e	k__Bacteria; p__Bacteroidetes; c__Bacteroidia; o__Bacteroidales; f__Rikenellaceae; g__Alistipes; s__indistinctus	0.0	0.0	0.0	0.0	0.0	0.0	0.0	0.0	0.0	146.0	0.0	0.0	0.0	0.0	0.0	12.0	9.0	0.0	50.0	26.0	0.0	0.0	58.0	0.0	0.0	0.0	0.0	0.0	0.0	0.0	16.0	10.0	0.0	0.0	0.0	50.0	0.0	0.0	0.0	0.0	0.0	23.0	0.0	0.0	0.0	0.0	0.0	0.0
ecf2608598fc14edd83cc324c7446853	k__Bacteria; p__Firmicutes; c__Clostridia; o__Clostridiales; f__Ruminococcaceae	0.0	0.0	0.0	0.0	48.0	0.0	0.0	0.0	0.0	43.0	0.0	0.0	0.0	0.0	0.0	0.0	0.0	0.0	0.0	0.0	0.0	0.0	0.0	0.0	48.0	0.0	0.0	0.0	0.0	0.0	12.0	0.0	0.0	0.0	0.0	0.0	0.0	0.0	0.0	0.0	0.0	0.0	0.0	0.0	0.0	37.0	0.0	0.0
989c7f0fbf0d8b04dde10640ed1b5faa	k__Bacteria; p__Proteobacteria; c__Gammaproteobacteria; o__Enterobacteriales; f__Enterobacteriaceae	0.0	0.0	38.0	0.0	11.0	0.0	15.0	0.0	0.0	0.0	0.0	0.0	0.0	6.0	0.0	0.0	0.0	0.0	0.0	0.0	0.0	0.0	0.0	0.0	11.0	0.0	0.0	0.0	0.0	0.0	8.0	22.0	65.0	0.0	0.0	0.0	0.0	0.0	0.0	0.0	614.0	82.0	0.0	0.0	0.0	0.0	7.0	11.0
dc7ae4ac12e015e5377fbf7ac38a82f3	k__Bacteria; p__Actinobacteria; c__Actinobacteria; o__Bifidobacteriales; f__Bifidobacteriaceae; g__Bifidobacterium; s__longum	0.0	0.0	0.0	0.0	1.0	0.0	25.0	0.0	0.0	15.0	0.0	0.0	13.0	10.0	0.0	0.0	21.0	0.0	1.0	0.0	0.0	0.0	0.0	38.0	2.0	21.0	0.0	0.0	13.0	0.0	0.0	0.0	8.0	0.0	0.0	0.0	0.0	7.0	5.0	0.0	9.0	0.0	0.0	0.0	0.0	29.0	0.0	0.0
f0a9f54ba74f374b5e98b60cb75145ec	k__Bacteria; p__Firmicutes; c__Clostridia; o__Clostridiales; f__Lachnospiraceae; g__Lachnospira; s__	0.0	51.0	0.0	19.0	0.0	21.0	0.0	0.0	0.0	122.0	0.0	67.0	70.0	32.0	0.0	0.0	47.0	207.0	52.0	63.0	0.0	94.0	0.0	0.0	0.0	0.0	108.0	56.0	0.0	0.0	51.0	24.0	0.0	53.0	0.0	187.0	30.0	0.0	55.0	358.0	0.0	31.0	169.0	50.0	312.0	0.0	0.0	42.0
a5d18044f1ff825475eb8ba4f26d2a8e	k__Bacteria; p__Firmicutes; c__Clostridia; o__Clostridiales	0.0	55.0	0.0	0.0	79.0	36.0	36.0	137.0	0.0	49.0	0.0	0.0	0.0	53.0	25.0	0.0	0.0	25.0	52.0	0.0	0.0	0.0	0.0	0.0	0.0	0.0	0.0	47.0	42.0	19.0	21.0	20.0	38.0	29.0	91.0	0.0	58.0	93.0	0.0	0.0	58.0	0.0	57.0	0.0	43.0	43.0	72.0	56.0
03aeb7835355f19be7039fca6b5e6c0e	k__Bacteria; p__Firmicutes; c__Clostridia; o__Clostridiales; f__Ruminococcaceae; g__Ruminococcus; s__	0.0	0.0	0.0	31.0	31.0	0.0	24.0	0.0	29.0	9.0	0.0	0.0	0.0	0.0	0.0	40.0	65.0	0.0	0.0	0.0	0.0	16.0	0.0	0.0	36.0	58.0	0.0	35.0	0.0	0.0	55.0	0.0	58.0	0.0	0.0	34.0	0.0	31.0	0.0	0.0	22.0	0.0	39.0	0.0	0.0	0.0	0.0	57.0
ed0eb7969e47f6a54339729b40f2bf91	k__Bacteria; p__Actinobacteria; c__Coriobacteriia; o__Coriobacteriales; f__Coriobacteriaceae; g__Collinsella; s__aerofaciens	0.0	11.0	0.0	0.0	0.0	38.0	38.0	42.0	49.0	53.0	69.0	70.0	31.0	42.0	22.0	77.0	64.0	0.0	65.0	0.0	192.0	0.0	0.0	85.0	0.0	0.0	0.0	69.0	31.0	0.0	0.0	56.0	30.0	0.0	175.0	9.0	43.0	64.0	0.0	0.0	58.0	36.0	29.0	0.0	0.0	35.0	36.0	428.0
2471cb44a4e8b4602c2b6be1a6d8491d	k__Bacteria; p__Firmicutes; c__Clostridia; o__Clostridiales; f__Ruminococcaceae; g__Oscillospira; s__	0.0	0.0	0.0	0.0	50.0	0.0	0.0	0.0	0.0	0.0	0.0	0.0	0.0	0.0	0.0	0.0	0.0	0.0	0.0	77.0	0.0	0.0	63.0	0.0	0.0	32.0	0.0	0.0	0.0	0.0	68.0	0.0	0.0	0.0	0.0	21.0	61.0	0.0	43.0	0.0	0.0	22.0	34.0	15.0	0.0	0.0	0.0	0.0
1198ca7d76c71521bceb0ce241f45c4c	k__Bacteria; p__Bacteroidetes; c__Bacteroidia; o__Bacteroidales; f__Bacteroidaceae; g__Bacteroides; s__	0.0	0.0	0.0	0.0	0.0	0.0	0.0	218.0	0.0	0.0	0.0	0.0	11.0	4.0	0.0	0.0	0.0	0.0	0.0	0.0	0.0	0.0	0.0	729.0	0.0	0.0	0.0	157.0	0.0	0.0	0.0	0.0	0.0	0.0	1224.0	0.0	0.0	0.0	61.0	0.0	0.0	0.0	0.0	40.0	0.0	0.0	0.0	0.0
756476016e5ab7f0300a6aacf59004e6	k__Bacteria; p__Bacteroidetes; c__Bacteroidia; o__Bacteroidales; f__[Odoribacteraceae]; g__Butyricimonas; s__	0.0	0.0	0.0	0.0	0.0	0.0	0.0	0.0	0.0	0.0	14.0	0.0	54.0	0.0	0.0	0.0	0.0	0.0	0.0	0.0	0.0	0.0	0.0	0.0	0.0	0.0	0.0	0.0	0.0	0.0	0.0	0.0	0.0	0.0	0.0	1.0	0.0	0.0	0.0	0.0	0.0	0.0	0.0	0.0	0.0	0.0	6.0	0.0
36f47ff0a75a4223d0b2343be9e06e50	k__Bacteria; p__Bacteroidetes; c__Bacteroidia; o__Bacteroidales; f__Rikenellaceae	14.0	0.0	0.0	0.0	0.0	0.0	0.0	0.0	0.0	27.0	0.0	0.0	0.0	0.0	0.0	14.0	14.0	0.0	0.0	0.0	0.0	0.0	0.0	0.0	46.0	50.0	0.0	0.0	0.0	0.0	0.0	0.0	71.0	0.0	0.0	0.0	53.0	0.0	0.0	0.0	0.0	27.0	32.0	26.0	0.0	43.0	0.0	26.0
1a9838e1a80b663b538f08a0a4c7c1a0	k__Bacteria; p__Firmicutes; c__Clostridia; o__Clostridiales; f__Lachnospiraceae	0.0	0.0	0.0	0.0	0.0	32.0	0.0	0.0	24.0	0.0	0.0	0.0	0.0	0.0	0.0	0.0	54.0	0.0	0.0	0.0	0.0	0.0	0.0	56.0	0.0	0.0	0.0	0.0	0.0	0.0	0.0	0.0	0.0	0.0	0.0	43.0	0.0	0.0	28.0	0.0	0.0	0.0	0.0	0.0	0.0	0.0	0.0	0.0
3004df4dc2f0fb224cb665929c214879	k__Bacteria; p__Proteobacteria; c__Betaproteobacteria; o__Burkholderiales; f__Alcaligenaceae; g__Sutterella; s__	0.0	0.0	0.0	0.0	0.0	28.0	0.0	21.0	17.0	40.0	0.0	186.0	0.0	0.0	0.0	0.0	16.0	0.0	0.0	0.0	0.0	0.0	0.0	16.0	144.0	30.0	55.0	0.0	0.0	0.0	0.0	0.0	28.0	90.0	53.0	48.0	27.0	50.0	0.0	0.0	55.0	37.0	30.0	16.0	0.0	0.0	66.0	0.0
bab3a30cdfaca63f7bfba24195e7a906	k__Bacteria; p__Bacteroidetes; c__Bacteroidia; o__Bacteroidales; f__Bacteroidaceae; g__Bacteroides; s__	0.0	2.0	0.0	0.0	0.0	0.0	0.0	48.0	0.0	0.0	0.0	0.0	0.0	0.0	0.0	0.0	0.0	27.0	0.0	0.0	0.0	0.0	0.0	0.0	0.0	536.0	0.0	20.0	0.0	0.0	0.0	14.0	0.0	0.0	0.0	0.0	477.0	14.0	0.0	561.0	0.0	0.0	0.0	0.0	0.0	0.0	0.0	0.0
941627c6615098c252000c2c02eb762e	k__Bacteria; p__Firmicutes; c__Clostridia; o__Clostridiales; f__Lachnospiraceae	0.0	28.0	0.0	0.0	0.0	0.0	0.0	0.0	0.0	0.0	60.0	0.0	40.0	0.0	0.0	0.0	0.0	0.0	0.0	0.0	0.0	0.0	0.0	0.0	0.0	0.0	28.0	0.0	0.0	0.0	46.0	0.0	0.0	0.0	29.0	0.0	0.0	0.0	0.0	0.0	0.0	0.0	0.0	0.0	0.0	0.0	0.0	0.0
9937e4110bf0e4f3c4ddd3911734058e	k__Bacteria; p__Firmicutes; c__Clostridia; o__Clostridiales; f__Lachnospiraceae; g__Blautia; s__	0.0	0.0	0.0	0.0	0.0	0.0	52.0	0.0	0.0	0.0	0.0	0.0	0.0	0.0	0.0	11.0	61.0	0.0	0.0	0.0	0.0	0.0	0.0	0.0	0.0	0.0	0.0	57.0	0.0	0.0	36.0	0.0	46.0	0.0	28.0	14.0	22.0	22.0	81.0	0.0	9.0	31.0	46.0	0.0	0.0	0.0	15.0	23.0
b10dbea443e0620f427da92007928591	k__Bacteria; p__Firmicutes; c__Clostridia; o__Clostridiales; f__Ruminococcaceae; g__Ruminococcus; s__callidus	44.0	0.0	0.0	0.0	0.0	0.0	0.0	0.0	0.0	0.0	0.0	27.0	0.0	30.0	0.0	56.0	0.0	0.0	0.0	0.0	0.0	0.0	0.0	0.0	0.0	0.0	0.0	0.0	0.0	0.0	0.0	0.0	0.0	0.0	0.0	0.0	0.0	0.0	46.0	0.0	0.0	0.0	0.0	0.0	0.0	0.0	0.0	0.0
925244b78b434094a104422a05123beb	k__Bacteria; p__Firmicutes; c__Clostridia; o__Clostridiales; f__Clostridiaceae; g__Clostridium; s__celatum	0.0	0.0	0.0	0.0	0.0	0.0	0.0	16.0	0.0	0.0	0.0	0.0	0.0	0.0	0.0	0.0	0.0	0.0	0.0	0.0	0.0	0.0	0.0	35.0	0.0	0.0	0.0	0.0	0.0	0.0	0.0	0.0	26.0	0.0	0.0	0.0	0.0	0.0	0.0	0.0	0.0	0.0	0.0	0.0	0.0	0.0	10.0	0.0
ab1d0af176511a224dc3b6e9db5ede84	k__Bacteria; p__Firmicutes; c__Clostridia; o__Clostridiales; f__Ruminococcaceae; g__Anaerotruncus; s__	0.0	0.0	0.0	0.0	0.0	0.0	0.0	0.0	0.0	0.0	0.0	0.0	0.0	0.0	0.0	0.0	0.0	0.0	0.0	0.0	0.0	0.0	0.0	0.0	0.0	0.0	0.0	0.0	0.0	0.0	0.0	24.0	0.0	0.0	37.0	0.0	0.0	0.0	0.0	0.0	0.0	0.0	0.0	0.0	0.0	0.0	0.0	0.0
30d405ecc3e0143524521181870bc271	k__Bacteria; p__Bacteroidetes; c__Bacteroidia; o__Bacteroidales; f__[Barnesiellaceae]	0.0	0.0	0.0	0.0	593.0	0.0	0.0	0.0	0.0	0.0	0.0	0.0	0.0	0.0	0.0	0.0	0.0	0.0	0.0	0.0	0.0	0.0	0.0	0.0	187.0	373.0	0.0	0.0	0.0	0.0	0.0	0.0	0.0	0.0	221.0	0.0	0.0	1028.0	82.0	0.0	0.0	0.0	0.0	0.0	0.0	0.0	0.0	0.0
de4d0c1f1492b847a52c592fbd942f6a	k__Bacteria; p__Firmicutes; c__Clostridia; o__Clostridiales; f__Ruminococcaceae; g__Oscillospira; s__	0.0	0.0	0.0	0.0	0.0	0.0	0.0	0.0	0.0	26.0	0.0	0.0	0.0	0.0	0.0	0.0	0.0	0.0	0.0	0.0	0.0	0.0	0.0	0.0	0.0	0.0	0.0	0.0	0.0	0.0	32.0	36.0	0.0	0.0	0.0	0.0	0.0	0.0	0.0	0.0	0.0	0.0	0.0	0.0	0.0	0.0	0.0	0.0
4d49e809168dd4f3a23669bc06cd574b	k__Bacteria; p__Firmicutes; c__Clostridia; o__Clostridiales; f__Lachnospiraceae	0.0	0.0	0.0	0.0	30.0	0.0	0.0	0.0	0.0	0.0	0.0	0.0	0.0	0.0	0.0	0.0	0.0	0.0	0.0	0.0	0.0	0.0	0.0	0.0	0.0	0.0	0.0	0.0	0.0	0.0	0.0	0.0	0.0	0.0	0.0	0.0	27.0	15.0	0.0	0.0	0.0	0.0	0.0	0.0	0.0	0.0	0.0	46.0
5d7ff8b66e688bea69567fb8b767b2b4	k__Bacteria; p__Firmicutes; c__Clostridia; o__Clostridiales; f__Lachnospiraceae; g__; s__	0.0	0.0	0.0	0.0	0.0	0.0	0.0	0.0	0.0	27.0	0.0	41.0	0.0	0.0	63.0	37.0	19.0	0.0	0.0	0.0	0.0	0.0	0.0	65.0	0.0	54.0	0.0	53.0	0.0	0.0	0.0	0.0	0.0	0.0	0.0	0.0	18.0	0.0	0.0	0.0	0.0	0.0	0.0	0.0	0.0	0.0	0.0	0.0
a7b3af2553b3db5086bd754692fd208c	k__Bacteria; p__Bacteroidetes; c__Bacteroidia; o__Bacteroidales; f__[Paraprevotellaceae]; g__Paraprevotella; s__	0.0	0.0	0.0	0.0	0.0	0.0	0.0	19.0	0.0	17.0	0.0	0.0	0.0	0.0	0.0	0.0	27.0	0.0	0.0	0.0	0.0	0.0	0.0	0.0	0.0	0.0	0.0	0.0	21.0	0.0	0.0	0.0	0.0	0.0	0.0	0.0	0.0	0.0	15.0	0.0	0.0	0.0	0.0	0.0	0.0	0.0	0.0	0.0
51fa5e0979a407d1b937808fb21c481a	k__Bacteria; p__Firmicutes; c__Clostridia; o__Clostridiales; f__Lachnospiraceae	0.0	43.0	0.0	0.0	0.0	0.0	0.0	0.0	0.0	0.0	0.0	0.0	0.0	0.0	0.0	0.0	25.0	0.0	0.0	0.0	0.0	0.0	0.0	0.0	0.0	13.0	0.0	0.0	0.0	0.0	0.0	44.0	0.0	0.0	22.0	0.0	0.0	0.0	0.0	0.0	0.0	0.0	7.0	0.0	0.0	0.0	0.0	9.0
d5e33227ac8d2ddf6501094bbd81f2e7	k__Bacteria; p__Firmicutes; c__Clostridia; o__Clostridiales; f__Ruminococcaceae; g__Ruminococcus; s__	0.0	0.0	0.0	0.0	0.0	19.0	0.0	0.0	0.0	0.0	0.0	0.0	0.0	0.0	0.0	0.0	0.0	0.0	0.0	0.0	0.0	0.0	0.0	0.0	0.0	0.0	0.0	0.0	0.0	0.0	0.0	0.0	62.0	0.0	0.0	0.0	0.0	0.0	0.0	0.0	0.0	0.0	0.0	0.0	0.0	81.0	0.0	0.0
96216cb0db9c42d167fbb8da8d16c1c6	k__Bacteria; p__Bacteroidetes; c__Bacteroidia; o__Bacteroidales; f__Bacteroidaceae; g__Bacteroides; s__	0.0	0.0	0.0	0.0	0.0	0.0	288.0	0.0	0.0	0.0	0.0	0.0	0.0	0.0	0.0	0.0	0.0	0.0	0.0	0.0	0.0	0.0	0.0	0.0	0.0	0.0	0.0	0.0	40.0	195.0	0.0	0.0	0.0	0.0	0.0	74.0	0.0	0.0	0.0	0.0	0.0	0.0	0.0	0.0	0.0	0.0	0.0	0.0
01a45cc60047aa5c046c6cbee59e4436	k__Bacteria; p__Bacteroidetes; c__Bacteroidia; o__Bacteroidales; f__Bacteroidaceae; g__Bacteroides; s__	0.0	0.0	0.0	0.0	0.0	0.0	0.0	0.0	0.0	0.0	0.0	0.0	0.0	0.0	0.0	0.0	0.0	0.0	0.0	0.0	0.0	25.0	0.0	0.0	0.0	0.0	0.0	0.0	0.0	0.0	0.0	0.0	0.0	0.0	0.0	15.0	0.0	0.0	28.0	0.0	0.0	0.0	0.0	0.0	0.0	0.0	0.0	0.0
51bd163566c90a0bc46170a85d82b434	k__Bacteria; p__Firmicutes; c__Clostridia; o__Clostridiales; f__Christensenellaceae; g__; s__	0.0	0.0	0.0	0.0	0.0	0.0	0.0	0.0	0.0	12.0	0.0	0.0	0.0	0.0	0.0	20.0	0.0	0.0	0.0	0.0	0.0	0.0	0.0	0.0	0.0	0.0	0.0	0.0	0.0	0.0	0.0	0.0	0.0	0.0	0.0	0.0	0.0	0.0	0.0	0.0	0.0	0.0	0.0	0.0	0.0	0.0	0.0	0.0
a773751986787d8f900b57867a1dc040	k__Bacteria; p__Firmicutes; c__Erysipelotrichi; o__Erysipelotrichales; f__Erysipelotrichaceae; g__[Eubacterium]; s__biforme	0.0	0.0	0.0	0.0	0.0	0.0	0.0	0.0	0.0	20.0	0.0	0.0	0.0	0.0	0.0	0.0	0.0	50.0	0.0	0.0	0.0	0.0	0.0	0.0	0.0	0.0	38.0	0.0	0.0	0.0	0.0	0.0	0.0	0.0	0.0	0.0	0.0	0.0	0.0	0.0	0.0	103.0	0.0	16.0	0.0	0.0	0.0	0.0
d2c7aa83505b6b7000f958948346ac70	k__Bacteria; p__Firmicutes; c__Clostridia; o__Clostridiales; f__Lachnospiraceae; g__Lachnobacterium; s__	18.0	0.0	0.0	0.0	0.0	0.0	0.0	0.0	41.0	0.0	0.0	0.0	0.0	0.0	0.0	0.0	0.0	0.0	0.0	0.0	0.0	0.0	0.0	0.0	0.0	33.0	0.0	0.0	0.0	34.0	0.0	0.0	0.0	0.0	0.0	0.0	0.0	0.0	0.0	50.0	0.0	0.0	0.0	0.0	0.0	0.0	0.0	123.0
456bbc77a5d4f445ac3ab57c9a26cae3	k__Bacteria; p__Firmicutes; c__Clostridia; o__Clostridiales; f__Lachnospiraceae; g__Lachnospira; s__	0.0	0.0	0.0	27.0	0.0	69.0	0.0	0.0	49.0	117.0	0.0	49.0	52.0	44.0	76.0	48.0	0.0	184.0	55.0	50.0	0.0	0.0	0.0	486.0	0.0	141.0	168.0	104.0	0.0	76.0	0.0	28.0	56.0	0.0	0.0	36.0	11.0	57.0	0.0	0.0	0.0	44.0	0.0	48.0	235.0	65.0	33.0	0.0
7acfb03534b1b6170db6a24c3431fd8c	k__Bacteria; p__Bacteroidetes; c__Bacteroidia; o__Bacteroidales; f__Bacteroidaceae; g__Bacteroides; s__	0.0	0.0	0.0	0.0	0.0	88.0	0.0	0.0	0.0	18.0	0.0	0.0	0.0	6.0	0.0	0.0	0.0	0.0	0.0	0.0	0.0	0.0	0.0	0.0	0.0	0.0	39.0	34.0	0.0	0.0	0.0	0.0	29.0	0.0	0.0	0.0	0.0	0.0	87.0	0.0	0.0	0.0	0.0	0.0	0.0	0.0	0.0	0.0
82cd2f4225c1705ba28ffae3da713bf3	k__Bacteria; p__Firmicutes; c__Clostridia; o__Clostridiales; f__Clostridiaceae; g__; s__	0.0	59.0	0.0	0.0	42.0	46.0	0.0	0.0	0.0	0.0	0.0	0.0	0.0	37.0	0.0	0.0	0.0	0.0	0.0	54.0	0.0	0.0	0.0	45.0	0.0	0.0	34.0	0.0	0.0	0.0	0.0	0.0	0.0	0.0	28.0	0.0	30.0	0.0	0.0	0.0	0.0	0.0	0.0	0.0	0.0	0.0	0.0	0.0
a424e7c1745baae766bae91895179969	k__Bacteria; p__Proteobacteria; c__Gammaproteobacteria; o__Enterobacteriales; f__Enterobacteriaceae; g__Serratia; s__	0.0	0.0	0.0	0.0	0.0	0.0	0.0	0.0	0.0	0.0	0.0	0.0	0.0	0.0	0.0	0.0	0.0	0.0	0.0	0.0	0.0	0.0	0.0	0.0	0.0	0.0	0.0	0.0	0.0	0.0	0.0	0.0	0.0	0.0	0.0	0.0	0.0	0.0	0.0	0.0	16.0	0.0	0.0	0.0	0.0	0.0	0.0	13.0
fdef309752b5766023bff5997ff6bb86	k__Bacteria; p__Firmicutes; c__Clostridia; o__Clostridiales; f__Ruminococcaceae	0.0	0.0	0.0	0.0	0.0	0.0	0.0	0.0	0.0	0.0	0.0	0.0	0.0	0.0	0.0	0.0	0.0	0.0	0.0	26.0	0.0	0.0	0.0	0.0	0.0	0.0	15.0	0.0	43.0	0.0	32.0	0.0	0.0	0.0	0.0	0.0	0.0	0.0	0.0	0.0	0.0	0.0	38.0	0.0	0.0	0.0	0.0	0.0
3331f1dd4246e6609a582f889f797dc5	k__Bacteria; p__Firmicutes; c__Clostridia; o__Clostridiales; f__Ruminococcaceae; g__Ruminococcus; s__	0.0	60.0	0.0	36.0	49.0	0.0	31.0	0.0	67.0	25.0	0.0	0.0	0.0	0.0	0.0	48.0	36.0	0.0	29.0	0.0	0.0	0.0	0.0	0.0	29.0	48.0	0.0	32.0	0.0	0.0	35.0	36.0	37.0	0.0	0.0	70.0	63.0	47.0	0.0	0.0	14.0	0.0	16.0	0.0	0.0	0.0	0.0	66.0
a26efa7b1c6ada04ff64cd71f2535994	k__Bacteria; p__Firmicutes; c__Clostridia; o__Clostridiales; f__; g__; s__	0.0	0.0	0.0	0.0	0.0	53.0	0.0	0.0	0.0	0.0	0.0	37.0	0.0	0.0	0.0	0.0	0.0	0.0	0.0	0.0	0.0	0.0	0.0	0.0	0.0	0.0	0.0	0.0	0.0	0.0	0.0	66.0	0.0	0.0	0.0	0.0	0.0	0.0	0.0	0.0	0.0	0.0	0.0	34.0	0.0	0.0	0.0	0.0
f37c654d663641031c85457ecf00fb8c	k__Bacteria; p__Firmicutes; c__Clostridia; o__Clostridiales; f__Ruminococcaceae; g__Oscillospira; s__	52.0	63.0	0.0	0.0	0.0	101.0	0.0	0.0	0.0	0.0	47.0	144.0	79.0	72.0	0.0	32.0	300.0	53.0	0.0	0.0	0.0	0.0	0.0	0.0	0.0	0.0	31.0	0.0	113.0	0.0	0.0	200.0	192.0	0.0	0.0	464.0	0.0	77.0	0.0	0.0	0.0	266.0	26.0	58.0	30.0	0.0	90.0	0.0
95b38bad9c5ed1980e2c40a0556fd655	k__Bacteria; p__Firmicutes; c__Clostridia; o__Clostridiales; f__Ruminococcaceae	0.0	0.0	0.0	0.0	0.0	0.0	0.0	0.0	0.0	0.0	0.0	0.0	0.0	0.0	0.0	0.0	0.0	0.0	0.0	0.0	0.0	0.0	0.0	0.0	0.0	0.0	0.0	0.0	0.0	0.0	0.0	0.0	0.0	0.0	20.0	0.0	0.0	0.0	0.0	0.0	0.0	0.0	0.0	0.0	0.0	14.0	0.0	0.0
379d2504ebcb703a7e348bf26cb26331	k__Bacteria; p__Firmicutes; c__Clostridia; o__Clostridiales; f__Lachnospiraceae; g__Coprococcus; s__catus	0.0	0.0	0.0	0.0	0.0	0.0	0.0	39.0	0.0	0.0	0.0	0.0	0.0	0.0	0.0	0.0	0.0	0.0	0.0	0.0	0.0	0.0	0.0	0.0	0.0	0.0	36.0	0.0	0.0	0.0	0.0	0.0	0.0	0.0	14.0	0.0	0.0	0.0	0.0	0.0	0.0	15.0	0.0	0.0	0.0	0.0	0.0	0.0
61b87bf3b6ff96a519b6aaf713e6e48c	k__Bacteria; p__Firmicutes; c__Clostridia; o__Clostridiales; f__Ruminococcaceae; g__Gemmiger; s__formicilis	0.0	0.0	0.0	0.0	0.0	28.0	0.0	0.0	0.0	0.0	0.0	32.0	0.0	71.0	0.0	0.0	0.0	0.0	38.0	48.0	0.0	0.0	0.0	0.0	0.0	52.0	0.0	0.0	42.0	0.0	32.0	0.0	0.0	63.0	119.0	48.0	49.0	32.0	0.0	47.0	0.0	0.0	0.0	49.0	0.0	0.0	0.0	0.0
aefe30096aec151d9d1a791a2dbc3a3c	k__Bacteria; p__Bacteroidetes; c__Bacteroidia; o__Bacteroidales; f__Bacteroidaceae; g__Bacteroides; s__	0.0	0.0	0.0	0.0	43.0	0.0	0.0	448.0	0.0	0.0	0.0	0.0	7.0	9.0	0.0	0.0	0.0	0.0	0.0	0.0	0.0	0.0	0.0	1018.0	17.0	0.0	0.0	231.0	0.0	0.0	0.0	0.0	0.0	0.0	1318.0	0.0	0.0	0.0	79.0	0.0	0.0	0.0	0.0	51.0	0.0	0.0	0.0	0.0
8e03af4dddbaf9f310048ea0a7770869	k__Bacteria; p__Firmicutes; c__Bacilli; o__Lactobacillales; f__Streptococcaceae; g__Streptococcus	0.0	0.0	8.0	0.0	0.0	0.0	43.0	0.0	0.0	0.0	0.0	0.0	0.0	18.0	0.0	0.0	0.0	0.0	0.0	0.0	0.0	0.0	0.0	0.0	32.0	0.0	0.0	0.0	0.0	0.0	0.0	0.0	0.0	0.0	0.0	0.0	0.0	23.0	0.0	0.0	28.0	0.0	0.0	0.0	0.0	0.0	0.0	2.0
245b2357f08f89555455b868fe833bf0	k__Bacteria; p__Bacteroidetes; c__Bacteroidia; o__Bacteroidales; f__Bacteroidaceae; g__Bacteroides; s__ovatus	0.0	0.0	0.0	16.0	0.0	0.0	24.0	0.0	11.0	0.0	0.0	0.0	0.0	0.0	0.0	0.0	0.0	0.0	48.0	13.0	0.0	0.0	0.0	0.0	0.0	17.0	0.0	0.0	0.0	0.0	0.0	0.0	0.0	0.0	135.0	31.0	13.0	0.0	0.0	0.0	0.0	0.0	73.0	0.0	0.0	3.0	0.0	0.0
5371b70a20180078d7e47573b50ef455	k__Bacteria; p__Bacteroidetes; c__Bacteroidia; o__Bacteroidales; f__Bacteroidaceae; g__Bacteroides; s__	0.0	0.0	0.0	0.0	0.0	0.0	0.0	0.0	0.0	0.0	0.0	0.0	0.0	26.0	0.0	0.0	0.0	0.0	0.0	0.0	0.0	0.0	0.0	0.0	0.0	0.0	0.0	0.0	0.0	25.0	0.0	0.0	62.0	0.0	0.0	46.0	0.0	1276.0	0.0	0.0	0.0	0.0	0.0	0.0	0.0	0.0	0.0	0.0
a260c0b21b177e5ef5d9b8c63ceb37cc	k__Bacteria; p__Proteobacteria; c__Alphaproteobacteria; o__RF32; f__; g__; s__	0.0	0.0	0.0	0.0	0.0	0.0	0.0	0.0	0.0	0.0	52.0	0.0	0.0	0.0	0.0	32.0	0.0	0.0	50.0	0.0	0.0	0.0	0.0	0.0	0.0	0.0	0.0	0.0	0.0	0.0	0.0	0.0	0.0	0.0	0.0	84.0	0.0	0.0	0.0	0.0	0.0	37.0	0.0	0.0	0.0	0.0	0.0	0.0
55248d5b068c99375c102e68de469b62	k__Bacteria; p__Actinobacteria; c__Actinobacteria; o__Bifidobacteriales; f__Bifidobacteriaceae; g__Bifidobacterium; s__longum	0.0	0.0	48.0	0.0	120.0	21.0	39.0	0.0	27.0	33.0	0.0	42.0	0.0	0.0	0.0	35.0	0.0	0.0	57.0	28.0	64.0	37.0	0.0	0.0	36.0	0.0	0.0	0.0	0.0	0.0	0.0	0.0	0.0	0.0	0.0	0.0	0.0	0.0	0.0	0.0	60.0	0.0	40.0	0.0	0.0	0.0	0.0	0.0
5733b2d98b5bf8d2382d2798eb0b8eaa	k__Bacteria; p__Firmicutes; c__Clostridia; o__Clostridiales; f__Lachnospiraceae; g__Blautia; s__	0.0	0.0	0.0	0.0	0.0	53.0	0.0	26.0	21.0	76.0	0.0	12.0	0.0	25.0	0.0	25.0	0.0	0.0	45.0	0.0	0.0	0.0	0.0	44.0	24.0	24.0	75.0	0.0	0.0	0.0	52.0	0.0	0.0	0.0	14.0	16.0	35.0	19.0	0.0	0.0	21.0	26.0	0.0	0.0	22.0	0.0	33.0	23.0
1ba82eecd00fd3c688d79bb39d6ef7b6	k__Bacteria; p__Bacteroidetes; c__Bacteroidia; o__Bacteroidales; f__Porphyromonadaceae; g__Parabacteroides; s__	39.0	27.0	0.0	0.0	438.0	35.0	14.0	146.0	0.0	200.0	33.0	0.0	48.0	73.0	90.0	25.0	49.0	58.0	103.0	85.0	618.0	0.0	0.0	218.0	147.0	0.0	136.0	0.0	61.0	0.0	0.0	117.0	0.0	64.0	961.0	538.0	1099.0	90.0	142.0	0.0	662.0	100.0	245.0	47.0	83.0	0.0	21.0	0.0
16bddd0e0f34c7f7f51f12e9fd732b93	k__Bacteria; p__Firmicutes; c__Clostridia; o__Clostridiales; f__Lachnospiraceae; g__Anaerostipes; s__	0.0	0.0	0.0	53.0	0.0	0.0	40.0	0.0	0.0	0.0	0.0	0.0	0.0	0.0	0.0	0.0	0.0	64.0	58.0	0.0	46.0	0.0	0.0	0.0	0.0	0.0	0.0	36.0	54.0	0.0	0.0	0.0	54.0	0.0	85.0	0.0	0.0	0.0	64.0	0.0	0.0	0.0	45.0	0.0	95.0	0.0	0.0	0.0
3e672b4b6c3afabd84f2a9271d2ab75d	k__Bacteria; p__Firmicutes; c__Clostridia; o__Clostridiales; f__Ruminococcaceae; g__Oscillospira; s__	0.0	0.0	0.0	0.0	0.0	0.0	0.0	0.0	0.0	0.0	0.0	0.0	0.0	0.0	0.0	0.0	0.0	0.0	0.0	0.0	0.0	0.0	0.0	0.0	0.0	36.0	25.0	0.0	0.0	0.0	0.0	0.0	0.0	0.0	0.0	20.0	35.0	0.0	0.0	0.0	0.0	0.0	0.0	0.0	0.0	0.0	0.0	17.0
ce56be39a4bab345a91495a9345742f8	k__Bacteria; p__Firmicutes; c__Clostridia; o__Clostridiales; f__Lachnospiraceae; g__Coprococcus; s__	0.0	0.0	0.0	40.0	19.0	0.0	20.0	0.0	0.0	0.0	0.0	0.0	0.0	0.0	0.0	0.0	0.0	0.0	0.0	0.0	0.0	0.0	0.0	0.0	28.0	0.0	0.0	0.0	0.0	0.0	0.0	0.0	0.0	0.0	0.0	0.0	0.0	0.0	0.0	0.0	0.0	0.0	0.0	18.0	0.0	6.0	0.0	0.0
9e60d4a21ff8cf996f13d13e4b1daf19	k__Bacteria; p__Firmicutes; c__Clostridia; o__Clostridiales; f__Lachnospiraceae; g__Lachnospira; s__	0.0	0.0	0.0	0.0	0.0	32.0	0.0	0.0	0.0	0.0	0.0	45.0	0.0	0.0	0.0	68.0	0.0	43.0	0.0	51.0	0.0	158.0	0.0	52.0	0.0	0.0	49.0	0.0	0.0	0.0	35.0	0.0	0.0	0.0	0.0	0.0	0.0	23.0	52.0	0.0	0.0	32.0	0.0	0.0	0.0	0.0	0.0	53.0
edf85ff1d5c2496aa10644587c587ae6	k__Bacteria; p__Bacteroidetes; c__Bacteroidia; o__Bacteroidales; f__Bacteroidaceae; g__Bacteroides; s__	0.0	345.0	0.0	0.0	47.0	0.0	0.0	55.0	81.0	8.0	18.0	0.0	15.0	0.0	24.0	0.0	8.0	30.0	175.0	110.0	0.0	0.0	190.0	46.0	0.0	0.0	57.0	11.0	0.0	18.0	134.0	19.0	0.0	22.0	69.0	0.0	183.0	0.0	25.0	75.0	0.0	0.0	0.0	0.0	0.0	0.0	8.0	0.0
fa173af53a352509e3ee52822ad8026d	k__Bacteria; p__Firmicutes; c__Clostridia; o__Clostridiales; f__[Mogibacteriaceae]; g__; s__	0.0	0.0	0.0	0.0	0.0	0.0	0.0	0.0	0.0	0.0	0.0	0.0	25.0	0.0	0.0	0.0	0.0	0.0	0.0	0.0	0.0	0.0	0.0	0.0	0.0	0.0	0.0	0.0	0.0	0.0	0.0	0.0	0.0	0.0	20.0	0.0	0.0	66.0	0.0	0.0	0.0	0.0	0.0	0.0	0.0	0.0	0.0	19.0
ad20f7701317aea3f84b10d1550b14a0	k__Bacteria; p__Bacteroidetes; c__Bacteroidia; o__Bacteroidales; f__Bacteroidaceae; g__Bacteroides; s__plebeius	0.0	18.0	0.0	0.0	0.0	163.0	0.0	80.0	0.0	0.0	0.0	0.0	563.0	120.0	269.0	6.0	84.0	80.0	0.0	0.0	0.0	0.0	0.0	0.0	0.0	0.0	0.0	0.0	9.0	0.0	0.0	0.0	0.0	0.0	0.0	0.0	0.0	0.0	107.0	0.0	0.0	0.0	0.0	0.0	302.0	0.0	13.0	0.0
7f08afc0c886546571b891bd272ef06b	k__Bacteria; p__Firmicutes; c__Clostridia; o__Clostridiales; f__Christensenellaceae; g__; s__	0.0	36.0	0.0	0.0	0.0	0.0	0.0	0.0	0.0	35.0	0.0	0.0	0.0	0.0	0.0	0.0	0.0	0.0	0.0	0.0	0.0	0.0	0.0	0.0	0.0	34.0	0.0	0.0	0.0	15.0	0.0	0.0	0.0	0.0	21.0	41.0	0.0	0.0	0.0	0.0	0.0	30.0	0.0	0.0	0.0	0.0	0.0	0.0
b11c363c5a2d5c9a6190ba06be2b98dc	k__Bacteria; p__Actinobacteria; c__Coriobacteriia; o__Coriobacteriales; f__Coriobacteriaceae; g__; s__	0.0	0.0	0.0	0.0	0.0	0.0	0.0	0.0	0.0	0.0	0.0	15.0	0.0	0.0	0.0	0.0	53.0	0.0	0.0	0.0	0.0	0.0	0.0	0.0	0.0	0.0	0.0	0.0	0.0	0.0	0.0	0.0	0.0	9.0	52.0	0.0	0.0	71.0	0.0	0.0	0.0	0.0	0.0	0.0	0.0	0.0	0.0	0.0
6da7624da6317ae144a1e45d1f80423b	k__Bacteria; p__Firmicutes; c__Clostridia; o__Clostridiales; f__Lachnospiraceae; g__Lachnospira; s__	0.0	0.0	0.0	0.0	0.0	0.0	0.0	0.0	0.0	0.0	0.0	0.0	0.0	0.0	0.0	0.0	0.0	14.0	0.0	0.0	0.0	6.0	0.0	0.0	0.0	22.0	5.0	0.0	0.0	0.0	0.0	0.0	0.0	0.0	0.0	0.0	0.0	0.0	0.0	0.0	0.0	0.0	4.0	0.0	0.0	0.0	0.0	0.0
a45bb471f541dc71487534ef6d428073	k__Bacteria; p__Proteobacteria; c__Betaproteobacteria; o__Burkholderiales; f__Alcaligenaceae; g__Sutterella; s__	0.0	0.0	0.0	0.0	0.0	0.0	0.0	0.0	0.0	44.0	0.0	0.0	0.0	0.0	0.0	0.0	0.0	0.0	0.0	0.0	0.0	0.0	0.0	49.0	0.0	0.0	30.0	0.0	0.0	0.0	0.0	0.0	0.0	0.0	12.0	0.0	34.0	0.0	0.0	27.0	0.0	0.0	17.0	0.0	31.0	0.0	0.0	0.0
7991a8582bc401bf7310c4dfd5f7335b	k__Bacteria; p__Firmicutes; c__Clostridia; o__Clostridiales; f__Lachnospiraceae; g__Roseburia; s__	0.0	0.0	0.0	0.0	0.0	0.0	0.0	0.0	0.0	0.0	0.0	42.0	0.0	0.0	35.0	41.0	31.0	0.0	0.0	67.0	0.0	0.0	23.0	51.0	0.0	83.0	30.0	0.0	61.0	0.0	67.0	0.0	0.0	0.0	124.0	0.0	0.0	0.0	81.0	0.0	0.0	0.0	0.0	82.0	0.0	0.0	0.0	276.0
def669b8d18695a18acd049bf316b9c1	k__Bacteria; p__Firmicutes; c__Clostridia; o__Clostridiales; f__Ruminococcaceae	0.0	0.0	0.0	0.0	0.0	0.0	0.0	42.0	0.0	29.0	0.0	0.0	0.0	0.0	0.0	0.0	0.0	0.0	33.0	0.0	0.0	0.0	0.0	34.0	0.0	0.0	0.0	0.0	0.0	0.0	0.0	0.0	0.0	0.0	16.0	0.0	0.0	0.0	0.0	0.0	0.0	0.0	0.0	0.0	0.0	0.0	0.0	44.0
e6dc0b924f7d9c97cf074f7faa544deb	k__Bacteria; p__Firmicutes; c__Clostridia; o__Clostridiales; f__Lachnospiraceae; g__Anaerostipes; s__	0.0	0.0	0.0	0.0	0.0	0.0	0.0	0.0	0.0	0.0	0.0	0.0	0.0	0.0	0.0	0.0	63.0	0.0	0.0	0.0	0.0	0.0	0.0	0.0	29.0	0.0	0.0	0.0	0.0	0.0	63.0	0.0	0.0	0.0	0.0	0.0	0.0	0.0	0.0	0.0	0.0	0.0	0.0	0.0	0.0	0.0	0.0	0.0
f76df343a60226b85a7b561ab3dfc237	k__Bacteria; p__Firmicutes; c__Bacilli; o__Lactobacillales; f__Streptococcaceae; g__Streptococcus; s__	0.0	0.0	0.0	0.0	0.0	0.0	0.0	0.0	18.0	0.0	0.0	0.0	0.0	0.0	0.0	0.0	0.0	0.0	0.0	0.0	0.0	0.0	0.0	0.0	0.0	0.0	0.0	0.0	0.0	0.0	0.0	0.0	0.0	0.0	0.0	0.0	0.0	11.0	0.0	0.0	27.0	0.0	0.0	0.0	25.0	0.0	0.0	14.0
025a4288e3a74b1d2c0b160bcf7ce21a	k__Bacteria; p__Firmicutes; c__Clostridia; o__Clostridiales; f__Ruminococcaceae; g__Oscillospira; s__	0.0	49.0	0.0	0.0	0.0	0.0	0.0	30.0	0.0	0.0	0.0	0.0	0.0	0.0	0.0	0.0	0.0	0.0	0.0	0.0	0.0	0.0	0.0	0.0	0.0	0.0	0.0	0.0	0.0	0.0	44.0	0.0	0.0	0.0	64.0	9.0	0.0	0.0	0.0	0.0	0.0	0.0	0.0	0.0	0.0	0.0	0.0	0.0
fa43b4a49fd632f80343a11199f86926	k__Bacteria; p__Firmicutes; c__Clostridia; o__Clostridiales; f__Ruminococcaceae	0.0	0.0	0.0	0.0	0.0	0.0	8.0	11.0	0.0	22.0	17.0	0.0	45.0	0.0	0.0	0.0	0.0	0.0	0.0	0.0	0.0	0.0	0.0	0.0	0.0	0.0	0.0	0.0	0.0	0.0	23.0	0.0	0.0	0.0	5.0	0.0	0.0	0.0	0.0	0.0	0.0	0.0	0.0	0.0	0.0	0.0	0.0	25.0
90527097c7970ab9767294e2957fb99b	k__Bacteria; p__Firmicutes; c__Clostridia; o__Clostridiales; f__Ruminococcaceae	0.0	0.0	0.0	0.0	0.0	24.0	0.0	0.0	0.0	23.0	0.0	0.0	0.0	0.0	0.0	0.0	0.0	0.0	23.0	0.0	0.0	0.0	0.0	0.0	0.0	0.0	0.0	0.0	0.0	0.0	0.0	0.0	0.0	0.0	57.0	0.0	35.0	66.0	0.0	0.0	0.0	0.0	0.0	0.0	0.0	0.0	0.0	0.0
328134030affd2ad06dd7cc093473dc3	k__Bacteria; p__Firmicutes; c__Clostridia; o__Clostridiales; f__Lachnospiraceae; g__Clostridium; s__aldenense	0.0	0.0	0.0	0.0	53.0	0.0	0.0	0.0	0.0	0.0	0.0	0.0	0.0	0.0	0.0	0.0	0.0	0.0	0.0	0.0	0.0	0.0	28.0	0.0	0.0	0.0	0.0	0.0	0.0	0.0	0.0	0.0	0.0	0.0	0.0	0.0	0.0	0.0	0.0	0.0	0.0	64.0	0.0	0.0	0.0	0.0	0.0	20.0
e718dcdd513d4f8cfc619b75abfd8372	k__Bacteria; p__Firmicutes; c__Clostridia; o__Clostridiales; f__Lachnospiraceae; g__Coprococcus; s__eutactus	18.0	0.0	0.0	0.0	0.0	56.0	0.0	0.0	0.0	0.0	0.0	122.0	55.0	68.0	0.0	0.0	0.0	34.0	0.0	0.0	0.0	0.0	0.0	0.0	0.0	0.0	39.0	0.0	42.0	0.0	0.0	0.0	0.0	0.0	0.0	69.0	0.0	0.0	0.0	0.0	0.0	0.0	0.0	0.0	0.0	0.0	0.0	0.0
f7fef27969fcdb5e7ffcdf421d27d224	k__Bacteria; p__Bacteroidetes; c__Bacteroidia; o__Bacteroidales; f__Bacteroidaceae; g__Bacteroides; s__	0.0	0.0	0.0	0.0	0.0	0.0	34.0	0.0	0.0	0.0	0.0	0.0	27.0	26.0	0.0	0.0	0.0	0.0	27.0	58.0	51.0	0.0	124.0	0.0	0.0	0.0	18.0	0.0	0.0	0.0	0.0	0.0	0.0	0.0	0.0	57.0	0.0	0.0	57.0	0.0	0.0	0.0	0.0	34.0	0.0	0.0	0.0	158.0
3aba3b5283625f466c8e07e78bf09b82	k__Bacteria; p__Bacteroidetes; c__Bacteroidia; o__Bacteroidales; f__Bacteroidaceae; g__Bacteroides; s__	0.0	0.0	0.0	0.0	0.0	155.0	0.0	0.0	0.0	36.0	0.0	0.0	0.0	13.0	0.0	0.0	0.0	0.0	0.0	0.0	0.0	0.0	0.0	0.0	0.0	0.0	25.0	13.0	0.0	0.0	0.0	0.0	39.0	0.0	0.0	0.0	0.0	0.0	0.0	0.0	0.0	0.0	0.0	0.0	0.0	0.0	0.0	0.0
91f878a655871e121317624b02e9f2c3	k__Bacteria; p__Firmicutes; c__Clostridia; o__Clostridiales; f__Ruminococcaceae	0.0	0.0	0.0	0.0	0.0	0.0	0.0	0.0	0.0	29.0	28.0	0.0	0.0	0.0	0.0	45.0	72.0	96.0	0.0	0.0	0.0	0.0	0.0	0.0	0.0	0.0	102.0	40.0	138.0	0.0	0.0	0.0	0.0	0.0	73.0	0.0	161.0	54.0	0.0	458.0	0.0	72.0	0.0	0.0	313.0	42.0	0.0	0.0
1569a7736ba393e6e0807f546745460e	k__Bacteria; p__Firmicutes; c__Clostridia; o__Clostridiales; f__Lachnospiraceae	0.0	0.0	0.0	0.0	0.0	0.0	0.0	0.0	0.0	0.0	0.0	0.0	0.0	0.0	28.0	0.0	0.0	0.0	0.0	0.0	0.0	0.0	0.0	0.0	0.0	0.0	0.0	0.0	0.0	0.0	0.0	0.0	0.0	0.0	48.0	0.0	0.0	0.0	101.0	0.0	0.0	0.0	0.0	0.0	0.0	0.0	0.0	34.0
8797db2c0b1987ecc7ae06008c2f2d0d	k__Bacteria; p__Firmicutes; c__Clostridia; o__Clostridiales; f__Lachnospiraceae; g__Coprococcus; s__	0.0	0.0	5.0	37.0	12.0	0.0	0.0	0.0	28.0	0.0	0.0	0.0	0.0	0.0	0.0	0.0	0.0	0.0	18.0	0.0	0.0	36.0	23.0	52.0	0.0	0.0	0.0	0.0	0.0	0.0	27.0	0.0	0.0	0.0	0.0	0.0	0.0	47.0	0.0	0.0	0.0	0.0	37.0	0.0	0.0	0.0	0.0	0.0
45b97d61c211bc1e1ef3ee5d8f9f71e0	k__Bacteria; p__Firmicutes; c__Clostridia; o__Clostridiales; f__Lachnospiraceae; g__Roseburia	33.0	146.0	0.0	113.0	30.0	193.0	15.0	242.0	0.0	945.0	0.0	229.0	74.0	25.0	103.0	0.0	34.0	25.0	161.0	0.0	173.0	33.0	0.0	277.0	1175.0	85.0	43.0	81.0	0.0	39.0	0.0	22.0	59.0	0.0	375.0	91.0	54.0	0.0	36.0	0.0	0.0	0.0	134.0	119.0	104.0	57.0	62.0	0.0
cb046e17f12e0d35b98e1d7bd4b1c260	k__Bacteria; p__Actinobacteria; c__Actinobacteria; o__Bifidobacteriales; f__Bifidobacteriaceae; g__Bifidobacterium; s__bifidum	0.0	0.0	0.0	0.0	0.0	0.0	17.0	0.0	45.0	0.0	0.0	0.0	0.0	0.0	0.0	0.0	0.0	0.0	0.0	0.0	0.0	0.0	0.0	0.0	0.0	0.0	0.0	47.0	0.0	0.0	0.0	0.0	43.0	0.0	0.0	0.0	43.0	0.0	0.0	0.0	33.0	0.0	0.0	0.0	0.0	0.0	74.0	0.0
7390fe3b6a5d4c0e69f036205d3e8f87	k__Bacteria; p__Firmicutes; c__Clostridia; o__Clostridiales; f__Lachnospiraceae	0.0	0.0	0.0	0.0	0.0	0.0	0.0	0.0	0.0	0.0	0.0	34.0	0.0	23.0	0.0	0.0	0.0	0.0	0.0	0.0	0.0	0.0	0.0	0.0	0.0	0.0	0.0	81.0	0.0	0.0	9.0	0.0	0.0	0.0	87.0	19.0	0.0	0.0	0.0	0.0	0.0	0.0	0.0	0.0	0.0	0.0	0.0	70.0
a218dcfd77ba357b00ad2834bb7f18ae	k__Bacteria; p__Bacteroidetes; c__Bacteroidia; o__Bacteroidales; f__Bacteroidaceae; g__Bacteroides; s__	0.0	79.0	0.0	0.0	0.0	0.0	0.0	0.0	79.0	67.0	9.0	0.0	0.0	0.0	32.0	0.0	4.0	0.0	61.0	0.0	0.0	0.0	0.0	0.0	0.0	149.0	21.0	0.0	0.0	0.0	0.0	0.0	0.0	0.0	0.0	0.0	0.0	104.0	57.0	0.0	0.0	29.0	0.0	68.0	41.0	0.0	0.0	0.0
694f576a171418cf50b6f4e5a74728de	k__Bacteria; p__Firmicutes; c__Clostridia; o__Clostridiales; f__Lachnospiraceae; g__Blautia; s__	0.0	0.0	0.0	0.0	0.0	38.0	22.0	19.0	0.0	16.0	0.0	45.0	0.0	21.0	26.0	55.0	42.0	0.0	52.0	0.0	0.0	0.0	0.0	30.0	28.0	83.0	34.0	37.0	0.0	36.0	58.0	0.0	0.0	0.0	50.0	12.0	0.0	27.0	0.0	0.0	37.0	0.0	17.0	30.0	0.0	0.0	0.0	47.0
19ec4952f8fb9b28aa494a963981d0bf	k__Bacteria; p__Firmicutes; c__Clostridia; o__Clostridiales; f__Ruminococcaceae; g__Ruminococcus; s__	21.0	0.0	0.0	0.0	57.0	37.0	0.0	0.0	51.0	0.0	0.0	0.0	37.0	0.0	0.0	53.0	0.0	0.0	55.0	44.0	0.0	0.0	0.0	0.0	0.0	177.0	0.0	0.0	0.0	45.0	0.0	0.0	0.0	0.0	0.0	1339.0	0.0	0.0	0.0	109.0	0.0	0.0	51.0	0.0	0.0	0.0	0.0	0.0
9d51b21f03d1265e12c205f09a394209	k__Bacteria; p__Firmicutes; c__Clostridia; o__Clostridiales; f__Ruminococcaceae; g__Oscillospira; s__	0.0	0.0	0.0	0.0	0.0	0.0	0.0	0.0	0.0	0.0	11.0	0.0	0.0	0.0	0.0	0.0	0.0	0.0	0.0	0.0	0.0	47.0	0.0	0.0	0.0	0.0	0.0	0.0	7.0	0.0	0.0	0.0	0.0	0.0	0.0	0.0	0.0	0.0	6.0	0.0	0.0	0.0	0.0	0.0	0.0	0.0	0.0	8.0
d0e2879e83d812094371818b377b6b8c	k__Bacteria; p__Firmicutes; c__Clostridia; o__Clostridiales; f__Lachnospiraceae; g__Coprococcus; s__eutactus	0.0	0.0	0.0	0.0	0.0	0.0	0.0	0.0	0.0	102.0	0.0	0.0	0.0	0.0	0.0	0.0	0.0	30.0	0.0	75.0	0.0	0.0	0.0	95.0	0.0	0.0	0.0	0.0	45.0	0.0	43.0	0.0	0.0	0.0	0.0	0.0	0.0	0.0	0.0	0.0	0.0	0.0	0.0	0.0	54.0	0.0	0.0	0.0
26b486ebe7af87c080d6e332173065d1	k__Bacteria; p__Bacteroidetes; c__Bacteroidia; o__Bacteroidales; f__Porphyromonadaceae; g__Parabacteroides; s__	0.0	0.0	0.0	0.0	0.0	0.0	0.0	0.0	0.0	0.0	0.0	0.0	0.0	0.0	0.0	0.0	49.0	0.0	0.0	0.0	0.0	0.0	0.0	0.0	0.0	0.0	0.0	0.0	0.0	0.0	0.0	0.0	61.0	0.0	0.0	0.0	0.0	0.0	0.0	32.0	0.0	0.0	0.0	0.0	0.0	0.0	0.0	0.0
0cffb7f67eea9448730700d8d295c081	k__Bacteria; p__Bacteroidetes; c__Bacteroidia; o__Bacteroidales; f__Bacteroidaceae; g__Bacteroides; s__ovatus	0.0	15.0	0.0	25.0	15.0	0.0	0.0	0.0	24.0	0.0	31.0	46.0	0.0	0.0	0.0	96.0	9.0	0.0	0.0	11.0	0.0	80.0	0.0	0.0	0.0	5.0	9.0	0.0	0.0	2.0	0.0	30.0	28.0	0.0	2.0	17.0	29.0	0.0	46.0	0.0	0.0	0.0	32.0	31.0	0.0	14.0	0.0	0.0
158ece1a11afd340fbe4eabf1437fc15	k__Bacteria; p__Bacteroidetes; c__Bacteroidia; o__Bacteroidales; f__Bacteroidaceae; g__Bacteroides; s__fragilis	0.0	0.0	80.0	0.0	0.0	0.0	17.0	0.0	0.0	0.0	0.0	48.0	0.0	0.0	0.0	42.0	0.0	0.0	0.0	0.0	0.0	0.0	108.0	0.0	0.0	0.0	0.0	14.0	0.0	18.0	11.0	0.0	0.0	0.0	0.0	0.0	646.0	45.0	0.0	94.0	0.0	0.0	0.0	0.0	0.0	0.0	0.0	34.0
829b027aaf8349deccca4988c4bcab3e	k__Bacteria; p__Firmicutes; c__Clostridia; o__Clostridiales; f__Veillonellaceae; g__Veillonella; s__parvula	0.0	0.0	0.0	0.0	0.0	0.0	12.0	0.0	73.0	0.0	0.0	0.0	0.0	0.0	0.0	0.0	0.0	0.0	0.0	0.0	0.0	0.0	0.0	0.0	0.0	0.0	0.0	0.0	0.0	0.0	0.0	0.0	0.0	0.0	0.0	0.0	0.0	0.0	0.0	0.0	0.0	0.0	0.0	0.0	28.0	0.0	0.0	15.0
3a99ac8a3056f993fe8ed040472d41f8	k__Bacteria; p__Firmicutes; c__Clostridia; o__Clostridiales; f__Veillonellaceae; g__Dialister; s__	0.0	0.0	0.0	56.0	0.0	0.0	18.0	0.0	0.0	0.0	0.0	31.0	0.0	0.0	0.0	0.0	0.0	0.0	34.0	0.0	59.0	35.0	0.0	0.0	45.0	2.0	26.0	0.0	0.0	0.0	0.0	0.0	0.0	25.0	0.0	0.0	0.0	0.0	0.0	0.0	0.0	0.0	41.0	0.0	0.0	24.0	0.0	27.0
8eabe169e70754a61b3296d4544d1a15	k__Bacteria; p__Bacteroidetes; c__Bacteroidia; o__Bacteroidales; f__Prevotellaceae; g__Prevotella; s__	20.0	0.0	0.0	0.0	0.0	0.0	8.0	0.0	0.0	0.0	0.0	0.0	0.0	0.0	0.0	36.0	70.0	0.0	0.0	0.0	0.0	0.0	0.0	0.0	0.0	0.0	0.0	0.0	0.0	0.0	0.0	0.0	0.0	0.0	141.0	20.0	0.0	0.0	0.0	0.0	0.0	0.0	188.0	0.0	0.0	0.0	0.0	94.0
1dbff774a0a024a23acaeb6749eb0aae	k__Bacteria; p__Firmicutes; c__Clostridia; o__Clostridiales; f__Ruminococcaceae; g__Gemmiger; s__formicilis	0.0	0.0	0.0	0.0	0.0	0.0	0.0	0.0	51.0	0.0	19.0	0.0	0.0	0.0	0.0	0.0	0.0	0.0	0.0	0.0	0.0	0.0	0.0	0.0	0.0	194.0	0.0	0.0	0.0	0.0	28.0	0.0	0.0	0.0	0.0	0.0	0.0	0.0	0.0	0.0	103.0	0.0	108.0	41.0	0.0	0.0	0.0	0.0
28f1c55bf2a8b61b0594126571f78748	k__Bacteria; p__Firmicutes; c__Clostridia; o__Clostridiales; f__Lachnospiraceae; g__Roseburia; s__	0.0	0.0	0.0	0.0	0.0	27.0	71.0	0.0	46.0	0.0	0.0	0.0	0.0	67.0	0.0	0.0	0.0	0.0	55.0	0.0	30.0	0.0	55.0	0.0	0.0	0.0	0.0	124.0	0.0	62.0	32.0	0.0	0.0	62.0	335.0	0.0	0.0	29.0	0.0	0.0	117.0	0.0	0.0	0.0	39.0	0.0	58.0	17.0
d2c7b57fcb12e400ec3efeb21a14fd23	k__Bacteria; p__Firmicutes; c__Clostridia; o__Clostridiales; f__Lachnospiraceae; g__Coprococcus; s__	0.0	0.0	24.0	0.0	0.0	0.0	0.0	0.0	5.0	0.0	0.0	0.0	0.0	0.0	0.0	0.0	0.0	0.0	6.0	0.0	0.0	0.0	0.0	0.0	0.0	0.0	0.0	0.0	0.0	0.0	2.0	0.0	0.0	0.0	0.0	0.0	0.0	23.0	0.0	0.0	0.0	0.0	7.0	0.0	0.0	0.0	0.0	0.0
10cfdc1a8d82f7d039729d4c1ee210c8	k__Bacteria; p__Firmicutes; c__Clostridia; o__Clostridiales; f__Lachnospiraceae; g__; s__	0.0	0.0	0.0	0.0	0.0	0.0	0.0	0.0	0.0	0.0	0.0	0.0	0.0	0.0	0.0	23.0	0.0	0.0	0.0	0.0	0.0	0.0	34.0	0.0	0.0	0.0	0.0	0.0	0.0	43.0	0.0	0.0	0.0	0.0	0.0	0.0	0.0	0.0	0.0	0.0	0.0	0.0	0.0	0.0	0.0	0.0	0.0	0.0
c310be7d6a5fe40de2deb25cb21eddb7	k__Bacteria; p__Bacteroidetes; c__Bacteroidia; o__Bacteroidales; f__Rikenellaceae; g__; s__	0.0	21.0	0.0	0.0	38.0	0.0	0.0	0.0	20.0	20.0	27.0	0.0	0.0	0.0	7.0	0.0	0.0	0.0	0.0	0.0	0.0	0.0	0.0	0.0	0.0	29.0	0.0	0.0	0.0	0.0	0.0	0.0	0.0	0.0	42.0	0.0	87.0	52.0	0.0	0.0	0.0	23.0	5.0	25.0	0.0	0.0	51.0	0.0
3a2e715f5ed94a6dd12a8a2127aa9c40	k__Bacteria; p__Bacteroidetes; c__Bacteroidia; o__Bacteroidales; f__Bacteroidaceae; g__Bacteroides; s__	0.0	3.0	0.0	0.0	0.0	0.0	0.0	22.0	0.0	0.0	0.0	0.0	0.0	0.0	0.0	0.0	0.0	21.0	0.0	0.0	0.0	0.0	0.0	0.0	0.0	680.0	0.0	30.0	0.0	0.0	0.0	13.0	0.0	0.0	0.0	0.0	506.0	16.0	0.0	568.0	0.0	0.0	0.0	0.0	0.0	0.0	0.0	0.0
0aeae3eec4fd64300cf65ab03587f15d	k__Bacteria; p__Firmicutes; c__Clostridia; o__Clostridiales; f__Lachnospiraceae; g__Blautia; s__	0.0	63.0	0.0	0.0	0.0	0.0	0.0	54.0	18.0	59.0	0.0	26.0	0.0	29.0	0.0	22.0	0.0	0.0	33.0	0.0	0.0	0.0	0.0	33.0	24.0	20.0	44.0	0.0	0.0	0.0	37.0	0.0	0.0	0.0	23.0	18.0	9.0	34.0	0.0	0.0	14.0	25.0	0.0	0.0	11.0	0.0	29.0	25.0
c2fbdde25aba850486b43f6cab4aac24	k__Bacteria; p__Firmicutes; c__Clostridia; o__Clostridiales; f__Lachnospiraceae; g__; s__	0.0	0.0	0.0	0.0	0.0	0.0	35.0	0.0	36.0	0.0	0.0	42.0	0.0	0.0	0.0	0.0	0.0	0.0	0.0	0.0	0.0	88.0	55.0	44.0	0.0	0.0	0.0	0.0	25.0	53.0	30.0	0.0	0.0	59.0	276.0	33.0	26.0	0.0	33.0	130.0	0.0	0.0	0.0	55.0	70.0	35.0	98.0	62.0
e4dcd4cde67f446ad4b92a1801f2a612	k__Bacteria; p__Firmicutes; c__Clostridia; o__Clostridiales; f__Clostridiaceae; g__; s__	0.0	44.0	0.0	0.0	0.0	40.0	0.0	0.0	0.0	0.0	0.0	0.0	0.0	30.0	0.0	33.0	91.0	0.0	0.0	0.0	0.0	0.0	0.0	41.0	0.0	0.0	63.0	0.0	0.0	0.0	0.0	0.0	57.0	0.0	36.0	0.0	70.0	18.0	0.0	0.0	0.0	62.0	0.0	0.0	0.0	0.0	0.0	0.0
bbd0526e9646a6466fe998e3343b6e3a	k__Bacteria; p__Firmicutes; c__Clostridia; o__Clostridiales; f__Lachnospiraceae	0.0	0.0	0.0	0.0	0.0	82.0	0.0	0.0	0.0	0.0	0.0	0.0	0.0	0.0	0.0	0.0	0.0	32.0	0.0	49.0	0.0	0.0	0.0	0.0	0.0	0.0	43.0	0.0	0.0	0.0	0.0	0.0	0.0	0.0	0.0	17.0	82.0	0.0	29.0	0.0	0.0	0.0	0.0	0.0	0.0	0.0	0.0	33.0
262fedda35f6e3859f9563a7fe434b35	k__Bacteria; p__Firmicutes; c__Clostridia; o__Clostridiales; f__Lachnospiraceae; g__Clostridium	0.0	0.0	0.0	0.0	81.0	0.0	0.0	0.0	60.0	67.0	0.0	0.0	0.0	0.0	0.0	67.0	22.0	0.0	0.0	0.0	0.0	0.0	0.0	0.0	61.0	0.0	0.0	0.0	0.0	21.0	0.0	0.0	0.0	0.0	0.0	0.0	0.0	0.0	0.0	0.0	121.0	6.0	0.0	0.0	0.0	95.0	0.0	44.0
45a5abfda4cd2b3fd23b98b780332c38	k__Bacteria; p__Firmicutes; c__Clostridia; o__Clostridiales; f__Lachnospiraceae; g__; s__	0.0	0.0	0.0	0.0	0.0	0.0	0.0	0.0	0.0	0.0	0.0	0.0	0.0	0.0	0.0	31.0	0.0	0.0	0.0	0.0	0.0	0.0	0.0	0.0	0.0	0.0	0.0	0.0	0.0	23.0	0.0	0.0	0.0	0.0	0.0	0.0	9.0	5.0	0.0	0.0	0.0	0.0	0.0	0.0	0.0	0.0	0.0	24.0
f6af05630c1ff85f70299135d9804093	k__Bacteria; p__Proteobacteria; c__Gammaproteobacteria; o__Pasteurellales; f__Pasteurellaceae; g__Haemophilus; s__parainfluenzae	0.0	0.0	0.0	0.0	0.0	0.0	0.0	14.0	78.0	0.0	0.0	0.0	0.0	0.0	29.0	0.0	0.0	0.0	0.0	26.0	0.0	0.0	0.0	0.0	0.0	0.0	0.0	0.0	0.0	0.0	0.0	41.0	0.0	0.0	0.0	0.0	38.0	0.0	0.0	0.0	0.0	0.0	17.0	0.0	62.0	0.0	0.0	38.0
06d9fe242743d6a1911f0ad014aebb75	k__Bacteria; p__Actinobacteria; c__Actinobacteria; o__Bifidobacteriales; f__Bifidobacteriaceae; g__Bifidobacterium; s__longum	0.0	0.0	44.0	0.0	97.0	13.0	0.0	0.0	28.0	0.0	0.0	38.0	0.0	0.0	0.0	25.0	0.0	0.0	29.0	70.0	48.0	55.0	0.0	0.0	39.0	0.0	0.0	0.0	0.0	0.0	0.0	0.0	0.0	0.0	32.0	0.0	0.0	0.0	0.0	0.0	52.0	0.0	0.0	0.0	0.0	0.0	0.0	0.0
7144f86f3948f3593422cf75a8d6a447	k__Bacteria; p__Firmicutes; c__Clostridia; o__Clostridiales; f__Ruminococcaceae; g__Ruminococcus; s__	0.0	0.0	0.0	0.0	35.0	0.0	0.0	0.0	80.0	0.0	23.0	0.0	0.0	0.0	0.0	38.0	0.0	0.0	33.0	0.0	0.0	0.0	0.0	0.0	0.0	0.0	0.0	0.0	0.0	0.0	0.0	0.0	0.0	0.0	0.0	0.0	31.0	0.0	0.0	0.0	0.0	0.0	0.0	0.0	0.0	0.0	0.0	0.0
a38925186de60ca9376d37127428b6fc	k__Bacteria; p__Bacteroidetes; c__Bacteroidia; o__Bacteroidales; f__Bacteroidaceae; g__Bacteroides; s__	0.0	14.0	0.0	0.0	0.0	212.0	9.0	0.0	101.0	0.0	24.0	0.0	0.0	0.0	0.0	0.0	19.0	0.0	0.0	0.0	0.0	0.0	0.0	0.0	0.0	0.0	0.0	0.0	0.0	0.0	14.0	0.0	9.0	0.0	0.0	0.0	0.0	0.0	0.0	15.0	0.0	0.0	0.0	0.0	13.0	0.0	0.0	0.0
80e98d2ca8e2f1842e945dcbe1b4f23e	k__Bacteria; p__Firmicutes; c__Clostridia; o__Clostridiales; f__Christensenellaceae; g__; s__	0.0	39.0	0.0	0.0	0.0	0.0	0.0	0.0	0.0	0.0	0.0	55.0	0.0	0.0	0.0	0.0	0.0	63.0	0.0	0.0	0.0	0.0	0.0	0.0	35.0	0.0	0.0	0.0	57.0	25.0	0.0	69.0	0.0	0.0	20.0	24.0	33.0	0.0	0.0	0.0	0.0	32.0	0.0	0.0	55.0	0.0	0.0	0.0
c89fc1de38e4805092cce3f71433c483	k__Bacteria; p__Firmicutes; c__Clostridia; o__Clostridiales; f__Lachnospiraceae; g__Blautia; s__	18.0	0.0	0.0	0.0	0.0	0.0	0.0	0.0	0.0	40.0	0.0	0.0	0.0	89.0	43.0	0.0	45.0	0.0	0.0	0.0	0.0	0.0	0.0	0.0	0.0	0.0	0.0	0.0	85.0	0.0	0.0	0.0	0.0	0.0	132.0	0.0	75.0	0.0	0.0	0.0	0.0	36.0	0.0	0.0	23.0	0.0	0.0	84.0
49b158e5093fb3bdc5db099825146dfb	k__Bacteria; p__Firmicutes; c__Clostridia; o__Clostridiales; f__Ruminococcaceae; g__Ruminococcus; s__	0.0	0.0	0.0	0.0	0.0	0.0	0.0	0.0	0.0	0.0	0.0	0.0	0.0	0.0	0.0	0.0	0.0	0.0	14.0	0.0	0.0	0.0	0.0	0.0	0.0	0.0	0.0	0.0	0.0	0.0	0.0	60.0	0.0	0.0	29.0	0.0	0.0	0.0	0.0	0.0	0.0	0.0	0.0	26.0	0.0	0.0	0.0	0.0
e69fe30ed449ca567334da92b05a5de5	k__Bacteria; p__Firmicutes; c__Clostridia; o__Clostridiales; f__Lachnospiraceae; g__; s__	0.0	0.0	0.0	0.0	0.0	0.0	0.0	0.0	0.0	56.0	0.0	0.0	0.0	0.0	72.0	84.0	0.0	0.0	0.0	0.0	22.0	0.0	0.0	0.0	0.0	0.0	0.0	0.0	0.0	0.0	24.0	24.0	0.0	0.0	0.0	0.0	43.0	32.0	0.0	0.0	0.0	0.0	0.0	0.0	0.0	0.0	0.0	45.0
5611219e358cae2e272f99bb4869bb29	k__Bacteria; p__Bacteroidetes; c__Bacteroidia; o__Bacteroidales; f__Prevotellaceae; g__Prevotella; s__copri	0.0	0.0	0.0	0.0	0.0	0.0	0.0	252.0	0.0	152.0	0.0	0.0	0.0	0.0	0.0	0.0	0.0	0.0	0.0	0.0	0.0	0.0	0.0	0.0	0.0	0.0	1.0	0.0	37.0	0.0	0.0	0.0	0.0	0.0	0.0	0.0	0.0	0.0	0.0	0.0	0.0	0.0	0.0	0.0	0.0	0.0	0.0	0.0
9ff3c05ee43fad5db7a32b80983fbd6c	k__Bacteria; p__Actinobacteria; c__Coriobacteriia; o__Coriobacteriales; f__Coriobacteriaceae; g__; s__	0.0	0.0	0.0	0.0	56.0	0.0	0.0	0.0	0.0	31.0	59.0	0.0	22.0	0.0	0.0	0.0	0.0	0.0	0.0	0.0	0.0	0.0	0.0	0.0	0.0	0.0	0.0	0.0	0.0	0.0	0.0	0.0	0.0	0.0	0.0	0.0	0.0	0.0	0.0	0.0	0.0	0.0	0.0	0.0	0.0	0.0	0.0	0.0
342697cef716fb859dc071105cbf0d92	k__Bacteria; p__Firmicutes; c__Clostridia; o__Clostridiales; f__Ruminococcaceae	45.0	44.0	0.0	0.0	0.0	40.0	0.0	0.0	0.0	0.0	53.0	40.0	38.0	0.0	0.0	0.0	0.0	0.0	0.0	34.0	0.0	0.0	0.0	0.0	0.0	0.0	0.0	0.0	43.0	18.0	0.0	31.0	66.0	35.0	30.0	36.0	36.0	43.0	0.0	0.0	0.0	93.0	0.0	0.0	25.0	0.0	28.0	0.0
b5cbd615da731fe4e54788967036cb23	k__Bacteria; p__Firmicutes; c__Clostridia; o__Clostridiales	14.0	0.0	0.0	0.0	0.0	46.0	0.0	0.0	0.0	0.0	0.0	0.0	0.0	0.0	0.0	0.0	0.0	0.0	0.0	0.0	0.0	0.0	0.0	0.0	0.0	0.0	0.0	0.0	0.0	0.0	0.0	0.0	0.0	0.0	59.0	0.0	0.0	0.0	0.0	0.0	0.0	49.0	0.0	33.0	0.0	0.0	0.0	0.0
1c827ce0fb8703a17547d5d9a5a7ba36	k__Bacteria; p__Firmicutes; c__Clostridia; o__Clostridiales; f__Clostridiaceae; g__Clostridium; s__	0.0	0.0	0.0	0.0	0.0	0.0	0.0	0.0	0.0	0.0	0.0	0.0	0.0	0.0	0.0	30.0	0.0	0.0	0.0	0.0	0.0	0.0	0.0	0.0	0.0	0.0	0.0	0.0	0.0	0.0	10.0	0.0	0.0	0.0	0.0	0.0	0.0	0.0	0.0	0.0	0.0	0.0	0.0	0.0	0.0	0.0	0.0	28.0
827ab96814677f2ad684d228ef931c0b	k__Bacteria; p__Bacteroidetes; c__Bacteroidia; o__Bacteroidales; f__Bacteroidaceae; g__Bacteroides; s__ovatus	0.0	0.0	0.0	10.0	0.0	0.0	0.0	0.0	26.0	0.0	0.0	0.0	0.0	0.0	0.0	0.0	0.0	0.0	0.0	0.0	0.0	0.0	0.0	0.0	0.0	0.0	0.0	0.0	0.0	0.0	0.0	0.0	0.0	0.0	62.0	0.0	14.0	0.0	0.0	0.0	0.0	0.0	12.0	0.0	0.0	0.0	0.0	0.0
9a4c17285f9b9c0ef42f55c22a5f322e	k__Bacteria; p__Bacteroidetes; c__Bacteroidia; o__Bacteroidales; f__Rikenellaceae; g__Alistipes; s__indistinctus	0.0	0.0	0.0	0.0	0.0	0.0	0.0	0.0	0.0	100.0	0.0	0.0	0.0	0.0	0.0	13.0	20.0	0.0	0.0	0.0	0.0	0.0	0.0	0.0	0.0	0.0	0.0	0.0	0.0	0.0	31.0	14.0	0.0	0.0	0.0	0.0	0.0	0.0	0.0	0.0	0.0	0.0	0.0	0.0	0.0	0.0	0.0	0.0
07c306a6e67ebf888251c0d2c0fbbe7c	k__Bacteria; p__Firmicutes; c__Clostridia; o__Clostridiales; f__Ruminococcaceae; g__Ruminococcus; s__	0.0	0.0	0.0	0.0	20.0	0.0	0.0	0.0	0.0	0.0	0.0	0.0	0.0	0.0	0.0	0.0	0.0	0.0	45.0	0.0	0.0	0.0	0.0	0.0	0.0	0.0	0.0	0.0	0.0	0.0	0.0	0.0	0.0	6.0	0.0	0.0	0.0	21.0	0.0	0.0	0.0	0.0	0.0	0.0	0.0	13.0	0.0	39.0
60bc7f706e489186ce061096abbafab7	k__Bacteria; p__Bacteroidetes; c__Bacteroidia; o__Bacteroidales; f__Bacteroidaceae; g__Bacteroides; s__	0.0	0.0	0.0	0.0	0.0	0.0	0.0	0.0	0.0	0.0	0.0	0.0	0.0	0.0	0.0	0.0	0.0	0.0	0.0	0.0	0.0	22.0	0.0	0.0	0.0	0.0	0.0	0.0	0.0	0.0	0.0	0.0	0.0	0.0	0.0	14.0	0.0	0.0	75.0	0.0	0.0	0.0	0.0	0.0	0.0	0.0	0.0	0.0
0edf215629f2c41e4f50746577268aa4	k__Bacteria; p__Firmicutes; c__Clostridia; o__Clostridiales; f__Lachnospiraceae; g__Coprococcus; s__	0.0	0.0	0.0	19.0	11.0	0.0	15.0	0.0	0.0	0.0	0.0	0.0	0.0	0.0	0.0	0.0	0.0	0.0	0.0	0.0	0.0	0.0	0.0	0.0	28.0	0.0	0.0	0.0	0.0	0.0	0.0	0.0	0.0	0.0	0.0	0.0	0.0	0.0	0.0	0.0	0.0	0.0	0.0	29.0	0.0	11.0	0.0	0.0
156de92efab095e5d84f93cd9dc57038	k__Bacteria; p__Bacteroidetes; c__Bacteroidia; o__Bacteroidales; f__[Barnesiellaceae]; g__; s__	0.0	0.0	0.0	0.0	0.0	0.0	16.0	0.0	0.0	0.0	0.0	0.0	0.0	0.0	0.0	0.0	0.0	0.0	0.0	0.0	0.0	0.0	0.0	0.0	0.0	0.0	0.0	0.0	0.0	0.0	0.0	0.0	0.0	0.0	0.0	0.0	954.0	0.0	0.0	0.0	64.0	109.0	0.0	0.0	0.0	0.0	0.0	0.0
2cb7f34a88f2f1e2f951cb9c19ba3544	k__Bacteria; p__Proteobacteria; c__Gammaproteobacteria; o__Enterobacteriales; f__Enterobacteriaceae; g__Hafnia; s__alvei	0.0	0.0	56.0	0.0	0.0	0.0	0.0	0.0	0.0	7.0	0.0	0.0	0.0	17.0	0.0	0.0	0.0	17.0	0.0	0.0	0.0	0.0	0.0	0.0	0.0	0.0	0.0	0.0	0.0	0.0	0.0	0.0	0.0	0.0	0.0	0.0	0.0	15.0	0.0	0.0	24.0	0.0	0.0	0.0	0.0	0.0	0.0	38.0
b897bf5b1ab5e5c5502db2367a877e7b	k__Bacteria; p__Bacteroidetes; c__Bacteroidia; o__Bacteroidales; f__Bacteroidaceae; g__Bacteroides; s__	0.0	0.0	0.0	0.0	0.0	0.0	0.0	0.0	0.0	0.0	0.0	0.0	0.0	0.0	0.0	0.0	8.0	0.0	0.0	0.0	0.0	0.0	0.0	0.0	0.0	691.0	40.0	0.0	0.0	0.0	0.0	0.0	0.0	0.0	0.0	0.0	0.0	0.0	18.0	0.0	0.0	0.0	0.0	0.0	37.0	0.0	0.0	0.0
a3de2b05465f52d317072c2da1b04794	k__Bacteria; p__Bacteroidetes; c__Bacteroidia; o__Bacteroidales; f__Bacteroidaceae; g__Bacteroides; s__ovatus	0.0	0.0	31.0	0.0	19.0	38.0	0.0	0.0	1.0	45.0	0.0	2.0	0.0	39.0	0.0	0.0	24.0	7.0	0.0	0.0	0.0	61.0	578.0	15.0	0.0	8.0	0.0	0.0	0.0	23.0	0.0	0.0	36.0	0.0	4.0	0.0	0.0	0.0	0.0	0.0	0.0	0.0	18.0	0.0	0.0	32.0	0.0	0.0
b1c37c07b9df2eafd90920027b8c7705	k__Bacteria; p__Actinobacteria; c__Actinobacteria; o__Bifidobacteriales; f__Bifidobacteriaceae; g__Bifidobacterium; s__bifidum	32.0	0.0	0.0	0.0	0.0	0.0	15.0	0.0	33.0	0.0	0.0	0.0	0.0	0.0	0.0	54.0	0.0	12.0	0.0	0.0	0.0	0.0	0.0	0.0	0.0	0.0	0.0	50.0	27.0	0.0	0.0	0.0	0.0	0.0	0.0	0.0	0.0	0.0	0.0	0.0	23.0	0.0	0.0	0.0	0.0	0.0	0.0	0.0
e7821a1504435bb3d4d029b3a985ae58	k__Bacteria; p__Firmicutes; c__Clostridia; o__Clostridiales; f__Ruminococcaceae; g__Gemmiger; s__formicilis	15.0	57.0	0.0	0.0	17.0	47.0	55.0	134.0	214.0	44.0	58.0	92.0	77.0	30.0	23.0	0.0	67.0	37.0	337.0	224.0	0.0	65.0	0.0	60.0	40.0	1187.0	84.0	40.0	70.0	31.0	61.0	34.0	89.0	37.0	231.0	28.0	63.0	71.0	53.0	91.0	57.0	0.0	294.0	49.0	60.0	0.0	32.0	0.0
37c050d673b10944977d2bb37b4e2fc6	k__Bacteria; p__Firmicutes; c__Clostridia; o__Clostridiales; f__Lachnospiraceae; g__Coprococcus; s__	0.0	49.0	0.0	0.0	0.0	32.0	0.0	0.0	51.0	0.0	0.0	0.0	37.0	0.0	0.0	0.0	0.0	0.0	0.0	0.0	0.0	0.0	0.0	0.0	0.0	33.0	68.0	0.0	0.0	0.0	16.0	15.0	0.0	0.0	35.0	45.0	0.0	0.0	0.0	0.0	0.0	0.0	0.0	47.0	0.0	0.0	0.0	0.0
275f759d7bc1ca188984039dc2307814	k__Bacteria; p__Proteobacteria; c__Betaproteobacteria; o__Burkholderiales; f__Alcaligenaceae; g__Sutterella; s__	20.0	0.0	0.0	0.0	0.0	0.0	0.0	0.0	0.0	58.0	0.0	0.0	0.0	41.0	115.0	0.0	0.0	38.0	56.0	0.0	0.0	0.0	260.0	0.0	0.0	0.0	59.0	0.0	47.0	0.0	0.0	24.0	30.0	0.0	72.0	42.0	49.0	0.0	96.0	46.0	0.0	0.0	10.0	17.0	25.0	0.0	41.0	0.0
44071df85b78a5e997c00ae2b2f628aa	k__Bacteria; p__Proteobacteria; c__Betaproteobacteria; o__Burkholderiales; f__Alcaligenaceae; g__Sutterella; s__	0.0	0.0	0.0	0.0	0.0	0.0	0.0	0.0	0.0	0.0	0.0	0.0	0.0	0.0	0.0	0.0	0.0	0.0	0.0	0.0	0.0	0.0	0.0	0.0	0.0	3.0	0.0	9.0	0.0	0.0	6.0	9.0	0.0	0.0	0.0	0.0	0.0	0.0	0.0	0.0	0.0	0.0	0.0	0.0	0.0	0.0	0.0	0.0
36ce4bdd3ab91fea283f9f27f95878de	k__Bacteria; p__Bacteroidetes; c__Bacteroidia; o__Bacteroidales; f__Bacteroidaceae; g__Bacteroides; s__caccae	27.0	0.0	0.0	0.0	0.0	0.0	0.0	0.0	0.0	0.0	0.0	0.0	0.0	0.0	5.0	0.0	0.0	0.0	0.0	0.0	0.0	0.0	0.0	0.0	0.0	0.0	0.0	0.0	0.0	0.0	0.0	0.0	0.0	0.0	0.0	0.0	0.0	85.0	0.0	0.0	0.0	0.0	0.0	0.0	0.0	0.0	0.0	0.0
fb4271389a39af6b017dc9ffb6b2a2a6	k__Bacteria; p__Firmicutes; c__Clostridia; o__Clostridiales; f__Ruminococcaceae; g__Ruminococcus; s__	0.0	0.0	0.0	0.0	0.0	0.0	0.0	0.0	0.0	0.0	0.0	0.0	0.0	0.0	0.0	0.0	0.0	0.0	0.0	0.0	0.0	0.0	0.0	0.0	0.0	0.0	0.0	0.0	0.0	0.0	0.0	0.0	0.0	44.0	0.0	0.0	0.0	0.0	0.0	0.0	0.0	0.0	0.0	0.0	0.0	0.0	0.0	0.0
7b369f1b216534e56ddfe5c90c19f97a	k__Bacteria; p__Proteobacteria; c__Alphaproteobacteria; o__RF32; f__; g__; s__	0.0	133.0	0.0	0.0	0.0	0.0	0.0	0.0	0.0	0.0	0.0	24.0	0.0	0.0	0.0	43.0	0.0	0.0	0.0	0.0	0.0	469.0	0.0	0.0	34.0	39.0	0.0	0.0	0.0	0.0	0.0	0.0	0.0	0.0	39.0	146.0	0.0	0.0	73.0	0.0	0.0	0.0	0.0	0.0	0.0	0.0	0.0	0.0
1bb55dc5e64741048a7703f5ecf60df6	k__Bacteria; p__Firmicutes; c__Clostridia; o__Clostridiales; f__Lachnospiraceae; g__Lachnobacterium; s__	48.0	0.0	0.0	0.0	0.0	0.0	0.0	0.0	47.0	0.0	0.0	0.0	0.0	0.0	0.0	0.0	49.0	0.0	0.0	0.0	0.0	0.0	0.0	0.0	0.0	47.0	0.0	0.0	0.0	28.0	0.0	0.0	0.0	0.0	0.0	0.0	0.0	0.0	0.0	50.0	0.0	0.0	0.0	0.0	0.0	0.0	0.0	136.0
5f6af1981bbb21905109f86aa8abaace	k__Bacteria; p__Firmicutes; c__Clostridia; o__Clostridiales; f__Lachnospiraceae; g__Blautia; s__	0.0	0.0	0.0	0.0	0.0	73.0	48.0	57.0	0.0	41.0	0.0	34.0	0.0	22.0	59.0	22.0	20.0	0.0	51.0	0.0	0.0	0.0	0.0	40.0	34.0	82.0	20.0	41.0	0.0	22.0	26.0	0.0	0.0	0.0	39.0	25.0	0.0	25.0	0.0	0.0	39.0	0.0	33.0	26.0	0.0	0.0	0.0	41.0
629c825a86dcb221a6143bc3f3e63776	k__Bacteria; p__Firmicutes; c__Clostridia; o__Clostridiales; f__Lachnospiraceae	0.0	0.0	0.0	0.0	0.0	18.0	0.0	0.0	0.0	0.0	0.0	0.0	0.0	0.0	0.0	0.0	0.0	0.0	0.0	0.0	0.0	0.0	0.0	0.0	0.0	0.0	0.0	0.0	0.0	0.0	0.0	9.0	0.0	0.0	0.0	0.0	11.0	0.0	0.0	0.0	0.0	10.0	0.0	0.0	0.0	0.0	0.0	0.0
543693a31849fb66933138b8a9e38d12	k__Bacteria; p__Firmicutes; c__Erysipelotrichi; o__Erysipelotrichales; f__Erysipelotrichaceae; g__Catenibacterium; s__	0.0	0.0	0.0	0.0	0.0	0.0	0.0	0.0	0.0	0.0	13.0	0.0	0.0	13.0	0.0	0.0	0.0	0.0	0.0	0.0	0.0	0.0	0.0	0.0	0.0	0.0	0.0	0.0	0.0	0.0	0.0	30.0	64.0	0.0	0.0	0.0	0.0	0.0	0.0	0.0	0.0	0.0	0.0	217.0	0.0	0.0	83.0	0.0
491c061f29ebc39bc5e8d4e518e96c59	k__Bacteria; p__Firmicutes; c__Clostridia; o__Clostridiales; f__Ruminococcaceae; g__Ruminococcus; s__bromii	47.0	0.0	0.0	0.0	37.0	0.0	0.0	0.0	0.0	0.0	0.0	0.0	61.0	0.0	0.0	0.0	0.0	30.0	0.0	0.0	0.0	0.0	0.0	0.0	0.0	0.0	18.0	0.0	0.0	0.0	0.0	55.0	0.0	17.0	0.0	47.0	0.0	0.0	0.0	0.0	0.0	0.0	103.0	0.0	37.0	0.0	15.0	0.0
89e28e774f1464618e145f2b5d793a60	k__Bacteria; p__Firmicutes; c__Clostridia; o__Clostridiales; f__Christensenellaceae; g__; s__	0.0	0.0	0.0	0.0	0.0	0.0	0.0	0.0	0.0	0.0	59.0	0.0	33.0	0.0	0.0	0.0	0.0	6.0	0.0	0.0	0.0	0.0	0.0	0.0	0.0	0.0	43.0	0.0	79.0	0.0	0.0	0.0	0.0	0.0	23.0	16.0	0.0	0.0	0.0	0.0	0.0	33.0	0.0	0.0	0.0	0.0	0.0	0.0
9edf1b930aa62def16d41fa58b5772fd	k__Bacteria; p__Firmicutes; c__Clostridia; o__Clostridiales; f__Ruminococcaceae	0.0	0.0	0.0	0.0	0.0	0.0	0.0	0.0	0.0	0.0	0.0	0.0	0.0	0.0	0.0	0.0	0.0	0.0	0.0	0.0	0.0	0.0	0.0	0.0	0.0	0.0	0.0	0.0	0.0	0.0	0.0	0.0	0.0	12.0	11.0	0.0	0.0	0.0	0.0	0.0	0.0	0.0	0.0	0.0	0.0	0.0	0.0	0.0
e586b39e43306d46c77f3c9c538b37c3	k__Bacteria; p__Firmicutes; c__Clostridia; o__Clostridiales; f__Ruminococcaceae	0.0	0.0	0.0	0.0	0.0	0.0	0.0	0.0	0.0	0.0	0.0	0.0	0.0	0.0	0.0	0.0	0.0	0.0	0.0	0.0	0.0	0.0	0.0	0.0	0.0	0.0	0.0	0.0	0.0	0.0	0.0	0.0	0.0	47.0	41.0	0.0	0.0	0.0	0.0	0.0	0.0	0.0	0.0	0.0	0.0	0.0	0.0	0.0
7df644f2be5c781c45f143284b8270d3	k__Bacteria; p__Firmicutes; c__Clostridia; o__Clostridiales; f__Lachnospiraceae; g__Blautia; s__obeum	0.0	0.0	0.0	0.0	0.0	41.0	0.0	0.0	24.0	42.0	0.0	0.0	0.0	0.0	0.0	52.0	0.0	0.0	0.0	0.0	0.0	0.0	0.0	0.0	0.0	0.0	0.0	0.0	42.0	0.0	70.0	32.0	0.0	22.0	23.0	31.0	28.0	45.0	0.0	0.0	0.0	34.0	75.0	0.0	0.0	0.0	0.0	56.0
4f0efdc1734fd65a2a83c8506fc1bcae	k__Bacteria; p__Bacteroidetes; c__Bacteroidia; o__Bacteroidales; f__Porphyromonadaceae; g__Parabacteroides; s__distasonis	0.0	0.0	0.0	0.0	0.0	0.0	0.0	0.0	48.0	0.0	0.0	0.0	0.0	0.0	0.0	0.0	0.0	0.0	0.0	0.0	0.0	0.0	0.0	0.0	0.0	0.0	0.0	0.0	0.0	0.0	0.0	0.0	0.0	66.0	0.0	70.0	0.0	0.0	0.0	0.0	0.0	0.0	0.0	0.0	0.0	0.0	0.0	0.0
227d9769e23cf4a15b191b5190d73fc1	k__Bacteria; p__Firmicutes; c__Clostridia; o__Clostridiales	0.0	52.0	23.0	25.0	263.0	38.0	33.0	137.0	58.0	49.0	0.0	44.0	23.0	27.0	0.0	34.0	0.0	37.0	15.0	0.0	25.0	0.0	0.0	35.0	17.0	0.0	21.0	88.0	20.0	0.0	19.0	0.0	29.0	0.0	163.0	0.0	62.0	31.0	0.0	0.0	56.0	0.0	18.0	0.0	0.0	0.0	18.0	45.0
6da1a759251196f8df7622abad927701	k__Bacteria; p__Firmicutes; c__Clostridia; o__Clostridiales; f__Christensenellaceae; g__; s__	0.0	0.0	0.0	0.0	0.0	0.0	0.0	0.0	0.0	0.0	0.0	36.0	0.0	0.0	0.0	0.0	0.0	0.0	0.0	0.0	0.0	0.0	0.0	0.0	0.0	0.0	0.0	0.0	0.0	30.0	0.0	0.0	0.0	0.0	38.0	0.0	0.0	44.0	0.0	0.0	0.0	0.0	0.0	0.0	0.0	0.0	0.0	0.0
4058188d2ec232ab126ef7bd261c8b82	k__Bacteria; p__Bacteroidetes; c__Bacteroidia; o__Bacteroidales; f__Rikenellaceae; g__; s__	0.0	0.0	0.0	0.0	63.0	0.0	0.0	0.0	0.0	24.0	0.0	29.0	0.0	0.0	0.0	509.0	70.0	0.0	0.0	0.0	0.0	0.0	0.0	0.0	257.0	32.0	0.0	0.0	0.0	45.0	0.0	0.0	0.0	0.0	17.0	0.0	0.0	0.0	0.0	0.0	0.0	0.0	0.0	0.0	0.0	0.0	22.0	0.0
85c41c2f1e8b3c08ced00839400661b1	k__Bacteria; p__Firmicutes; c__Clostridia; o__Clostridiales; f__Lachnospiraceae; g__Clostridium; s__colinum	0.0	0.0	0.0	0.0	0.0	18.0	0.0	0.0	0.0	0.0	0.0	0.0	0.0	0.0	29.0	29.0	0.0	0.0	0.0	30.0	0.0	0.0	0.0	19.0	0.0	0.0	0.0	0.0	0.0	0.0	0.0	0.0	0.0	0.0	0.0	0.0	0.0	0.0	0.0	0.0	0.0	0.0	0.0	0.0	0.0	0.0	0.0	0.0
8499a9d0e727509f802a0e1fdee15494	k__Bacteria; p__Bacteroidetes; c__Bacteroidia; o__Bacteroidales; f__Bacteroidaceae; g__Bacteroides	48.0	1.0	0.0	0.0	0.0	0.0	0.0	23.0	0.0	0.0	0.0	0.0	0.0	0.0	0.0	0.0	0.0	5.0	0.0	0.0	0.0	0.0	0.0	0.0	0.0	310.0	0.0	15.0	0.0	0.0	0.0	8.0	0.0	0.0	0.0	0.0	244.0	6.0	0.0	332.0	0.0	0.0	0.0	0.0	0.0	0.0	0.0	0.0
019f36e57213e84421a473f7f15d095a	k__Bacteria; p__Firmicutes; c__Clostridia; o__Clostridiales; f__Lachnospiraceae; g__; s__	0.0	0.0	0.0	0.0	0.0	10.0	0.0	0.0	0.0	0.0	0.0	0.0	0.0	0.0	0.0	0.0	43.0	0.0	0.0	0.0	0.0	0.0	0.0	0.0	19.0	32.0	0.0	0.0	0.0	0.0	23.0	0.0	0.0	0.0	18.0	0.0	0.0	0.0	0.0	0.0	0.0	0.0	0.0	0.0	0.0	0.0	0.0	0.0
debed98bc7984576456ce1805ddedb19	k__Bacteria; p__Bacteroidetes; c__Bacteroidia; o__Bacteroidales; f__[Barnesiellaceae]; g__; s__	0.0	0.0	0.0	0.0	0.0	0.0	0.0	0.0	0.0	0.0	0.0	0.0	0.0	0.0	0.0	0.0	0.0	0.0	0.0	0.0	0.0	0.0	35.0	0.0	0.0	52.0	0.0	0.0	0.0	0.0	0.0	0.0	0.0	0.0	0.0	53.0	0.0	0.0	0.0	0.0	0.0	0.0	0.0	0.0	84.0	0.0	0.0	0.0
175c66c5ca5caca2a84eab543812e41c	k__Bacteria; p__Firmicutes; c__Clostridia; o__Clostridiales; f__Lachnospiraceae; g__Coprococcus; s__	0.0	0.0	113.0	0.0	0.0	0.0	0.0	0.0	45.0	0.0	0.0	0.0	0.0	0.0	0.0	0.0	0.0	0.0	27.0	25.0	15.0	0.0	14.0	0.0	0.0	26.0	0.0	0.0	0.0	0.0	28.0	0.0	0.0	0.0	50.0	39.0	0.0	22.0	0.0	0.0	0.0	0.0	46.0	0.0	0.0	0.0	0.0	0.0
5e007a9cb962e45fc67387234f4de519	k__Bacteria; p__Bacteroidetes; c__Bacteroidia; o__Bacteroidales; f__Rikenellaceae; g__Alistipes; s__indistinctus	0.0	17.0	0.0	0.0	0.0	0.0	0.0	0.0	0.0	115.0	0.0	0.0	0.0	0.0	0.0	21.0	12.0	0.0	0.0	0.0	0.0	0.0	0.0	0.0	0.0	0.0	0.0	0.0	0.0	0.0	7.0	0.0	0.0	0.0	0.0	0.0	0.0	0.0	0.0	0.0	0.0	0.0	0.0	0.0	0.0	0.0	0.0	0.0
5db797753fcb7e4a74e7864467c4936f	k__Bacteria; p__Firmicutes; c__Erysipelotrichi; o__Erysipelotrichales; f__Erysipelotrichaceae; g__[Eubacterium]; s__biforme	30.0	0.0	0.0	0.0	0.0	0.0	0.0	0.0	0.0	75.0	15.0	0.0	0.0	144.0	0.0	0.0	0.0	0.0	0.0	0.0	0.0	0.0	0.0	0.0	0.0	0.0	0.0	24.0	0.0	0.0	0.0	0.0	0.0	0.0	0.0	0.0	0.0	0.0	0.0	0.0	0.0	30.0	0.0	0.0	0.0	0.0	0.0	0.0
f397edecb5b8522a722f5261bf66afc8	k__Bacteria; p__Firmicutes; c__Clostridia; o__Clostridiales; f__Lachnospiraceae; g__Clostridium; s__aldenense	0.0	0.0	0.0	0.0	20.0	0.0	0.0	0.0	0.0	0.0	0.0	0.0	0.0	0.0	0.0	0.0	0.0	0.0	0.0	0.0	0.0	0.0	18.0	0.0	0.0	0.0	0.0	0.0	0.0	0.0	0.0	0.0	0.0	0.0	0.0	0.0	0.0	0.0	0.0	0.0	0.0	0.0	0.0	0.0	0.0	0.0	0.0	18.0
2750db1d2a7009090a377867243b0d78	k__Bacteria; p__Firmicutes; c__Clostridia; o__Clostridiales; f__Ruminococcaceae; g__Gemmiger; s__formicilis	25.0	62.0	0.0	0.0	23.0	91.0	111.0	35.0	0.0	33.0	28.0	146.0	0.0	39.0	65.0	197.0	37.0	51.0	101.0	57.0	19.0	61.0	130.0	438.0	97.0	118.0	49.0	37.0	47.0	30.0	101.0	41.0	55.0	80.0	303.0	90.0	32.0	286.0	70.0	241.0	39.0	53.0	425.0	35.0	76.0	0.0	25.0	83.0
11d8bf44636b6b462210f1e092b6d24a	k__Bacteria; p__Bacteroidetes; c__Bacteroidia; o__Bacteroidales; f__Bacteroidaceae; g__Bacteroides; s__	0.0	13.0	0.0	0.0	0.0	198.0	14.0	0.0	73.0	0.0	17.0	0.0	0.0	0.0	0.0	0.0	19.0	0.0	0.0	0.0	0.0	0.0	0.0	0.0	0.0	0.0	0.0	0.0	0.0	0.0	0.0	0.0	0.0	0.0	0.0	0.0	0.0	0.0	0.0	0.0	0.0	0.0	0.0	0.0	17.0	0.0	0.0	0.0
[truncated: 28 more columns]

## Sheet: ID_taxonomy
Custom ID	Taxonomical assignment
feature1	k__Bacteria; p__Bacteroidetes; c__Bacteroidia; o__Bacteroidales; f__Bacteroidaceae; g__Bacteroides; s__uniformis
feature2	k__Bacteria; p__Firmicutes; c__Clostridia; o__Clostridiales; f__Ruminococcaceae; g__; s__
feature3	k__Bacteria; p__Firmicutes; c__Clostridia; o__Clostridiales; f__Ruminococcaceae
feature4	k__Bacteria; p__Bacteroidetes; c__Bacteroidia; o__Bacteroidales; f__[Barnesiellaceae]; g__; s__
feature5	k__Bacteria; p__Bacteroidetes; c__Bacteroidia; o__Bacteroidales; f__Rikenellaceae; g__Alistipes; s__indistinctus
feature6	k__Bacteria; p__Bacteroidetes; c__Bacteroidia; o__Bacteroidales; f__Rikenellaceae
feature7	k__Bacteria; p__Synergistetes; c__Synergistia; o__Synergistales; f__Dethiosulfovibrionaceae; g__Pyramidobacter; s__piscolens
feature8	k__Bacteria; p__Firmicutes; c__Clostridia; o__Clostridiales; f__Ruminococcaceae
feature9	k__Bacteria; p__Proteobacteria; c__Gammaproteobacteria; o__Enterobacteriales; f__Enterobacteriaceae; g__Hafnia; s__alvei
feature10	k__Bacteria; p__Firmicutes; c__Clostridia; o__Clostridiales; f__[Mogibacteriaceae]; g__; s__
feature11	k__Bacteria; p__Bacteroidetes; c__Bacteroidia; o__Bacteroidales; f__Bacteroidaceae; g__Bacteroides; s__
feature12	k__Bacteria; p__Firmicutes; c__Clostridia; o__Clostridiales; f__Lachnospiraceae; g__; s__
feature13	k__Bacteria; p__Bacteroidetes; c__Bacteroidia; o__Bacteroidales; f__Bacteroidaceae; g__Bacteroides; s__ovatus
feature14	k__Bacteria; p__Bacteroidetes; c__Bacteroidia; o__Bacteroidales; f__[Odoribacteraceae]; g__Butyricimonas; s__
feature15	k__Bacteria; p__Bacteroidetes; c__Bacteroidia; o__Bacteroidales; f__Rikenellaceae; g__; s__
feature16	k__Bacteria; p__Bacteroidetes; c__Bacteroidia; o__Bacteroidales; f__Bacteroidaceae; g__Bacteroides; s__
feature17	k__Bacteria; p__Bacteroidetes; c__Bacteroidia; o__Bacteroidales; f__Bacteroidaceae; g__Bacteroides; s__
feature18	k__Bacteria; p__Bacteroidetes; c__Bacteroidia; o__Bacteroidales; f__[Barnesiellaceae]; g__; s__
feature19	k__Bacteria; p__Firmicutes; c__Clostridia; o__Clostridiales; f__Ruminococcaceae; g__Oscillospira; s__
feature20	k__Bacteria; p__Firmicutes; c__Clostridia; o__Clostridiales; f__Peptostreptococcaceae
feature21	k__Bacteria; p__Bacteroidetes; c__Bacteroidia; o__Bacteroidales; f__[Odoribacteraceae]; g__Butyricimonas; s__
feature22	k__Bacteria; p__Proteobacteria; c__Gammaproteobacteria; o__Enterobacteriales; f__Enterobacteriaceae
feature23	k__Bacteria; p__Firmicutes; c__Clostridia; o__Clostridiales; f__Veillonellaceae; g__Dialister; s__
feature24	k__Bacteria; p__Bacteroidetes; c__Bacteroidia; o__Bacteroidales; f__Bacteroidaceae; g__Bacteroides; s__fragilis
feature25	k__Bacteria; p__Actinobacteria; c__Actinobacteria; o__Bifidobacteriales; f__Bifidobacteriaceae; g__Bifidobacterium; s__
feature26	k__Bacteria; p__Firmicutes; c__Clostridia; o__Clostridiales; f__Lachnospiraceae
feature27	k__Bacteria; p__Firmicutes; c__Clostridia; o__Clostridiales; f__Lachnospiraceae; g__Roseburia; s__
feature28	k__Bacteria; p__Firmicutes; c__Bacilli; o__Lactobacillales; f__Streptococcaceae; g__Streptococcus; s__
feature29	k__Bacteria; p__Firmicutes; c__Clostridia; o__Clostridiales; f__Ruminococcaceae
feature30	k__Bacteria; p__Firmicutes; c__Clostridia; o__Clostridiales; f__Ruminococcaceae; g__; s__
feature31	k__Bacteria; p__Firmicutes; c__Clostridia; o__Clostridiales; f__Ruminococcaceae; g__Ruminococcus; s__
feature32	k__Bacteria; p__Firmicutes; c__Clostridia; o__Clostridiales; f__Ruminococcaceae; g__Faecalibacterium; s__prausnitzii
feature33	k__Bacteria; p__Firmicutes; c__Clostridia; o__Clostridiales; f__Lachnospiraceae
feature34	k__Bacteria; p__Firmicutes; c__Clostridia; o__Clostridiales; f__Ruminococcaceae; g__Gemmiger; s__formicilis
feature35	k__Bacteria; p__Firmicutes; c__Clostridia; o__Clostridiales; f__Lachnospiraceae
feature36	k__Bacteria; p__Proteobacteria; c__Betaproteobacteria; o__Burkholderiales; f__Alcaligenaceae; g__Sutterella; s__
feature37	k__Bacteria; p__Bacteroidetes; c__Bacteroidia; o__Bacteroidales; f__Rikenellaceae; g__Alistipes; s__finegoldii
feature38	k__Bacteria; p__Firmicutes; c__Bacilli; o__Turicibacterales; f__Turicibacteraceae; g__Turicibacter; s__
feature39	k__Bacteria; p__Bacteroidetes; c__Bacteroidia; o__Bacteroidales; f__Bacteroidaceae; g__Bacteroides; s__
feature40	k__Bacteria; p__Firmicutes; c__Clostridia; o__Clostridiales; f__Ruminococcaceae
feature41	k__Bacteria; p__Firmicutes; c__Clostridia; o__Clostridiales; f__Lachnospiraceae; g__Coprococcus; s__
feature42	k__Bacteria; p__Bacteroidetes; c__Bacteroidia; o__Bacteroidales; f__Bacteroidaceae; g__Bacteroides; s__caccae
feature43	k__Bacteria; p__Firmicutes; c__Clostridia; o__Clostridiales; f__Ruminococcaceae
feature44	k__Bacteria; p__Firmicutes; c__Clostridia; o__Clostridiales; f__Lachnospiraceae; g__Dorea; s__formicigenerans
feature45	k__Bacteria; p__Firmicutes; c__Clostridia; o__Clostridiales; f__Lachnospiraceae; g__Clostridium; s__colinum
feature46	k__Bacteria; p__Firmicutes; c__Clostridia; o__Clostridiales; f__Lachnospiraceae; g__Blautia; s__
feature47	k__Bacteria; p__Firmicutes; c__Clostridia; o__Clostridiales; f__Ruminococcaceae; g__Oscillospira; s__
feature48	k__Bacteria; p__Firmicutes; c__Clostridia; o__Clostridiales; f__Lachnospiraceae
feature49	k__Bacteria; p__Firmicutes; c__Clostridia; o__Clostridiales; f__Lachnospiraceae; g__; s__
feature50	k__Bacteria; p__Firmicutes; c__Clostridia; o__Clostridiales; f__Lachnospiraceae
feature51	k__Bacteria; p__Firmicutes; c__Clostridia; o__Clostridiales; f__Lachnospiraceae; g__; s__
feature52	k__Bacteria; p__Firmicutes; c__Clostridia; o__Clostridiales; f__Lachnospiraceae
feature53	k__Bacteria; p__Bacteroidetes; c__Bacteroidia; o__Bacteroidales; f__Rikenellaceae; g__Alistipes; s__putredinis
feature54	k__Bacteria; p__Firmicutes; c__Clostridia; o__Clostridiales; f__Lachnospiraceae; g__Blautia; s__
feature55	k__Bacteria; p__Firmicutes; c__Clostridia; o__Clostridiales; f__; g__; s__
feature56	k__Bacteria; p__Firmicutes; c__Clostridia; o__Clostridiales; f__Lachnospiraceae
feature57	k__Bacteria; p__Bacteroidetes; c__Bacteroidia; o__Bacteroidales; f__[Barnesiellaceae]; g__; s__
feature58	k__Bacteria; p__Firmicutes; c__Clostridia; o__Clostridiales; f__Lachnospiraceae; g__Coprococcus; s__
feature59	k__Bacteria; p__Firmicutes; c__Clostridia; o__Clostridiales; f__Ruminococcaceae; g__Butyricicoccus; s__pullicaecorum
feature60	k__Bacteria; p__Firmicutes; c__Clostridia; o__Clostridiales; f__Peptostreptococcaceae
feature61	k__Bacteria; p__Firmicutes; c__Clostridia; o__Clostridiales; f__Ruminococcaceae; g__Faecalibacterium; s__prausnitzii
feature62	k__Bacteria; p__Firmicutes; c__Clostridia; o__Clostridiales; f__Lachnospiraceae; g__Coprococcus; s__
feature63	k__Bacteria; p__Bacteroidetes; c__Bacteroidia; o__Bacteroidales; f__Bacteroidaceae; g__Bacteroides; s__eggerthii
feature64	k__Bacteria; p__Firmicutes; c__Clostridia; o__Clostridiales; f__Ruminococcaceae; g__Oscillospira; s__
feature65	k__Bacteria; p__Firmicutes; c__Clostridia; o__Clostridiales
feature66	k__Bacteria; p__Firmicutes; c__Clostridia; o__Clostridiales; f__Ruminococcaceae; g__Faecalibacterium; s__prausnitzii
feature67	k__Bacteria; p__Firmicutes; c__Clostridia; o__Clostridiales; f__Christensenellaceae; g__; s__
feature68	k__Bacteria; p__Actinobacteria; c__Coriobacteriia; o__Coriobacteriales; f__Coriobacteriaceae; g__Collinsella; s__aerofaciens
feature69	k__Bacteria; p__Firmicutes; c__Clostridia; o__Clostridiales; f__Ruminococcaceae; g__Oscillospira; s__
feature70	k__Bacteria; p__Firmicutes; c__Clostridia; o__Clostridiales; f__Lachnospiraceae
feature71	k__Bacteria; p__Firmicutes; c__Erysipelotrichi; o__Erysipelotrichales; f__Erysipelotrichaceae; g__; s__
feature72	k__Bacteria; p__Firmicutes; c__Clostridia; o__Clostridiales; f__Ruminococcaceae
feature73	k__Bacteria; p__Firmicutes; c__Clostridia; o__Clostridiales; f__Lachnospiraceae; g__Clostridium; s__symbiosum
feature74	k__Bacteria; p__Firmicutes; c__Clostridia; o__Clostridiales; f__Ruminococcaceae; g__; s__
feature75	k__Bacteria; p__Firmicutes; c__Clostridia; o__Clostridiales; f__Veillonellaceae; g__Phascolarctobacterium; s__
feature76	k__Bacteria; p__Firmicutes; c__Clostridia; o__Clostridiales; f__Ruminococcaceae; g__Ruminococcus; s__
feature77	k__Bacteria; p__Firmicutes; c__Clostridia; o__Clostridiales; f__Lachnospiraceae
feature78	k__Bacteria; p__Firmicutes; c__Clostridia; o__Clostridiales; f__Ruminococcaceae
feature79	k__Bacteria; p__Firmicutes; c__Clostridia; o__Clostridiales; f__Ruminococcaceae; g__Ruminococcus; s__
feature80	k__Bacteria; p__Actinobacteria; c__Coriobacteriia; o__Coriobacteriales; f__Coriobacteriaceae; g__Collinsella; s__aerofaciens
feature81	k__Bacteria; p__Firmicutes; c__Clostridia; o__Clostridiales; f__Lachnospiraceae; g__Lachnospira; s__
feature82	k__Bacteria; p__Firmicutes; c__Clostridia; o__Clostridiales; f__Ruminococcaceae; g__Oscillospira; s__
feature83	k__Bacteria; p__Firmicutes; c__Clostridia; o__Clostridiales; f__Lachnospiraceae; g__Coprococcus; s__
feature84	k__Bacteria; p__Firmicutes; c__Clostridia; o__Clostridiales; f__Lachnospiraceae; g__Dorea; s__
feature85	k__Bacteria; p__Firmicutes; c__Bacilli; o__Lactobacillales; f__Streptococcaceae; g__Streptococcus; s__
feature86	k__Bacteria; p__Firmicutes; c__Clostridia; o__Clostridiales; f__Lachnospiraceae
feature87	k__Bacteria; p__Firmicutes; c__Clostridia; o__Clostridiales; f__Lachnospiraceae; g__Roseburia
feature88	k__Bacteria; p__Firmicutes; c__Clostridia; o__Clostridiales; f__Ruminococcaceae
feature89	k__Bacteria; p__Verrucomicrobia; c__Verrucomicrobiae; o__Verrucomicrobiales; f__Verrucomicrobiaceae; g__Akkermansia; s__muciniphila
feature90	k__Bacteria; p__Bacteroidetes; c__Bacteroidia; o__Bacteroidales; f__Bacteroidaceae; g__Bacteroides; s__ovatus
feature91	k__Bacteria; p__Proteobacteria; c__Gammaproteobacteria; o__Pasteurellales; f__Pasteurellaceae; g__Haemophilus; s__parainfluenzae
feature92	k__Bacteria; p__Bacteroidetes; c__Bacteroidia; o__Bacteroidales; f__Bacteroidaceae; g__Bacteroides; s__
feature93	k__Bacteria; p__Bacteroidetes; c__Bacteroidia; o__Bacteroidales; f__Bacteroidaceae; g__Bacteroides; s__
feature94	k__Bacteria; p__Proteobacteria; c__Betaproteobacteria; o__Burkholderiales; f__Alcaligenaceae; g__Sutterella; s__
feature95	k__Bacteria; p__Firmicutes; c__Bacilli; o__Lactobacillales; f__Streptococcaceae; g__Streptococcus; s__
feature96	k__Bacteria; p__Firmicutes; c__Clostridia; o__Clostridiales; f__Clostridiaceae; g__; s__
feature97	k__Bacteria; p__Bacteroidetes; c__Bacteroidia; o__Bacteroidales; f__[Paraprevotellaceae]; g__Paraprevotella; s__
feature98	k__Bacteria; p__Bacteroidetes; c__Bacteroidia; o__Bacteroidales; f__Rikenellaceae
feature99	k__Bacteria; p__Firmicutes; c__Clostridia; o__Clostridiales; f__Lachnospiraceae
feature100	k__Bacteria; p__Bacteroidetes; c__Bacteroidia; o__Bacteroidales; f__Bacteroidaceae; g__Bacteroides; s__uniformis
feature101	k__Bacteria; p__Firmicutes; c__Clostridia; o__Clostridiales; f__Ruminococcaceae; g__; s__
feature102	k__Bacteria; p__Firmicutes; c__Clostridia; o__Clostridiales; f__Ruminococcaceae; g__Oscillospira; s__
feature103	k__Bacteria; p__Bacteroidetes; c__Bacteroidia; o__Bacteroidales; f__Prevotellaceae; g__Prevotella; s__
feature104	k__Bacteria; p__Firmicutes; c__Clostridia; o__Clostridiales; f__Ruminococcaceae; g__Faecalibacterium; s__prausnitzii
feature105	k__Bacteria; p__Firmicutes; c__Clostridia; o__Clostridiales; f__Ruminococcaceae
feature106	k__Bacteria; p__Bacteroidetes; c__Bacteroidia; o__Bacteroidales; f__Bacteroidaceae; g__Bacteroides; s__
feature107	k__Bacteria; p__Firmicutes; c__Clostridia; o__Clostridiales; f__[Mogibacteriaceae]; g__; s__
feature108	k__Bacteria; p__Firmicutes; c__Clostridia; o__Clostridiales; f__Lachnospiraceae; g__Coprococcus; s__
feature109	k__Bacteria; p__Actinobacteria; c__Actinobacteria; o__Bifidobacteriales; f__Bifidobacteriaceae; g__Bifidobacterium; s__adolescentis
feature110	k__Bacteria; p__Bacteroidetes; c__Bacteroidia; o__Bacteroidales; f__Bacteroidaceae; g__Bacteroides; s__
feature111	k__Bacteria; p__Bacteroidetes; c__Bacteroidia; o__Bacteroidales; f__Bacteroidaceae; g__Bacteroides; s__eggerthii
feature112	k__Bacteria; p__Proteobacteria; c__Deltaproteobacteria; o__Desulfovibrionales; f__Desulfovibrionaceae; g__Bilophila; s__
feature113	k__Bacteria; p__Firmicutes; c__Clostridia; o__Clostridiales; f__; g__; s__
feature114	k__Bacteria; p__Firmicutes; c__Clostridia; o__Clostridiales; f__Lachnospiraceae
feature115	k__Bacteria; p__Bacteroidetes; c__Bacteroidia; o__Bacteroidales; f__Porphyromonadaceae; g__Parabacteroides; s__
feature116	k__Bacteria; p__Cyanobacteria; c__4C0d-2; o__YS2; f__; g__; s__
feature117	k__Bacteria; p__Bacteroidetes; c__Bacteroidia; o__Bacteroidales; f__Rikenellaceae; g__; s__
feature118	k__Bacteria; p__Bacteroidetes; c__Bacteroidia; o__Bacteroidales; f__Prevotellaceae; g__Prevotella; s__
feature119	k__Bacteria; p__Firmicutes; c__Clostridia; o__Clostridiales; f__Lachnospiraceae; g__Blautia; s__
feature120	k__Bacteria; p__Firmicutes; c__Clostridia; o__Clostridiales; f__Ruminococcaceae
feature121	k__Bacteria; p__Firmicutes; c__Clostridia; o__Clostridiales; f__Lachnospiraceae; g__[Ruminococcus]; s__
feature122	k__Bacteria; p__Bacteroidetes; c__Bacteroidia; o__Bacteroidales; f__Bacteroidaceae; g__Bacteroides; s__
feature123	k__Bacteria; p__Proteobacteria; c__Betaproteobacteria; o__Burkholderiales; f__Alcaligenaceae; g__Sutterella; s__
feature124	k__Bacteria; p__Firmicutes; c__Clostridia; o__Clostridiales; f__Lachnospiraceae; g__Coprococcus; s__
feature125	k__Bacteria; p__Actinobacteria; c__Actinobacteria; o__Bifidobacteriales; f__Bifidobacteriaceae; g__Bifidobacterium; s__longum
feature126	k__Bacteria; p__Firmicutes; c__Clostridia; o__Clostridiales; f__Ruminococcaceae; g__Ruminococcus; s__
feature127	k__Bacteria; p__Firmicutes; c__Clostridia; o__Clostridiales; f__Ruminococcaceae; g__Oscillospira; s__
feature128	k__Bacteria; p__Firmicutes; c__Clostridia; o__Clostridiales; f__Ruminococcaceae; g__Oscillospira; s__
feature129	k__Bacteria; p__Firmicutes; c__Clostridia; o__Clostridiales; f__Lachnospiraceae
feature130	k__Bacteria; p__Bacteroidetes; c__Bacteroidia; o__Bacteroidales; f__Bacteroidaceae; g__Bacteroides; s__
feature131	k__Bacteria; p__Bacteroidetes; c__Bacteroidia; o__Bacteroidales; f__Prevotellaceae; g__Prevotella; s__copri
feature132	k__Bacteria; p__Bacteroidetes; c__Bacteroidia; o__Bacteroidales; f__Porphyromonadaceae; g__Parabacteroides; s__distasonis
feature133	k__Bacteria; p__Firmicutes; c__Clostridia; o__Clostridiales; f__Ruminococcaceae; g__Oscillospira; s__
feature134	k__Bacteria; p__Bacteroidetes; c__Bacteroidia; o__Bacteroidales; f__[Odoribacteraceae]; g__Butyricimonas; s__
feature135	k__Bacteria; p__Firmicutes; c__Clostridia; o__Clostridiales; f__Lachnospiraceae; g__Dorea; s__longicatena
feature136	k__Bacteria; p__Firmicutes; c__Clostridia; o__Clostridiales; f__Ruminococcaceae; g__Ruminococcus; s__
feature137	k__Bacteria; p__Firmicutes; c__Erysipelotrichi; o__Erysipelotrichales; f__Erysipelotrichaceae; g__Catenibacterium; s__
feature138	k__Bacteria; p__Firmicutes; c__Clostridia; o__Clostridiales; f__Lachnospiraceae
feature139	k__Bacteria; p__Firmicutes; c__Clostridia; o__Clostridiales; f__Lachnospiraceae; g__[Ruminococcus]; s__gnavus
feature140	k__Bacteria; p__Firmicutes; c__Clostridia; o__Clostridiales; f__Lachnospiraceae
feature141	k__Bacteria; p__Firmicutes; c__Clostridia; o__Clostridiales; f__Lachnospiraceae
feature142	k__Bacteria; p__Firmicutes; c__Clostridia; o__Clostridiales; f__Veillonellaceae; g__Veillonella; s__parvula
feature143	k__Bacteria; p__Actinobacteria; c__Actinobacteria; o__Bifidobacteriales; f__Bifidobacteriaceae; g__Bifidobacterium; s__longum
feature144	k__Bacteria; p__Firmicutes; c__Clostridia; o__Clostridiales; f__Lachnospiraceae
feature145	k__Bacteria; p__Firmicutes; c__Clostridia; o__Clostridiales; f__Ruminococcaceae; g__Ruminococcus; s__
feature146	k__Bacteria; p__Firmicutes; c__Clostridia; o__Clostridiales; f__Lachnospiraceae; g__Coprococcus; s__
feature147	k__Bacteria; p__Firmicutes; c__Clostridia; o__Clostridiales; f__Lachnospiraceae; g__Coprococcus; s__catus
feature148	k__Bacteria; p__Bacteroidetes; c__Bacteroidia; o__Bacteroidales; f__Bacteroidaceae; g__Bacteroides; s__caccae
feature149	k__Bacteria; p__Firmicutes; c__Clostridia; o__Clostridiales; f__Ruminococcaceae; g__Ruminococcus; s__
feature150	k__Bacteria; p__Bacteroidetes; c__Bacteroidia; o__Bacteroidales; f__Bacteroidaceae; g__Bacteroides; s__caccae
feature151	k__Bacteria; p__Bacteroidetes; c__Bacteroidia; o__Bacteroidales; f__Bacteroidaceae; g__Bacteroides; s__ovatus
feature152	k__Bacteria; p__Bacteroidetes; c__Bacteroidia; o__Bacteroidales; f__[Barnesiellaceae]
feature153	k__Bacteria; p__Proteobacteria; c__Betaproteobacteria; o__Burkholderiales; f__Alcaligenaceae; g__Sutterella; s__
feature154	k__Bacteria; p__Firmicutes; c__Clostridia; o__Clostridiales; f__Lachnospiraceae; g__; s__
feature155	k__Bacteria; p__Firmicutes; c__Clostridia; o__Clostridiales; f__Lachnospiraceae; g__Coprococcus; s__
feature156	k__Bacteria; p__Bacteroidetes; c__Bacteroidia; o__Bacteroidales; f__[Odoribacteraceae]; g__Butyricimonas; s__
feature157	k__Bacteria; p__Firmicutes; c__Clostridia; o__Clostridiales; f__Peptostreptococcaceae
feature158	k__Bacteria; p__Bacteroidetes; c__Bacteroidia; o__Bacteroidales; f__Prevotellaceae; g__Prevotella; s__
feature159	k__Bacteria; p__Firmicutes; c__Clostridia; o__Clostridiales; f__Ruminococcaceae
feature160	k__Bacteria; p__Bacteroidetes; c__Bacteroidia; o__Bacteroidales; f__Bacteroidaceae; g__Bacteroides; s__plebeius
feature161	k__Bacteria; p__Firmicutes; c__Clostridia; o__Clostridiales; f__Lachnospiraceae; g__Blautia
feature162	k__Bacteria; p__Firmicutes; c__Clostridia; o__Clostridiales; f__Lachnospiraceae; g__Coprococcus; s__eutactus
feature163	k__Bacteria; p__Firmicutes; c__Clostridia; o__Clostridiales; f__Lachnospiraceae
feature164	k__Bacteria; p__Bacteroidetes; c__Bacteroidia; o__Bacteroidales; f__[Odoribacteraceae]; g__Odoribacter; s__
feature165	k__Bacteria; p__Firmicutes; c__Clostridia; o__Clostridiales; f__Ruminococcaceae; g__Ruminococcus; s__
feature166	k__Bacteria; p__Proteobacteria; c__Deltaproteobacteria; o__Desulfovibrionales; f__Desulfovibrionaceae; g__; s__
feature167	k__Bacteria; p__Bacteroidetes; c__Bacteroidia; o__Bacteroidales; f__Bacteroidaceae; g__Bacteroides; s__
feature168	k__Bacteria; p__Actinobacteria; c__Actinobacteria; o__Bifidobacteriales; f__Bifidobacteriaceae; g__Bifidobacterium; s__bifidum
feature169	k__Bacteria; p__Firmicutes; c__Clostridia; o__Clostridiales; f__Lachnospiraceae; g__; s__
feature170	k__Bacteria; p__Bacteroidetes; c__Bacteroidia; o__Bacteroidales; f__Bacteroidaceae; g__Bacteroides; s__
feature171	k__Bacteria; p__Bacteroidetes; c__Bacteroidia; o__Bacteroidales; f__Bacteroidaceae; g__Bacteroides; s__caccae
feature172	k__Bacteria; p__Firmicutes; c__Clostridia; o__Clostridiales; f__Ruminococcaceae; g__Anaerotruncus; s__
feature173	k__Bacteria; p__Firmicutes; c__Clostridia; o__Clostridiales; f__Ruminococcaceae
feature174	k__Bacteria; p__Firmicutes; c__Clostridia; o__Clostridiales; f__Veillonellaceae; g__Veillonella; s__dispar
feature175	k__Bacteria; p__Bacteroidetes; c__Bacteroidia; o__Bacteroidales; f__Rikenellaceae; g__Alistipes; s__massiliensis
feature176	k__Bacteria; p__Firmicutes; c__Clostridia; o__Clostridiales; f__Ruminococcaceae; g__; s__
feature177	k__Bacteria; p__Bacteroidetes; c__Bacteroidia; o__Bacteroidales; f__Bacteroidaceae; g__Bacteroides
feature178	k__Bacteria; p__Tenericutes; c__Mollicutes; o__RF39; f__; g__; s__
feature179	k__Bacteria; p__Firmicutes; c__Clostridia; o__Clostridiales; f__Ruminococcaceae
feature180	k__Bacteria; p__Bacteroidetes; c__Bacteroidia; o__Bacteroidales; f__Bacteroidaceae; g__Bacteroides; s__
feature181	k__Bacteria; p__Firmicutes; c__Bacilli; o__Lactobacillales; f__Streptococcaceae; g__Streptococcus; s__luteciae
feature182	k__Bacteria; p__Proteobacteria; c__Gammaproteobacteria; o__Enterobacteriales; f__Enterobacteriaceae; g__Hafnia; s__alvei
feature183	k__Bacteria; p__Actinobacteria; c__Actinobacteria; o__Bifidobacteriales; f__Bifidobacteriaceae; g__Bifidobacterium; s__longum
feature184	k__Bacteria; p__Bacteroidetes; c__Bacteroidia; o__Bacteroidales; f__Rikenellaceae; g__; s__
feature185	k__Bacteria; p__Firmicutes; c__Clostridia; o__Clostridiales; f__Lachnospiraceae
feature186	k__Bacteria; p__Bacteroidetes; c__Bacteroidia; o__Bacteroidales; f__Rikenellaceae; g__; s__
feature187	k__Bacteria; p__Firmicutes; c__Clostridia; o__Clostridiales; f__Ruminococcaceae
feature188	k__Bacteria; p__Firmicutes; c__Clostridia; o__Clostridiales; f__Ruminococcaceae; g__Oscillospira; s__
feature189	k__Bacteria; p__Proteobacteria; c__Deltaproteobacteria; o__Desulfovibrionales; f__Desulfovibrionaceae; g__Bilophila; s__
feature190	k__Bacteria; p__Bacteroidetes; c__Bacteroidia; o__Bacteroidales; f__Rikenellaceae; g__; s__
feature191	k__Bacteria; p__Firmicutes; c__Clostridia; o__Clostridiales; f__Ruminococcaceae; g__Ruminococcus; s__bromii
feature192	k__Bacteria; p__Firmicutes; c__Clostridia; o__Clostridiales; f__Lachnospiraceae
feature193	k__Bacteria; p__Bacteroidetes; c__Bacteroidia; o__Bacteroidales; f__Porphyromonadaceae; g__Parabacteroides; s__
feature194	k__Bacteria; p__Firmicutes; c__Clostridia; o__Clostridiales; f__Ruminococcaceae; g__Oscillospira; s__
feature195	k__Bacteria; p__Firmicutes; c__Bacilli; o__Lactobacillales; f__Enterococcaceae; g__Enterococcus; s__
feature196	k__Bacteria; p__Firmicutes; c__Clostridia; o__Clostridiales; f__Lachnospiraceae; g__Coprococcus; s__
feature197	k__Bacteria; p__Firmicutes; c__Clostridia; o__Clostridiales; f__Ruminococcaceae; g__Faecalibacterium; s__prausnitzii
feature198	k__Bacteria; p__Bacteroidetes; c__Bacteroidia; o__Bacteroidales; f__[Barnesiellaceae]
feature199	k__Bacteria; p__Firmicutes; c__Clostridia; o__Clostridiales; f__Ruminococcaceae; g__; s__
feature200	k__Bacteria; p__Firmicutes; c__Clostridia; o__Clostridiales; f__; g__; s__
feature201	k__Bacteria; p__Bacteroidetes; c__Bacteroidia; o__Bacteroidales; f__Porphyromonadaceae; g__Parabacteroides; s__distasonis
feature202	k__Bacteria; p__Firmicutes; c__Clostridia; o__Clostridiales; f__Lachnospiraceae; g__Lachnospira; s__
feature203	k__Bacteria; p__Bacteroidetes; c__Bacteroidia; o__Bacteroidales; f__Rikenellaceae; g__Alistipes; s__finegoldii
feature204	k__Bacteria; p__Bacteroidetes; c__Bacteroidia; o__Bacteroidales; f__Rikenellaceae; g__Alistipes; s__onderdonkii
feature205	k__Bacteria; p__Firmicutes; c__Clostridia; o__Clostridiales; f__Ruminococcaceae; g__Oscillospira; s__
feature206	k__Bacteria; p__Proteobacteria; c__Gammaproteobacteria; o__Enterobacteriales; f__Enterobacteriaceae; g__Serratia; s__
feature207	k__Bacteria; p__Firmicutes; c__Clostridia; o__Clostridiales; f__Ruminococcaceae; g__; s__
feature208	k__Bacteria; p__Firmicutes; c__Clostridia; o__Clostridiales; f__Ruminococcaceae
feature209	k__Bacteria; p__Firmicutes; c__Clostridia; o__Clostridiales; f__Lachnospiraceae; g__; s__
feature210	k__Bacteria; p__Firmicutes; c__Clostridia; o__Clostridiales; f__Clostridiaceae; g__Clostridium; s__
feature211	k__Bacteria; p__Firmicutes; c__Bacilli; o__Lactobacillales; f__Streptococcaceae; g__Streptococcus; s__
feature212	k__Bacteria; p__Firmicutes; c__Clostridia; o__Clostridiales; f__Lachnospiraceae; g__Lachnospira; s__
feature213	k__Bacteria; p__Firmicutes; c__Clostridia; o__Clostridiales; f__Ruminococcaceae; g__Butyricicoccus; s__pullicaecorum
feature214	k__Bacteria; p__Bacteroidetes; c__Bacteroidia; o__Bacteroidales; f__Bacteroidaceae; g__Bacteroides; s__
feature215	k__Bacteria; p__Firmicutes; c__Clostridia; o__Clostridiales; f__Ruminococcaceae; g__Ruminococcus; s__
feature216	k__Bacteria; p__Firmicutes; c__Clostridia; o__Clostridiales
feature217	k__Bacteria; p__Firmicutes; c__Clostridia; o__Clostridiales; f__Clostridiaceae; g__; s__
feature218	k__Bacteria; p__Firmicutes; c__Bacilli; o__Lactobacillales; f__Enterococcaceae; g__Enterococcus; s__
feature219	k__Bacteria; p__Firmicutes; c__Clostridia; o__Clostridiales; f__Lachnospiraceae
feature220	k__Bacteria; p__Proteobacteria; c__Betaproteobacteria; o__Burkholderiales; f__Alcaligenaceae; g__Sutterella; s__
feature221	k__Bacteria; p__Bacteroidetes; c__Bacteroidia; o__Bacteroidales; f__Bacteroidaceae; g__Bacteroides; s__ovatus
feature222	k__Bacteria; p__Bacteroidetes; c__Bacteroidia; o__Bacteroidales; f__[Odoribacteraceae]; g__Butyricimonas; s__
feature223	k__Bacteria; p__Bacteroidetes; c__Bacteroidia; o__Bacteroidales; f__Rikenellaceae; g__; s__
feature224	k__Bacteria; p__Firmicutes; c__Clostridia; o__Clostridiales
feature225	k__Bacteria; p__Proteobacteria; c__Gammaproteobacteria; o__Pasteurellales; f__Pasteurellaceae; g__Haemophilus; s__parainfluenzae
feature226	k__Bacteria; p__Firmicutes; c__Clostridia; o__Clostridiales; f__Lachnospiraceae; g__Coprococcus; s__
feature227	k__Bacteria; p__Bacteroidetes; c__Bacteroidia; o__Bacteroidales; f__Prevotellaceae; g__Prevotella; s__copri
feature228	k__Bacteria; p__Bacteroidetes; c__Bacteroidia; o__Bacteroidales; f__Porphyromonadaceae; g__Parabacteroides; s__distasonis
[truncated: 869 more rows]

## Sheet: diff_abun_results
Group	Custom ID	QIIME taxonomic classification	Results intepretation	Methods
[truncated: 37 more rows]
