# Supplementary material for: Adherence to Gluten-Free Diet Restores Alpha Diversity in Celiac People but the Microbiome Composition Is Different to Healthy People
Source: Nutrients. 2022 Jun 14;14(12):2452. doi: 10.3390/nu14122452 (PMC9228530; doi:10.3390/nu14122452)
Supplement: Supplementary file 1 [file nutrients-14-02452-s001.zip › Supplementary_Table S2.xlsx]

## Sheet: Guide
Sample_table	Sample association table. Column A: sample identifiers; column B: sample group; column C: sample group as defined in ALDEX2 analysis.
Path_Abun_Picrust2	Predicted pathway counts across samples. Pathway prediction and quantification by Picrust2 2.3.0_b; column A: pathway names/Ids by MetaCyc database.
Diff_Analysis_ALDEX	Differential analysis for pathway counts between Class 0 ("Healthy Control", "HC") and Class 1 ("Celiac Disease", "CD") sample groups. Columns B - L: ALDEx2 output.
	Column G: ALDEx2 "effect", with negative values for pathways with a lower abundance in CD samples with respect to the HC pool.
	Only two pathways result to be mildly under-represented in Class 1 ("Basal Samples"), as shown in column "M": character "." is used for pathways with no significant differerential abundance.

## Sheet: Sample_table
Table S2. Pathway prediction and associated differential abundance measurement by Picrust2 and ALDEx2 tools
SampleID	Class
GF001	CD
GF006	CD
GF007	CD
GF008	CD
GF009	CD
GF014	CD
GF015	CD
GF023	CD
GF003	CD
GF005	CD
GF011	CD
GF013	CD
GF018	CD
GF019	CD
GF025	CD
GF028	CD
GF029	CD
GF031	CD
GF033	CD
GF017	CD
GF024	CD
GF026	CD
GF040	CD
GF041	CD
GF043	CD
GF054	CD
GF060	CD
GF061	CD
GF063	CD
GF100	CD
GF105	CD
GF106	CD
GF108	CD
GF111	CD
GF002	CD
GF010	CD
GF016	CD
GF020	CD
GF027	CD
GF032	CD
GF037	CD
GF044	CD
GF048	CD
GF053	CD
GF062	CD
GF104	CD
GF42	CD
10C	HC
11C	HC
12C	HC
1C	HC
2C	HC
4C	HC
5C	HC
6C	HC
7C	HC
8C	HC
CON652SGR-06-09-2021	HC
CON653SGR-20-10-2021	HC
CON658SGR-06-09-2021	HC
CON659SGR-06-09-2021	HC
CON660SGR-08-09-2021	HC
CON661SGR-06-10-2021	HC
CON662SGR-06-10-2021	HC
CON663SGR-06-10-2021	HC
CON664SGR-07-10-2021	HC
CON665SGR-08-10-2021	HC
CON666SGR-13-10-2021	HC
CON667SGR-14-10-2021	HC
CON668SGR-30-12-2021	HC
CON669SGR-30-12-2021	HC
CON670SGR-30-12-2021	HC
CON671SGR-30-12-2021	HC
D01SGR-18-03-2021	HC
D02SGR-22-04-2021	HC
D03SGR-22-04-2021	HC
D04SGR-23-06-2021	HC

## Sheet: Path_Abun_Picrust2
pathway	10C	11C	12C	1C	2C	4C	5C	6C	7C	8C	CON652SGR-06-09-2021	CON653SGR-20-10-2021	CON658SGR-06-09-2021	CON659SGR-06-09-2021	CON660SGR-08-09-2021	CON661SGR-06-10-2021	CON662SGR-06-10-2021	CON663SGR-06-10-2021	CON664SGR-07-10-2021	CON665SGR-08-10-2021	CON666SGR-13-10-2021	CON667SGR-14-10-2021	CON668SGR-30-12-2021	CON669SGR-30-12-2021	CON670SGR-30-12-2021	CON671SGR-30-12-2021	D01SGR-18-03-2021	D02SGR-22-04-2021	D03SGR-22-04-2021	D04SGR-23-06-2021	GF001	GF002	GF003	GF005	GF006	GF007	GF008	GF009	GF011	GF013	GF014	GF015	GF016	GF017	GF018	GF019	GF020	GF023	GF024
1CMET2-PWY	3869.84	13818.1	5124.71	7055.59	17285.6	13265.7	8527.76	11671.1	10640.7	18298.8	4813.24	13918.2	7990.55	8332.52	10303.9	13416.3	8758.58	10498.2	10369.7	10115.3	7887.17	8108.07	14958.7	22087.1	17481.9	18252.4	13503.9	9798.82	8994.64	7048.3	18984.6	8180.47	7517.97	7674.16	55056.7	19301.1	22458.8	18359.1	10937.1	11412.5	10929.7	15107.3	15599.7	10304.1	15117	8228.23	7403.45	35924.2	12882.5
3-HYDROXYPHENYLACETATE-DEGRADATION-PWY	0	0	130.852	0	35.5113	0	23.6008	0	0	51.7128	0	0	0	84.5443	0	0	0	55.6215	0	0	0	0	0	0	15.2837	0	0	0	0	0	33.1967	19.8637	87.134	0	0	0	0	57.5542	0	0	884.352	115.899	0	0	0	0	8.19694	156.361	0
ALL-CHORISMATE-PWY	232.458	350.464	2310.97	3322.43	2205.29	438.426	2456.57	0	409.095	1146.78	578.051	51.2121	0	710.568	0	403.971	319.4	1270.55	222.678	546.691	550.474	515.654	0	595.416	905.541	0	0	489.965	279.362	0	585.806	490.345	864.334	375.384	0	412.767	5772.27	1597.7	0	0	6624.31	2155.42	374.478	0	400.619	75.0298	464.049	1504.05	189.03
ANAEROFRUCAT-PWY	3900.91	12778.8	5336.5	6854.6	19547	11730.9	7695.16	11513.8	10573.8	16101.4	4319.63	13272.5	5638.56	6737.03	8322.17	12340.1	7723.19	6713.76	10164.6	10008.1	8458.57	5344.63	13867.6	21256	17006.5	17081	11590.9	9896.02	7835.89	6191.82	18291.7	7928.29	7584.32	7453.2	54665.7	14992.2	20050.8	18602.3	9554.42	11767.6	12353.6	15714.9	15024	10205.6	13315	8619.38	7313.41	34498.1	11790.3
ANAGLYCOLYSIS-PWY	4961.43	16424.5	6561.92	8696.89	23271.3	17118.2	11122.5	15279.5	13173.7	23492.8	6316.66	18189.2	10175.5	10576.9	12688.3	16823.9	11060.4	13432.7	13092.5	13147.7	10057.2	10118.4	18702.4	27977.2	21528.9	23944.2	17079	12570.6	12221.4	9144.6	24179.7	10718.9	9777.33	10128.4	71571.1	24442.1	28024	23401.1	13691	14916.7	14365.4	19185.7	19446.6	13184.7	18540.2	11130.4	9528.48	45361.4	15093.7
ARG+POLYAMINE-SYN	773.088	2154.96	2826.93	3952.96	3669.42	1213.06	4177.8	2989.66	1876.86	5214.15	593.628	2906.57	795.693	2635.3	2590.41	1220.49	923.308	2825.6	1835.21	1999.01	2565.84	2721.1	3938.88	2809.99	3889.67	3900.26	2962.59	2061.41	1691.53	573.698	3102.16	1900.23	2030.25	1978.09	8161.81	6711.6	7277.31	2346.32	2663.95	1816.13	7766.57	3472.2	2006.19	1323.4	4396.77	1676.43	1942.62	5015.01	1758.81
ARGDEG-PWY	62.9426	29.9195	1744.01	2154.09	681.387	72.6998	1456.99	0	58.6542	390.551	107.043	3.05693	0	272.376	0	53.8279	73.141	601.375	47.2719	109.889	229.789	93.4594	0	114.348	154.192	0	0	188.937	92.7842	0	185.139	70.1498	301.579	99.2236	0	59.5336	2587.66	472.9	0	0	4970.35	797.569	73.2457	0	99.694	22.4003	87.9625	318.956	60.347
ARGORNPROST-PWY	574.9	1170.59	180.979	86.2535	1820.08	1719.71	710.521	574.574	558.706	2361.87	547.892	1206.95	854.917	862.035	957.22	1638.31	1056.11	570.865	1025.37	804.466	930.416	1306.81	1523.06	1008.97	637.776	1271.71	1031.11	502.692	1010.66	1050.75	1849.32	1090.4	830.185	828.741	4464.51	1881.7	2345.36	2771.33	1148.05	938.773	605.9	1640.17	1686.76	1171.03	1110.42	1038.17	888.573	4367.61	990.558
ARGSYN-PWY	3623.1	11160.8	4596.11	5804.59	15685.4	12015.6	7911.94	9520.85	8345.08	18008.4	5055.98	13791.9	6719.56	8212.77	9169.34	11589.3	7946.47	10608	8456.93	9438.25	10015.4	8169.99	12612.6	16563.2	15069.3	15668	13446.8	8434.44	8515.11	6570.99	14309.8	7164.3	7005.24	7157.76	42803.8	18562.4	16608.8	14993.4	9142.77	10248.4	9987.92	13784.5	10640.4	8520	13572.8	7701.04	7075.97	26005.9	10483.5
ARGSYNBSUB-PWY	3550.64	10875.7	4728.32	5781	15523.8	11844.2	7987.88	8937.18	7893.12	17838.1	5077.88	13671.6	6433.55	8303.14	8787.42	11057.6	7810.93	10643.2	8184.66	9191.75	10331.6	8264.31	11589.2	15312.2	14574.6	15071	13362.3	8262.66	8332.95	6480.63	13519	6851.58	6781.23	6924.58	39644.6	18290.7	15073.3	14463.2	8865.04	9880.69	10033.3	13556.2	9764.99	8075.73	12978.3	7577.31	6899.12	23933.7	9959.36
ARO-PWY	4464.86	14467.5	6058.68	7599.2	18803.4	15237.7	10144.8	13432.7	11401.6	21347.3	5937.13	16530.2	9017.61	10045.3	11606.7	14491.5	9880.16	12815.8	11304.6	11783.7	10174.8	9514.29	16303.4	23306	17629.4	21176.2	16039.4	11366.8	10638.9	8246.42	19538.1	9215.2	8595.5	8959.54	59895.2	22307.3	23357.4	20412.6	12089.6	13073.1	12576.2	16964.1	15994.8	11077.5	17103.2	9182.21	8591.18	37645.4	12905.4
ASPASN-PWY	4064.04	13207.5	4039.27	7058.24	15146.6	13959.4	8241.53	11579.5	9831.52	17348.7	4586.49	13346.8	7940.87	8053.48	10016.3	12585.5	8925.22	10140.7	10127	10834.4	11438.5	5371.29	15066.9	24211.6	19582	19294.6	12740.6	10220.2	10164.6	7126.9	22850.7	8862.9	7590.41	7592.44	61732.4	19121.7	24575.1	17588.7	10899.6	12613.2	11152.1	15021.8	17096.7	11447.5	15012.8	8115.77	7574.27	42808.6	13016.2
AST-PWY	34	13.33	1315.66	1656	388.67	39.01	1041	0	28	183.67	58.67	1.33	0	98.01	0	24.67	37.33	331.34	22.33	67.68	145.66	46.99	0	64	77.01	0	0	99.67	56	0	82.16	39.33	175.83	59	0	27.67	1769.67	220.33	0	0	3778.34	478.67	38	0	51.67	10.67	53.66	66.17	29.65
BIOTIN-BIOSYNTHESIS-PWY	1808.91	10118.4	2890	6288.3	8085.08	7906.92	3282.82	5380.3	7682.17	7467.95	1869.98	4538.66	2648.6	2766.91	6757.74	7799.46	4037.67	3740.12	5863.39	6996.55	3422.79	3174.92	10655.1	12182.5	12972.6	11776.8	4900.24	4585.85	5441.2	3442.38	17066.7	5720.59	4363.45	3656.52	21450.9	8870.29	19081.7	11877.3	6189.31	7185.3	8137.43	7220.42	12985.3	6116.19	11075	5384.03	4406.5	36932.7	9432.57
BRANCHED-CHAIN-AA-SYN-PWY	4769.45	15998.6	5745.68	7899.95	22257.1	16356.3	10810.7	14716.7	12483.7	22552.6	6424.93	17372.5	9865.21	10446.5	12322.1	16220.3	10661.3	13295.3	12252.5	12575.2	10683.9	11151.2	18064.5	26462.3	20089.3	23047	16770.3	12075.6	11492.4	8621.75	21378.1	10132.9	9423.22	9712.66	66196.2	24075.4	25974.1	22058.8	13239.5	13991	13265.7	18803.2	17758.2	12269.5	18412	10428.6	9164.36	40784.5	14262.9
CALVIN-PWY	4853.11	15843.3	6516	9038.42	21900.3	16370.6	11991.2	14657.7	12923.3	22862	5842.78	17441.9	9910.61	10715.5	12215.2	16521	10754.2	13161.6	13274	12860.3	10865.9	10206.1	18570.4	26842.7	20973.6	23690.7	16125.6	12309.1	11544.6	9004.77	22784.8	10174.8	9282.26	9538.38	69481.5	22919.5	27664.3	22670.4	13674	14834.6	15765	18953	18890.3	12422.9	18273.7	10737.9	9165.09	43967.6	15092.3
CENTFERM-PWY	328.067	2229.93	850.466	2308.3	3858.48	716.349	2188.09	427.364	767.897	2361.85	663.713	1020.72	103.049	1115.23	118.78	1771.45	580.657	1877.9	1145.94	611.904	848.602	2387.29	1571.25	943.371	1642.67	1372.57	171.303	669.715	754.971	837.719	1700.75	469.507	1211.54	446.157	1695.92	3127.46	6687.17	2130.76	1507.19	659.49	3393.83	3058.65	617.134	170.658	982.836	926.919	764.687	1794.3	393.067
COA-PWY	3902.96	13243.7	4866.9	6571.67	15341.1	13395.6	8669.74	12479.5	10557.8	18389.9	5349.52	14482.4	8287.28	8700.1	10155.7	12970.6	8617.96	11093.7	10115.3	10250.9	8733.35	8165.38	14865.3	22380.3	16834.6	19350.8	13849	10085.2	9377.46	6984.92	18049.7	8228.75	7781.92	7851.35	57590.2	20001.9	21660.1	18111.8	11164	11668.2	10583.5	14888.4	15160.1	10344.5	15355.8	8148.41	7442.13	34211.9	11978.5
COBALSYN-PWY	3036.44	11481.5	3754.23	6222.63	14091.1	12788.2	8799	8303.02	9505.99	15109.6	4641.09	11771.2	7708.9	7584.28	9584.01	10911.9	7751.91	10480.9	9276.56	9592.33	5996.24	6841.32	12460.7	14951.3	13647.9	19367.3	11699.8	7763.62	8329.48	6360.42	16364.1	7091.34	6239	7128.11	38920.7	16644.8	17156.1	15099.5	9681.33	10330.1	9534.5	11215.9	14320.2	8768.07	13382.1	6662.63	5931.69	29323.9	10687.1
CODH-PWY	209.695	459.566	0	0	0	161.016	7.99572	245.402	219.501	809.859	30.9054	952.293	110.037	321.658	478.316	0	314.678	286.082	283.745	642.424	3009.6	0	1123.15	638.433	1825.83	1465.34	728.296	217.591	227.193	27.9413	1290.46	211.079	290.554	436.557	1399.82	338.862	786.901	440.88	461.193	485.827	291.675	73.8034	224.248	252.758	537.703	523.212	476.047	26.989	669.524
COLANSYN-PWY	1593.29	8277.2	2291.51	3938.39	9647.98	7110.11	2439.83	7827.81	6786.97	8314.44	2645.68	6882.69	4168.82	3457.51	4641.69	6121.99	3817.01	4315.27	5505.22	5229.62	4310.28	5338.91	6788.98	9367.3	8576.21	10370.2	6152.89	5390.29	5375.75	3225.16	9734.26	4916.28	4509.51	4667.13	34070.6	9521.51	14563.8	10751.9	5647.16	5202.64	6001.93	8651.76	8321.79	5007.11	8416.63	5182.32	4471.1	20275.2	5092.39
COMPLETE-ARO-PWY	4620.74	15055.3	6342.2	7974.2	19540.7	15864.4	10584.1	13945.6	11869.7	22222.7	6195.06	17143	9360.08	10468.8	12130.3	15041.7	10265.5	13385.9	11758.6	12250.4	10472.5	9945.63	17010.1	24541.6	18446	22049.4	16694.4	11797.3	11118.7	8547.23	20476.4	9569.23	8946.82	9311.69	62586	23191.6	24463.6	21023.2	12626	13742.5	13151.4	17536.9	16668.8	11566.2	17942.1	9554.39	8918.49	39419.1	13494.7
DAPLYSINESYN-PWY	3792.92	11852.8	5393.54	6456.67	16513.1	13229.5	9222.19	10039.7	9048.29	18087.7	5208.92	14084.7	6911.72	8951.03	9439.21	12316.4	8329.96	11155.8	9315.93	10225.4	9450.64	8911.3	13018.5	17449.8	13786.6	17250.2	14129.9	9186.1	9172.89	7318.94	15063	7608.72	7305.22	7665.8	43635.7	19250.3	16568.1	15867.8	9962.4	11072.1	11214.6	14655.7	11594.5	8800.05	13494.6	7969.27	7177.87	27328.3	10626.2
DENOVOPURINE2-PWY	2782.41	12121.9	4056.74	6557.15	9664.51	10246.1	5848.81	10002.9	9286.3	11537.7	3359.16	10071.5	7053.71	5936.04	8465.68	11353.1	6153.39	6597.25	7345.55	8285.36	7723.09	7596.43	12052.1	21499.7	15277	14890.2	7378.17	8408.41	7453.59	4254.47	17715.6	6165.79	5974.1	5870.18	47660.4	14917.5	21545.5	14442.5	8943.43	9655.36	10820.1	11838.3	13893.3	6794.67	13420.5	6419.42	6188.21	35055.3	10401.2
DTDPRHAMSYN-PWY	4644.22	13962.9	5531.83	9081.69	23481.5	13792.8	8837.3	13129.1	11568.6	18682	4685.71	16414.8	8161.35	8479.56	11058.4	15870.8	8868.52	11491.7	10565.7	12162	9678.47	8917.55	16711.2	26441.4	21955.5	21625.9	14009.1	10740.3	10365.5	7099.64	24283.6	8798.86	8318.62	8983.34	64403.4	20050.6	27484.2	19816.4	11543.1	14513.6	12007.4	18018	20735.2	10922.8	15810.9	10624.5	7535.78	42568.5	13434.1
ECASYN-PWY	70.3513	31.2172	1762.62	2145.85	746.923	83.5567	1567.38	0	65.754	471.172	114.617	2.8478	0	277.201	0	54.9998	82.21	614.081	50.006	141.408	280.557	96.0947	0	133.153	178.338	0	0	197.253	123.905	0	211.697	91.1613	326.902	132.398	0	67.4572	2940.96	510.963	0	0	4912.69	875.846	90.1816	0	102.347	22.6904	120.371	322.245	70.504
ENTBACSYN-PWY	156.885	70.0485	2236.69	2500.21	1536.72	199.443	2634.37	0	145.254	843.553	272.007	7.08357	0	457.058	0	127.938	185.141	1291.43	115.147	337.16	672.982	236.655	0	325.841	379.323	0	0	474.366	274.024	0	404.426	194.368	709.361	285.455	0	145.008	3839.55	955.874	0	0	6320.03	1752.81	226.61	0	263.125	55.9327	260.681	401.924	151.996
FAO-PWY	154.629	1061.9	3122.22	3980.22	1984.64	405.445	2915.14	251.739	407.483	1367.56	383.119	504.369	59.7868	662.262	46.3097	1006.07	246.929	1213.88	724.19	274.376	447.232	3103.05	917.334	425.562	735.441	629.209	93.0537	324.286	381.95	473.106	965.833	255.931	686.068	189.838	845.051	1543.71	5259.02	1172.19	658.628	354.263	8926.46	1921.45	293.647	84.4209	531.643	567.23	440.09	932.442	197.055
FASYN-ELONG-PWY	3535.59	15827.9	3728.61	7960.12	14316	10693.6	5352.25	11763	11541.7	13768.2	3272.74	12560.5	7756.58	5538.65	8856.82	12382.9	7378.21	6660.08	8377.33	10472	9672.04	9951.9	15891.3	23678.6	18679.8	17618.4	9174.43	7838.98	7267.02	5092.85	27223.1	7754.09	6443.64	7137.28	59280	17565.7	25494.8	17910.5	11277.9	10217.4	10593.4	12279	18879.6	10453.8	14144.4	7830.41	6936.01	54211.2	13203
FASYN-INITIAL-PWY	1486.17	12056.1	2706.88	6429.15	10559.1	7754.29	2895.2	3321.77	8904.21	6642.95	2121.73	3133.99	1339.46	2211.47	6389.55	9031.03	3281.38	3177.26	6229.61	7974.07	3328.44	2401.81	11645.3	7035.31	14356.6	12877.1	5479.78	3127.45	5394.89	3427.21	22171.5	5903.32	4421.4	3384.68	11112	6542.67	17929.1	12274.1	5389.7	6206.04	7171.78	5355.35	15198.7	4365.94	10750.3	5411.86	4470.02	40894.4	10005.9
FERMENTATION-PWY	3060.88	10004.2	3889.63	6838.16	16558.9	10199.5	5936.42	9970.95	8998.78	13411.3	3275.43	10528.6	4435.92	5664.67	8033.36	10145.6	6341.15	6867.16	8197.42	8411.27	5590.47	4678.9	12215	15458	9947.42	14406.1	10221.5	8361.28	6536.54	5803.68	14501.1	6543.21	5988.82	5958.63	43872.5	12843.9	15855.4	14234.5	8191.51	9049.19	11492.1	12834.5	11782	8142.43	10536.9	6741.86	5808.78	26478.6	9682.95
FOLSYN-PWY	3374.46	11734.2	4977.35	6835.18	14265	10978.2	6968.32	10714.9	8768.61	13521.7	3388.27	11771.9	7323.61	6679.36	8504.95	11300.5	7485.59	8076.35	8352.58	8208.42	6071.35	6388.26	13397.9	20684.8	14416.9	14955.4	10509.8	9086.21	7628.13	5577.14	17263.8	7102.99	6170.02	6132.49	52624.5	15889.9	21864.7	16564.4	9752.03	9943.81	10749	12511.2	13527.1	9351.14	13597.1	7032.9	6074.8	32424.2	11170.5
FUC-RHAMCAT-PWY	981.403	2871.95	2471.09	3800.33	8490.72	2410.88	2817.59	2025.48	2648.85	3602.96	1189.82	2750.55	1485.71	1934.35	1932.52	3606.62	2161.3	2557.7	2702.16	1631.3	1424.01	1321.22	2639.91	3542.87	4010.54	3540.84	2635.98	2657.57	1908.05	1876.98	5044.39	1530.83	2144.12	1767.73	8508.64	3554.14	6725.34	5365.41	1857.13	1455	6626.71	4768.65	3018.91	1327.71	2699.15	2139.7	1238.07	8915.23	3377.75
FUCCAT-PWY	647.819	1634.38	2799.29	2904.73	8664.08	1340.53	2525.81	1288.51	1661.73	2606.92	1103.91	2189.85	905.995	1476.74	1105.91	2457.91	1727.05	1908.41	1852.62	860.089	929.271	1017.9	1480.76	1894.84	2338.22	2187.86	2010.46	1893.73	1435.3	1377.56	2859.89	867.368	1635.65	1090.54	5153.08	2213.54	4178.53	3541.34	1006.75	725.521	6023.02	3638.17	1603.25	692.129	1475.42	1535.57	688.537	4886.11	2049.01
GALACT-GLUCUROCAT-PWY	1621.71	4463.08	2215.69	4226.12	10934.8	5861.79	4327.49	2992.65	3556.72	6419.83	1224.21	5154	2121.02	3505.57	5217.22	5956.12	3146.17	4788.21	4450.76	5247.2	3607.84	2987.22	6405.52	10340.9	5897.31	6825.16	6309.57	4366.84	4057.69	3228.5	12836.6	3091.56	2653.07	2604.02	16142.2	6111.99	11706.3	6996.59	4819.3	5266.31	8036.68	7111.63	7458.93	3408.23	5674.43	4457.31	2819.97	23749.7	4868.19
GALACTARDEG-PWY	0	0	76.2112	0	397.61	0	33.7044	112.987	175.854	741.743	0	0	0	148.144	198.935	203.937	42.5933	0	91.6844	0	0	0	0	0	194.627	0	0	0	0	40.9775	16.889	29.2994	126.347	75.079	75.0009	0	0	0	49.6423	0	1460.96	204.726	0	87.9234	212.204	175.214	11.8828	212.637	38.9321
GALACTUROCAT-PWY	2333.65	8252.81	2220.62	5076.76	13408.3	7837.6	5143.37	5787.85	5638.52	8791.3	1896.51	7081.39	3183.9	4416.97	7377.3	8571.59	4749.69	5882.32	6394.32	7445.08	4492.73	4189.82	10562.9	17890.2	9433.38	10338.1	8234.95	5972.78	5454.67	4546.71	13906.7	5043.78	3994.07	3964.97	37880.5	9189.6	14827.3	10415.4	7649.27	9731.78	8724.86	9965.35	10392.8	6966.47	8972.29	5416.69	4312.18	28585.7	8266.75
GLCMANNANAUT-PWY	1873.91	4638.12	3897.57	5028.45	13989.2	6547.16	5556.41	4522.09	4705.2	7760.92	1652.75	6337.39	2970.6	4449.12	3903.15	5690.07	4278.86	4993.33	4911.97	4938.62	3286.2	2857.82	6320.47	7306.46	5416.16	8042.1	6065.52	4926.47	4108.48	3330.69	7049.16	3193.96	2924	3308.85	23006.2	6044.66	10143.7	7680.27	4411.98	5507.14	9133.28	7941	5306.92	3999.2	6573.29	4137.92	3133.09	14938.5	4311.51
GLUCARDEG-PWY	59.4307	177.894	1468.51	1872.24	2024.33	144.408	1416.47	116.078	343.649	1162.7	175.34	127.577	127.976	397.105	248.806	711.398	342.581	680.012	212.054	123.986	252.436	285.293	489.161	368.773	550.155	139.391	197.404	170.039	173.811	142.768	154.501	200.519	528.384	241.056	1038.76	115.488	2220.77	680.211	61.2315	15.8282	4810.8	1127	70.2463	87.9234	353.035	340.622	133	1338.71	281.801
GLUCARGALACTSUPER-PWY	0	0	76.2112	0	397.61	0	33.7044	112.987	175.854	741.743	0	0	0	148.144	198.935	203.937	42.5933	0	91.6844	0	0	0	0	0	194.627	0	0	0	0	40.9775	16.889	29.2994	126.347	75.079	75.0009	0	0	0	49.6423	0	1460.96	204.726	0	87.9234	212.204	175.214	11.8828	212.637	38.9321
GLUCONEO-PWY	4210.37	13657.6	5341.42	7826.31	18447.6	13986.1	8765.82	12549	10871.1	19783.6	4672.98	14841.3	8190.48	8496.12	10914.9	14038.4	9163.9	10400.5	10786	11160.4	8925.69	8409.82	16474.6	23960.5	18093.7	19884.9	14012.7	10451.6	9776.97	7663.66	20226.3	8851.57	7941.35	8301.51	58856	20230.7	24694.5	19207.4	11461.8	12707.4	12436.8	16066.6	16035.2	10726.2	15647.8	8851.96	7916.21	38170.1	12670.5
GLUCOSE1PMETAB-PWY	177.931	445.831	2454.33	2772.41	1067.21	118.898	2062.98	184.082	1169.49	473.237	614.449	497.441	86.2293	352.983	280.038	220.456	102.159	822.361	120.061	354.873	359.997	191.396	0	267.964	559.291	107.088	267.116	639.512	251.107	53.1771	191.851	297.136	487.533	117.517	33.3314	294.058	3609.05	517.954	29.3073	0	6228.97	1377.73	282.949	0	1159.71	294.2	449.325	1518.96	59.2012
GLUCUROCAT-PWY	1539.22	3873.19	2573.38	4200.99	11872.6	5812.46	4613.6	2536.72	3237.08	6382.35	1199.66	5100.36	2123.77	3753.04	5154.58	5704.9	3024.23	5047.38	4273.03	5000.45	3705.97	2971.14	5752.46	8936.36	5273.45	6390.31	6375.97	4193.41	4162.7	3156.58	14117.7	2814.98	2520.44	2505.69	12975.4	5838.07	11584.1	6604.42	4428.03	4564.91	8333.6	6879.69	7110.71	2854.89	5266.74	4562.3	2692.48	24399.4	4311.41
GLUTORN-PWY	3175.29	10220.3	4584	5482.53	13594.1	10975	7114.24	8003.46	6766.01	16123.2	4600.01	12235.7	5950.36	7628.52	7930.28	9754.21	7083.88	9597.87	7298.62	8003.89	8748.25	7608.09	10692.9	16457.5	13090.7	12898.5	12129.3	7539.87	7527.27	5903.34	12454.6	6178.81	6021.7	6109.19	37906.8	16749.6	16001.9	13305.8	8039	8697.25	9008.87	12264.4	9386.57	7325.35	11544.5	6855.82	6124.24	24107.8	8935.06
GLYCOCAT-PWY	5436.12	16816.6	6773.76	8857.1	22221.4	18325.8	12004	15400.6	13126.2	25551.2	6256.06	19238.6	10174.8	11570.8	13531.2	17437.3	11607	15295.9	14056.1	14276.1	10930.2	10379.9	19216	29062.2	23265.8	26064.5	18232	13563.7	12633.7	9876.12	24097.2	10564.7	9752.33	10329.9	69791.9	25924	28317.7	23484.6	13938.7	16891.1	14874.9	19443.5	20000.8	13177.8	19436.5	11137.2	9819.42	44445.7	16069.9
GLYCOGENSYNTH-PWY	4817.64	14888.6	6494.07	7754.29	19819	16565.8	11152.4	14737	11806.6	24235.7	5868.21	17646.6	9356.97	10679.6	12262.3	15848.9	10545.8	14108.7	12742.8	12465.3	9489.07	9876.75	16843	25056.1	20496.3	23127.6	16806.3	12174.2	11464.2	9023.4	19609.6	9429.74	8813.09	9359.34	64231.9	24624.6	21898.3	20840.7	12827.8	14125.4	12494.6	17275.1	17142.5	12167.8	17213.3	9858.8	8876.16	37496.6	13883.2
GLYCOL-GLYOXDEG-PWY	113.109	657.999	1927.13	3537.26	1048.71	151.844	1708.72	0	110.074	685.544	271.522	198.351	0	262.194	0	438.033	133.728	814.768	180.125	260.308	484.552	396.519	0	272.2	424.643	187.196	0	337.87	181.234	0	338.557	150	551.079	214.599	310.479	975.443	4550.14	861.072	410.973	0	5426.48	1419.33	149.831	0	199.315	41.9505	202.039	423.201	169.419
GLYCOLYSIS	4450.02	15183.9	5752.63	7978.08	20895.1	13484.3	8726.24	13138.3	12044.3	18640	5031.54	15051.3	6753.07	7820.62	9846.81	14249.8	8961.13	8095.16	11323.3	11330	9166	6490.8	16823.8	25448.3	19344.7	19447	13399.6	10949.3	9131.88	7227.1	21925.4	9135.25	8559.08	8462.36	64240.4	17890.6	25998.1	21199.7	11292.4	13256.2	13618.6	17188	17634.1	11663.9	15398.6	9705.37	8377.05	40902.5	14363.7
GLYCOLYSIS-E-D	935.331	1215.05	3452.69	4921.2	6778.56	848.758	4361.34	2303.46	3035.2	7388.9	348.789	2629.86	1489.26	3338.68	2424.49	666.047	2131.38	3223.74	1155.63	2273.8	4678.81	830.471	3857.57	3937.23	5742.31	5104.45	2098.39	1609.64	1296.23	0	4053.36	1683.08	2949.43	2561.19	14621	1668.04	9926.43	3873.79	2199.72	1437.96	9375.65	3549.1	3003.72	1330.99	3840.06	4322.2	3414.16	4229.65	2118.03
GLYCOLYSIS-TCA-GLYOX-BYPASS	218.042	113.231	3462.9	4627.38	2223.29	246.203	3579.88	0	194.873	1345.61	297.338	11.8774	0	856.148	0	187.78	252.083	1786.89	168.444	440.835	933.482	349.53	0	444.268	559.658	0	0	583.466	355.51	0	634.216	261.647	1024.86	391.247	0	229.856	7535.59	1492.9	0	0	9097.85	2379.36	262.774	0	353.826	76.0167	361.602	908.705	216.802
GLYOXYLATE-BYPASS	133.04	683.428	2402.7	4285.64	1465.46	154.755	2785.03	0	111.292	776.697	319.356	226.76	0	467.019	0	464.604	147.559	1222.41	187.141	266.522	554.154	2769.55	0	284.243	433.926	194.799	0	388.98	220.194	0	353.219	155.598	663.264	231.502	323.035	1140.54	6011.68	928.641	463.703	0	7854.34	1836.28	151.233	0	204.822	42.55	210.769	428.021	171.243
GOLPDLCAT-PWY	0	25.8399	248.878	51.6218	282.009	0	48.6097	0	27.5623	84.2935	0	19.0855	5.2444	0	0	0	38.9639	0	26.49	0	45.119	0	104.556	0	123.464	0	55.7596	115.447	0	45.4102	0	0	23.954	59.7067	143.023	13.401	0	191.589	78.3941	0	282.219	81.6629	0	0	59.3377	0	11.9815	13.925	26.2596
HCAMHPDEG-PWY	0	0	42.5455	0	22.9091	0	18.5455	0	0	0	0	0	0	7.63636	0	0	0	0	0	0	0	0	0	0	12	0	0	0	0	0	9.27273	16.3636	72.5455	0	0	0	0	0	0	0	646.909	81.8182	0	0	0	0	6.54545	9.27273	0
HEME-BIOSYNTHESIS-II	194.632	544.624	1618.2	2009.28	559.758	71.7393	1418.95	373.955	777.996	368.382	102.426	206.488	178.239	300.645	258.332	255.375	294.396	542.591	46.4585	126.106	332.237	1824.54	220.065	157.577	277.768	123.627	284.274	183.25	95.7132	0	180.445	318.693	280.157	176.44	1572.36	715.85	2411.77	441.569	1018.82	43.0852	4661.48	710.168	512.176	202.109	637.375	74.2623	132.673	1242.14	224.318
HEMESYN2-PWY	341.444	1647.04	2252	2810.56	999.871	451.238	2384.09	618.512	1908.7	1448.44	410.704	2024.63	242.262	778.013	985.203	730.014	466.151	1073.51	889.062	1117.86	3263.73	4380.81	1785.87	892.465	2358.08	1879.85	935.232	1178.35	614.715	73.4852	2331.12	847.113	829.37	586.356	1944.97	2256.61	5035.43	1547.74	1395.32	2231.99	6649.75	1397.3	1159.61	411.12	2971.87	593.721	899.264	2367.29	1129.71
HEXITOLDEGSUPER-PWY	239.061	922.515	3421.29	2555.19	6062.54	955.762	2731.03	1000.64	1346.12	2718.52	260.877	1748.55	1128.62	1474.04	1385.56	1296.04	1379.76	1252.71	1151.21	1384.97	2229.33	726.577	1693.6	2149.18	2305.54	2383.62	946.913	1284.3	966.964	666.313	2191.24	1092.51	1329.31	510.521	5577.49	1078.35	4491.33	2897.05	1108.97	907.801	6649.05	2566.61	1835.52	899.211	2006.97	2089.82	537.01	3351.71	597.088
HISDEG-PWY	1272.2	5958.02	407.089	2001.84	6564.34	4013.28	1224.83	5600.08	3874.54	5177.72	835.689	4288.75	1051.56	1406.08	3057.78	5580.55	2555.95	1072.5	3624.37	3875.66	1786.71	1401.63	7717.42	12589	8222.79	6142.99	2996.21	3239.23	2839.29	2228.64	10416.4	3522.49	2442.21	2594.58	29280	5746.47	12208.5	8629.88	4149.1	4747.26	1820.28	4234.67	7951.72	5123.33	3737.21	3264.4	2704.52	20351	6064.97
HISTSYN-PWY	4142.66	13443.6	4589.7	6663.87	17470.4	13919.8	8835.69	12769.8	10600.5	19641.1	5496.8	15079.1	8499.15	8881.69	10587.5	13250.4	9103.97	10972.4	10669.5	10602	8957.25	8055.13	15145.1	23404.9	17597.2	19842.9	14151.8	10008.3	10114.3	7382.56	18982.7	8784.5	8223.99	8344.28	57488.3	20952.1	21627.1	19068.2	10664.6	11998.2	10836.7	16358.9	15258.1	11061	14925.5	8925.56	7803.39	35182.1	12410.1
HOMOSER-METSYN-PWY	1142.47	3285.95	4117.43	4276.71	9028.5	3022.51	4090.78	2274.25	4150.21	5369.85	807.009	3671.73	2113.56	2979.57	4599.85	3617.75	2537.58	4994.92	2876.63	2764.37	3012.14	4603.89	4140.89	5295.95	3324.57	5427.2	4740.21	3321.2	2377.81	2142.7	4532.87	2256.01	2330.78	1577.7	8674.69	8894	7272.76	5874.03	4023.28	4442.88	8136.31	7042.1	3626.8	3313.36	8281.07	3413.7	2376.42	8171.41	1120.25
HSERMETANA-PWY	1207.33	3513.18	4606.1	4592.04	10310.2	3140.5	4388.82	3161.21	4494.16	5675.63	1285.83	4395.6	2209.53	3167.22	4986.9	5258.36	2679.95	5411.82	3037.43	2905.05	3264.82	5707.74	5216.01	5526.43	4351.34	5734.46	5052.28	3524.97	2477.74	2262.82	4765.06	2367.94	2467.03	2204.65	8925.39	9760.7	7757.14	6261.62	4310.3	4734.34	8590.77	7683.39	3787.85	3507.22	9115.37	3730.46	2538.16	8526.09	2371.62
ILEUSYN-PWY	5087.13	16619.6	6065.09	8309.35	24198.7	17222.5	11577.3	15582.5	13217.4	23671	6610.23	18135.8	10306.1	10992.1	12934.5	17155.6	11210.8	14033.3	12943.4	13191	11231.3	11929.1	19238.6	27646.7	20941.6	24073.4	17545	12876.2	12024.1	8995.25	22387.7	10625.6	9956.66	10311.7	70299	25076.9	27323.9	23349.1	14110.6	14692.7	14195	19740	18538.4	12831	19239.2	10956.1	9678.66	43081	14951
KDO-NAGLIPASYN-PWY	271.627	105.119	1634.82	3145.92	2190.87	293.806	2032.35	530.066	1796.64	1392.73	348.607	10.6208	0	892.128	902.578	191.481	276.456	1540.37	171.237	847.882	911.117	469.734	0	494.398	580.147	263.43	0	1039.75	397.704	0	720.527	874.644	987.271	417.788	0	487.562	7944.51	1700.84	94.5304	0	5425.12	2352.12	583.244	0	2922.44	83.6268	858.272	4815.76	229.21
KETOGLUCONMET-PWY	0	0	109.834	0	0	0	0	0	0	66.2027	0	0	0	86.4533	0	0	0	71.3538	0	0	0	0	0	0	0	0	0	0	0	0	27.6598	0	0	0	0	0	0	59.6436	0	0	85.5521	0	0	0	0	0	0	121.595	0
LACTOSECAT-PWY	58.3649	108.601	589.138	41.8113	348.55	133.477	49.5171	140.656	158.384	400.617	70.7896	0	0	361.678	0	65.8111	48.4557	147.967	144.348	50.3949	96.3833	54.237	40.9238	0	20.878	153.124	186.353	186.509	0	0	104.485	179.189	53.9356	0	324.199	74.6094	79.9901	504.176	0	0	715.697	892.022	143.394	101.238	81.6752	0	26.1424	569.34	64.7935
LEU-DEG2-PWY	48.4565	506.128	0	0	0	11.7986	25.0545	0	0	0	86.3915	269.797	0	0	0	330.963	0	0	94.3927	0	0	2311.04	461.252	28.0366	212.94	169.327	0	0	0	0	0	0	0	0	330.132	820.815	0	0	484.591	0	0	192.714	0	40.8776	0	0	0	0	45.6107
LPSSYN-PWY	0	0	230.459	0	108.693	0	87.7179	0	0	0	0	0	0	50.8092	0	0	0	0	0	0	0	0	0	0	55.7383	0	0	0	0	0	54.9285	76.0622	291.958	0	0	0	0	0	0	0	2241.14	361.664	0	0	0	0	31.3276	64.4895	0
MET-SAM-PWY	1596.7	4632.85	4900.03	5330.12	11456.5	4276.76	5333.48	3273.65	5502.99	7468.19	1175.02	5158.65	2959.38	4046.32	5974.1	5050.08	3534.81	6412.18	3982.92	3855.88	4137.13	5841.7	5815.03	7483.21	4787.54	7534.65	6390.85	4566.43	3332.96	2953.39	6330.63	3159.94	3224.73	2272.04	12714.6	11523.9	10053.9	8102.44	5403.99	5913.49	10019.5	9160.46	5105.45	4560.37	10349.4	4540.02	3287.59	11497.1	1678.07
METH-ACETATE-PWY	872.4	1947.58	2552.49	1243.96	1828.94	2412.75	2310.53	3430.39	2308.02	3290.09	549.708	2864.82	1220.93	2247.39	1602.33	3110.26	2329.9	2164.89	2703.5	1362.26	1204.24	1338.07	1715.48	2924.1	2454.71	3825.53	2792.49	2447.96	2538.2	2140.78	4343.03	1288.67	1401.59	1188.62	10702.4	3576.85	3407.18	4003.11	1677.03	1718.75	2892.88	2848.38	2827.4	1467.35	2470.25	1703.32	1517.21	6030.24	3138.3
METHGLYUT-PWY	64.0368	32.6065	1581.98	2182.96	561.463	67.4242	1306.56	0	66.6847	306.787	109.367	3.30634	0	155.989	0	57.8671	59.9398	489.023	47.8792	132.393	228.103	104.393	0	112.088	160.475	0	0	181.804	86.6613	0	141.549	84.5954	270.372	95.3601	0	66.9846	2577.52	374.226	0	0	4446.62	753.858	75.9683	0	121.734	17.6852	109.885	157.83	58.4889
NAD-BIOSYNTHESIS-II	293.121	240.008	2156.61	2908.53	4634.63	411.022	2355.7	347.395	797.072	1047.63	237.744	109.99	389.774	676.442	511.617	600.231	441.949	923.489	441.045	380.282	620.232	335.556	448.008	617.003	554.914	634.296	331.406	740.628	344.377	254.827	721.618	533.186	521.53	203.835	1306.48	704.756	3770.57	1286.66	77.6697	0	5799.61	1671.74	389.646	383.196	1515.07	442.727	417.749	2831.79	398.317
NAGLIPASYN-PWY	1689.8	6933.19	1690.98	3770.39	6772.71	4729.39	2401.29	6211.31	4934.46	6454.75	1287.13	5502.54	4152.72	2541.33	4485.13	5999.49	3495.08	2649.36	3871.3	4225.28	3815.81	4303.87	8464.49	13636.9	9339.38	7856.46	3736.44	3695.24	3316.49	2196.17	10597.2	3992.08	3055.27	3385.02	33283.3	8003.23	15461	8934.53	5823.58	4907.26	5846.66	5698.75	8350.03	5620.11	6992.31	3870.11	3431.87	20692.7	6432.69
NONMEVIPP-PWY	4372.3	14736.1	4862.8	7261.53	18360.7	14734.4	9248.83	13497.8	11461.3	20680.5	5639.75	15792.7	8888	9351.01	11512.3	14662.1	9565.46	12206.7	11209.8	11562.9	9389.65	8932.37	16597.6	23888.5	19059.8	21224.8	15211.6	10481.9	10174.5	7869.47	19522	9149.8	8398.46	8805.58	62093.4	22164.7	23858.9	20100.6	12259.2	13322.9	10863.5	16220.7	16966.8	11535.1	16493.8	9207.23	8404.76	37915.2	13553.1
NONOXIPENT-PWY	6157.78	20514.6	8600.36	11250.2	31096.3	21520.6	14358.7	18031.8	16485.6	30260.1	7940.78	23186.4	11932.4	13671.1	15923.7	21718.3	13568.5	16922.7	16565.4	17052.2	13945.8	12772.4	23643.2	31960.5	26949.2	29903.9	21925.5	15418	14717.6	11784	28276.8	13232.9	12214.1	12763.9	82431.6	29687.7	32321.7	29726.2	16651.6	19094.4	18877.5	24525.2	23237.1	15479.8	22923.1	13802.8	11635.2	56345.2	19217
OANTIGEN-PWY	2945.82	9717.11	3940.51	5212.28	12579.8	9772.75	7089.82	9235.84	8358.6	14808.4	4258.47	10846.7	5593.14	6652.78	7069.68	9008.96	6360.56	8779.26	7579.89	7673.33	7373.52	6586.31	9838.56	12715.1	12995.6	15209	9886.07	7426.4	7420.94	5240.59	12111.3	6140.6	6084.87	5967.97	39833.2	15251.9	15473.5	12852.1	7601.01	8542.08	9609.42	11763.6	10858.7	7095.92	11103.6	6509.84	5874.64	22801.1	8332.23
ORNARGDEG-PWY	62.9426	29.9195	1744.01	2154.09	681.387	72.6998	1456.99	0	58.6542	390.551	107.043	3.05693	0	272.376	0	53.8279	73.141	601.375	47.2719	109.889	229.789	93.4594	0	114.348	154.192	0	0	188.937	92.7842	0	185.139	70.1498	301.579	99.2236	0	59.5336	2587.66	472.9	0	0	4970.35	797.569	73.2457	0	99.694	22.4003	87.9625	318.956	60.347
ORNDEG-PWY	59.3731	26.0051	1472.7	1795.64	588.785	67.1896	1114.58	0	52.7128	443.171	76.6861	2.65523	0	327.099	0	44.2114	63.0791	523.11	42.541	119.213	272.924	91.6565	0	116.716	145.364	0	0	170.767	98.1545	0	195.034	73.142	268.681	106.486	0	53.5643	2165.57	383.997	0	0	4363.4	568.115	70.1104	0	99.9548	20.8785	98.7289	401.632	55.6008
P105-PWY	349.725	193.78	3337.3	5065.9	2729.47	357.93	3626.91	0	341.739	1904.94	560.017	19.8486	0	1229.53	0	342.337	389.028	2238.09	285.831	520.3	1000.26	646.161	0	585.405	925.677	0	0	914.617	401.219	0	940.115	337.074	1305.5	429.473	0	397.018	8948.05	2204.23	0	0	9088.34	3406.06	403.321	0	522.87	123.749	382.536	1663.65	363.381
P108-PWY	2413.54	10172.5	782.252	3961.37	12502.3	7226.58	2906.37	8841.12	7230.45	9714.74	2185.8	7977.48	5661.02	3753.67	6184.23	9278.88	5087.02	3382.28	6237.86	5910.99	2879.38	6260.44	12317	19217.5	12979.4	11433.3	5583.43	5656.03	5003.82	3687.7	15308.4	5759.87	4559.21	4837.16	47038.1	11455.3	19694.5	13325.8	8099.17	7303.12	4383.57	8747.8	12026.5	8142.88	9346.23	5687.56	4761.17	29158.2	9243.87
P122-PWY	1127.13	2702.38	623.361	77.6906	2581.81	2626.05	1389.49	1000.52	953.163	4622.6	1563.57	2634.17	1564.86	1786.65	1660.38	2169.76	2769.95	1198.86	1209.35	1348.18	1205.99	1150.19	1945.11	1294	1127.77	2172.11	2260.95	1246.92	2167.95	1272.17	1803.95	2309.81	2134.67	1631.35	6599.45	4610.56	3367.98	3569.76	1445.44	1289.5	1742.35	4754.91	2625.47	2078.92	1408.97	1939.93	2037.41	4869.28	2022.67
P124-PWY	1466	3301.37	733.685	88.8645	3097.24	3433.74	1710.24	1190.31	1117.91	6365.29	2474.76	3448.05	2518.42	2732.02	2063.4	2659.6	3952.69	1630.16	1452.09	1605.98	1509.38	1532.12	2314.23	1490.5	1315.13	2631.78	3011.56	1484.33	2809.95	1591.39	2105.76	2968.97	2781.06	2106	7764.61	6567.97	3987.8	4390.91	1773.73	1517.89	2003.41	6087.54	3131.74	2506.57	1692.75	2380.63	2661	5669.81	2413.9
P125-PWY	0	340.948	127.535	85.3907	535.464	170.274	142.211	125.199	473.325	419.452	497.23	149.909	269.427	161.873	47.3876	428.557	239.125	143.191	147.268	73.1694	27.3554	22.0175	28.5716	91.6353	359.549	237.817	512.528	245.453	169.256	219.202	176.78	242.833	463.823	284.954	308.615	706.479	238.291	472.778	0	11.8807	763.93	786.449	98.9381	0	181.505	132.121	93.0422	602.756	327.04
P161-PWY	2616.55	7581.54	4987.58	5663.89	14268.9	9390.46	7896.69	7463.4	7468.45	10539.2	3765.8	9468.77	4815.33	6359.98	6793.72	9053.48	5742.7	9705.18	7366.34	7388.99	5546.31	4990.07	9358.48	10044.5	6730.27	14625.5	10448	8310.88	6993.83	5652.19	11421.3	5097.56	6193.11	5536.33	30905.2	13912.4	11099.1	10599.1	6277.99	9785.31	11659.9	11191.4	9046.5	6023.07	13000.2	5394.77	4574.04	20093.8	7684.82
P162-PWY	0	392.262	64.6663	189.911	601.537	217.049	610.746	879.706	548.714	2120.64	0	501.619	0	714.648	617.121	684.367	159.306	205.234	260.324	196.614	167.17	793.665	772.983	178.024	599.797	498.004	115.124	311.986	112.321	130.895	149.3	367.216	200.772	88.305	1022.74	1004.03	298.089	346.701	154.933	0	229.709	251.247	258.672	386.239	1002.85	318.043	124.73	1085.24	217.861
P163-PWY	249.171	740.662	0	0	1813.8	943.186	470.244	670.324	586.151	1480.02	400.792	1223.42	671.471	497.924	207.656	1100.03	414.862	371.869	1396.83	506.376	0	400.296	1223.48	388.092	436.458	748.247	276.02	55.0714	664.148	964.701	1672.16	389.13	672.738	600.021	1830.56	1483.51	1323.89	1960.82	851.924	674.443	489.324	1019.64	766.751	640.3	696.433	1029.7	612.103	1193.17	334.592
P164-PWY	1133.13	2401.43	1504.4	1230.57	8115.02	3173.26	2715.08	2462.08	2114.63	5155.08	1013.76	2750.22	1678.27	2357.63	1811.53	4302.86	2092.45	1891.65	2265.28	2216.18	1637.17	2093.55	3771.97	2995.57	2562.61	3221.42	2666.82	2431.49	1850.71	1952.05	3055.76	2176.01	1970.89	2382.16	9213.3	3611.21	3693.13	4327.8	2806.67	1454.64	5361.42	3413.7	2204.02	1769.13	2367.45	2746.42	2122.9	7749.58	2219.09
P221-PWY	0	573.882	835.581	502.427	713.332	533.08	584.241	480.89	179.023	872.273	173.416	591.503	488.305	500.183	133.75	483.156	725.803	565.994	428.107	238.197	331.63	621.822	276.996	739.57	751.327	709.753	682.911	908.55	467.573	380.405	314.743	435.857	590.487	0	2804.16	388.011	463.715	1232.2	372.029	270.12	338.832	259.383	340.841	265.019	669.296	504.091	83.0235	1674.23	398.576
P23-PWY	567.972	1068.24	2963.29	4899.07	5556.61	823.542	3685.85	1812.59	2896.15	1964.54	366.133	1148.81	605.033	1548.77	1650.7	695.843	1230.01	2282.5	1157.82	995.793	2478.84	718.669	387.914	1600.69	1925.55	1518.86	722.878	1380.71	1332.23	0	1418.93	1546.9	2219.86	1134.95	6927.8	606.538	10058.6	3800.56	920.569	121.144	9096.71	3653.36	1264.19	768.342	3473.93	2315.41	1763.24	4484.41	514.028
P341-PWY	0	0	0	0	0	0	0	0	0	0	0	0	0	0	0	0	0	0	0	0	0	0	0	0	0	0	0	0	0	0	0	0	0	0	94.9232	0	0	0	67.3016	0	0	54.9074	0	0	47.4265	0	0	0	0
P4-PWY	2187.58	6963.14	4541.8	5164.33	13043.1	5617.84	6134.96	5622.79	6462.55	11014.4	2128.7	7797.14	3340.19	5531.2	5375.44	7359.71	4858.88	6427.71	5383.02	5198.63	5843.87	6906.06	8285.41	9011.86	7876.16	10012.7	8004.85	5873.64	4551.64	3853.09	8913.58	4499.23	4649.9	3982.14	22480.2	9887.32	12696.5	10360.5	6281.67	4036.55	10127	9191.22	6145.84	5635.1	8313.02	5482.94	4737.86	15029.6	3621.68
P42-PWY	3819.67	15427.5	3220.91	6508.72	15847.5	11652.3	5068.21	13470	10865.7	15696.5	3686.67	12671.6	7455	5413.27	9595.32	13194.6	8099.35	5684.99	9887.22	10410.5	7916.36	7460.18	18673.2	29031.2	20301.1	18678.7	9854.7	9363.63	8142.26	6103.87	23853.2	9393.49	7695.81	7778.98	72293.5	17007.7	28532.3	20716.3	11561.6	12244.6	10866.4	14803.9	18397.3	12662.6	13738.2	9151.83	7775.88	45145.9	14477.4
P441-PWY	1491.6	2210.68	4380.79	5738.14	10399.6	1641.04	5835.57	3709.28	4584.59	9599.79	661.691	4418.76	2506.07	5083.5	3667.71	1299.66	3381.73	4957.65	2112.7	3669.11	5554.65	1455.69	5857.07	6110.52	7297.58	7836.1	3669.5	2776.93	2245.92	0	6303.8	2670.18	4001.99	3688.96	21526.6	3046.18	12415.6	6186.51	3494.12	2599.1	10811.9	5785.09	4753.17	2310.97	6027.11	5281.46	4272.35	7813.05	3474.5
P461-PWY	240.196	1098.24	4793.2	3474.37	4131.29	1318.55	2632.47	1120.45	1251.21	1853.03	168.365	1341.24	1200.55	1312.25	1030.4	924.211	1038.66	677.013	1608.06	1051.93	1832.46	946.058	1723.91	1632.72	2315.51	2346.94	984.243	1905.31	989.676	642.378	1871.89	833.268	1227	741.121	6337.68	744.034	3918.3	2890.92	915.708	656.292	7205.96	1433.71	1578.55	812.362	1634.33	2002.77	529.453	2174.25	226.236
P562-PWY	0	240.805	643.022	241.399	3123.37	235.91	367.961	0	225.327	473.123	0	410.197	265.959	139.342	259.185	416.221	411.075	0	485.169	237.805	252.757	276.674	387.082	328.863	571.819	449.752	134.084	343.302	240.923	258.034	507.562	346.014	66.6393	120.379	917.216	252.998	243.373	842.834	256.115	260.598	312.828	610.539	323.488	285.294	318.496	684.628	0	609.05	115.399
PANTO-PWY	3016.76	10619.3	4557.7	6100.89	11303.9	10037.8	5743.07	9825.69	7268.8	14469.3	2817.86	10848.5	6630.74	6074.87	7477.06	9900.33	6578.05	8156.83	7131.81	7853.44	6753.54	6432.17	11920.2	18247.5	15105.6	13037.2	9235.4	7521.24	6619.08	5004.23	16189	6310.69	5180.8	5836.08	45714.6	13821.7	19622.3	14526.4	8568.47	9183.32	8966.84	11158.1	12215.1	8455.64	11605.9	6363.04	5457.97	31432.3	10405.6
PANTOSYN-PWY	3229.94	11135.9	4603.65	6134.93	12254.9	10559.3	6382.13	10742	8076.68	15324.7	3158.07	11625	6963.59	6620.82	8094.97	10677.8	6911.81	8843.17	7874.32	8364.15	7242.42	6591.33	12545.9	19387.8	15490.8	14592.7	10089.2	8192.94	7145.94	5428.28	16183.4	6570.91	5738.1	6253.87	49490.1	15286.9	19931	15585	9252.41	9819.95	9264.87	11932.8	12914.8	8914.87	12486	6684.5	5868.91	31611.5	10642.8
PENTOSE-P-PWY	2096.57	8037.98	3442.44	5686.98	11460	5619.41	4353.67	6433.02	6698.89	7865.24	1797.11	5887.75	1906.73	2257.32	4845.69	7171.65	3738.39	2358.28	5784.24	6072.28	3296	2549.43	9371.78	16125.1	11035.4	9313.73	4512.36	5923.25	4708.74	3456.61	13154.7	4826.32	4124.44	3645.17	37737.7	6985.82	15653.4	11042.9	5039.55	7345.49	9888.51	8985.47	10558.8	7185.17	6693.07	5577.98	3790.75	28501.1	7997.34
PEPTIDOGLYCANSYN-PWY	4177.13	13782.5	5083.13	6856	18238.5	14223	9199.05	12994.4	10979.7	19979.6	5597.93	15265.2	8780.14	9281.52	10865.5	13887	9336.97	11641.1	10753.8	10885.6	9086.42	8692.77	15872.3	23126.6	17342.4	20423.1	14666	10490.5	10081.1	7574.39	18845.5	8901.65	8242.75	8526.75	60083.6	21527.5	23065.3	19515.6	11615.6	12452.7	11428	15886.5	15762.6	11016.8	16155.2	8828	8129.05	35532	12600.5
PHOSLIPSYN-PWY	4375.19	13294.8	6075.7	7694.34	18915.9	14386.3	10547.3	13186.9	10871.1	20928	5891.68	16286.4	8389.37	9860.82	10728.4	13903.6	9586.52	12802.6	11236.1	11092.6	9100.93	9330.41	15977.1	23082.2	17132.5	20629.5	15809.9	11554.8	10533.8	7942.16	18777.7	9077.55	8485.75	8736.87	61099.6	21247.6	23454.5	19343.7	11321.1	12946.4	14158.8	16740.8	15456.8	10954.9	16212.7	9099.33	8237.68	34503.8	12540.8
POLYAMINSYN3-PWY	420.543	1188.74	1528.32	1242.93	1124.53	663.27	1662.39	1680.24	1017.33	3073.25	305.693	1615.66	429.494	1372.35	1542	578.183	498.164	1528.6	1023.76	1092.5	1471.98	1341.33	1354.29	1583.24	2300.98	2148.6	1685.34	1180.63	901.81	0	1651.91	731.534	782.964	1073.02	4350.79	1944.54	993.128	1223.35	1470.95	1016.34	1960.14	1464.07	1101.49	720.843	2644.57	921.284	1070.71	2716.49	946.746
POLYAMSYN-PWY	435.513	1195.07	2122.19	3024.16	2088.49	640.891	3028.51	1775.6	1060.92	3094.05	318.596	1639.76	423.301	1613.17	1517.64	644.849	492.001	1667.32	1034.03	1125.79	1528.04	1640.38	2336.67	1535.56	2240.43	2239.75	1689.9	1183.59	945.414	301.1	1739.94	1099.73	1196.8	1156	4513.92	4145.23	4673.1	1274.54	1564.91	1000.15	6443.8	2001.58	1108.44	717.744	2643.91	946.307	1135.24	2777.96	960.98
POLYISOPRENSYN-PWY	2819.7	10424.9	3235.21	5400.42	11915.8	8710.36	5086.19	9506.65	7928.18	11732.5	2740.82	9672.92	6317.88	4907.05	7424.06	9876.18	6096.88	5845.74	6809.2	7107.68	6338.58	6668.67	12362.2	18706.5	13639.9	13686.4	7917.63	6783.49	6099.53	4344.15	14905.6	6325.77	5355.5	5600.02	47028.8	13758.4	19504	14018.6	8662	8336.19	8854.49	10194.3	12092.7	8201.03	11386.2	6196.4	5581.95	28543.9	9549.53
PPGPPMET-PWY	98.5834	33.2792	2732.62	3364.66	945.063	97.1167	2307.19	178.676	808.684	536.647	144.112	3.32457	0	406.152	342.449	61.542	92.7281	983.453	55.6136	321.662	357.615	163.626	0	159.502	191.622	84.7393	0	432.791	138.662	0	237.746	334.824	426.387	145.778	0	160.816	4216.51	631.476	29.9557	0	7159.01	1145.99	193.465	0	1424.32	26.629	340.864	1862.55	73.8341
PRPP-PWY	2039.75	8214.56	3746.22	5382.01	8784.02	4475.23	4853.14	6955.05	5923.23	9198.25	2224.12	7991.89	3712.69	4483.65	5333.69	5903.33	3940.2	5105.27	4808.2	4839.92	6378.48	7030.36	9546.89	8853.04	10366.7	9852.14	5937.8	3505.25	3828.78	2408.35	10851.9	4244.7	4318.7	4658.42	26507.8	9931.12	15941.9	10767.7	6407.14	2291.05	9900.37	7492.53	6357.39	4196.17	9343.67	4621.79	4770.85	12752.4	6793.53
PWY-1269	1691.86	6753.16	1900.52	3836.66	7274.85	4666.84	2617.07	6466.6	4930.87	7263	1245.87	5344.63	3933.61	2824.06	4348.86	5781.62	3455.96	2895.68	3844.28	4297.12	3950.36	4202.19	8758.6	12661.4	8928.53	7396.32	3774.55	3498.16	3386.05	2266.25	10906.8	4050.87	3136.58	3314.55	32799.2	7708.14	16141.9	9163.57	5516.29	5004.61	6421.85	6020.09	8388.54	5807.87	6896.49	3778.37	3489.82	22941.9	5986.69
PWY-1861	850.758	2082.42	3542.89	995.428	3659.28	1101.11	1700.98	901.046	1837.97	2241.26	944.228	931.123	2173.75	1645.6	2163.27	2374.85	1174.09	909.182	2091.48	558.348	1157.03	928.081	1319.94	2113.33	1565.1	1991.2	951.413	2672.55	1723.05	495.435	1264.19	1030.29	1003.97	154.536	3628.52	927.652	1192.67	3289.2	605.584	0	2441.36	2250.01	1867.46	1258.26	1213.4	1293.08	528.731	2499.01	355.289
PWY-2941	760.445	1700.54	655.93	616.608	1423.47	889.229	1368.84	1028.49	2373.97	4507.86	761.193	1040.02	514.981	2364.47	1862.99	1436.48	1575.53	1257.68	1734.41	953.274	1450.45	537.647	3610.09	1926.43	1141.91	1134.65	1889.52	1484.23	1187.44	1242.21	1159.01	1349.71	1047.08	660.83	5524.3	1074.16	2223.05	1527.04	1724.55	2155.22	2162.2	2831.95	889.687	2589.44	1863.46	1589.43	1483.55	4010.95	724.815
PWY-2942	4760.41	16351.9	5663.9	7987.52	22105.9	16337.8	10552.9	14738.6	12962.7	22412.5	6254.32	17398.9	9796.17	10458	12393.3	16259.8	10638.8	13061.8	12534.5	12879.2	10297.9	9865.84	18343.6	26818.7	20106.8	23725.4	16582.1	12037.5	11472.8	8893.81	22855.4	10207.6	9549.27	9720.77	68542.7	23829.5	26349.6	22851.6	13226.1	14623.1	13093.7	18553	18856.7	12651.4	18451.9	10240.7	9291.78	43890.5	14702.9
PWY-3001	4749.26	16004	5744.94	8096.2	20233.2	16232.4	10473.5	14431.2	12104.2	22388.6	6145.53	16943.6	9904.22	10417.6	12350.7	15576	10690.9	12936.6	12045.8	12479.5	10126.7	9930.22	17972.8	26952.4	19996.4	22726.9	16287.9	12107.2	11442.9	8678.87	21773.1	10235.3	9255.99	9500.05	67829.7	23646.7	26462	21952	13020.2	14075.3	13235.1	18436	17896.4	12535.1	18291.2	10241.8	9208.85	41964.6	14457.7
PWY-3781	67.581	4092.64	0	0	0	11.9955	25.9644	0	0	0	401.712	1373.79	0	0	0	2031.98	0	0	394.033	0	0	11719.5	538.286	119.831	1057.32	1140.28	0	0	0	0	0	0	0	0	1882.86	5974.22	0	0	2925.78	0	0	433.199	0	49.9283	0	172.783	0	0	214.844
PWY-4984	1178.28	2088.09	339.933	2966.25	6593.7	1859.68	318.929	2174.45	2972.81	2184.33	489.837	1363.89	641.779	706.026	2058.43	4748.25	1163.49	848.484	688.414	1026.92	1087.7	419.009	1413.61	3661.46	8131.32	2894.42	1547.07	1216.02	2209.69	103.261	8698.7	1781.53	2075.48	1717.2	7748.42	2133.58	6164.78	2411.9	673.508	1143.79	1510.53	4501.07	6883.52	1074.17	1892.77	2731.63	1193.48	14626.1	1725.23
PWY-5005	40.2564	123.186	111.508	288.552	465.267	111.175	619.979	291.788	1151.04	1267.25	50.0891	70.2612	148.089	891.724	329.736	75.7194	87.699	145.328	60.1791	104.496	63.4414	128.704	222.414	89.1532	153.011	139.864	75.9217	436.686	107.748	64.5865	69.388	334.707	109.146	85.1625	1080.85	57.4038	469.764	214.024	46.5851	0	590.69	28.7386	307.483	168.069	855.595	0	332.721	844.766	57.3733
PWY-5022	141.262	261.279	297.484	239.418	2490.11	371.165	1199.91	806.246	316.975	857.565	209.487	443.092	114.526	558.903	354.162	476.316	335.06	449.522	295.094	274.532	257.826	440.089	561.062	357.677	534.392	274.395	144.148	552.421	465.992	99.4072	647.625	295.358	609.338	488.517	1936.75	549.496	1803.46	1187.74	664.101	0	2202.63	1101.57	271.401	269.776	430.461	339.57	360.877	1546.17	199.666
PWY-5028	0	0	178.597	0	196.505	0	0	0	0	0	0	0	0	0	0	0	0	0	0	0	0	0	0	0	0	0	0	0	0	0	0	0	0	0	0	0	0	241.018	0	0	218.513	0	0	0	0	0	0	14.9937	0
PWY-5097	4708.57	16049.6	5671.98	7880.57	21343.5	16180.6	10485.2	14117.4	12546	22167.3	6068.34	17204.5	9879.69	10412.5	12289.3	16068.1	10512.7	12992.3	12307.7	12705	10219.6	9828.63	18146.2	26513	19804.3	23427.2	16455.4	11888.6	11285	8778.12	22391	10044.5	9331.67	9539.13	67084.9	23031.5	25847.1	21841.1	13080.6	14598.6	12743.1	17725.6	18395.7	12442.7	18381.7	10041.6	9154.84	42233.4	14550.5
PWY-5100	4390.25	13792.3	6014.26	7085.86	21196.9	15249.8	9777.21	13725.9	11768.3	21176.8	5800.64	15778.4	9084.95	9880.32	11158.2	14927.2	10109.2	12373.6	11653.8	11295.2	8676.57	7180.17	16438.1	23742.9	17541.7	20574.3	15260.5	11026.7	10939.5	8522.28	20652.2	9510.52	8345.1	8534.19	64524.1	21464	23870.2	21053	11815.8	13218.8	11806	17334.6	16367.8	12023.3	16448.9	9843.12	8149.38	40435	12791.4
PWY-5101	5515.83	18077.3	6731.8	9007.08	25718.6	18631.9	12293	16838.3	13947.2	25739	7168.93	19786.5	11185.8	11940.7	14072	18568.1	12208.6	15196	14088.9	14376.5	12441.8	12765.9	20901.4	30077.9	22908.4	26294.5	19046.5	13954.9	13049.2	9794.56	24424.6	11569.7	10736.6	11173.6	75840.2	27216.5	29621.3	25331.3	15119.1	15991.4	15274.6	21347.9	20083.4	13938.1	20902.9	11948	10503.7	46587.1	16277.7
PWY-5103	4738.34	15719.4	5738.45	7878.94	21242.1	16222.5	10810.7	14537.1	12440	22471.6	6259.77	17120.1	9774.7	10363.9	12243.8	16056.2	10627.1	13133.1	12171.9	12535.1	10611.7	10546.9	17770.6	26297.9	20012.9	22963.1	16497.5	11926.4	11399.5	8560.13	21238.6	10049.8	9157.38	9501.28	65259.6	23727.6	25727.2	21822.8	13135.6	13908.7	13155.8	18614.2	17741.8	12254.7	18249.6	10397	9055.23	40528.7	14176.1
PWY-5104	5174.78	16815.5	6391.58	8166.81	24975.1	17600.6	11407.9	16294.2	13144.1	24385.2	6772.44	18773.3	10435.3	11202.5	13021	17295.1	11488.9	14239.9	13440.4	13485.5	11867.1	10391.3	19758.3	27568.5	21210.8	24191.8	17905.6	12667.2	12253.2	9421.45	22854.6	11027	9997.95	10602.6	72205.1	25056.9	27495.8	24225.5	14196.4	15182.7	13896.5	20272.8	18528.8	12988	19322.8	11412.6	9927.74	44261.3	15092.9
PWY-5121	4223.35	14020.5	4481.16	6560.09	17765.6	14279.7	8837.42	13063.3	11008.4	19967.3	5515.66	15286.5	8725.26	9104.81	11012.6	14079.4	9306.07	11687	10813.3	11049	8682.81	7977.49	16020.7	23293.9	17974.7	20423.9	14687.5	10283.3	9931.75	7634.28	18896.8	8864.91	8129.88	8513.52	60410	21270.9	22769.9	19506.9	11736.9	12749.3	9736.93	15740.7	16277.6	11155.5	15946.4	8855.88	8090.59	36393	12934.9
PWY-5154	2325.69	9146.41	2582.02	4947.32	10968.3	7395.47	3539.98	8071.47	6094.55	9604.06	1947.34	7779.08	5492.61	3485.44	6299.15	8846.17	4857.33	4380.34	5975.02	5832.46	2908.15	6601.62	11104.6	16140.5	12074.7	11034.2	6163.21	5310.23	5196.66	3533.37	13429.2	5333.56	4563.95	4797.39	38818.8	11956	15597.9	12347.3	7182.03	7030.41	8208.36	8860.68	9768.04	7404.67	9099.16	5146.53	4557.43	24008.7	8673.7
PWY-5177	182.429	1026.74	72.6867	667.879	757.121	397.825	1724.62	244.791	461.573	1528.4	419.106	558.009	58.8264	739.946	68.0232	834.88	334.43	766.806	362.043	324.81	396.496	1198.91	817.037	450.638	644.506	678.605	97.7633	338.826	400.393	404.648	757.656	271.999	677.897	248.497	883.492	1876.88	2031.22	1031.97	523.331	337.616	960.238	1751.11	344.876	97.2757	579.147	452.935	446.858	966.745	218.079
PWY-5180	0	0	158.67	0	204.457	0	52.8526	0	0	0	0	0	0	63.8626	0	0	0	0	0	0	0	0	0	0	21.956	0	0	0	0	0	89.4922	98.3801	129.463	0	0	0	0	0	0	0	898.693	148.15	0	0	0	0	0	223.549	0
PWY-5182	0	0	158.67	0	204.457	0	52.8526	0	0	0	0	0	0	63.8626	0	0	0	0	0	0	0	0	0	0	21.956	0	0	0	0	0	89.4922	98.3801	129.463	0	0	0	0	0	0	0	898.693	148.15	0	0	0	0	0	223.549	0
PWY-5188	880.793	4917.47	3988.84	3701.71	8251.27	5143.42	4252.53	4020.64	3420.18	8760.48	2141.38	6400.63	2730.73	3577.19	3068.96	4212.18	2956.69	4091.22	3721.46	3120.66	4832.33	4437.81	3967.25	5992.22	8404.49	5688.6	5727.68	3238.61	3333	2698.08	5695.74	2734.95	2782.29	2445.06	15372.1	6131.62	7591.75	5221.11	3781.51	2311.83	7177.11	5255.75	3661.25	2528.72	5261.65	3228.88	2818.65	8933.04	3656.48
PWY-5189	850.086	4541.49	3681.12	3504.65	7889.16	4768.32	3991.35	3715.99	3136.61	8192.86	1849.29	5967.27	2473.93	3332.25	2842.16	4004.7	2713.35	3786.21	3444.58	2906.72	4588.23	4985.03	3918.09	5578.7	7899.11	5266.08	5297.8	3023.23	3014.88	2486.35	5292.69	2509.55	2489.22	2220.6	14091.3	5813.69	6974	4734.62	3501	2173.34	6836.07	4811.44	3369.13	2363.53	4856.48	3014.69	2623.48	8247.44	3347.46
PWY-5265	0	0	722.884	0	897.11	0	189.783	855.829	0	1723.14	0	0	0	1563.61	0	0	0	382.323	0	0	0	0	306.777	76.4761	178.937	0	648.469	707.618	0	0	0	0	0	0	377.821	0	0	278.507	0	0	568.197	2628.22	0	434.053	0	0	72.216	1037.24	0
PWY-5304	532	1339.6	2830	982	394	1718	1306	1768	528	6182	82	1878.8	828.8	1160	776	1530	1383.8	1750	1883	674	2650	780	538	2692	7362	1724	1043.6	990	1709	764	10170.5	746.2	787.6	608	5673	1306	3704	1104.8	1073	1032	950	396	3338.35	986	1414	2755	1123.8	13968.2	1164
PWY-5345	847.432	3267.77	3073.41	4366.81	6897.35	1228.79	3864.47	3075.4	3345.39	4189.14	1550.85	3762.59	1366.81	1697.23	1624.83	4283.81	1928.91	2549.31	2515.52	1708.9	1140.31	4335.61	4985.72	3172.79	4334.93	4148.02	2309.3	1387.51	1087.85	1256.07	4369.4	1934.86	2031.81	2105.5	10402.8	4265.93	8694.13	5639.53	2507.47	0	8842.91	4897.99	3278.06	1741.98	3386.57	2182.17	1923.3	5470.8	1813.13
PWY-5347	2042.1	6104.89	5103.3	6095.28	13235.2	5698.47	6309.94	4443	6684.73	9562.37	1606.61	6687.93	3886.44	5081.91	7280.89	6533.2	4544.92	7734.4	5124.04	5011.69	4965.77	6559.02	7507.63	9962.15	6396.89	9628.07	8025.55	5779.8	4380.86	3815.57	8406.47	4123.33	4131.78	3030.75	17537	13964.2	12779	10273.7	6772.11	7396.51	10717.6	11033.2	6767.94	5826.3	12243.9	5559.52	4183.28	15453.5	2385.59
PWY-5384	1154.75	2975.55	3556.93	4141.78	11969.3	3860.71	6011.57	4510.35	4087.49	7765.24	1416.78	4640.07	2022.58	3227.12	2889.17	4395.22	2912.34	4521.02	5351.06	3489.27	2851.7	2054.98	3235.11	6956.44	8470.14	10043.7	3282.69	4007.43	3607.44	1870.35	5361.15	1630.36	2613.84	2309.4	15866.8	4227.78	8392.02	7653.56	2318.63	3253.93	9824.58	7091.23	6394.32	2561.11	3397.39	3345.98	2165.38	7683.2	3474.68
PWY-5415	0	0	75.6186	0	47.5337	0	32.0566	0	0	0	0	0	0	15.7441	0	0	0	0	0	0	0	0	0	0	10.7179	0	0	0	0	0	19.3887	32.4642	60.587	0	0	0	0	0	0	0	610.288	100.756	0	0	0	0	0	20.4669	0
PWY-5484	3986.06	13836	4985.69	7189.88	19433.1	11002.1	7069.51	11406.1	10849.3	15184.5	4103.22	12775.3	5017.92	6073.36	7915.36	12302.7	7470.02	5709.17	9916.94	9869.39	8106.67	4736.18	15180	23508.6	17483.1	16232.7	10868.8	9601.24	7236.72	5917.38	20378.9	7896.84	7574.12	7255.34	58305.8	13911.7	24337.9	19118.7	9515.12	11908.2	12773.5	15522.6	16022.4	10397.3	12895.7	8571.82	7351.32	37288.6	13480.3
PWY-5505	3740.35	9787.47	4341.08	5560.18	13879.2	12810.6	8465.39	9711.59	8878.72	18566.1	2637.56	13485	6116.72	8957.23	10435.4	11542.7	7751.56	11967.7	9151.13	9848.79	7989.99	6533.97	12986.3	17953.1	13959.7	15213.1	14095.9	9865.15	7872.98	7034.91	13442.1	6484.24	4714.46	5692.35	41481.4	17627.4	13432.8	13147.5	9704.84	11908.3	6848.26	11992.2	10912.2	8562.35	14089.2	6926.78	6001.96	27998.6	9873.19
PWY-5507	120.79	1116.93	0	0	0	120.63	243.663	0	0	0	172.771	648.172	0	0	0	479.231	0	0	444.537	0	0	649.417	681.721	249.85	667.934	648.21	0	0	0	0	0	0	0	0	2637.81	265.537	0	0	369.884	0	0	356.269	0	176.563	0	0	0	0	202.608
PWY-5509	2937.77	11259.6	3413.44	5880.46	13041.9	12557.5	8237.25	7965.11	8762.27	14777.8	4532.14	11479	7568.86	7428.03	9346.67	10568.5	7579.24	10145.3	8986.43	9377.83	5865.98	6592.4	12159.9	14472.6	13379.6	18717.1	11365	7537.27	8112.55	6167.46	15900	6913.39	6083.32	6913.17	37812.6	16321.2	16425.9	14666.3	9480.03	9824.51	8502.99	10569.5	13979.8	8592.14	13212.5	6469.63	5810.89	28928.6	10466.1
PWY-5531	60.5183	0	0	0	0	13.4087	37.8563	0	0	0	0	103.864	0	0	0	0	0	0	0	0	0	0	0	0	112.501	0	0	0	0	0	0	0	0	0	73.7018	0	0	0	203.662	0	0	73.6148	0	0	0	0	0	0	0
PWY-5532	0	0	21.8769	0	0	0	98.2331	0	0	33.8944	0	0	0	0	0	0	0	0	0	0	0	0	77.664	14.6825	46.5978	0	0	0	0	0	0	0	0	0	189.971	0	0	0	0	0	184.342	0	0	0	0	11.47	28.5863	146.048	0
PWY-5659	2945.33	12111.7	2707.79	5592.92	15023.4	11057.9	4149.02	11126.8	9109.63	12444.6	4071.08	10664	6708.52	6034.68	7738.33	11366	6371.59	7406.41	7987.21	8259.59	4870.19	6417.09	13835.5	19786.1	12863.6	13336.5	9883.88	8288.3	7594.64	5491.98	15018.6	7116.78	6614.48	6604.34	52404.9	16678.8	20119.2	15547.1	9480.93	10512.6	7799.43	13852.5	12934.3	9310.55	12782.6	7035.43	6200.49	30723.9	10880.6
PWY-5667	4835.65	15281.9	6785.84	9057.37	21078.3	16102.3	11781	14789.5	12512	23860.1	6320.69	18517.9	9489.65	10989	12238.3	15803.9	10675.7	14237.9	12555.1	12736.1	11800.7	10749.4	17770.4	24367.9	20621.7	23785.6	17465.3	12202.9	11382.1	8662.66	20809.1	9852.88	9403.84	9950	64463.8	23467.3	26000.4	21989.5	12858.9	14462.1	15807	18078.8	17357	11627.5	18739.7	9883.38	9417.57	37823.6	14018.2
PWY-5676	1181.78	4942.19	0	847.577	7253.01	4679.25	3940.98	3124.26	2994.42	7938.36	2905.5	5008.95	2781.97	3564.72	1939.97	5214.23	3291.79	3264.22	4997.91	2962.95	922.234	2909.55	5580.68	3267.37	3382.4	5716.13	3033.82	1993.42	3789.25	3203.15	5976.86	2898.91	3488.15	2918.58	13368.4	7792.57	6342.6	7591.52	3265.77	3421.89	5174.96	7376.93	5217.27	2672.4	3719.99	4358.63	3146.08	5912.66	2255.48
PWY-5677	262.608	300.688	75.4015	0	785.216	271.878	473.5	417.416	296.896	1060.86	217.939	635.379	364.28	492.966	423.942	357.514	457.629	131.158	546.188	490.447	117.207	273.107	682.268	304.502	351.084	253.828	129.567	110.213	384.752	306.61	414.271	387.388	263.996	511.989	1142.04	595.386	524.28	791.867	621.556	379.831	549.988	451.663	344.746	497.378	242.23	399.274	375.375	896.991	273.891
PWY-5686	4772.79	15036.9	5605.1	7662.7	20936.4	15966.2	10404.4	14457	11876.5	22710.2	6184.16	17428	9912.38	10476.7	12700.7	15958.5	10457.7	13351.8	11912.4	12052.8	9495.37	10218.2	17694.3	26690.2	19612.9	22819.2	16807.1	11789.9	11380.7	8644.91	21056.7	9769.59	9196.74	9450.41	66915.7	24244	25007	21968.7	13272.5	14242.2	12481.4	18145.8	17833.2	12421.2	18078.5	10020.7	8986.8	40459	13058.3
PWY-5695	3706.16	13890	5300.4	7380.16	19595.6	11629.9	7755.56	12254.3	10500.1	14573.3	3899.01	11760.8	8247.92	6859.46	9292.88	11569.2	7729.56	8215.65	9760.31	9909.71	7463.99	6381.63	16055.6	23542.6	16594	17062.1	10361.3	8969.98	8283.73	5550.41	20761.8	8318.66	7146.73	7674.97	61283.6	16459.1	25784.1	18665.2	10948.7	10843.8	12961.7	13723	15867.4	10702.9	14732.5	8118.52	7446.87	37135.6	13218.5
PWY-5705	126.966	127.967	66.7525	187.134	886.073	171.863	605.943	137.405	169.289	518.139	93.8922	69.5093	199.982	259.01	274.284	569.891	196.251	120.585	329.946	83.2621	202.915	118.107	458.116	307.07	334.132	282.763	296.525	234.302	167.644	173.54	208.498	175.97	244.326	39.0881	770.79	237.482	374.785	289.032	211.738	151.098	1116.69	472.044	156.862	71.6875	231.833	233.529	120.574	960.301	242.972
PWY-5741	52.1671	484.094	0	0	0	9.58383	20.7142	0	0	0	80.841	263.698	0	0	0	291.034	0	0	79.2772	0	0	2109.08	415.153	23.9264	198.899	155.21	0	0	0	0	0	0	0	0	305.978	793.875	0	0	481.66	0	0	169.513	0	39.561	0	0	0	0	42.4439
PWY-5747	34	0	51.5118	0	37.3587	7.60985	39.6194	0	0	0	0	70.5524	0	9.18963	0	39.1151	0	0	0	0	0	27.2333	284.501	0	95.0266	0	0	0	0	0	11.009	17.7442	78.74	0	47.2792	0	0	0	117.949	0	752.155	202.545	0	25	0	0	7.71254	16.2108	0
PWY-5837	127.511	542.463	1618.07	2631.14	886.269	255.828	1734.95	220.835	1826.6	538.871	630.199	429.623	174.965	381.894	572.461	197.148	173.003	774.893	104.989	397.858	309.016	258.857	169.358	399.1	681.619	89.3842	391.044	545.651	186.642	60.6041	215.897	589.127	473.361	142.53	60.5795	379.871	3772.76	915.391	31.1408	0	5053	1462.38	403.912	82.8594	1878.56	24.6736	447.991	2193.11	68.6133
PWY-5838	369.183	1542.22	1821.33	3239.69	2388.89	777.253	2257.34	694.849	3235.12	1522.06	1051.93	1230.96	542.434	936.89	1471.83	625.589	529.988	1546.26	338.083	1094.06	883.296	694.052	552.029	1271.5	1980.33	298.089	1081.15	1376.47	571.226	195.118	708.594	1485.01	1212.78	442.053	206.731	1154.07	8155.42	2530.49	105.247	0	5812.38	3084.02	1240.03	273.639	3762.59	83.3857	1155.27	6045.52	229.034
PWY-5840	370.75	1544.26	1855.41	3221.49	2403.24	780.632	2321	695.423	3260.56	1532.86	1082.72	1237.85	543.285	949.111	1480.34	626.42	531.734	1576.89	338.776	1100.66	886.122	694.342	551.994	1270.37	1979.54	298.306	1090.95	1387.31	573.838	195.624	708.343	1492.22	1222.8	443.282	206.726	1157.94	8016.07	2537.86	105.258	0	5730.64	3121.57	1240.29	273.703	3789.71	83.4068	1161.53	6024.17	229.066
PWY-5845	226.197	424.77	1807.46	3094.74	1974.77	577.635	2124.2	197.27	585.037	1180.85	757.317	99.6617	369.362	771.37	0	449.779	415.166	1330.13	233.729	524.182	711.189	403.502	0	793.893	802.681	0	494.109	719.774	365.495	0	543.423	503.161	999.756	344.39	155.319	335.41	6847.95	2058.78	47.2309	0	5688.72	2420.27	362.014	208.19	968.245	62.9516	560.23	1946.12	173.484
PWY-5850	226.197	424.77	1807.46	3094.74	1974.77	577.635	2124.2	197.27	585.037	1180.85	757.317	99.6617	369.362	771.37	0	449.779	415.166	1330.13	233.729	524.182	711.189	403.502	0	793.893	802.681	0	494.109	719.774	365.495	0	543.423	503.161	999.756	344.39	155.319	335.41	6847.95	2058.78	47.2309	0	5688.72	2420.27	362.014	208.19	968.245	62.9516	560.23	1946.12	173.484
PWY-5855	207.478	1350.31	1754.39	2206.37	3722.59	304.085	1504.26	0	211.952	965.393	300.5	890.831	193.949	501.856	48.2824	974.154	200.488	692.106	246.392	447.227	265.718	3658.9	1426.53	343.44	1494.82	900.724	239.36	185.544	130.917	91.2017	1039.95	429.061	519.587	559.748	997.846	1711.01	3524.37	967.337	1022.84	85.3441	4988.98	1173.09	266.273	197.093	120.893	367.388	257.464	1448.17	295.233
PWY-5856	207.478	1350.31	1754.39	2206.37	3722.59	304.085	1504.26	0	211.952	965.393	300.5	890.831	193.949	501.856	48.2824	974.154	200.488	692.106	246.392	447.227	265.718	3658.9	1426.53	343.44	1494.82	900.724	239.36	185.544	130.917	91.2017	1039.95	429.061	519.587	559.748	997.846	1711.01	3524.37	967.337	1022.84	85.3441	4988.98	1173.09	266.273	197.093	120.893	367.388	257.464	1448.17	295.233
PWY-5857	207.478	1350.31	1754.39	2206.37	3722.59	304.085	1504.26	0	211.952	965.393	300.5	890.831	193.949	501.856	48.2824	974.154	200.488	692.106	246.392	447.227	265.718	3658.9	1426.53	343.44	1494.82	900.724	239.36	185.544	130.917	91.2017	1039.95	429.061	519.587	559.748	997.846	1711.01	3524.37	967.337	1022.84	85.3441	4988.98	1173.09	266.273	197.093	120.893	367.388	257.464	1448.17	295.233
PWY-5860	157.809	289.176	1730.51	2885.57	1418.78	401.137	1909.72	132.874	407.803	840.51	600.133	66.8444	253.878	575.418	0	307.371	288.27	1055.57	159.084	365.957	505.223	278.089	0	540.387	551.418	0	342.612	511.352	252.336	0	368.865	350.652	731.566	237.092	103.708	226.852	5342.27	1481.46	31.5788	0	5336.82	1852.86	245.06	140.628	680.847	42.2091	395.472	1341.98	116.756
PWY-5861	265.364	1111.85	1749.66	3078.19	1744.72	547.648	2074.73	480.558	2841.82	1104.98	899.63	886.715	378.335	717.198	1115.17	431.749	372.272	1266.26	232.283	805.158	637.606	490.259	376.529	876.568	1424.06	201.28	787.155	1040.2	402.434	133.516	483.651	1135.38	906.295	307.173	138.108	809.211	6575.95	1854.62	70.6209	0	5501.52	2461.13	871.984	185.609	3142.42	56.0148	869.907	4493.97	154.613
PWY-5862	157.809	289.176	1730.51	2885.57	1418.78	401.137	1909.72	132.874	407.803	840.51	600.133	66.8444	253.878	575.418	0	307.371	288.27	1055.57	159.084	365.957	505.223	278.089	0	540.387	551.418	0	342.612	511.352	252.336	0	368.865	350.652	731.566	237.092	103.708	226.852	5342.27	1481.46	31.5788	0	5336.82	1852.86	245.06	140.628	680.847	42.2091	395.472	1341.98	116.756
PWY-5863	145.049	616.142	1730.53	2792.91	1005.22	291.585	1920.98	251.736	2034.85	613.305	708.099	488.873	199.369	433.68	648.959	224.825	197.163	876.443	119.809	452.131	350.886	293.888	193.233	454.942	774.207	102.084	445.089	618.69	212.705	69.1794	246.306	666.523	536.184	162.473	69.2233	432.921	4198.58	1038.75	35.5745	0	5213.07	1647.81	459.857	94.5895	2108.3	28.1862	507.605	2483.27	78.35
PWY-5896	226.197	424.77	1807.46	3094.74	1974.77	577.635	2124.2	197.27	585.037	1180.85	757.317	99.6617	369.362	771.37	0	449.779	415.166	1330.13	233.729	524.182	711.189	403.502	0	793.893	802.681	0	494.109	719.774	365.495	0	543.423	503.161	999.756	344.39	155.319	335.41	6847.95	2058.78	47.2309	0	5688.72	2420.27	362.014	208.19	968.245	62.9516	560.23	1946.12	173.484
PWY-5897	332.554	1391.75	1820.38	3199.51	2179.66	694.725	2229.99	617.219	3099.03	1376.24	1021.27	1110.46	483.095	864.69	1348.22	554.861	473	1463.92	299.192	992.855	796.89	628.316	487.305	1126.78	1781.9	262.122	981.079	1265.14	510.344	172.669	625.049	1365.51	1114.65	393.723	181.041	1030.74	7651.96	2296.63	92.3252	0	5784.61	2902.32	1106.22	241.036	3554.45	73.1588	1058.54	5489.45	201.361
PWY-5898	332.554	1391.75	1820.38	3199.51	2179.66	694.725	2229.99	617.219	3099.03	1376.24	1021.27	1110.46	483.095	864.69	1348.22	554.861	473	1463.92	299.192	992.855	796.89	628.316	487.305	1126.78	1781.9	262.122	981.079	1265.14	510.344	172.669	625.049	1365.51	1114.65	393.723	181.041	1030.74	7651.96	2296.63	92.3252	0	5784.61	2902.32	1106.22	241.036	3554.45	73.1588	1058.54	5489.45	201.361
PWY-5899	332.554	1391.75	1820.38	3199.51	2179.66	694.725	2229.99	617.219	3099.03	1376.24	1021.27	1110.46	483.095	864.69	1348.22	554.861	473	1463.92	299.192	992.855	796.89	628.316	487.305	1126.78	1781.9	262.122	981.079	1265.14	510.344	172.669	625.049	1365.51	1114.65	393.723	181.041	1030.74	7651.96	2296.63	92.3252	0	5784.61	2902.32	1106.22	241.036	3554.45	73.1588	1058.54	5489.45	201.361
PWY-5910	0	21.2084	201.528	103.529	203.812	108.753	53.1233	97.3293	174.407	130.413	0	0	0	170.007	24.872	17.2123	65.4686	22.0552	49.3109	7.90851	44.9193	81.8414	44.5084	0	10.5999	92.0081	44.4286	561.405	0	66.5366	86.9554	138.009	58.932	13.9084	26.9476	32.6002	31.5255	569.829	0	34.0719	922.997	677.118	44.7413	47.5229	805.801	0	12.5987	451.5	18.1614
PWY-5913	2245.62	4958.64	2733.25	5291.07	5244.85	1932.43	4204.88	1548.66	4022.3	3521.07	1826.2	8066.35	978.444	1589.93	1894.69	4215.85	2227.18	2271.68	3083.21	3624.78	5788.9	6445.42	3802.29	4945.62	7620.15	4767.48	2219.37	1850.04	4360.46	678.628	16683.2	2470.56	3774.2	3561.04	11596.5	7306.27	19650.9	6668.29	2896.83	6131.79	8637.22	9443.8	7956.18	1603	3926.52	5009	3023	26401.9	3864.39
PWY-5918	358.583	1153.71	2493.83	2740.88	1265.41	175.407	2329.67	813.789	1441.29	857.879	238.683	490.894	405.123	665.813	566.851	582.482	634.277	1113.25	113.871	295.883	750.159	2781.77	507.525	377.405	654.316	298.704	659.614	421.059	229.182	0	429.78	674.969	604.419	395.783	3382.18	1510.62	4067.6	976.507	1775.11	104.743	5898.3	1476.05	1043.39	447.207	1336.59	179.173	308.599	2547.56	509.33
PWY-5920	106.664	841.741	43.3978	317.83	421.898	59.5617	1029.92	0	106.059	288.041	129.082	333.386	0	358.696	0	405.675	125.828	267.881	74.8543	153.547	386.764	2577.78	355.417	175.68	404.513	204.988	0	241.372	83.8584	0	88.1996	134.629	153.861	165.976	912.447	1125.57	1253.66	548.122	1101.13	0	1150.5	353.829	137.829	85.5667	187.149	81.1854	146.411	507.237	102.001
PWY-5971	1976.02	12653.9	3272.28	6493.19	8814.42	9615.97	2481.82	4297.09	7633.49	9208.64	0	4730.79	2155.69	3291.13	1978.96	8937.5	4302.6	5022.36	5715.22	8872.96	2452.28	3897.88	10012.4	8090.65	10619.9	14564.7	7802.19	4796.37	3939	4298.55	21467	6785.79	3088.94	4180.9	9551.57	9664.37	10303.7	13948.9	7191.36	8888.25	8853.3	8000.69	16428.3	5672.16	14344.8	2352.23	3909.23	34183	7305.03
PWY-5973	5083.13	17534	5942.91	9515.01	20685.8	17280.7	10894.4	16691.4	14250.7	23038.6	6311.86	18112.2	10464	10414.5	13073.7	16847.7	11071.7	13844.2	12846.8	13602.5	11528.7	10831.8	19729.8	28667.1	21976	24674	17040.3	12312	11965.1	9181.42	24755	11005.6	9581.63	10324.9	75456	25328.1	29633.6	24403.9	14463.7	15143.1	14098.2	19055	20569.2	13479	19845.6	10528.8	9728	50364.6	15808.1
PWY-5989	1746.85	14755.9	2985.77	7274.31	12580.4	8974.82	3295.31	3991.33	10466.5	7697.33	2373.58	3679.09	1596.64	2576.06	7460.66	10461.2	3841.45	3674.32	7257.46	9364.97	3933.49	2849.6	14090.2	8518.68	16982.8	14962.9	6301.65	3705.45	6147.88	3983.74	26775.2	6856.47	5073.97	3924.42	13339.5	7672.98	21413.4	14502.3	6445.82	7231.57	7941.36	6316.08	17773.7	5161.65	12539.9	6291.75	5180.32	53425.5	12159.1
PWY-6071	0	0	141.886	0	34.8896	0	27.7622	0	0	56.7575	0	0	0	94.5102	0	0	0	53.8469	0	0	0	0	0	0	18.3593	0	0	0	0	0	36.6786	24.6505	95.3247	0	0	0	0	62.0801	0	0	953.094	117.719	0	0	0	0	10.0563	141.852	0
PWY-6121	4609.72	15575.9	5255.3	7583.56	19772.5	15248.1	9617.78	14130.6	11996.3	20985.3	5873.99	16473.8	9322.7	9710.65	11626.6	15236.5	10028.5	12087.8	11630.8	11911.5	9679.39	9923.1	17532.8	26343.6	19393.4	22023.7	15482	11432.4	10855.1	8148.08	21721.5	9748.16	8801.24	9159.63	67684.3	23184	25695	21417.9	12878.7	13607.6	12090.4	17488	17730.9	12260.8	17283.6	9727.96	8736.39	41223.9	14006.6
PWY-6122	4489.01	15060.7	5055.31	7156.96	19329.7	15014.7	9405.13	13686.1	11591.6	20723.3	5813.21	16286.1	9328.69	9692.38	11394.7	14914.6	9850.35	12053.3	11333.3	11538.1	9572.62	10101	16943.6	25064.2	18619.1	21499.6	15342.7	11066.3	10699.5	7993.09	20787.3	9399.18	8558.12	8967.63	64527	23039.4	24536.4	20724.7	12547.1	13176.2	11409	17040.3	16932.3	11747.5	16928.3	9482.53	8512.88	39120.2	13452.3
PWY-6123	4296	14542.4	4759.85	7010.51	18039.6	14598.3	8861.96	13611.9	11310.4	20050	5536.97	15401.4	9272.23	9351.24	11309.8	14168.4	9578.78	11630.3	10944.9	11229.9	9176.51	8665.43	16594	25257.6	18324.4	20960.5	14498.1	10886.1	10248.7	7544.31	20180.9	9189.13	8349.86	8630.37	64545.4	21772.4	24576.9	20120.7	12205.5	12959.3	11080.1	16193.3	16843.8	11731.6	16733.9	9058.47	8338.2	38533.4	13391.3
PWY-6125	2214.24	10609.2	3541.44	6073.65	6709.2	8363.8	4669.16	8322.07	8098.04	8890.24	2619.79	8014.91	5909.35	4678.36	7061.29	9758.23	4881.9	5032.69	5934.36	6881.99	6749.9	6656.88	9984.66	18895	13519.1	12199.9	5488.3	7104.44	6164.75	3246.26	16082.2	4970.24	4931.99	4738.29	39604.5	12019	19436.4	11957.6	7387.47	8058.71	10272.7	9815.32	12221.7	5236.43	11527	5278.02	5164.47	32490	8897.74
PWY-6126	4646.53	16295.8	5892.41	8419.9	21313	16232.9	10593.1	14417.8	13065.1	20421.5	6268.34	16285.9	9375.45	9652.26	12299.6	16435.9	10328.3	11794.6	12426.4	12660.5	10320.4	9842.64	18208.7	25903.4	20962	23702.3	15026	11771.8	11525.6	8406.76	23476	10093.1	9489.44	9811.79	66600.9	22985.8	27171.5	22364.2	13090.2	13944.1	13760.7	18348.6	19349.5	12192.3	18279.9	10236.9	9366.45	43644.2	14794.2
PWY-6147	2879.7	10264.9	4260.58	5837.22	12290.7	9057.34	5443.12	9229.55	7439.88	10456.4	2389.86	10352	6652.66	5668.47	7114.96	9283.57	6356.55	6888.82	7117.8	6991.98	5625.38	6436.69	12036.2	17884.2	11703	12320.3	9212.94	7893.2	6112.35	4380.41	15442.5	5876.56	4865.75	4952.34	46063	13508.3	19848.3	14286.3	8598.12	8600.76	8433.07	9835.54	11614.8	7792.18	12079.7	5848.36	4764.88	28440.4	10097.5
PWY-6151	3033.52	10398.1	4938.17	6222.92	11269.9	11959.4	7889	11411.7	9387.37	14357.4	3446.24	10798.8	7029.27	6949.89	9109.38	10175.4	7145.66	9823.49	8816.41	9061.94	7092.21	5355.88	11427.8	20697.8	14517.2	17308.1	10928.3	9684.84	7703.63	5885.14	11473.2	6532.77	5400.89	5603.72	52652.1	13668.5	15531	14957.2	9345.61	9648.79	9927.54	10771.1	12019	9734.11	13211.9	6518.99	5598.51	28757.3	9479.49
PWY-6163	4455.54	14629.9	5910.19	7396.01	18567.9	15202.2	9756.13	13701.8	11232.6	21147.2	5620.98	16320.8	9114.82	9764.27	11684.6	14632.4	9790.65	12604	11192.3	11781.9	9934.32	9227.53	16737.6	24417.5	18189.5	20796	15802.2	11334.5	10448	8168.12	20262.9	9269.07	8452.95	8893.07	62049	22176.9	24039.5	20582.6	12318.8	13136.3	11974.3	16543.3	16401.8	11285.3	17221	9231.81	8625.75	39848.8	13155.9
PWY-6165	0	0	0	0	241.659	0	0	0	100.455	0	0	0	0	0	0	113.124	0	0	0	0	0	0	0	0	103.63	0	0	0	0	0	0	0	0	0	0	0	0	0	0	0	103.439	0	0	0	0	0	0	0	0
PWY-621	3350.66	9389.19	8861.22	8268.99	22320.6	12401.6	10467.4	10741.3	9489.87	16649.3	2829.71	12897.5	5703.38	7833.31	8209.1	11406.3	8364.19	10521.8	10690	9485.37	7365.18	6687.77	11670.4	16707.9	15153.2	17827.6	12642.2	11525.3	9188.02	6908.93	20062.7	6973.9	6001.69	5827.13	47006	15576	18935.4	16374.1	8411.69	10872.6	15829.6	11301.1	13314.3	10316.1	12517.2	8720.53	5642.46	35068.8	9367.77
PWY-6263	603.26	1906.83	0	0	5571.97	773.815	441.489	2476.78	1108.23	3947.38	436.96	2818.66	897.304	1225.31	903.976	3586.19	1414.36	787.564	1489.99	832.559	277.211	992.861	3791.28	2010.43	3128.13	2232.08	2101.15	188.858	705.577	1066.99	3254.52	1381.79	1530.76	1918.6	8323.23	1812.49	4583.34	4283.11	1235.36	0	179.36	1552.87	1979.05	1326.77	1126.87	1627.4	1698.54	2023.28	1986.34
PWY-6269	2948.74	11308.4	3464.03	5929.4	13142.8	12594.1	8319.13	8022.59	8836.92	14848.7	4571.08	11541.5	7586.99	7459.7	9376.23	10620.2	7604.34	10168.4	9034.49	9418.71	5898.56	6629.86	12214.7	14574.1	13450.9	18813.2	11406.4	7583.07	8143.27	6211.61	15951.7	6940.19	6115.85	6941.39	38053.1	16398.2	16614.7	14740.7	9507.87	9865.3	8645.74	10626.7	14029	8619.48	13247.6	6498.9	5834.24	29006.5	10507.4
PWY-6277	4489.01	15060.7	5055.31	7156.96	19329.7	15014.7	9405.13	13686.1	11591.6	20723.3	5813.21	16286.1	9328.69	9692.38	11394.7	14914.6	9850.35	12053.3	11333.3	11538.1	9572.62	10101	16943.6	25064.2	18619.1	21499.6	15342.7	11066.3	10699.5	7993.09	20787.3	9399.18	8558.12	8967.63	64527	23039.4	24536.4	20724.7	12547.1	13176.2	11409	17040.3	16932.3	11747.5	16928.3	9482.53	8512.88	39120.2	13452.3
PWY-6282	1736.71	14527.6	3129.46	7344.04	12467.3	9047.82	3394.06	3965.18	10437.4	7738.53	2444.46	3680.73	1592.68	2595.39	7420.06	10376.5	3838.31	3722.79	7237.45	9346.31	3919.23	2844.71	13764.1	8402.54	16647.2	14959.2	6362.53	3690.41	6147.1	4022.25	25975.9	6821.87	5071.36	3928.27	13239.3	7655.09	20826.4	14316.8	6372.35	7164.92	8025.39	6339.77	17408.2	5092.95	12499.3	6190.8	5157.4	52055.6	11881.6
PWY-6317	3595.77	10843.4	5715.7	7212.98	18237.8	13377.1	9029.29	11702.9	11187.4	17306.2	3991.4	13843.6	6736.76	8030.99	9739.28	12955.5	7894.63	10851.2	10573.5	10601.9	7773.09	6302.44	12351.6	20755.6	16186.6	19479.7	13290.7	10901.1	9076.35	7061.8	16456	7443.52	6689.77	7094.48	49787.8	17651.1	17775.6	16910.7	9679.3	11577.9	11953.6	13561.9	13895.7	9416.32	14752.9	8376.26	7053.17	33036.1	9802.64
PWY-6353	2035.56	4721.8	3491.34	1542.9	11079.9	6063.94	3097.02	4332.31	3289.03	9800.06	1879.34	5210.9	2990.59	3925.64	3386.64	5540.8	4122.94	3784.62	4036.78	4489.7	2092.25	3194.24	5683.96	4428.52	5097.85	5599.66	4861.78	3069.94	3867.11	3469.95	5979.26	3452.28	3521.58	4205.91	19321.2	7005.27	6941.47	6915.2	4266.7	3230.26	8917.63	6660.98	4418.34	3105.21	4149.38	3457.09	3658.2	12672	4208.9
PWY-6385	4159.73	13672.6	5033.63	6844.52	17909	14189.7	9178.75	12994.4	10920.9	19961.1	5555.08	15160.5	8764.41	9237.8	10865.5	13769.7	9309.23	11629.6	10704.4	10863.5	9068.11	8253.01	15764.2	23107.8	17232.2	20354	14613.9	10485.1	10061.4	7530.64	18816.4	8881.41	8236.26	8476.62	59988.7	21162.8	23054.1	19458.5	11507.7	12420.8	11352.9	15754.7	15732.7	10996.7	16136.9	8753.25	8118.67	35434.1	12583.3
PWY-6386	4235.79	13869.7	5076.51	6880.4	18246.3	14526.3	9312.14	13238.2	11030	20417.1	5665.5	15433	8935.14	9486.68	11077.4	13992.8	9498.25	11858.9	10916.8	11092	9229.65	8366.15	16000.9	23416.8	17420.8	20771.9	14951.9	10641	10246.2	7664.53	19081.5	9084.49	8405.99	8639.94	60633.1	21615.7	23279	19831.8	11691.3	12651.4	11422.2	16077.1	16005.7	11161.5	16448.2	8938	8248.65	35968.6	12826.8
PWY-6387	4207.21	13877.9	5112.28	6919.79	18267.3	14359.9	9295.7	13133.7	11079	20180.8	5658.78	15366.7	8842.16	9379.74	10979.8	13995.4	9407.85	11767.3	10835.3	10963.9	9141.23	8732.78	15997.3	23270.1	17417.8	20565.5	14819.3	10584.5	10182.3	7629.54	18953.9	8991.1	8342.43	8608.85	60538.5	21528.3	23251.5	19654.1	11702.2	12535.8	11584.9	16008.1	15854.6	11107.7	16299.1	8877.35	8218.92	35802.6	12700.4
PWY-6396	0	22.2914	188.723	68.3186	280.619	41.0602	69.1547	133.149	160.328	11.8403	0	0	0	97.554	20.9027	17.1775	48.2472	14.0155	79.571	0	26.054	28.0268	25.4643	0	10.4739	117.353	85.5484	379.995	0	105.385	104.85	108.884	103.929	13.6	159.71	33.0478	29.9174	302.424	0	21.6623	663.57	561.246	144.028	0	366.205	0	25.4151	397.651	18.0434
PWY-6467	1534.82	6341.71	1644.07	3520.9	6315.71	4280.45	2268.16	5522.12	4543.79	5533.85	1189.32	5118.65	3739.64	2120.2	4012.12	5534.6	3158.1	2443.52	3511.59	3833.36	3611.78	4148.97	7763.08	12331.5	8566.3	7185.7	3469.62	3351.22	2997.86	1985.12	9649.52	3619.48	2822.59	3111.23	30190.9	7337.45	14190.3	8198.15	5307.1	4400.71	5615.46	5204.85	7587.17	5027.35	6329.07	3523.31	3123.68	18692.1	5852.86
PWY-6470	0	108.978	524.425	376.78	1229.36	505.634	246.752	443.521	847.858	766.962	0	0	0	709.223	116.658	463.097	303.122	104.234	365.292	38.1253	206.117	372.513	464.491	76.1038	216.146	442.89	214.341	1914.04	0	322.279	413.188	588.675	268.896	66.0074	128.869	159.399	148.686	2437.83	0	163.228	2763.07	2602.4	216.427	223.802	2454.33	0	59.7779	2491.05	86.839
PWY-6471	1397.96	4414.03	907.471	1231.47	7840.49	5183.18	5607.83	6000.77	5831.43	7196.81	2813.6	5985.01	3152.15	4002.56	2787.16	6003.55	3546.04	4509.49	6111.95	4784.25	3061.04	2510.65	4844.84	7311.37	5331.17	11605	3625.74	4640.04	4173	3040.64	7613.82	2709.77	3581.88	3275.18	19989.6	5854.76	6460.31	8838.88	2783.01	5132.16	5843.63	6477.62	7776.48	3354.65	4694.53	4198.14	3224.8	9695.63	2396.2
PWY-6478	535.283	1417.22	30.5149	741.626	2413.22	1913.82	1076.97	400.477	978.583	3127.68	272.069	1866.26	461.883	1333.25	1673.56	2257.26	965.66	1388.41	1038.35	1990.55	2047.31	1890.35	2321.8	2211.62	1775.64	2177.04	2125.53	849.044	1781.77	851.732	7129.42	1332.64	1029.01	1204.06	3700.32	1592.54	4336.46	846.822	1459.55	1602.31	1131.1	1399.48	2697.29	1065.86	1884.85	2036.73	1062.71	10356.6	1484.2
PWY-6507	2557.57	11234.4	891.618	5138.41	12349.1	10108.7	4359.29	6395.75	7082.83	9511.25	2198.21	7574.82	5340.05	4362.19	8786.87	9667.55	5377.98	6120.44	7306.68	9084.52	4809.07	4136.81	12651.2	18897.2	12272.6	13668.1	8221.48	6219.03	5914.19	4925.73	14363.4	6246.54	5201.3	4339.34	41761.6	12158.4	16627.6	13423.1	8280.07	11843.2	5706.13	12912.2	13111.8	8975.39	11592.4	6261.78	4664.63	33346.1	11069.9
PWY-6519	1826.08	10931.6	2714.99	6349.61	9588.9	8452.6	3203.14	5137.34	8032.96	7329	1910.32	4413.34	2389.75	2665.82	7001.22	8640.95	4161.48	3738.04	6309.71	7448.13	3440.32	3372.08	11981.1	11489.1	14177.2	13225.7	5126.42	4503.62	5869.67	3631.1	21464.8	6306.96	4618.07	3759.9	19615.1	8884.12	20199.8	12883.9	6434.43	7428.61	8054.4	7199.7	14699.2	6162.48	11593.9	5753.84	4604.05	42654.6	10325.1
PWY-6545	1162.92	4553.48	2050.47	1192.83	4022.55	4481.45	2927.39	5258.12	4820	5463.22	1747.06	4675.03	3005.65	2947.61	2842.12	4573.55	2491.29	3226.54	3611.88	3888.44	2329.53	3118.27	5096.08	5963.07	4525.46	7748.26	3380.03	3086.48	3550.7	1979.53	6918.71	2791.71	3038.08	2863.08	19873.3	7633.86	6291.57	6670.83	3725.76	4965.66	3708.12	5936.9	6584.25	2878.81	5761.34	3113.3	2733.86	12123.7	3947.42
PWY-6572	1589.17	1227.67	77.8356	748.831	2929.82	2269.18	1029.9	585.954	1739.87	2158.58	252.949	2802.45	542.135	416.545	1131.77	2984.59	1939.91	424.98	2801.55	1332.15	1069.47	1388.04	3628.71	2058.36	3167.04	2741.31	1579.51	344.826	3371.02	1383.86	15201.6	2749.58	1765.2	1483.19	12488.7	3059.51	10183.5	3517.07	1020.91	4389.11	2116.89	5324.51	6302.01	3756.26	1760.08	3213.77	949.321	22260.8	2372.63
PWY-6588	1573.21	5334.13	1539.69	553.018	4971.59	5335.46	2502.18	2489.06	1953.15	8986.68	3860.82	4947.65	3484.64	3836.14	1984.13	4375.64	4124.92	2926.17	3743.66	2270.43	719.403	2080.52	4543.11	1932.32	2242.6	4148.31	3712.09	1642.66	3817.32	3157.54	4951.84	3747.38	4343.21	3332.36	12735.6	9140.31	5781.79	7724.75	3042.74	2399.04	3521.58	7803.69	4126.17	2780.95	3457.19	3766.26	3599.03	5672.31	3277.83
PWY-6590	412.449	2732.99	1049.79	2712.62	4706.8	908.091	2639.16	544.185	968.206	2936.13	824.566	1286.39	132.042	1386.66	152.231	2199.84	733.896	2309.06	1430.42	773.914	1056	2805.15	1962.06	1198.76	2053.83	1730.19	219.497	846.232	951.235	1045.56	2135.35	594.589	1492.81	564.538	2163.28	3853.34	7934.01	2656.22	1865.71	835.175	4028.84	3730.6	784.804	218.516	1241.38	1158.5	955.591	2277.2	500.71
PWY-6608	1778.78	4775.6	3645.08	1823.85	14889	6194.71	3403.3	3524.99	2926.66	8250.99	2115.96	4398.39	2609.52	3423.33	2780.49	5554.8	3961.96	2982.63	3312.5	4565.4	2067.26	2978.01	6023.16	4047.08	3336.5	4872.45	4009.33	3634.48	3504.56	3337.88	5046.77	3444.27	3883.9	4953.26	15690.4	6524.53	5331.75	6603.45	4417.93	3556.04	8266.67	7291.24	3481.34	2450.26	3294.58	3715.34	3962.6	11688.9	3462.28
PWY-6609	4169.94	13355.4	5045.71	6758.33	19552.8	14725	9288.45	12824.9	10671.5	19607.3	5437.18	14809.3	8779.75	9392.93	10503.5	13932.6	9485.39	11663	10967.2	11149.4	6963.54	6691.86	15281.6	23070.8	16234.1	20917	14356.3	11027.7	10217.1	7730.84	18710.7	8964.76	8317.18	8861.4	61241	20238.9	23071.2	19779.1	11225.7	12545.5	11750.7	15982.6	16235.5	11194.2	15828.1	8662.16	8240.36	34833.4	12215.7
PWY-6612	2991.26	10497.3	4793.88	6400.74	12663.6	9719.72	6133	9565.45	7728.93	11552.7	2814.18	10412.4	6736.17	5853.32	7538.71	10081.6	6692.59	6998.62	7346.27	7110.76	5156.37	5609.49	12003	18564.6	12728.6	12931.4	9144.7	8239.07	6713.12	4848.79	15680.1	6249.35	5373.81	5287.61	47099	13952	20202.1	14898.3	8758.6	8770.7	9953.96	11028.1	12038	8333.54	12352.1	6223.05	5285.08	29207.9	10115.9
PWY-6628	1814	3610.55	4665.83	5956.56	5840.96	2869.76	6803.99	5219.78	6513.56	11745.8	1348.22	5188.14	1031.98	5849.11	4440.79	1319.44	2700.01	5286.26	2854.07	3869.2	7554.76	1286.31	6281.01	4824.3	7974.44	7359.52	4881.97	3587.51	3941.34	2044.15	6814.09	2244.86	2724.13	2561.13	13409.3	3057.3	13072.4	4854.7	3127.71	3614.36	10751.3	6662.48	3631.02	3034.53	6230.06	3078.04	3184.34	8070.24	3675.16
PWY-6629	831.61	158.276	4459.66	5749.57	3664.8	454.43	5444.43	0	326.483	3814.17	624.766	15.9442	584.074	1677.51	2364.61	289.998	427.767	3469.23	1292.43	759.713	1476.34	533.571	4940.81	2869.21	879.279	0	2491.51	1085.12	1719.12	0	940.418	912.86	2319.6	653.282	2850.73	1093.26	12144.5	2328.93	2306.16	1896.28	9981.5	4284.52	1332.3	493.631	2257.34	126.246	1239.19	778.723	346.561
PWY-6630	1806.42	3607.77	4646.35	5953.49	5833.4	2862.4	6791.92	5196.04	6503.85	11699.8	1347.49	5172.51	1025.61	5789.08	4416.14	1318.77	2688.65	5257.2	2852.84	3862.81	7415.09	1286.1	6271.93	4820.15	7951.39	7332.22	4874.75	3585.35	3924.5	2043.62	6802.5	2242.54	2721.58	2552.45	13387.6	3050.89	12927.9	4846.88	3110.83	3609.47	10691.3	6658.49	3625.34	3029.09	6188.32	3074.1	3174.31	8063.19	3669.03
PWY-6690	0	0	42.5455	0	22.9091	0	18.5455	0	0	0	0	0	0	7.63636	0	0	0	0	0	0	0	0	0	0	12	0	0	0	0	0	9.27273	16.3636	72.5455	0	0	0	0	0	0	0	646.909	81.8182	0	0	0	0	6.54545	9.27273	0
PWY-6700	2219.42	9392.08	3625.93	5400.38	8340.46	8470.76	4174.36	8244.25	7000.73	8983.75	2108.9	7890.5	6159.65	4514.31	7305.87	7418.6	5341.37	6120.25	5790.39	6449.45	6045.94	6306.07	9435.76	18041.5	11200.5	11782.5	6957.29	6795.06	5955.44	3280.46	17346.5	5546.76	4354.94	4248.34	42440.9	14068.3	18730.6	11520.3	8091.8	8455.09	8371.62	8597.33	12155.2	7543.87	11921.7	5619.88	4331.86	32200.5	7878.44
PWY-6703	1877.68	7913.83	3074.57	4633.84	6506.51	6726.29	3672.83	7058.89	6051.8	7654.69	1750.45	6840.66	5255.74	3936.2	6310.91	5982.8	4249.98	5576.44	4952.97	5786.99	4729.19	4417.04	9094.37	14896.3	9045.23	10006.6	6204.8	5762.93	4435.04	2952.24	11961.9	4481.38	3508.25	3599.24	35910.6	11793.3	15277.3	9773.55	6641.32	7585.34	7239.06	7208.71	9412.67	6484.99	10224	4374.56	3561.5	21910.6	7915
PWY-6708	207.478	1350.31	1754.39	2206.37	3722.59	304.085	1504.26	0	211.952	965.393	300.5	890.831	193.949	501.856	48.2824	974.154	200.488	692.106	246.392	447.227	265.718	3658.9	1426.53	343.44	1494.82	900.724	239.36	185.544	130.917	91.2017	1039.95	429.061	519.587	559.748	997.846	1711.01	3524.37	967.337	1022.84	85.3441	4988.98	1173.09	266.273	197.093	120.893	367.388	257.464	1448.17	295.233
PWY-6728	106.31	173.485	0	0	0	37.5248	92.4597	0	0	0	172.126	391.181	0	0	0	444.705	0	0	145.496	0	0	607.866	710.832	81.6611	384.364	0	0	0	0	0	0	0	0	0	0	345.336	0	0	0	0	0	493.083	0	0	0	0	0	0	98.9086
PWY-6737	5427.23	19699.7	6350.69	9498.7	23207.4	18771.3	11447.7	17125.4	15920.9	24745.1	6130.12	18644.1	10648.3	11101	13762.4	18556.5	11870.9	14306.7	14911.7	16675.9	10679.7	9791.29	20879.6	32698.9	27036.4	29619.5	17211.8	13985.5	13718.6	10005.9	31256.9	12209.4	9937.06	10043.3	77515.8	25844.8	30937.3	26901.8	14642.2	17661.5	13935	20025.4	26213.1	15093.8	20166.6	12639.4	10187.5	66385.4	16732.6
PWY-6749	455.046	3686.13	124.472	263.752	3313.82	1981.31	1914.33	5274.51	2810.51	3319.41	782.684	3032.6	1159.53	1126.2	1211.97	1548.81	1048.76	1299.73	2848.8	4059	445.456	822.96	3877.98	11155	1902.27	6426.53	1049.81	4418.16	1616.21	1673.46	3920.98	1974.41	1518.79	1505.01	23918.3	3356.52	4085.08	4817.21	2391.06	4064.65	1919.79	3205.09	4806.08	2124.61	1964.03	1214.27	2268.64	12639.5	1413.61
PWY-6876	0	0	168.61	150.34	1453.75	229.383	0	864.987	0	0	0	0	0	0	101.248	0	0	234.792	0	0	0	0	0	105.474	0	105.481	119.378	591.271	218.812	0	146.895	128.766	222.118	252.55	1796.17	0	327.369	231.934	111.235	0	543.301	0	0	0	297.072	146.385	118.795	914.462	0
PWY-6891	715.404	1437.24	2574.21	3399.58	1857.16	1311.45	2991.87	1461.59	1182.43	2964.2	512.872	1689.14	1041.68	2151.83	1668.24	1060.43	1506.14	3312.47	1503.73	1707.67	1279.12	991.878	2900.7	2428.24	1244.37	1958.66	2190.59	2774.63	1716.27	1191.32	2349.32	861.276	1481.07	1074.7	9369.57	2753.59	5514.49	2913.03	1625.6	2194.77	6088.81	1835.27	2068.09	1372.57	2193.12	1787.88	1280.97	4531.91	2572.63
PWY-6892	2751	11628	4828.13	6866.13	7537.93	10854.2	6461.3	9458.18	7202.24	14916	3224.98	11241.5	7268.6	6475.78	9203.51	8647.38	6680.14	8778.08	7679.88	7820.4	5116.27	6891.5	11242.7	20654.4	15927.1	14104.9	10233.2	8498.74	6809.63	5495.42	10348.7	5912.61	5447.78	4832.51	46765.2	15382.7	16681.6	13046.5	8777.68	10186.8	9024.83	11148.1	11020.4	8883.25	13338	6345.16	5120.17	23265	10873.3
PWY-6895	1736.43	4651.3	2765.36	4703.2	5603.61	3910.52	3854.16	4553.33	3571.4	7572.82	1366	5027.67	3098.71	3700.77	4286.56	3794.09	3720.99	4501.45	3904.37	4168.71	3337.51	3130.01	7662.36	8060.6	4627.02	5952.99	5105.65	4748.22	3797.61	2764.36	7381.12	2763.22	3456.57	2993.76	26111	7472.54	13483.4	8024.19	4596.13	5002.01	7357.3	5077.33	6127.53	4118.51	6024.28	4133.23	3306.99	13879.5	6312.85
PWY-6897	2991.05	10332.6	4809.23	5746.96	11529.9	11269.9	7320.68	9420.38	7113.14	16711.3	4333.89	11616.6	5933.66	7615.7	8812.69	10406.8	7212.84	9943.3	7224.76	7987.03	8136.45	6592.21	12805.5	18561.1	13938.8	12618.3	12358.4	7896.65	7701.34	5924.52	15354.2	6433.6	6113.69	5708.75	45924.5	16601.7	20599.7	14024.9	8364.11	9236.01	8975.1	10490.4	11724.6	8051.56	12407.2	6501.39	6010.17	27910.4	9648.29
PWY-6901	2357.32	9206.36	1948.47	5031.42	11066.8	7440.88	3309.37	7685.23	7292.2	9652.29	2210.01	7259.03	3005.06	3202.46	6144.16	8408.21	4815.43	3336.99	6584.14	6924.41	3810.48	3016.48	10559	17869.6	12257.9	11642.9	5632.16	6743.44	5728.25	4165.33	14554.5	5632.99	4766.68	4357.31	42232.2	9790.47	16810.9	12297.7	6281.96	8374.27	8287.5	9996.37	11478	7862.51	8625.69	6090.13	4472.57	29812.8	8893.33
PWY-6906	0	0	0	0	243.226	0	0	0	0	0	0	0	0	0	0	0	0	0	0	0	0	0	0	0	0	0	0	0	0	0	0	0	0	0	0	0	0	0	0	0	0	310.555	92.1746	0	0	0	0	285.221	0
PWY-6969	3393.17	11724.7	3941.88	7108.6	12810.7	7570.66	5584.14	7129.24	8780.92	11068	3361.04	11579.6	4498.69	4480.43	6614.99	10602.7	6153	5480.79	7751.1	8185.95	6111.53	7955.89	11760.9	17938	15541	13975.6	7326.1	6270.75	7306.7	3332.13	19613	6574.62	6451.79	6510.02	42830.5	14908.3	22852.5	15404.7	8382.03	10433	10940.4	13152.4	14895.4	6880.74	10857.6	7616.06	6028.72	36223.4	10140.8
PWY-7003	98.8569	301.25	753.322	203.475	3260.23	307.75	305.459	718.158	341.215	338.062	123.894	174.213	34.3093	300.334	69.721	866.989	164.439	395.02	148.788	41.7266	152.575	94.353	631.052	262.308	683.033	341.952	188.368	608.53	263.637	159.397	208.261	214.826	267.051	208.626	3432.93	41.8822	451.828	795.311	416.271	0	992.061	1605.81	657.476	112.16	395.434	65.425	275.505	3420.81	195.04
PWY-7013	0	863.542	991.343	493.105	1605.57	796.754	1547.94	749.197	2251.91	2001.22	304.588	525.305	178.641	925.785	697.839	1534.4	231.553	634.319	1700.79	273.026	146.282	372.246	1834.56	420.942	596.91	908.466	244.167	215.639	482.384	1042.52	1824.61	1022.77	457.565	0	1480.85	1072.96	1880.34	1333.55	261.253	830.217	1842.54	1112.1	841.212	119.387	2650.39	1438.71	894.404	2636.48	223.097
PWY-7090	21.636	146.652	0	0	288.475	234.371	32.6234	193.273	195.525	444.093	152.975	284.779	0	16.4458	73.4892	162.865	122.911	39.2998	199.46	34.8204	0	55.4199	259.663	91.2273	583.557	558.57	220.91	0	216.75	127.4	92.3946	250.873	269.562	185.18	590.563	332.754	681.073	720.535	58.4711	204.133	55.1335	100.682	87.0454	139.672	32.019	185.522	121.51	200.142	195.639
PWY-7111	5640.36	17708.7	7048.91	9465.41	28778.3	18837.3	13402.4	14967.8	13736	25643.1	7209.64	18784.3	11504.8	12498.4	14039.1	19415.1	12451.9	15423.1	14464.4	14629.2	12698.2	12552.2	19797.7	27286.3	22286.1	26699	18782.2	13774.9	13344.7	10222	25381.5	11369.1	10964.7	11260.8	66763.4	26061.9	28707.5	24038.5	14686.5	16566.5	17081.7	23070.4	20146.3	13593.8	21900.6	12313.7	10290.2	48299.3	16329.7
PWY-7159	60.5183	0	0	0	0	13.4087	37.8563	0	0	0	0	103.864	0	0	0	0	0	0	0	0	0	0	0	0	112.501	0	0	0	0	0	0	0	0	0	73.7018	0	0	0	203.662	0	0	73.6148	0	0	0	0	0	0	0
PWY-7184	1553.04	8014.65	2811.3	4506.83	4563.34	5899.03	3329.44	6111.68	6122.56	6260.43	1904.36	5679.62	4350.45	3339.02	4908.67	7133.78	3498.34	3475.84	4213.5	4850.95	4989.37	5148.63	7194.99	10679	9165.34	8694.38	3762.23	5063.21	4461.35	2262.98	10940.6	3602.32	3615.18	3412.13	28721.9	8684.63	14284.5	8634.43	5260.57	5466.27	8443.08	7173.43	8648.88	3645.44	8273.74	3801.46	3812.75	20031.8	6382.94
PWY-7187	2102.89	8994.2	3476.65	4846.59	8766.22	7506.64	4684.71	7574.24	7377.49	9371.61	2796.21	7874.47	5179.25	4744.25	5915.66	8661.62	4834.89	5048.55	5752.64	5861.68	5812.37	5544.02	8976.33	12043.2	10442.9	11154.2	5848.59	6004.91	5751.13	3373.87	12179.4	4833.23	4716.59	4555.64	34059.9	11494.6	15504.9	11055.7	6290.98	6425.48	8899.18	9238.28	9788.94	5044.89	9547.74	5037.06	4776.98	21629.9	7418.23
PWY-7196	2279.42	10838	3534.09	6020.49	6515.97	8659.39	4685.88	8766.66	8118.18	9107.84	2611.22	8318.09	6515.35	4879.1	7461.51	9889.73	5056.83	5210.81	6008.62	7147.03	6638.95	6609.18	10346.4	21165.4	13363	12708.4	5548.91	7614.22	6277.64	3277.61	15839.7	5067.28	4995.22	4867.02	42467.9	12611.3	20090.4	12193.7	7766.51	8553.38	9937.5	9931.18	12321.4	5366.75	12209.2	5245.31	5312.42	31894	9122.85
PWY-7197	1415.46	6994.86	2572.57	4161.05	4178.67	5300.19	3089.41	5708.3	5550.68	5923.55	1797.58	5397.84	4036.25	3197.47	4411.34	6369.95	3208.3	3266.05	3812.43	4348.43	4662.61	4919.34	6501.33	14248.7	8409.92	8071.15	3507.66	4590.32	4098.09	2089.09	10127.1	3299.12	3357.69	3179.71	25790.3	8316.19	13308.6	7904.08	4699.4	5008.5	7532.01	6614.07	7535.77	3269.18	7592.79	3445.07	3531.35	21600.6	5458.38
PWY-7198	498.676	1087.26	1879.72	827.324	2767.37	1499.46	1312.05	1840.08	1331.99	2046.25	282.895	1899.35	883.009	1233.77	908.07	2320.06	1443.98	1058.84	1655	779.97	841.524	982.385	1140.44	2193.63	1922.2	2492.32	1557.75	1290.79	1469.14	1144.84	2915.79	703.04	957.902	645.572	5656.4	2311.41	2030.17	2247.44	1084.69	1013.14	1882.57	2138.74	1932	797.512	1394.8	1107.73	802.507	4102.48	1890.08
PWY-7199	2764.01	10085.4	3436.55	5434.45	13174.1	9826.09	5899.16	9419.54	8242.56	11880.2	2898.82	9562.72	6352.79	5359.17	7632.04	9184.14	6260.23	6757.12	7724.16	7779.83	3540.98	3726.85	12299.8	18022.3	11800.5	14719.7	8153.21	7480.59	6783.01	5014.35	15624.9	6534.08	5392.86	5764.01	47193.6	13061.5	19815.6	14338.6	8191.23	8754.3	9024.35	10055.3	12812.3	8583.17	11441.9	5983.72	5598.87	28037.6	10087.6
PWY-7200	1735.37	7789.14	2768.08	4279.25	5780.56	6363.03	3737.1	6722.08	6308.67	7225.95	2028.56	6389.22	4640.23	3685	5166.16	7006.64	3913.67	4025.5	4737.93	5201.38	3722.09	3998.45	7991.4	12124.5	8823.61	9776.96	4453.95	5292.54	4756.37	2707.83	11116.8	4080.42	3845.29	3799.88	31474	9444	14605.5	9562.8	5592.85	5942.73	7937.69	7478.12	8880.69	4388.94	8499.35	4079.62	4061.48	20478.4	6602.75
PWY-7208	4872.77	15932.4	5545.82	7754.69	20781.5	16449.1	10662.8	15086.7	12809.7	23202	6535.66	17895.4	10178.9	10977.9	12672.4	16020.4	10776.4	13686.2	12374	12732.3	10505.8	10043	18389	26772.2	19977.9	23609.3	17121.3	12379.2	11698.4	8712.78	21813.9	10289.5	9501.82	9940.64	69969.5	24675.1	26496.3	22320.3	13464.3	14553.7	12895.5	18446.5	18263.7	12674.9	19022.6	10187.1	9489.21	41305.3	14713.6
PWY-7210	600.075	1443.46	2023.09	1072.96	3136.97	1869.99	1538.48	2263.84	1702.55	2463.51	374.208	2290.06	1134.13	1463.95	1169.31	2801.3	1664.91	1288.68	1923.32	1022.27	1103.31	1290.32	1495.34	2814.68	2443.34	3081.16	1792.06	1608.94	1779.42	1266.06	3612.07	906.082	1200.29	836.572	7267.47	2894.72	2689.26	2808.51	1387.44	1313.85	2432.04	2631.51	2445.5	1009	1822.63	1359.8	1031.28	5264.02	2286.98
PWY-7211	1577.95	6958.13	3093.7	4555.8	6088.01	5099.18	3655.11	5761.46	4821.85	7453.81	1939.36	6424.3	5262.01	3737.28	5236.75	7184.89	3687.87	4293.16	3707.15	3952.08	5220.38	6056.05	7768.58	6876.17	9166.25	8557.28	4439.9	2684.19	3088.52	2230.71	8970.35	3449.32	3453.8	3835.15	20098.9	8608.01	13646.3	8392.93	5561.97	2242.73	8706.75	6253.24	5506.41	3241.05	8792.26	3673.04	3928.54	9946.9	5799.77
PWY-7219	4922.19	16158.9	5745.57	7959.72	20582.4	16624.7	10665.6	15012.5	12716.6	23184.7	6439.57	17807.4	10223.6	10797.6	13056.2	16137.2	10840.1	13759.9	12522.9	12778.7	10802.7	10222.1	18395.4	27603.1	20447.2	23990	17152.9	12386.3	11623.7	8872.6	22112.1	10235.8	9508.8	9965.49	70087.1	24716	26667.8	22495.7	13615.3	14430.8	12969.2	18593	18392.5	12802.4	19010	10192.8	9500.28	41590.9	14732.2
PWY-7220	4323.68	18025.4	7351.09	10996.1	26283.9	16565.3	11518.1	13864.7	15912.7	17670.4	6391.22	14665.4	8464.41	8478.65	11417.4	19153.7	9764.26	9907.8	13355.8	13737.8	9907.14	9463.19	19188.4	23966	25376.8	24921	12920.6	11061.5	12413.5	7908.31	31433.1	10683	10474.4	10260.8	62745.2	21052.2	30951.7	24304.9	12959.4	13343.9	17924.3	19873.4	25137.1	11590.9	17978.4	11798.3	10026.7	54860.1	16583.7
PWY-7221	4386.3	14730.5	4938.17	7147.6	20000.6	14651.2	9376.32	13235.3	11517	20776.5	5676.91	15765.6	8769.55	9303.93	11178.1	14617.9	9563.06	11615.1	11477	11212	9429.63	9237.94	16423.6	23694.4	19357.3	20936.1	14809.9	10757.1	10440.9	7759.88	21205.3	9155.46	8578.56	8737.89	60874.2	21650.3	24310.6	20580.6	11835.1	12759.3	11704.3	16610.6	17219.6	11228	16558.7	9374.28	8400.04	40027	13473.3
PWY-7222	4323.68	18025.4	7351.09	10996.1	26283.9	16565.3	11518.1	13864.7	15912.7	17670.4	6391.22	14665.4	8464.41	8478.65	11417.4	19153.7	9764.26	9907.8	13355.8	13737.8	9907.14	9463.19	19188.4	23966	25376.8	24921	12920.6	11061.5	12413.5	7908.31	31433.1	10683	10474.4	10260.8	62745.2	21052.2	30951.7	24304.9	12959.4	13343.9	17924.3	19873.4	25137.1	11590.9	17978.4	11798.3	10026.7	54860.1	16583.7
PWY-7228	2011.79	9991.25	3271.07	5708.78	5954.04	7630.3	4209.93	7693.99	7479.83	8016.39	2378.24	7264.96	5490.35	4227.9	6474.22	8958.56	4437.33	4526.68	5375.88	6315.72	6263.38	6424.97	9165.96	17761.6	12563.2	11109.2	4891.57	6557.08	5635.26	2912.31	14933.8	4537.61	4523.24	4317.21	36773.9	11011.1	18415.5	10968.2	6823.25	7373.48	9711.43	9014.42	11287.1	4740.06	10698.2	4803.08	4766.47	30652.8	8271.56
PWY-7229	4803.68	16915.8	6196.27	8870.8	22277.2	16802.5	11021.2	14804.3	13625.4	21633.7	6448.83	17080.2	9751.57	10224	12765.1	17116.6	10620.8	12636.6	12906.7	13138.7	10660	10141.4	18814.4	26788.5	21889.9	24579.7	16034.9	12141.7	11955.4	8682.55	24674.3	10430.3	9831.57	10146.4	68309.5	23805.9	28211.6	23147.2	13494.3	14387	14501.3	19046.9	20276.4	12537.4	18881	10680.8	9693.8	45712.8	15342.3
PWY-7234	1137.54	4375.88	3058.64	3481.3	8751.65	1400.94	3228.4	3664.36	3061.66	5105.9	1020.32	4599.03	1199.81	2320.97	2170.62	1977.54	1663.57	2569.84	2452.1	2136.79	4274.89	5610.16	5994.21	3546.05	5062.07	4506.33	3459.97	2736.6	1590.99	913.451	5293.58	2185.26	2375.52	2723.03	14876.9	4785.23	9624.02	6811	3279.6	764.534	7958.48	3484.45	2430.29	1984.81	4342.84	2558.47	2837.47	5302.42	3359.94
PWY-7237	668.22	1161.95	1291.08	826.65	8455.47	1070.91	1049.2	532.58	963.3	2297.14	657.28	2229.23	1045.34	847.08	1060.41	1194.92	1462.69	433.75	1399.63	1736.89	814.36	1135.48	1530.75	2033.86	3131.97	2170.01	1510.19	778.11	1514.43	1305.28	1944.86	1685.2	1182.47	1147.85	5413.97	2209.58	2877.52	3377.68	1085.05	1442.41	1103.89	4205.15	1533.59	1146.3	1045.86	2704.47	896.5	2763.63	1364.83
PWY-7242	3081.6	12056.8	3038.91	6926.86	17921.3	12159.5	7014.5	8215.87	7943.96	12155.1	2716.18	9551.62	5962.68	5842.66	9650.21	11927.3	6762.9	8084.02	8824.37	10336.1	5882.72	5503.89	13926.9	22921.2	12670.9	15582.3	10341.8	8729.07	7526.56	6102.88	18696	6996.38	5945.99	5666.14	50727.9	13700.4	19780.7	15296.6	10078.5	12771.1	11125	13954.4	14063.4	9728.5	13109	7539.36	5934.82	38801.8	11776.7
PWY-7254	149.142	154.124	2855.12	3506.4	1111.19	156.989	2504.26	1209.25	1455.78	2663.16	171.869	324.37	185.644	1403.03	730.781	94.8023	111.041	1027.53	172.776	200.429	418.464	246.568	1046.89	191.002	455.598	184.087	173.345	551.863	165.97	81.1032	285.624	420.986	504.073	174.376	1444.79	82.7761	4569.03	753.856	342.41	0	7169.16	1349.63	460.994	426.346	1436.27	38.8821	421.074	1180.15	104.405
PWY-7315	451.579	1250.26	3383.17	3193.84	5429.85	1482.03	2649.02	1279.11	1400.19	2004.19	917.712	1838.42	752.622	1165.88	696.314	1654.33	1238.48	1707.29	1257.96	1014.58	804.322	1004.81	746.039	1645.14	1835.47	2004.9	1900.74	1081.35	1187.03	1123.96	2485.94	698.991	749.818	759.621	4554.01	2009.92	5326.38	2230.59	1023.88	658.026	6767.52	2840.13	1542.92	525.97	981.697	1111.99	742.789	3314.13	1911.78
PWY-7323	2128.78	9645.84	813.696	3314.18	9140.41	7464.59	2099.38	7635.36	6245.87	8289.14	2372.77	7500.45	5088.13	3453.87	6066.71	8394.19	4682.81	4068.44	5848.62	6033.27	4130.92	5302.1	10899.9	16233.5	11295.6	10208.5	6206.99	5062.28	5300.64	3686.57	13923.5	5464.21	4477.69	4740.03	41352.2	11526.4	16857.5	11745.1	7354.77	7420.53	4752.43	8429.77	10894.5	7260.44	9481.59	5530.4	4597.86	27136.5	8934.24
PWY-7328	1032	2022.08	2577.09	2919.16	5995.26	2877.32	2287.1	1585.22	2216.08	3187.9	722.299	4283.76	927.489	1058.54	1259.52	2068.86	1316.98	968.851	2871.55	1381.68	2402.36	3627.09	2162.21	3333.96	2601.86	3061.25	1742.1	830.547	2580.93	1072.2	6354.28	1412.88	2064.76	2784.33	8078.63	4036.32	8200.22	5362.76	2088.24	3431.57	6549.22	5018.26	4718.59	1277.04	2775.31	2508.98	1862.14	12054.8	2511.61
PWY-7332	65.6135	1125.48	275.665	330.164	1120.15	1159.99	1833.27	939.101	1254.16	2226.96	715.397	1346.16	0	50.0229	332.396	1058.95	431.614	185.987	854.752	103.439	0	203.773	896.98	362.763	2164.16	2358.21	1266.25	945.978	1202.72	1752.38	305.92	1606.22	1410.19	746.119	2732.12	1479.73	3966.9	3117.07	190.634	1918.03	252.841	399.547	441.088	487.38	185.469	677.944	435.033	956.067	746.623
PWY-7371	262	782.3	0	0	3255.5	287.5	164	1120	439.5	2204	177.5	1402.4	350.4	598.5	351	1947.5	639.4	319	664	321.5	97	394	1847.5	751.5	1363.5	911.5	1020.3	65	270	489.5	1391.5	602	706.8	988	3361.5	710	1959	2069.4	485.5	0	61	618.5	793	531.5	425	766	846.9	727	845.5
PWY-7374	248.188	705.002	0	0	2117.39	234.041	134.551	1082.18	372.998	2078.06	40.9284	1181.69	256.534	508.553	284.143	1870.15	536.393	264.788	643.492	218.868	97	373.751	1597.53	719.815	1110.69	546.067	927.938	52.668	142.015	411.428	912.708	460.162	601.12	734.979	3087.94	647.513	1626.23	1763.23	446.256	0	0	564.432	708.036	438.285	425	723.541	767.566	160.495	760.052
PWY-7377	108.124	1655.37	836.626	1111.4	4389.39	2084.52	1647.21	2579.37	2066.87	937.656	155.385	779.727	551.958	1486.86	1175.9	569.729	755.339	1564.98	582.743	703.111	375.64	512.884	586.551	1839.07	668.892	790.516	1796.7	2451.51	1013.69	204.731	815.828	1183.67	1576.26	1116.85	7699.57	215.513	2747.53	2094.26	466.745	0	2394.59	513.292	1055.22	189.35	2590.18	623.946	1140.3	5224.65	226.185
PWY-7392	278.008	148.278	3491.31	4628	5958.65	1187.5	4159.24	3738.21	736.41	6397.9	334.327	7.97656	710.476	3505.83	1159.3	469.513	972.472	2814.74	488.514	416.701	1881.83	605.879	1081.12	1326.3	1139.44	1466.56	487.252	3212.98	1025.91	396.196	1367.34	979.698	1978.48	1286.33	8508.68	475.103	8693.76	3973.17	825.247	777.727	8500.73	4308.62	828.391	719.871	3915.77	1788.07	1571.69	6129.67	408.927
PWY-7400	3628.37	11200.5	4586.82	5811.63	15681.8	12037.5	7896.45	9583.34	8381.72	18016.5	5050.8	13794.1	6754.2	8201.83	9208.8	11637.3	7958.38	10597.7	8481.45	9452.52	9982.49	8158.47	12677.8	16662.1	15115.2	15706.3	13450.3	8452.45	8531.88	6579.42	14391.3	7196.94	7023.56	7175.69	43038.5	18590.6	16672.4	15055.4	9171.5	10279.2	9974.57	13803.5	10697.7	8569.72	13628.7	7711.38	7088.63	26130.5	10537.6
PWY-7431	0	0	0	0	0	13.322	0	0	0	0	0	0	0	0	0	0	0	32.0366	0	0	0	0	0	0	0	0	0	0	0	0	0	0	0	0	0	0	13.9901	0	0	0	0	0	0	0	0	0	0	0	0
PWY-7446	0	0	55.2985	0	27.9184	0	17	0	0	0	0	0	0	12.4969	0	0	0	0	0	0	0	0	0	0	13.3109	0	0	0	0	0	13.9443	15	66.5	0	0	0	0	0	0	0	616.159	93.4555	0	0	0	0	6	15.8789	0
PWY-7456	1414.11	4168.21	382.392	1413.75	6527.97	5128.51	948.228	6376.78	3357.5	6038.22	916.798	4739.03	4183.22	2137.46	3978.09	3884.68	2972.43	2753.32	3870.91	3511.55	2086.76	1796.37	6748.24	13406.2	7245.48	6716.67	3715.85	4211.24	3486.37	2274.8	10621.8	3681.47	2865.29	2883.99	32018.3	7003.29	10654.7	7840.94	4669.19	4661.54	2566.12	5355.5	6835.87	4797.14	6903.08	3593.95	2818.9	20984.2	4645.17
PWY-7539	2966.54	10930.9	4271.67	6111.25	11982.5	9585.96	5493.54	9453.07	7678.45	11315.2	2385.28	10691.1	6554.01	5705.71	7531.14	10042.9	6453.78	7045.71	7392.37	7519.94	5681.1	6995.18	12729	18727.8	13176.4	13100.1	9474.48	7922.62	6359.83	4701.74	15787.5	6203.84	5029.46	5146.31	47060.9	13614.9	20068.6	14921.1	9128.68	9177.92	8400.94	10074.3	12434.5	8190.52	12466.2	6196.48	5048.81	30552.5	10512
PWY-7560	4372.3	14736.1	4862.8	7261.53	18360.7	14734.4	9248.83	13497.8	11461.3	20680.5	5639.75	15792.7	8888	9351.01	11512.3	14662.1	9565.46	12206.7	11209.8	11562.9	9389.65	8932.37	16597.6	23888.5	19059.8	21224.8	15211.6	10481.9	10174.5	7869.47	19522	9149.8	8398.46	8805.58	62093.4	22164.7	23858.9	20100.6	12259.2	13322.9	10863.5	16220.7	16966.8	11535.1	16493.8	9207.23	8404.76	37915.2	13553.1
PWY-7644	0	0	0	0	9.00364	0	0	0	0	26.1321	0	0	0	0	0	0	0	0	0	0	0	0	57.0139	11.8337	25.7582	0	0	0	0	0	0	0	0	0	0	0	0	0	0	0	0	0	0	0	0	0	0	0	0
PWY-7663	5387.17	20471.6	5973.89	10010.8	22839.4	18992	11389.9	17192.8	16084.8	24393.5	6781.87	19128.8	11010.8	10897.6	14464	18848.5	11919.4	14348.7	14180.3	15432.4	12155.4	11808.3	22168.9	30761.4	25507.5	27691.6	18087.2	13231.4	12834.5	9961.04	29879.5	12293.2	10423.8	11077.3	78979.3	27184.4	32686.7	26895.2	15533.6	16583.4	14153.3	20162.3	23754.9	14579.8	22015	11553.8	10608.3	59201	18510.7
PWY-7664	1915.66	15070.3	3369.32	7649.58	13255.5	9728.9	3763.76	4443.85	10939.1	8548.4	2681.42	4150.68	1810.6	2904.66	7934.59	11025.1	4233.76	4152.45	7741.61	9851.19	4322.66	3178.4	14459.8	9339.32	17404.7	15922.3	6987.16	4099.84	6606.19	4378.85	26268.8	7245.47	5447.49	4310.96	14990.3	8501.33	21846.5	15270.7	6922.64	7759.13	8683.65	7006.29	17980	5588.31	13255.3	6591.69	5540.76	52702	12443.1
PWY-841	2718.17	11998.8	3965.78	6461.77	8691.89	9982.27	5673.81	9834.04	9081.19	11219.6	3278.29	9791.9	6908.22	5758.7	8256.28	11060.7	6000.1	6401.78	7143.89	8105.68	7545.78	7584.81	11805.7	21272.6	14982	14496.6	7140.58	8245.9	7258.37	4131.52	17344.3	6035.33	5848.56	5729.58	47103.8	14582	21351.2	14144	8787.14	9413.23	10678.2	11604.7	13589	6646.56	13151	6248.05	6074.89	34634.4	10245.2
PWY-922	0	14.8531	143.142	72.8541	143.187	76.3106	37.2572	68.2913	122.704	91.4783	0	0	0	119.702	17.423	12.0533	45.9292	15.4479	34.5676	5.53723	31.4965	57.4846	31.1832	0	7.42139	64.4978	31.1299	399.71	0	46.704	60.957	97.0823	41.3467	9.74092	18.866	22.8313	22.0775	402.576	0	23.8708	666.78	480.459	31.3465	33.311	573.166	0	8.82343	317.309	12.7187
PWY0-1061	1319.3	3555.57	5795.16	6258.77	4877.42	3568.22	6370.94	3113.48	4002.79	6130.09	1987.4	4659.87	2502.44	3978.52	2889.99	3741.5	3611.9	4429.64	4115.84	2340.51	2925.02	2199.08	3893.63	4869.29	4100.04	5263.81	4342.2	5026.5	3286.8	2353.46	4988.69	2454.62	2692.2	1644.48	11942.9	8644.48	11300.8	7400.53	2656.26	2736.09	12474.4	6155.97	3689.17	2082.81	5631.74	3053.58	2232.44	9796.25	3005.74
PWY0-1241	280.084	908.723	1422.28	1987.01	1620.23	335.19	1551.26	693.328	1386.73	2250.64	565.026	1242.41	376.835	1007.07	791.52	438.59	356.732	742.932	378.443	762.408	568.481	2220.44	767.531	466.713	1669.81	921.834	640.861	437.223	618.035	226.827	565.505	776.152	519.082	431.141	1422.82	1585.38	3001.63	1376.74	823.621	289.69	4452.67	1011.96	593.98	462.845	1625.29	945.284	607.339	2003.25	725.796
PWY0-1261	1761.01	6043.86	4471.64	6220.76	8782.08	4790.27	6560.49	3412.67	5500.99	8885.73	1773.79	7374.31	1077.86	3417.46	4167.51	4407.95	2994.49	4658.76	5608.18	5835.62	6549.5	5889.66	7307	4978.89	10331.1	10044.8	5065.64	3256.42	4183.42	1257.46	7126.33	4403.22	3619.93	3132.39	17941.3	9422.42	14109.9	9648.08	4712.85	4130.51	12925.6	9772.22	3355.94	2163.98	7135.96	5532.26	3531.49	9790.42	6039.15
PWY0-1277	0	0	74.6069	0	43.6649	0	35.1751	0	0	0	0	0	0	14.5505	0	0	0	0	0	0	0	0	0	0	22.9087	0	0	0	0	0	17.7016	31.1322	134.935	0	0	0	0	0	0	0	927.993	154.508	0	0	0	0	12.4951	17.7303	0
PWY0-1296	2642.16	7670.75	4813.47	5704.89	14317.2	10287	8258.24	7745.6	7376.04	14649.4	3185.02	10766.8	4896.41	7272.44	7446.22	9309.02	6210.88	9334.36	8017.2	7940.99	5746.42	4943.69	8837.82	13940.8	11217.4	15688.7	10782.1	8463.65	6679.87	5580.53	11027.6	5463.03	5429.59	5642.32	34165.7	10973.2	12846.2	12501.3	6810.22	8569.71	10464	10915.9	9627.96	6605.43	11253.4	5398.15	5052.9	17847.1	7074.31
PWY0-1297	2456.11	7169.79	4384.6	5179.95	13733.8	9351.76	7426.97	7222.97	6984.08	11302.8	3122.45	9479.75	4492.82	6311.26	6515.86	8613.71	5586.33	8723.47	7162.49	7345.29	4786.3	4405.9	8538.12	11262.4	10318.5	13857.7	10006.2	7926.44	6355.9	5260.2	10293.2	5050.12	5313.88	5317.99	31587.5	10846.6	11136.2	10898.2	6212.87	8326.95	9946.97	10315	8717.56	6020.7	10878	5009.19	4552.85	17044.5	6783.3
PWY0-1298	2417.23	7162.04	4266.23	5185.36	13764.7	9443.98	7442.93	7139.39	6967.3	11340.5	3122.11	9416.34	4462.27	6296.15	6511.77	8514.05	5512.38	8605.86	7069.19	7377.09	4687.88	4428.43	8584.31	11312.2	7474.71	13627.5	9944.41	7748.8	6307.74	5185.93	10232.5	5004.74	5340.41	5321.29	31138.2	10951.8	11108.3	10822	6233.32	8337.1	9584.23	10112.1	8625.06	5923.66	10900.5	4946.67	4510.29	16999.2	6811.63
PWY0-1319	4835.65	15281.9	6785.84	9057.37	21078.3	16102.3	11781	14789.5	12512	23860.1	6320.69	18517.9	9489.65	10989	12238.3	15803.9	10675.7	14237.9	12555.1	12736.1	11800.7	10749.4	17770.4	24367.9	20621.7	23785.6	17465.3	12202.9	11382.1	8662.66	20809.1	9852.88	9403.84	9950	64463.8	23467.3	26000.4	21989.5	12858.9	14462.1	15807	18078.8	17357	11627.5	18739.7	9883.38	9417.57	37823.6	14018.2
PWY0-1338	40.9121	16.5292	1499.49	1704.24	802.6	48.1091	1115.2	0	34.4959	257.371	69.1737	1.66172	0	176.027	0	48.7672	64.9595	418.671	27.6796	81.6941	167.569	73.8533	0	78.4119	106.15	0	0	119.24	68.4194	0	161.759	47.7072	196.269	89.7882	0	42.3418	1916.07	374.704	0	0	4008.58	647.079	46.8359	0	62.9849	24.0026	64.6824	240.568	55.9181
PWY0-1415	224.635	424.481	1818.17	2246.48	629.247	95.1414	1567.35	433.162	828.778	492.558	113.379	295.508	196.208	379.787	337.531	242.993	330.936	651.201	67.9616	179.363	476.587	189.121	301.228	214.398	393.245	178.363	371.129	236.516	133.45	0	261.171	361.956	361.511	230.704	1324.91	540.263	2984.99	570.096	645.297	64.0572	5296.09	812.168	633.018	213.702	824.215	104.587	186.018	1483.28	306.608
PWY0-1479	509.905	1328.83	2334.28	2769.62	1597.43	399.326	2400.97	575.131	1368.66	1964.06	369.843	1786.43	488.077	1233.45	1153.22	240.466	889.834	1600.5	679.409	1184.53	3513.24	695.777	1833.43	1446.92	2864.51	2473.99	1011.35	962.121	776.98	0	1841.98	637.845	1188.46	870.277	3867.12	1664.37	5183.9	1490.77	1494.72	656.368	6313.48	1571.64	848.007	528.524	2110.09	1610.49	1394.32	2049.45	1007.72
PWY0-1533	181.016	370.269	1883.04	2419.72	802.31	191.438	1536.33	0	49.6286	457.673	425.401	280.603	142.581	414.58	0	159.1	138.759	707.316	133.823	261.442	247.533	348.798	0	136.487	449.86	0	0	174.745	222.518	30.7402	170.141	180.986	553.713	245.708	721.462	697.783	3076.61	787.459	392.507	0	5354.42	1261.95	67.4014	0	167.531	18.9401	212.104	264.266	275.892
PWY0-1586	2839.32	8240.92	5873.23	6583.24	13281.8	10575.6	9015.59	8220.48	6030.84	16348	5262.99	11710	5930.47	7467.07	7482.06	8170.24	7386.99	10798.9	7166.79	5964.78	6071.33	5035.73	6851.78	16766.7	10966.2	10820.5	12579.8	7585.16	7063.31	6013.88	12462.2	6017	5803.65	5112.48	44987.4	13914.1	13540.5	13370.7	6773.64	6586	11597.6	13119.8	8307.1	6199.72	12006.3	5584.48	5244.22	20577.9	7079.3
PWY0-162	2639.11	11594	3974.18	6351.46	10721.7	9745.78	5503.1	9704.78	8817.95	10891.6	3114.1	9687.84	7054.03	5701.04	8374.55	10959.2	5821.22	6270.49	6859.07	7910.53	7562.21	7703.63	11498.1	21956.8	14580.4	14138.1	6819.27	8278.42	7089.53	3934.9	16577.1	5755.2	5648.06	5522.31	46363	14455.3	20735.4	13683	8683.38	9486.93	10636.5	11317.2	13089.8	6295.01	13242.3	6018.09	5902.02	33377.5	9734.91
PWY0-166	2068.74	9087.36	3499.66	4922.2	7148.18	7424.99	4642.87	7482.27	7372.65	9144.36	2787.59	7686.56	5075.14	4610.27	5797.26	8609.98	4763.35	4916.39	5696.6	5832.68	5703.79	5657.06	8908.73	11849.1	10469	11035.2	5705.66	5897.89	5702.95	3322.84	12254.5	4807.07	4707.76	4524.97	33656	11299.9	15652.5	11005	6238.23	6303.71	9088.39	9203.23	9829.13	4987.17	9423.64	5007.92	4766.36	21840	7435.42
PWY0-321	0	0	159.365	0	40.9012	0	32.3072	0	0	66.6748	0	0	0	109.722	0	0	0	59.9086	0	0	0	0	0	0	21.5655	0	0	0	0	0	42.6513	28.7628	105.485	0	0	0	0	72.255	0	0	1049.04	134.779	0	0	0	0	11.8342	161.615	0
PWY0-41	0	0	54.0614	0	183.508	0	33.2614	0	77.2055	0	0	0	0	19.5778	0	91.4492	0	0	0	0	0	0	0	0	21.6017	0	0	0	0	0	16.462	37.3337	131.818	0	0	0	0	0	0	0	855.485	135.772	0	0	0	0	16.4772	16.9053	0
PWY0-42	34	0	48.4059	0	32.3229	7.22229	37.2318	0	0	0	0	67.8937	0	8.64857	0	0	0	0	0	0	0	0	281.91	0	88.4871	0	0	0	0	0	10.3953	17.1179	75.9443	0	43.1578	0	0	0	113.065	0	713.838	182.817	0	25	0	0	7.29605	13.7214	0
PWY0-781	1143.72	5561.79	4450.54	5016.12	8789.75	2705.08	5729.45	3757.81	5634.13	8945.34	1540	4386.47	2397.63	4690.62	3873.64	4308.69	2987.73	4378.89	3392.05	3417.09	3507.06	6665.52	4612.8	2982.01	5075.81	5107.25	4215.88	4665.27	2889.56	2260.08	4889.67	3157.83	3168.51	2430.62	13582.7	9642.47	10913.6	7280.33	4175.51	2052.74	9858.65	6933.72	3905.12	3161.19	7790.56	3890.71	3008.6	10847.3	1867.85
PWY0-845	1398.69	3746.64	2547.9	4921.06	4647.65	2391.69	2944.24	5003.64	4068.45	3346.55	1225.91	4483.39	940.242	1224.43	3116.72	5537.51	2160.26	1472.91	2686.16	2067.95	1605.33	4289.4	5443.14	12273.2	9366.75	4515.43	1885.59	4326.35	3093.21	1564.19	9701.51	3279.66	2210.81	2253.05	28753.1	5644.31	12507.1	5461.97	3473.22	4644.79	7471.84	6069.64	8165.72	4935.65	3462.04	3694.83	1599.77	16949.9	3874.08
PWY0-862	1709.67	14166.1	3108.68	7271.36	12160.2	8849.84	3359.41	3925	10227.1	7638.76	2410.76	3644.23	1579.17	2567.12	7259.98	10122.4	3777.46	3682.89	7078.18	9129.53	3856.81	2799.6	13386.3	8266.34	16186.2	14604.9	6268.69	3636.98	6008.52	3953.32	25095.8	6662.76	4971.41	3866.47	13110.7	7546.39	20338.5	14032.4	6233.83	7015.84	8410.85	6257.84	16905.9	4992.48	12230.2	6036.06	5057.87	50815.6	11556.3
PWY490-3	611.272	1271.58	1294.68	891.768	3723.54	1935.38	2553	2485.88	2386.47	2316.94	725.696	2137.03	1106.48	1794.12	1441.27	2662.56	1116.9	1787.29	2383.68	2231.03	2080.76	1339.33	2164.67	3710.01	2146.3	6663.71	2067.71	2475.91	1743.53	940.359	2614.03	1252.56	1206.36	1248.24	7352.65	1334.47	2065.6	2906.72	967.185	2275.27	2332.44	2031.08	3537.61	1524.07	2079.38	1427.77	707.505	3451.44	988.669
PWY4FS-7	4161.19	11912.9	5803.86	7084.48	17705.8	13460.9	10064.7	12367.1	10171	19532.8	5640.09	15330.8	7480.69	9296.34	10009.9	12620.1	9031.91	12148.6	10576	10353.7	8448.41	8593	14195.9	22407.8	15579	19177.6	15020.9	11186.2	10105	7532.97	17907.7	8649.7	8046.06	8158.9	59276.4	20057.2	20534.2	17651.5	10266.9	12344.5	13459.1	16044.8	14131.8	10578.1	15049.7	8708.9	7713.3	32080.6	11030.8
PWY4FS-8	4161.19	11912.9	5803.86	7084.48	17705.8	13460.9	10064.7	12367.1	10171	19532.8	5640.09	15330.8	7480.69	9296.34	10009.9	12620.1	9031.91	12148.6	10576	10353.7	8448.41	8593	14195.9	22407.8	15579	19177.6	15020.9	11186.2	10105	7532.97	17907.7	8649.7	8046.06	8158.9	59276.4	20057.2	20534.2	17651.5	10266.9	12344.5	13459.1	16044.8	14131.8	10578.1	15049.7	8708.9	7713.3	32080.6	11030.8
PWYG-321	1965.45	15340.2	3457.66	7774.18	13329.7	9917.74	3817.13	4563.05	11140.7	8696.47	2733.98	4268.95	1869.62	2954.13	8091.31	11291	4332.44	4192.93	7873.37	9927.58	4370.73	3293.01	14662.1	9617.28	17824.1	16147.3	7054.21	4202.2	6755.35	4392.86	26908.7	7358.01	5554.05	4361.24	15476.1	8730.31	22148.6	15459.4	7074.11	7943.8	8761.01	7217.15	18419.9	5736.65	13449.8	6762.7	5607.81	53584.3	12658.4
PYRIDNUCSAL-PWY	3697.73	11879.4	4266.63	5905.78	15114.3	12399.7	7757.78	10959.1	9015.22	16992.4	3549.38	12881.5	7560.1	7843.09	9835.91	11614.4	8038.05	10288.8	9164.98	9690.76	7587.79	6894.95	14058.7	21725.9	15854.7	17352.4	12559.3	9353.2	8506.48	6712.92	17052	7211.08	6411.04	6741.8	52865.9	18174.1	20628.4	16086.3	10351.6	11486.4	8640.73	12973.5	13836.9	9851.89	13855.4	7589.9	6527.32	32105.6	11424.2
PYRIDNUCSYN-PWY	3479.91	11659.2	4147.07	5777.65	13098.8	11318.8	7052.95	11310.2	8489.7	15790.1	4242.53	12796.4	7563.65	7135.22	8880.92	11642.1	7572.97	9588.68	8827.6	8238.63	6524.27	6851.85	13067.8	20484.9	15322.6	15769.4	11741.2	8612.02	8254.29	6256.76	16207.5	6984.08	6477.82	6629.79	52503.3	17886.1	19896	16536.7	9717.97	10002.5	8437.67	12797	13300.4	9252.69	12873.1	7288.54	6206.15	31001.6	10914.7
PYRIDOXSYN-PWY	1109.14	3089.09	1881.62	3909.41	3762.77	1874.32	2121.13	4326.44	3205.83	2615.32	912.579	3499.02	752.796	938.397	2458.69	4656.02	1719.03	1115.84	2112.35	1622.7	1173.91	3333.3	4679.14	12156.4	7889.62	3559.71	1458.51	3423.87	2393.91	1221.03	8178.12	2701.2	1742.58	1782.92	28750.7	4460.57	11075.9	4444.07	2867.26	3662.38	5756.95	4759.36	6813.52	4461.65	2718.77	2925.68	1271.08	14251.6	3176.54
REDCITCYC	154.086	1292.26	2789.07	3999.36	2075.32	1129.68	2891.47	833.487	1183.91	2460.15	857.805	826.09	488.067	1042.79	97.4805	1862.04	577.888	1206.48	1978.65	434.603	492.53	454.214	1672.96	491.152	989.207	1221.93	283.511	400.361	792.146	1250.49	2122.83	880.937	1203.2	545.66	2097.8	1694.77	5317.48	1984.66	357.379	950.864	7830.61	1676.05	547.423	138.942	1143.52	1836.05	1149.07	1834.93	728.726
RHAMCAT-PWY	1804.76	7081.27	2429.52	5050.43	10127.4	6482.1	2909.36	5334.83	4940.13	5964.15	1414.94	4793.4	3939.19	2568.44	4577.87	5822.13	3668.69	3988.01	4809.6	5617.18	2614.6	2718.56	6922.85	12408.5	8950.55	8482.44	4419.47	4839.21	3894.08	2918.54	13454.6	3839.82	3575.28	3470.12	30970.7	6529.86	13592.4	9309.17	5772.61	7448.02	7571.96	8050.6	10362.6	5026.03	7926.4	4102.59	3418.28	27321.3	7085.1
RIBOSYN2-PWY	3419.56	12248	4290.03	6033.37	12939.4	11520.7	6698.47	10649.3	8536.93	16579.5	3186.48	12896.2	6985.11	7174.24	9696.64	12173.8	7300.37	9253.7	8820.08	9578.87	7978.97	7922.21	14547.6	21313	16436.5	15867.3	12050.5	8291.82	7764.02	6122.07	16793	7226.92	6002.72	6761.64	50514.2	15807.4	21108.8	15533.2	10379.2	10986.6	9219.83	11656.2	13328	9310.46	14001.6	7398	6731.24	30729.2	12109.2
RUMP-PWY	555.065	1432.99	1925.58	708.453	2473.74	760.996	1087.27	645.97	1266.36	1488.87	572.95	651.298	1025.27	891.308	1370.37	1573.45	775.979	562.39	1374.36	404.725	743.64	587.261	944.245	1550.37	1117.05	1369.62	646.484	1740.84	1137.91	350.59	920.279	718.596	689.026	113.859	2665.55	656.24	875.366	2226.66	434.233	0	1709.63	1555.26	1328.42	902.314	845.789	900.574	376.468	1834.81	262.457
SALVADEHYPOX-PWY	1609.6	4217.49	3398.52	906.002	14176	5653.34	2022.31	3085.16	2189.16	8006.27	1939.02	3907.71	2294.36	2982.31	2366.85	5029.44	3605.75	2798.82	2894.67	4110.46	1330.8	2704.17	5344.8	2743.17	3793.64	3749.57	3556.71	1916.1	3141.46	3085.16	4388.09	3080.25	3555.54	4608.54	13635	5821.86	4713.17	4639.28	3945.31	3130.45	7583.27	6657.5	2997.63	2121.24	2811.7	3355.68	3617.18	10291.9	2867.94
SER-GLYSYN-PWY	4350.64	13651.9	5065.16	6775.6	18815.1	14548.4	9341.91	12858.6	10778.8	20771.2	5455.77	15753.2	8821.66	9370.55	11177.5	14680.2	9564.86	11784.1	11308.1	11419.8	9280.36	9439.72	16547.9	23860.4	17960.8	21257.9	14856.1	10357.8	10285.4	7869.45	20851.4	9060.78	8134.01	8696.38	58502.6	21852.7	22833.5	19806	11930.5	13094.5	11181.6	16224.5	16168.1	11327.6	16230.4	9126.28	8030.19	37445.3	13060.8
SO4ASSIM-PWY	460.577	1755.43	2160.04	3995.64	3973.71	1232.76	2541.45	1949.82	2887.82	2091.01	1022.47	1988.66	1041.81	1234.47	981.116	2286.92	1198.15	1772.71	2255.17	1951.11	1153.23	2767.12	2864.32	2570.18	2567.35	5495.5	1125.01	1259.23	1315.99	645.891	2822.05	1053.68	1289.96	1405.14	7279.74	2577.81	5916.09	3530.49	1443.91	1761.81	6720.92	4089.18	3725.02	1044.77	2038.38	1774.52	1015.67	3708.73	1062.48
SULFATE-CYS-PWY	917.932	3413.99	3238.34	5230.03	6814.19	2502.76	4199.23	3682.5	4802.51	4162.72	1857.79	3864.58	2041.88	2371.42	1985.81	4280.37	2331.62	3348.7	4051.15	3596.42	2246.09	4598.92	5313.21	5109.34	4888.54	9206.98	2307.57	2464.31	2568.86	1314.68	5509.08	2080.73	2420.35	2616.48	14268.4	5096.55	10254.2	6479.8	2825.55	3407.76	8716.88	6939.89	6606.04	2117.29	3972.76	3234.35	1973.31	7501.37	2171.65
TCA	2823.81	8229.4	4017.17	6266.83	8870.78	4189.77	5042.8	3597.27	6459.48	6852.6	2612.54	9804.72	2271.32	2923.9	3887.89	7254.29	4045.43	3858.77	5365.11	5904.76	5916.91	7567.66	7276.88	10309.3	11647.7	9025.64	4442.49	3499.35	5844.11	1617.98	17401.9	4368.18	5111.57	5067.75	24345.5	11175.9	19873	10905.5	5360.34	8372.52	10713.3	11208.7	11483	3602.02	7150.63	6310.25	4499.52	30477.2	6801.01
TCA-GLYOX-BYPASS	118.962	58.5898	2707.75	3648.03	1266.08	137.366	2506.02	0	99.7621	716.82	212.812	5.94808	0	461.516	0	104.517	131.476	1069.66	88.8906	237.125	495.123	204.913	0	231.809	290.034	0	0	335.854	197.068	0	336.432	138.593	584.716	206.627	0	120.81	5249.01	866.937	0	0	7444.02	1573.64	135.722	0	182.841	38.2567	187.801	493.199	112.608
TEICHOICACID-PWY	431.806	1131.86	2152.67	829.531	1481.12	1404.23	1020.33	943.91	2192.47	2537.59	277.991	1434.27	535.233	1103.84	737.417	1958.1	1174.27	903.353	1461.93	821.52	1158.03	695.935	1040.21	1332.87	1296.08	1289.84	1409.56	927.326	1787.8	1070.47	3412.5	1115.48	655.273	687.46	3337.47	1583.63	2464.67	1842.77	1119.46	773.854	1667.36	1918.15	2480.76	2065.49	1197.32	1708.95	789.846	4496.54	610.293
THISYN-PWY	2706.18	10681.7	2970.44	5376.14	10277.8	8029.82	4347.96	9619.37	7213.54	12640.3	2421.62	10083.2	6243.69	4684.27	7258.86	10194.3	5967.49	5219.8	6632.17	6665.96	5483.71	6750.03	12602.6	19289	14617.9	12385.3	7889.13	6004.31	5579.91	4258.96	14352.2	6115.87	5228.27	5282.14	46998.1	13294.9	20045.6	14026.1	8497.36	7615.2	7926.73	9323.61	11814.9	8297.44	10958	6166.34	5396.12	27386.7	10027.4
THREOCAT-PWY	0	0	380.444	348.949	126.732	0	223.211	0	0	170.854	0	0	0	266.182	0	0	0	191.873	0	115.854	0	0	0	0	63.1845	0	0	0	0	0	111.803	188.823	276.673	0	0	0	425.241	210.67	0	0	1676.88	111.446	168.639	0	268.832	0	35.8204	601.192	0
THRESYN-PWY	4619.7	15722.2	5560.92	7968.97	18685.7	15734.1	9893.39	13921.9	11562	21707.4	5898.94	16363.7	9739.24	10166.3	12068.3	14762	10412.3	12451.4	11618.7	12060.9	9531.46	9213.39	17535.6	26621	19422.3	21968.4	15689.3	11865.4	11126.8	8501.19	21540.2	10053.7	9066.76	9252.6	67950.3	22986.8	26141.8	21292.4	12536.8	13810.9	12796	17689.6	17519	12394.4	17795.2	9830.16	9061.51	41662.4	14230.2
TRNA-CHARGING-PWY	4262.47	13974.8	5145.26	7024.24	18882.3	14337.1	9308.6	13147.2	11096.8	20010.7	5616.65	15470.6	8874.98	9314.82	10917.1	14163.6	9498.19	11754	10899.6	11004.8	9351.19	8652.9	16076.1	23471.4	17630.8	20677.8	14774.8	10649.2	10251.6	7596.25	19994.5	9011.29	8323.67	8655.48	60660.2	21540.8	23821.4	19792.5	11724.4	12460.5	11605.5	16108.3	16261.9	11064.4	16239.2	8969.65	8200.37	37304	12748.1
TRPSYN-PWY	3124.37	12324.7	4969.97	6907.35	11674.5	12361.6	7008.67	10202	9090.97	14893.4	3877.83	11928.5	7135.1	7173.06	9951.93	10715.4	6936.04	10615.2	7871.45	9094.06	6758.62	8166.24	13091.3	21793.5	14629.4	14536.1	12225.9	9476.1	8184.88	6116.2	16585.1	7337.41	6047.53	6025.7	50504.3	18289.7	20079.6	14269.8	9927.52	11733.3	10124.4	12871.2	12691	9169.5	15581.2	6752.95	5934.96	34527.9	10843.3
UBISYN-PWY	203.804	1346.91	1704.51	2212.7	3623.05	301.395	1492.06	0	206.953	939.167	293.839	870.286	189.07	493.497	46.6261	950.117	194.636	689.576	239.453	448.036	267.922	3615.29	1409.62	336.011	1492.07	898.591	231.539	186.837	126.867	88.1508	1031.15	423.367	507.366	546.742	969.427	1709.12	3521.48	942.257	1022.55	79.7229	4914.95	1157.7	259.119	191.989	117.382	358.824	249.942	1483.53	287.978
UDPNAGSYN-PWY	2373.17	7698.74	3404.57	4160.94	9773.43	7928.61	6430.5	7624	6897.39	13295.7	4373.62	8826.83	4481.32	6017.53	5411.5	6876.62	5246.74	7707	6047.36	5769.67	6250.81	6091.58	7329.7	8626.79	9876.71	12343.7	8241.89	5887.26	6434.32	4309.88	8408.67	5179.44	5421.58	5249.65	30695.6	13679.4	11572.2	10206.7	5913.16	6264.86	9190.2	10005.3	7873.33	5465.21	8939.62	5178.54	5162.17	15915.6	6233.33
VALSYN-PWY	5087.13	16619.6	6065.09	8309.35	24198.7	17222.5	11577.3	15582.5	13217.4	23671	6610.23	18135.8	10306.1	10992.1	12934.5	17155.6	11210.8	14033.3	12943.4	13191	11231.3	11929.1	19238.6	27646.7	20941.6	24073.4	17545	12876.2	12024.1	8995.25	22387.7	10625.6	9956.66	10311.7	70299	25076.9	27323.9	23349.1	14110.6	14692.7	14195	19740	18538.4	12831	19239.2	10956.1	9678.66	43081	14951
[truncated: 27 more columns]

## Sheet: Diff_Analysis_ALDEX
MetaCyC pathway	rab.all	rab.win.0	rab.win.1	diff.btw	diff.win	effect	overlap	we.ep	we.eBH	wi.ep	wi.eBH	Interpretation
1CMET2-PWY	3.37664	3.46497	3.27919	-0.216674	0.951837	-0.204058	0.395627	0.230663	0.505104	0.164993	0.389857	.
3-HYDROXYPHENYLACETATE-DEGRADATION-PWY	-9.85036	-10.7178	-8.78976	1.85286	6.65735	0.268702	0.37949	0.11883	0.383237	0.10243	0.317396	.
ALL-CHORISMATE-PWY	-1.2377	-1.31331	-1.15785	0.0476331	7.00891	0.00794402	0.49037	0.638044	0.785193	0.878734	0.931517	.
ANAEROFRUCAT-PWY	3.29848	3.38857	3.20426	-0.176975	0.894224	-0.171729	0.41645	0.484762	0.700627	0.272849	0.51143	.
ANAGLYCOLYSIS-PWY	3.72241	3.79807	3.63317	-0.215928	0.937428	-0.214326	0.402395	0.247492	0.508955	0.167047	0.392412	.
ARG+POLYAMINE-SYN	0.946646	1.20816	0.784162	-0.423592	0.986033	-0.402173	0.324831	0.0125349	0.254198	0.0116043	0.131965	.
ARGDEG-PWY	-3.49189	-3.57535	-3.46734	0.182208	5.32049	0.0300579	0.474232	0.502019	0.701565	0.728639	0.851882	.
ARGORNPROST-PWY	0.101794	0.22971	0.0333453	-0.0498586	1.34835	-0.0342877	0.482041	0.768823	0.860549	0.709347	0.838899	.
ARGSYN-PWY	3.13841	3.33549	2.95985	-0.396803	0.948445	-0.379081	0.334896	0.0410681	0.268744	0.0155304	0.143184	.
ARGSYNBSUB-PWY	3.07524	3.2984	2.85051	-0.444892	0.931806	-0.431559	0.319792	0.0209658	0.255642	0.00774844	0.124173	.
ARO-PWY	3.51458	3.66237	3.37989	-0.307299	0.967107	-0.278538	0.367708	0.104178	0.399021	0.0509433	0.267414	.
ASPASN-PWY	3.44001	3.47657	3.40922	-0.116923	1.03169	-0.113134	0.442478	0.553864	0.737493	0.394005	0.616661	.
AST-PWY	-4.55757	-4.50001	-4.58491	-0.00326042	5.45933	-0.00064078	0.498958	0.689755	0.81464	0.908954	0.948582	.
BIOTIN-BIOSYNTHESIS-PWY	2.64453	2.63919	2.65123	0.142767	1.02052	0.128343	0.441437	0.325027	0.581764	0.373873	0.599732	.
BRANCHED-CHAIN-AA-SYN-PWY	3.65307	3.77715	3.52951	-0.25827	0.955539	-0.248082	0.381771	0.155459	0.471222	0.090586	0.347205	.
CALVIN-PWY	3.68109	3.77907	3.58603	-0.22769	0.922526	-0.228473	0.398751	0.220279	0.501875	0.145368	0.375278	.
CENTFERM-PWY	-0.0632224	0.0506923	-0.112858	-0.179154	1.15932	-0.125227	0.440625	0.564167	0.742965	0.402709	0.623777	.
COA-PWY	3.3676	3.49596	3.25565	-0.26118	0.976591	-0.24831	0.387298	0.186575	0.483274	0.109257	0.355015	.
COBALSYN-PWY	3.11637	3.2721	2.9924	-0.252196	0.99238	-0.230653	0.392708	0.124046	0.436956	0.0913763	0.34703	.
CODH-PWY	-1.84129	-1.63544	-2.0075	-0.374952	4.38782	-0.0544063	0.444271	0.758293	0.855771	0.401938	0.623088	.
COLANSYN-PWY	2.43707	2.58143	2.36322	-0.146322	0.940232	-0.1425	0.434149	0.637998	0.783576	0.300433	0.537525	.
COMPLETE-ARO-PWY	3.58063	3.71744	3.43954	-0.284506	0.967478	-0.275755	0.37012	0.108686	0.406545	0.0547768	0.278631	.
DAPLYSINESYN-PWY	3.22771	3.41177	3.03561	-0.39337	0.923929	-0.37789	0.334722	0.0397136	0.267201	0.014345	0.139817	.
DENOVOPURINE2-PWY	3.10352	3.17468	3.06636	-0.139082	0.911757	-0.139768	0.430208	0.501323	0.708606	0.341038	0.572653	.
DTDPRHAMSYN-PWY	3.57533	3.58474	3.53719	-0.133139	0.949322	-0.137332	0.440625	0.428189	0.668662	0.369986	0.597389	.
ECASYN-PWY	-3.28423	-3.40067	-3.23156	0.31183	5.67855	0.0484399	0.458854	0.455857	0.670708	0.680782	0.825695	.
ENTBACSYN-PWY	-2.23168	-2.14552	-2.26743	0.0584889	6.81058	0.00974581	0.491931	0.612554	0.768025	0.935903	0.963947	.
FAO-PWY	-0.904223	-0.783781	-0.973527	-0.234941	1.54233	-0.128935	0.440625	0.409452	0.652094	0.42157	0.640223	.
FASYN-ELONG-PWY	3.34426	3.34057	3.34823	-0.0118969	1.03267	-0.0135098	0.496354	0.942847	0.965201	0.868215	0.925441	.
FASYN-INITIAL-PWY	2.55778	2.35342	2.59521	0.184359	1.23414	0.147415	0.433854	0.315643	0.574445	0.329308	0.562045	.
FERMENTATION-PWY	2.93835	3.08218	2.85652	-0.208804	0.92224	-0.200376	0.393229	0.342654	0.595322	0.15715	0.38391	.
FOLSYN-PWY	3.15598	3.22012	3.1254	-0.115039	0.957617	-0.117196	0.446642	0.433601	0.671707	0.391236	0.614528	.
FUC-RHAMCAT-PWY	1.26427	1.40212	1.20953	-0.167455	0.687884	-0.224275	0.388542	0.190719	0.485226	0.112461	0.355922	.
FUCCAT-PWY	0.633643	0.93578	0.547696	-0.284672	0.771736	-0.338473	0.364063	0.0349267	0.263513	0.0359305	0.21879	.
GALACT-GLUCUROCAT-PWY	2.15728	2.22145	2.07506	-0.0668621	0.92035	-0.0690014	0.466667	0.737045	0.839448	0.61922	0.788671	.
GALACTARDEG-PWY	-3.92126	-9.41367	-3.24827	2.21366	7.78116	0.366696	0.321187	0.0125007	0.243462	0.00857867	0.125521	.
GALACTUROCAT-PWY	2.72142	2.71711	2.727	0.0215009	0.993154	0.0206554	0.489849	0.870422	0.924348	0.941315	0.966835	.
GLCMANNANAUT-PWY	2.13471	2.33252	1.974	-0.346327	0.836093	-0.352532	0.336979	0.090748	0.378	0.0190756	0.157079	.
GLUCARDEG-PWY	-1.48549	-1.61792	-1.40248	0.164041	1.60599	0.0995144	0.457574	0.935527	0.960655	0.560747	0.751411	.
GLUCARGALACTSUPER-PWY	-3.92039	-9.31264	-3.2398	2.3418	7.75667	0.380221	0.317022	0.0105882	0.23832	0.00828294	0.124958	.
GLUCONEO-PWY	3.45839	3.5326	3.38682	-0.202928	0.939132	-0.194559	0.407292	0.280121	0.526117	0.202971	0.430224	.
GLUCOSE1PMETAB-PWY	-1.73854	-1.4977	-1.94286	-0.453613	2.19308	-0.134694	0.404167	0.149187	0.435575	0.128967	0.367278	.
GLUCUROCAT-PWY	2.08998	2.16543	1.97726	-0.140688	0.910661	-0.147944	0.429464	0.506995	0.711614	0.400181	0.621766	.
GLUTORN-PWY	2.98459	3.17838	2.81884	-0.354083	0.928721	-0.355163	0.346354	0.0559613	0.299845	0.0238063	0.176002	.
GLYCOCAT-PWY	3.77653	3.87519	3.64236	-0.252139	0.952523	-0.248648	0.388021	0.163893	0.474304	0.0956428	0.349539	.
GLYCOGENSYNTH-PWY	3.59342	3.72681	3.41267	-0.334934	0.971398	-0.325059	0.3519	0.0675733	0.329233	0.0318894	0.207497	.
GLYCOL-GLYOXDEG-PWY	-2.30142	-2.09217	-2.4192	-0.209704	3.43633	-0.0377447	0.464862	0.458835	0.673113	0.585506	0.766997	.
GLYCOLYSIS	3.52296	3.58118	3.43497	-0.125038	0.894367	-0.128418	0.45341	0.608682	0.766529	0.414827	0.632348	.
GLYCOLYSIS-E-D	1.29331	1.42801	1.13039	-0.186774	1.33479	-0.0935346	0.436752	0.628534	0.779548	0.330485	0.563625	.
GLYCOLYSIS-TCA-GLYOX-BYPASS	-1.70753	-1.68231	-1.71776	0.137476	6.58209	0.0218451	0.482041	0.479604	0.686217	0.821351	0.901467	.
GLYOXYLATE-BYPASS	-2.21259	-1.70316	-2.35153	-0.388521	3.80015	-0.0728461	0.447396	0.551207	0.731391	0.462811	0.674073	.
GOLPDLCAT-PWY	-5.65782	-5.61957	-5.67818	0.22223	6.69172	0.0322271	0.48125	0.562231	0.735787	0.852097	0.918564	.
HCAMHPDEG-PWY	-10.4668	-11.1425	-9.76192	1.46792	5.75693	0.242654	0.390942	0.201401	0.440357	0.164375	0.369338	.
HEME-BIOSYNTHESIS-II	-2.0457	-1.97716	-2.07	-0.282731	1.90232	-0.121726	0.436979	0.770163	0.861944	0.361453	0.589019	.
HEMESYN2-PWY	-0.0840854	0.017772	-0.179146	-0.24622	1.34513	-0.15647	0.427604	0.374833	0.624597	0.280991	0.519395	.
HEXITOLDEGSUPER-PWY	0.40583	0.537023	0.257519	-0.29211	1.00175	-0.272261	0.389063	0.134351	0.44805	0.100229	0.349501	.
HISDEG-PWY	1.95501	1.82213	2.05938	0.295068	1.26885	0.194827	0.400833	0.0817861	0.360044	0.110531	0.357223	.
HISTSYN-PWY	3.41563	3.53962	3.3203	-0.24533	0.984496	-0.233449	0.391146	0.209758	0.49762	0.130948	0.3659	.
HOMOSER-METSYN-PWY	1.52419	1.82074	1.30549	-0.446576	0.939358	-0.432572	0.304529	0.0257309	0.256931	0.00281028	0.112095	.
HSERMETANA-PWY	1.63825	1.98491	1.46368	-0.449241	0.876715	-0.47133	0.286458	0.0128773	0.254256	0.00138558	0.10506	.
ILEUSYN-PWY	3.72558	3.84477	3.60299	-0.284461	0.947606	-0.280957	0.376563	0.154826	0.470838	0.0878072	0.346066	.
KDO-NAGLIPASYN-PWY	-0.862477	-0.722282	-0.930052	-0.00954555	3.35242	-0.00163248	0.497657	0.786104	0.871584	0.951481	0.973217	.
KETOGLUCONMET-PWY	-11.4854	-11.5657	-11.446	0.118432	6.22028	0.0180657	0.486205	0.575155	0.73637	0.560406	0.718093	.
LACTOSECAT-PWY	-3.61565	-3.28914	-3.70647	-0.2032	5.25475	-0.0352329	0.461979	0.772757	0.863672	0.705242	0.836028	.
LEU-DEG2-PWY	-10.7076	-9.32548	-11.3351	-1.9579	8.47106	-0.239972	0.378646	0.124916	0.384026	0.109923	0.307693	.
LPSSYN-PWY	-10.5255	-11.2557	-9.80637	1.77815	7.35752	0.250358	0.387819	0.0920749	0.350593	0.12103	0.325992	.
MET-SAM-PWY	1.9817	2.26679	1.77718	-0.431535	0.927513	-0.445822	0.300521	0.0279311	0.257577	0.00299658	0.112733	.
METH-ACETATE-PWY	0.954773	1.09715	0.759655	-0.318361	1.14844	-0.26323	0.382292	0.107533	0.405629	0.0926518	0.347687	.
METHGLYUT-PWY	-3.66531	-3.69521	-3.65436	-0.0319589	5.58439	-0.0055369	0.496096	0.691401	0.815498	0.921357	0.95479	.
NAD-BIOSYNTHESIS-II	-0.890605	-0.809402	-0.946124	-0.231762	1.26552	-0.140204	0.419573	0.181632	0.482485	0.232217	0.466156	.
NAGLIPASYN-PWY	2.24578	2.20821	2.2937	0.080685	1.0851	0.0674484	0.467188	0.619942	0.774679	0.716621	0.846831	.
NONMEVIPP-PWY	3.51888	3.62317	3.4125	-0.227052	0.992155	-0.223752	0.395627	0.223042	0.502303	0.143448	0.373977	.
NONOXIPENT-PWY	4.04458	4.14537	3.93133	-0.229261	0.904022	-0.23629	0.388021	0.196123	0.489003	0.125015	0.363133	.
OANTIGEN-PWY	2.90291	3.05643	2.68638	-0.340375	0.942152	-0.3279	0.349818	0.0590737	0.308087	0.0237572	0.176449	.
ORNARGDEG-PWY	-3.48069	-3.57746	-3.45738	0.110974	5.60965	0.0149227	0.486205	0.509788	0.703828	0.734682	0.854299	.
ORNDEG-PWY	-3.573	-3.65726	-3.54163	0.167962	5.2675	0.0294381	0.474753	0.512806	0.707348	0.789412	0.883377	.
P105-PWY	-1.11744	-1.14741	-1.11352	0.115818	6.51958	0.0150731	0.476042	0.456196	0.672738	0.767689	0.872482	.
P108-PWY	2.77881	2.74709	2.82037	0.0448203	1.10153	0.0344428	0.480208	0.483494	0.698429	0.658658	0.814836	.
P122-PWY	0.802718	0.797272	0.804922	-0.134124	1.55742	-0.0777125	0.461979	0.838185	0.90119	0.599043	0.77664	.
P124-PWY	1.13104	1.16377	1.11738	-0.197271	1.62267	-0.0979199	0.451848	0.697976	0.817108	0.499562	0.706043	.
P125-PWY	-2.46589	-2.63587	-2.40476	0.0777706	1.94855	0.0275554	0.480208	0.743311	0.846574	0.821664	0.900988	.
P161-PWY	2.73244	2.95588	2.51294	-0.385296	0.914618	-0.389343	0.331771	0.0388441	0.26661	0.0130128	0.135053	.
P162-PWY	-1.99306	-1.92923	-2.03385	-0.150557	1.86484	-0.0350195	0.465625	0.562333	0.740885	0.595842	0.772538	.
P163-PWY	-0.732423	-0.729314	-0.740455	-0.00785396	1.83223	-0.00185664	0.498699	0.193637	0.488795	0.929293	0.960302	.
P164-PWY	1.24851	1.38002	1.16617	-0.104857	0.943307	-0.11267	0.454688	0.624582	0.775855	0.430456	0.647225	.
P221-PWY	-1.244	-1.06085	-1.35808	-0.5275	1.61937	-0.186961	0.337845	0.0852382	0.340397	0.0290014	0.195426	.
P23-PWY	0.422634	0.438685	0.417566	0.00514808	1.27689	0.00255674	0.496875	0.522714	0.721986	0.92338	0.957581	.
P341-PWY	-11.9417	-11.9843	-11.919	0.272194	5.16896	0.0476256	0.476042	0.449836	0.636865	0.478486	0.65113	.
P4-PWY	2.39677	2.593	2.23798	-0.385705	0.797302	-0.460644	0.288542	0.00956334	0.254029	0.00191421	0.109096	.
P42-PWY	3.42221	3.39839	3.44962	0.0365476	1.05973	0.0292655	0.485685	0.599985	0.76528	0.786921	0.881285	.
P441-PWY	1.80765	2.05154	1.69068	-0.239783	1.13445	-0.129439	0.409896	0.646699	0.790871	0.222414	0.456021	.
P461-PWY	0.195809	0.46621	0.0656392	-0.435327	1.15257	-0.342614	0.335938	0.0308651	0.259576	0.0158538	0.145244	.
P562-PWY	-1.81514	-1.77701	-1.83989	-0.0565867	1.83082	-0.0174168	0.482813	0.283983	0.548314	0.777963	0.876279	.
PANTO-PWY	3.01939	3.06911	2.99696	-0.144045	0.968588	-0.141642	0.431546	0.360764	0.612544	0.304753	0.540691	.
PANTOSYN-PWY	3.09568	3.16551	3.0534	-0.15862	0.989323	-0.153767	0.422917	0.308866	0.557128	0.248956	0.485287	.
PENTOSE-P-PWY	2.52198	2.5381	2.50138	0.120017	0.962484	0.114326	0.450807	0.262692	0.541792	0.465636	0.679417	.
PEPTIDOGLYCANSYN-PWY	3.44854	3.57194	3.33667	-0.24208	0.972745	-0.228874	0.394271	0.18124	0.481531	0.107619	0.35393	.
PHOSLIPSYN-PWY	3.48225	3.61783	3.33436	-0.267755	0.93022	-0.264253	0.38001	0.115577	0.419507	0.0611811	0.297858	.
POLYAMINSYN3-PWY	-0.0436946	0.286199	-0.208858	-0.499152	1.12511	-0.355946	0.317708	0.720483	0.833242	0.00769735	0.123798	.
POLYAMSYN-PWY	0.0968369	0.411375	-0.0240197	-0.427726	1.06402	-0.392088	0.33125	0.0144623	0.25448	0.0140011	0.139488	.
POLYISOPRENSYN-PWY	2.94829	2.97564	2.92622	-0.0772607	1.01297	-0.0713781	0.458854	0.658166	0.795092	0.57419	0.757643	.
PPGPPMET-PWY	-2.39496	-2.19701	-2.45296	-0.115179	4.28087	-0.0208981	0.484375	0.817699	0.890226	0.89589	0.940917	.
PRPP-PWY	2.37929	2.45273	2.31743	-0.254954	0.882655	-0.277918	0.383854	0.0660985	0.324582	0.0946859	0.348318	.
PWY-1269	2.23951	2.19522	2.31671	0.0805223	1.05117	0.0736337	0.471354	0.561058	0.745342	0.640958	0.805221	.
PWY-1861	0.39593	0.619912	0.0906833	-0.600027	1.39344	-0.309616	0.319271	0.0190796	0.255173	0.00918303	0.126617	.
PWY-2941	0.32778	0.605095	-0.0689875	-0.35192	1.34853	-0.24852	0.401874	0.259336	0.517379	0.171561	0.399032	.
PWY-2942	3.67355	3.77389	3.58294	-0.212959	0.972363	-0.208126	0.408121	0.239298	0.507317	0.153822	0.380326	.
PWY-3001	3.64507	3.74683	3.53976	-0.229519	0.97061	-0.210387	0.404477	0.21627	0.500617	0.141156	0.372191	.
PWY-3781	-10.6033	-9.36485	-11.1947	-1.88954	10.1483	-0.189497	0.400312	0.180823	0.448428	0.165762	0.383544	.
PWY-4984	0.790719	0.70948	0.884644	0.305492	1.54719	0.171034	0.421354	0.132537	0.4402	0.26063	0.500102	.
PWY-5005	-2.86896	-2.88565	-2.81534	-0.512966	2.34059	-0.140295	0.411765	0.0127893	0.254406	0.215748	0.450078	.
PWY-5022	-1.33994	-1.3835	-1.31902	0.123389	0.932707	0.0965973	0.445313	0.675695	0.807016	0.520407	0.71933	.
PWY-5028	-11.5157	-11.688	-11.4032	0.441117	6.00387	0.0666587	0.464862	0.470644	0.664447	0.524339	0.69003	.
PWY-5097	3.65351	3.74705	3.5504	-0.210858	0.956023	-0.201928	0.397917	0.218478	0.501219	0.143904	0.37406	.
PWY-5100	3.51797	3.61958	3.42504	-0.226462	0.96684	-0.220544	0.400312	0.239903	0.507699	0.149573	0.377573	.
PWY-5101	3.84383	3.96303	3.7256	-0.290157	0.94838	-0.262935	0.380729	0.152321	0.470143	0.0878797	0.345202	.
PWY-5103	3.63856	3.75771	3.51347	-0.264376	0.974159	-0.252627	0.37949	0.163251	0.474287	0.0974675	0.349907	.
PWY-5104	3.73762	3.87338	3.63689	-0.250122	0.940757	-0.241869	0.385938	0.169275	0.476791	0.0959728	0.349245	.
PWY-5121	3.46217	3.55997	3.36035	-0.222779	1.00116	-0.217166	0.402395	0.24246	0.507895	0.155502	0.382364	.
PWY-5154	2.68545	2.72187	2.66452	-0.0306931	0.984667	-0.0286913	0.487767	0.92268	0.951274	0.814124	0.896041	.
PWY-5177	-1.17523	-1.00511	-1.22717	-0.277414	1.17839	-0.198639	0.410203	0.47424	0.692231	0.191272	0.42213	.
PWY-5180	-10.6459	-11.2198	-10.1874	1.35598	7.00515	0.188768	0.409896	0.206284	0.450577	0.246636	0.44739	.
PWY-5182	-10.6662	-11.1667	-10.246	1.40512	7.09924	0.207274	0.408121	0.214487	0.464367	0.268019	0.474065	.
PWY-5188	1.80239	2.04426	1.53377	-0.567624	0.863711	-0.585913	0.248438	0.000196783	0.0304458	0.000124154	0.0193666	Mildly (effect < -0.5)under-represented in group "Basal"
PWY-5189	1.69565	1.94094	1.41148	-0.61181	0.869672	-0.646316	0.233333	0.000103026	0.0280343	7.32708e-05	0.018026	Mildly under-represented in group "Basal"
PWY-5265	-9.16458	-9.51862	-8.57881	-0.0348168	9.93516	-0.0032447	0.498178	0.715765	0.829881	0.737124	0.84993	.
PWY-5304	0.38748	0.639727	0.24931	-0.26421	1.68429	-0.134772	0.435417	0.451211	0.681939	0.31119	0.547372	.
PWY-5345	1.23275	1.43152	1.17014	-0.286663	0.851041	-0.281791	0.368037	0.0907033	0.374997	0.0546787	0.277996	.
PWY-5347	2.32334	2.62077	2.14923	-0.420143	0.885258	-0.430558	0.298958	0.0391637	0.267375	0.00512297	0.119451	.
PWY-5384	1.81128	2.00512	1.58496	-0.42887	0.819041	-0.473869	0.302447	0.00391926	0.238656	0.00210874	0.109948	.
PWY-5415	-10.6821	-11.1591	-10.2447	1.25376	6.13763	0.194859	0.40625	0.222827	0.475052	0.226213	0.439412	.
PWY-5484	3.30574	3.35438	3.21706	-0.0518353	0.926242	-0.0571523	0.478646	0.935388	0.961038	0.670167	0.817586	.
PWY-5505	3.07068	3.36755	2.82102	-0.473299	1.03727	-0.401985	0.327083	0.0259219	0.256915	0.0131584	0.136438	.
PWY-5507	-10.7176	-9.26413	-11.3524	-1.83905	9.58054	-0.210687	0.389901	0.108326	0.371716	0.111731	0.317678	.
PWY-5509	3.06956	3.23245	2.95015	-0.272124	1.01963	-0.253175	0.381052	0.141546	0.464973	0.105601	0.352586	.
PWY-5531	-11.6051	-11.321	-11.7912	-0.400522	6.18952	-0.060246	0.469027	0.522924	0.702229	0.494382	0.668809	.
PWY-5532	-10.8013	-11.0504	-10.5899	0.970027	6.78768	0.127877	0.438834	0.36036	0.584626	0.384859	0.585742	.
PWY-5659	3.12703	3.15742	3.09825	-0.0607188	1.00417	-0.0511464	0.477356	0.903215	0.939892	0.640217	0.798765	.
PWY-5667	3.65059	3.76894	3.48025	-0.315818	0.919138	-0.31395	0.358333	0.0728012	0.340572	0.0360049	0.221033	.
PWY-5676	1.77491	1.953	1.55959	-0.182934	1.20551	-0.0980329	0.4375	0.554288	0.740186	0.363326	0.591962	.
PWY-5677	-1.61671	-1.734	-1.52589	-0.0970911	1.40022	-0.0429752	0.47267	0.508797	0.714117	0.725997	0.849063	.
PWY-5686	3.62795	3.70918	3.52587	-0.251111	0.991975	-0.221991	0.387819	0.185227	0.482738	0.120991	0.36087	.
PWY-5695	3.32822	3.33918	3.31743	-0.107197	0.930441	-0.0928999	0.453125	0.582418	0.752594	0.553301	0.744573	.
PWY-5705	-2.08215	-2.04331	-2.11637	-0.00911641	1.22809	-0.00529656	0.496875	0.831759	0.900807	0.911091	0.949537	.
PWY-5741	-10.6696	-9.17218	-11.3637	-1.9951	8.3321	-0.241394	0.371875	0.12821	0.392631	0.102207	0.305441	.
PWY-5747	-8.63209	-9.9025	-7.59325	1.22869	6.88875	0.1723	0.423438	0.321626	0.565106	0.270133	0.497037	.
PWY-5837	-1.50908	-1.52704	-1.49708	-0.307374	2.07058	-0.113597	0.422697	0.0312734	0.259897	0.274578	0.513877	.
PWY-5838	0.00260806	0.030461	-0.00589125	-0.220383	1.45777	-0.0969663	0.425	0.0341544	0.262847	0.303679	0.539128	.
PWY-5840	0.00843318	0.0630146	-0.000972096	-0.199868	1.48417	-0.0925688	0.429464	0.0320168	0.260459	0.276097	0.514947	.
PWY-5845	-0.924955	-0.859004	-1.03307	-0.0993991	2.47633	-0.0197424	0.475794	0.592646	0.75854	0.761452	0.867837	.
PWY-5850	-0.923208	-0.855278	-1.0341	-0.150117	2.45644	-0.0291723	0.467465	0.593472	0.761243	0.757926	0.865829	.
PWY-5855	-1.093	-0.935371	-1.17781	-0.132183	1.60032	-0.0591215	0.464341	0.841332	0.904319	0.595473	0.773676	.
PWY-5856	-1.09515	-0.940091	-1.18078	-0.169457	1.61456	-0.0762588	0.454688	0.834828	0.900424	0.590477	0.769606	.
PWY-5857	-1.09315	-0.936061	-1.17898	-0.153479	1.65951	-0.0584665	0.466424	0.846758	0.907406	0.584196	0.765443	.
PWY-5860	-1.45508	-1.38441	-1.56223	-0.146648	2.59725	-0.0293443	0.466944	0.611373	0.770345	0.727014	0.849396	.
PWY-5861	-0.454426	-0.442064	-0.456489	-0.26799	1.67562	-0.10886	0.422917	0.0324013	0.260722	0.291367	0.528604	.
PWY-5862	-1.45227	-1.38338	-1.55312	-0.12601	2.68313	-0.0282011	0.475521	0.642297	0.788058	0.727684	0.850406	.
PWY-5863	-1.31213	-1.33035	-1.30399	-0.340988	1.95759	-0.127587	0.420833	0.030498	0.259271	0.266751	0.504866	.
PWY-5896	-0.923958	-0.860009	-1.03668	-0.128421	2.44577	-0.0242177	0.470588	0.613606	0.772091	0.755736	0.863929	.
PWY-5897	-0.139157	-0.0897262	-0.144057	-0.248833	1.52042	-0.0935196	0.425521	0.0335591	0.261701	0.295534	0.532233	.
PWY-5898	-0.135301	-0.0967155	-0.14121	-0.266811	1.52194	-0.120997	0.421655	0.0326318	0.260235	0.291408	0.529019	.
PWY-5899	-0.138864	-0.10643	-0.145305	-0.226511	1.53834	-0.106748	0.425	0.0326908	0.260755	0.290651	0.528319	.
PWY-5910	-4.35501	-4.12594	-4.5201	0.186431	4.12444	0.0368532	0.471875	0.616754	0.767998	0.777521	0.876464	.
PWY-5913	1.79307	1.73098	1.97971	0.247504	1.09315	0.211779	0.400312	0.0868823	0.368357	0.173417	0.410686	.
PWY-5918	-0.907787	-0.809772	-0.961145	-0.366058	1.64188	-0.1553	0.417708	0.837949	0.901444	0.257146	0.495438	.
PWY-5920	-2.74177	-2.49566	-2.86991	-0.260965	2.77241	-0.0546407	0.449245	0.583146	0.754646	0.526865	0.726104	.
PWY-5971	2.5246	2.43997	2.5847	-0.0213293	1.41215	-0.0070408	0.493229	0.561339	0.741014	0.93288	0.961305	.
PWY-5973	3.74694	3.83584	3.65428	-0.201974	0.988182	-0.189359	0.399792	0.246131	0.508756	0.154766	0.381433	.
PWY-5989	2.81683	2.60619	2.85704	0.197136	1.22288	0.15258	0.436979	0.276307	0.54842	0.289883	0.527941	.
PWY-6071	-9.91529	-10.7986	-8.71311	1.97544	6.89173	0.275117	0.378646	0.117263	0.368083	0.106665	0.312988	.
PWY-6121	3.59122	3.68436	3.49939	-0.219806	0.982387	-0.21044	0.400312	0.253816	0.510995	0.163856	0.388691	.
PWY-6122	3.54401	3.65418	3.44389	-0.248823	0.964434	-0.225913	0.396668	0.210503	0.497639	0.127392	0.364755	.
PWY-6123	3.51028	3.60154	3.41666	-0.210227	0.994451	-0.202917	0.409375	0.273957	0.52119	0.180767	0.405566	.
PWY-6125	2.88366	2.93553	2.83868	-0.105942	0.93226	-0.105324	0.442998	0.687613	0.811377	0.454272	0.663895	.
PWY-6126	3.66661	3.7635	3.57207	-0.195309	0.930693	-0.19535	0.413021	0.277672	0.524424	0.189096	0.413929	.
PWY-6147	2.94424	2.98473	2.91961	-0.115689	0.969564	-0.112346	0.444792	0.422623	0.664038	0.416586	0.634129	.
PWY-6151	3.07045	3.22265	2.91393	-0.297135	1.00147	-0.276304	0.366996	0.100882	0.394167	0.0598028	0.294374	.
PWY-6163	3.52737	3.64016	3.41679	-0.247745	0.967977	-0.233054	0.386257	0.156318	0.472109	0.0932534	0.348168	.
PWY-6165	-11.8668	-11.3538	-12.1765	-0.873775	5.90103	-0.143481	0.424479	0.335702	0.554865	0.322353	0.509749	.
PWY-621	3.19286	3.38831	3.06064	-0.293809	0.884274	-0.304835	0.360938	0.0821506	0.361548	0.049168	0.262142	.
PWY-6263	0.585715	0.510542	0.614209	-0.0136394	1.81161	-0.00367232	0.496096	0.529085	0.722097	0.944124	0.968308	.
PWY-6269	3.07591	3.23816	2.95622	-0.271668	1.01342	-0.23144	0.392188	0.14014	0.463975	0.105587	0.35378	.
PWY-6277	3.54319	3.65678	3.44226	-0.256118	0.971877	-0.243864	0.383654	0.209877	0.497616	0.1268	0.364039	.
PWY-6282	2.79578	2.59741	2.83304	0.19615	1.22283	0.147485	0.439355	0.316417	0.574585	0.325016	0.559434	.
PWY-6317	3.23938	3.41562	3.08012	-0.312611	0.929426	-0.318466	0.354503	0.0765084	0.348161	0.0380148	0.226771	.
PWY-6353	1.96874	2.13646	1.82535	-0.212083	0.90765	-0.197145	0.39771	0.278513	0.525927	0.135576	0.370372	.
PWY-6385	3.44273	3.56301	3.33058	-0.237367	0.969811	-0.224015	0.388542	0.186313	0.483	0.111291	0.355113	.
PWY-6386	3.46539	3.59111	3.35582	-0.257457	0.975221	-0.245084	0.389901	0.186832	0.483226	0.110236	0.35472	.
PWY-6387	3.4575	3.57914	3.34934	-0.238072	0.963729	-0.216737	0.391463	0.18086	0.480686	0.106014	0.353755	.
PWY-6396	-4.55343	-4.8158	-4.26025	0.356287	4.92773	0.0628264	0.45625	0.529498	0.714395	0.507868	0.710622	.
PWY-6467	2.11733	2.08559	2.15574	0.0444779	1.0775	0.0400473	0.478125	0.651985	0.791777	0.762507	0.869454	.
PWY-6470	-1.72572	-1.4415	-1.92906	0.119645	3.47713	0.017242	0.479958	0.62144	0.775423	0.776608	0.876301	.
PWY-6471	1.95948	2.28314	1.83835	-0.421771	1.09535	-0.318444	0.344271	0.103548	0.398052	0.0307255	0.202455	.
PWY-6478	0.403017	0.42707	0.38457	-0.0342312	1.3502	-0.0198362	0.491146	0.644555	0.787451	0.84783	0.915043	.
PWY-6507	2.91336	2.87622	2.93928	0.0558291	1.12331	0.0368716	0.479438	0.58948	0.760552	0.805827	0.890245	.
PWY-6519	2.75112	2.71851	2.78505	0.21059	1.07802	0.171862	0.423958	0.221807	0.511925	0.271602	0.510147	.
PWY-6545	1.74896	1.91693	1.6691	-0.23592	1.03986	-0.206801	0.397396	0.26126	0.515533	0.144408	0.374414	.
PWY-6572	1.08813	0.605354	1.2609	0.788525	1.75986	0.414457	0.308333	0.00330228	0.228974	0.00641536	0.121176	.
PWY-6588	1.76238	1.94508	1.70725	-0.11431	1.46582	-0.0749007	0.464583	0.821434	0.891611	0.578415	0.763844	.
PWY-6590	0.247443	0.379847	0.210492	-0.164488	1.14494	-0.135427	0.446122	0.548448	0.734558	0.380432	0.605817	.
PWY-6608	2.01381	2.13967	1.83379	-0.118871	0.970401	-0.114207	0.44456	0.579102	0.751235	0.342581	0.574676	.
PWY-6609	3.43102	3.54806	3.32518	-0.213917	0.984277	-0.2042	0.396148	0.250941	0.509858	0.161202	0.386718	.
PWY-6612	2.99798	3.04833	2.96823	-0.105694	0.952267	-0.110035	0.439583	0.472919	0.69408	0.44302	0.654231	.
PWY-6628	1.85332	2.2023	1.70613	-0.408786	0.946601	-0.405121	0.329688	0.0460863	0.276852	0.010549	0.128594	.
PWY-6629	0.311556	0.448736	0.166205	-0.107365	2.79442	-0.0236254	0.478125	0.505905	0.709155	0.648059	0.80809	.
PWY-6630	1.84897	2.19871	1.69953	-0.435187	0.971186	-0.39871	0.327083	0.0468532	0.278334	0.0105237	0.129151	.
PWY-6690	-10.4943	-11.1494	-9.80862	1.42272	5.72478	0.22407	0.396148	0.158457	0.409411	0.139127	0.344917	.
PWY-6700	2.8438	2.85078	2.83991	-0.0802838	1.02555	-0.0677954	0.467188	0.847842	0.90678	0.730669	0.851061	.
PWY-6703	2.53312	2.54958	2.52641	-0.112925	1.04665	-0.099219	0.454688	0.680927	0.808062	0.576331	0.760718	.
PWY-6708	-1.08625	-0.928743	-1.18428	-0.140426	1.59926	-0.0641366	0.467708	0.850247	0.90968	0.590946	0.770778	.
PWY-6728	-11.055	-9.63452	-11.6864	-2.20684	8.33026	-0.295766	0.364583	0.0460783	0.284962	0.061597	0.231506	.
PWY-6737	3.93253	3.94641	3.91269	-0.132186	0.967159	-0.124937	0.44404	0.489509	0.702738	0.437254	0.650355	.
PWY-6749	1.06594	0.833724	1.10156	0.178658	1.6507	0.0944065	0.461979	0.415415	0.655213	0.532052	0.733851	.
PWY-6876	-4.29304	-9.86161	-3.59199	1.06211	9.08283	0.125675	0.434149	0.249495	0.516893	0.410145	0.621636	.
PWY-6891	0.686492	0.880234	0.490965	-0.418222	1.07764	-0.346892	0.354167	0.100651	0.395062	0.0363859	0.220965	.
PWY-6892	2.98958	3.08238	2.92739	-0.28472	1.05173	-0.245159	0.399271	0.1709	0.477201	0.121569	0.361255	.
PWY-6895	2.03326	2.16029	1.9944	-0.172977	0.953397	-0.170249	0.420313	0.388399	0.637291	0.263921	0.50063	.
PWY-6897	3.07551	3.1915	2.99223	-0.254004	0.972023	-0.242104	0.390104	0.148163	0.468831	0.099252	0.350892	.
PWY-6901	2.74665	2.76726	2.72688	0.0589111	1.0294	0.0549962	0.472396	0.398739	0.639695	0.730721	0.853558	.
PWY-6906	-11.8923	-11.8535	-11.9219	0.19703	5.70859	0.0269909	0.484643	0.505883	0.691045	0.536514	0.70034	.
PWY-6969	3.06639	3.07773	3.04528	-0.0040648	0.836696	-0.00549859	0.497657	0.659346	0.795156	0.899433	0.943365	.
PWY-7003	-1.73127	-1.9162	-1.58351	0.36706	1.92403	0.139593	0.411979	0.851563	0.9091	0.235503	0.473708	.
PWY-7013	-0.533256	-0.586462	-0.515301	0.0478977	1.56755	0.0182824	0.483082	0.782473	0.870644	0.784552	0.88242	.
PWY-7090	-2.84479	-2.88197	-2.83167	0.0901722	2.95895	0.0218269	0.48152	0.169914	0.469055	0.743991	0.861	.
PWY-7111	3.86738	3.98568	3.71433	-0.276706	0.918269	-0.281162	0.385938	0.146559	0.467858	0.0912506	0.346715	.
PWY-7159	-11.5836	-11.3149	-11.7538	-0.425032	6.15756	-0.0622451	0.466146	0.564756	0.730866	0.544935	0.706591	.
PWY-7184	2.31581	2.47164	2.20191	-0.180389	0.8851	-0.188522	0.413326	0.465306	0.690716	0.204691	0.433655	.
PWY-7187	2.62821	2.76164	2.5154	-0.246264	0.865071	-0.264946	0.391983	0.196284	0.487929	0.109865	0.355522	.
PWY-7196	2.90279	2.97178	2.85813	-0.118561	0.944856	-0.114861	0.443229	0.644906	0.787487	0.427951	0.643397	.
PWY-7197	2.28189	2.3455	2.21167	-0.113423	0.934929	-0.106841	0.444271	0.595052	0.758925	0.381759	0.606408	.
PWY-7198	0.169884	0.413476	0.0390898	-0.340648	1.07857	-0.280648	0.371161	0.0389598	0.266856	0.062405	0.299126	.
PWY-7199	2.98416	3.00617	2.97455	-0.0511248	1.01046	-0.0524844	0.478125	0.796397	0.875638	0.748456	0.860142	.
PWY-7200	2.4113	2.48062	2.35563	-0.0983168	0.919082	-0.0972244	0.452369	0.561122	0.741823	0.406729	0.626917	.
PWY-7208	3.66129	3.78547	3.53373	-0.277774	0.993609	-0.268333	0.384175	0.171401	0.477397	0.0950847	0.349699	.
PWY-7210	0.50464	0.740734	0.376013	-0.303839	1.04045	-0.271214	0.369792	0.0467997	0.278205	0.0796403	0.331915	.
PWY-7211	2.15842	2.23227	2.05988	-0.282785	0.925599	-0.286814	0.3875	0.0522776	0.290391	0.0781277	0.332625	.
PWY-7219	3.67426	3.79406	3.56003	-0.27549	0.969562	-0.254818	0.390104	0.17821	0.479872	0.109399	0.354697	.
PWY-7220	3.77356	3.84732	3.69855	-0.0694777	0.871629	-0.0717816	0.468506	0.710973	0.824082	0.621306	0.78868	.
PWY-7221	3.52918	3.63167	3.43619	-0.215098	0.95355	-0.213823	0.406559	0.238151	0.507253	0.14849	0.376838	.
PWY-7222	3.77425	3.84716	3.69692	-0.0678648	0.847581	-0.0709854	0.465903	0.710313	0.823564	0.621119	0.787624	.
PWY-7228	2.77442	2.81884	2.70394	-0.113119	0.920753	-0.120783	0.445313	0.720213	0.828492	0.476839	0.682342	.
PWY-7229	3.72242	3.81433	3.62774	-0.195648	0.929852	-0.200531	0.4	0.263271	0.514519	0.182171	0.407171	.
PWY-7234	1.38316	1.51956	1.28832	-0.288969	0.95524	-0.287005	0.365104	0.040007	0.268474	0.0722935	0.321836	.
PWY-7237	0.462819	0.409112	0.481429	-0.0328505	1.17174	-0.0277321	0.489328	0.886402	0.929348	0.790535	0.883333	.
PWY-7242	3.21133	3.21369	3.20862	-0.0193868	0.983222	-0.0184777	0.492188	0.923417	0.95497	0.920477	0.955161	.
PWY-7254	-1.36545	-1.42861	-1.34111	-0.148934	2.12176	-0.0595302	0.474479	0.165611	0.474459	0.710735	0.841584	.
PWY-7315	0.338306	0.476027	0.249457	-0.360624	0.916431	-0.354782	0.335938	0.0205032	0.255388	0.0226801	0.171673	.
PWY-7323	2.70648	2.63817	2.74304	0.0674762	1.0981	0.0433326	0.475	0.486754	0.700454	0.744463	0.861922	.
PWY-7328	1.30147	1.2321	1.35922	0.144361	0.98881	0.132465	0.43519	0.284656	0.554595	0.374715	0.60026	.
PWY-7332	-0.387422	-0.154244	-0.612092	-0.0995593	2.45167	-0.0315819	0.475273	0.369357	0.615321	0.778405	0.876457	.
PWY-7371	-0.672308	-0.743076	-0.648634	0.0134029	2.06334	0.0036724	0.496616	0.577715	0.751428	0.954395	0.974042	.
PWY-7374	-0.983355	-0.974236	-0.984882	-0.0350808	2.5489	-0.00491632	0.495055	0.591814	0.757299	0.935391	0.963982	.
PWY-7377	-0.131552	-0.0478462	-0.161942	-0.330838	1.6105	-0.159354	0.408121	0.0631747	0.318157	0.156461	0.386386	.
PWY-7392	0.553456	0.409532	0.628592	0.159146	1.55189	0.077536	0.4633	0.286976	0.552058	0.594678	0.775754	.
PWY-7400	3.14495	3.33698	2.96952	-0.394697	0.949437	-0.366934	0.329167	0.0430166	0.270468	0.0164051	0.146106	.
PWY-7431	-11.9751	-11.7484	-12.1216	-0.446969	5.00486	-0.0742562	0.460417	0.542945	0.71254	0.513864	0.681393	.
PWY-7446	-10.4595	-11.0613	-9.80615	1.73113	5.84735	0.261267	0.377408	0.148322	0.402723	0.147876	0.35503	.
PWY-7456	2.01722	1.92713	2.10532	0.13758	1.3175	0.0951812	0.451327	0.432522	0.666048	0.56613	0.756769	.
PWY-7539	3.01703	3.04056	3.00091	-0.110477	0.984527	-0.101826	0.44456	0.468442	0.692175	0.460138	0.66887	.
PWY-7560	3.51788	3.62187	3.41192	-0.225523	0.988076	-0.211639	0.404997	0.223608	0.503373	0.145793	0.375859	.
PWY-7644	-11.7172	-11.1491	-12.0771	-0.99534	5.46556	-0.171876	0.422697	0.390953	0.595739	0.313126	0.506832	.
PWY-7663	3.90915	3.97	3.84268	-0.157966	0.977537	-0.155017	0.420313	0.361253	0.613187	0.276887	0.515568	.
PWY-7664	2.87801	2.74665	2.91866	0.134005	1.18633	0.109744	0.448958	0.369901	0.616879	0.366479	0.591603	.
PWY-841	3.07593	3.14275	3.03736	-0.132711	0.928336	-0.136076	0.435711	0.531399	0.725821	0.349224	0.580089	.
PWY-922	-4.86382	-4.63503	-5.02279	0.141713	4.07257	0.0308437	0.483602	0.583204	0.751324	0.744975	0.860137	.
PWY0-1061	1.76808	2.04263	1.5608	-0.412126	0.823351	-0.459621	0.309214	0.0141925	0.254349	0.0039597	0.116175	.
PWY0-1241	-0.506954	-0.207332	-0.705725	-0.435875	0.96184	-0.415919	0.332119	0.0201313	0.255161	0.0130812	0.137195	.
PWY0-1261	2.03475	2.20251	1.93842	-0.259734	0.771468	-0.305401	0.342708	0.0508523	0.286412	0.0203015	0.161961	.
PWY0-1277	-10.4963	-11.1506	-9.85108	1.72319	6.40575	0.267024	0.376366	0.126671	0.385301	0.128672	0.336936	.
PWY0-1296	2.79233	3.04234	2.57155	-0.42414	0.907949	-0.424301	0.306771	0.0123803	0.254198	0.00398814	0.117269	.
PWY0-1297	2.64185	2.88428	2.43175	-0.401717	0.905719	-0.398921	0.312858	0.017746	0.254785	0.00655319	0.122341	.
PWY0-1298	2.6304	2.87221	2.42385	-0.399163	0.908798	-0.393201	0.327083	0.0269537	0.257425	0.00893943	0.126045	.
PWY0-1319	3.64849	3.77053	3.47874	-0.302586	0.924227	-0.315815	0.357626	0.0727447	0.340221	0.0356272	0.219299	.
PWY0-1338	-3.78395	-3.98707	-3.76055	0.228765	5.28581	0.0375193	0.474479	0.449252	0.663037	0.635005	0.798246	.
PWY0-1415	-1.71328	-1.69707	-1.72229	-0.201207	1.70767	-0.0797367	0.444271	0.73024	0.840143	0.491371	0.696856	.
PWY0-1479	-0.00433863	0.246845	-0.288425	-0.465052	1.3468	-0.235112	0.346354	0.554202	0.73073	0.0268567	0.188135	.
PWY0-1533	-2.12605	-1.98469	-2.1522	-0.073543	3.03214	-0.0129055	0.489849	0.438627	0.661242	0.915541	0.951816	.
PWY0-1586	2.83622	3.0146	2.61741	-0.408736	0.952814	-0.398984	0.326913	0.0175273	0.254825	0.0099214	0.127496	.
PWY0-162	3.03933	3.13209	2.99418	-0.160948	0.93027	-0.153925	0.427083	0.420327	0.663155	0.288201	0.524939	.
PWY0-166	2.62099	2.74678	2.50552	-0.223334	0.870734	-0.235512	0.387819	0.24777	0.509474	0.121137	0.360197	.
PWY0-321	-9.95603	-10.7058	-8.86309	1.83865	6.999	0.262985	0.382093	0.134076	0.393141	0.115583	0.332482	.
PWY0-41	-10.1016	-10.803	-9.21121	1.63447	6.72132	0.222052	0.394792	0.196355	0.453354	0.189435	0.409672	.
PWY0-42	-9.31221	-10.5909	-7.76624	1.78062	6.8071	0.249513	0.384375	0.15413	0.427382	0.127531	0.350975	.
PWY0-781	1.82214	2.10087	1.61151	-0.398171	0.786149	-0.446484	0.31494	0.0247356	0.256528	0.00869888	0.125724	.
PWY0-845	1.84325	1.74946	1.86672	0.204923	1.09486	0.167269	0.418011	0.146855	0.451686	0.224291	0.462191	.
PWY0-862	2.76168	2.58229	2.80169	0.193843	1.18729	0.15435	0.433628	0.32434	0.580955	0.334231	0.56578	.
PWY490-3	0.637087	1.09363	0.422993	-0.525705	1.12046	-0.430462	0.318229	0.0119902	0.254245	0.00654158	0.122498	.
PWY4FS-7	3.35832	3.53821	3.20439	-0.30269	0.935542	-0.281604	0.359896	0.0935407	0.38454	0.0432066	0.243123	.
PWY4FS-8	3.35803	3.53869	3.2027	-0.306936	0.957884	-0.305691	0.366146	0.0946572	0.38572	0.0438411	0.244055	.
PWYG-321	2.90513	2.79365	2.94463	0.190461	1.17309	0.154563	0.438834	0.361757	0.610955	0.365732	0.591519	.
PYRIDNUCSAL-PWY	3.2458	3.32221	3.16488	-0.215165	1.00281	-0.188018	0.411244	0.248506	0.509293	0.196086	0.421729	.
PYRIDNUCSYN-PWY	3.16914	3.24758	3.08393	-0.173484	1.00501	-0.162159	0.42634	0.278436	0.525083	0.212037	0.442197	.
PYRIDOXSYN-PWY	1.52171	1.44001	1.55979	0.296134	1.18309	0.235297	0.404167	0.0943621	0.380049	0.152249	0.392326	.
REDCITCYC	-0.0838875	0.0820982	-0.162204	-0.0759246	1.47815	-0.0534558	0.478125	0.788447	0.869787	0.730679	0.850583	.
RHAMCAT-PWY	2.36535	2.3243	2.42886	0.103617	1.00904	0.092963	0.457813	0.399228	0.639692	0.56334	0.755001	.
RIBOSYN2-PWY	3.20135	3.28526	3.1507	-0.201128	1.01544	-0.194671	0.409896	0.263924	0.515325	0.204561	0.433508	.
RUMP-PWY	-0.160611	0.0791252	-0.410383	-0.50635	1.30908	-0.27533	0.330036	0.0288104	0.259177	0.0178962	0.153038	.
SALVADEHYPOX-PWY	1.77322	1.98788	1.62342	-0.0948452	1.10237	-0.0828581	0.460938	0.909518	0.943637	0.521798	0.721253	.
SER-GLYSYN-PWY	3.49627	3.59253	3.40863	-0.221898	0.982147	-0.209227	0.404997	0.219722	0.501084	0.137278	0.369709	.
SO4ASSIM-PWY	0.774854	0.867959	0.679752	-0.187973	0.854697	-0.209387	0.404477	0.160368	0.470585	0.157036	0.387235	.
SULFATE-CYS-PWY	1.6476	1.79124	1.54667	-0.203083	0.832187	-0.221213	0.404688	0.165504	0.473985	0.124319	0.363743	.
TCA	2.61925	2.60169	2.62893	0.0830461	0.839356	0.088103	0.455492	0.302038	0.568631	0.560909	0.752093	.
TCA-GLYOX-BYPASS	-2.5859	-2.64538	-2.56377	0.129815	6.01457	0.0212447	0.481771	0.503732	0.704156	0.808381	0.893504	.
TEICHOICACID-PWY	0.101324	0.336717	0.0399292	-0.19084	1.13366	-0.156492	0.438834	0.515479	0.716447	0.324011	0.558047	.
THISYN-PWY	2.90349	2.89455	2.91007	-0.0699907	1.03091	-0.0711496	0.467465	0.806692	0.881973	0.749052	0.860857	.
THREOCAT-PWY	-9.16355	-10.4326	-4.94969	1.82506	8.47943	0.237233	0.382093	0.106105	0.373676	0.109698	0.329354	.
THRESYN-PWY	3.60519	3.69794	3.51178	-0.22293	0.984015	-0.216578	0.400833	0.258843	0.512756	0.174712	0.399035	.
TRNA-CHARGING-PWY	3.47325	3.59138	3.37205	-0.233262	0.971145	-0.225697	0.394586	0.1928	0.486857	0.116305	0.357737	.
TRPSYN-PWY	3.16452	3.24742	3.09171	-0.237887	0.980377	-0.220665	0.410417	0.252287	0.510242	0.173043	0.39865	.
UBISYN-PWY	-1.1181	-0.964126	-1.20982	-0.163043	1.66131	-0.0693268	0.457292	0.846061	0.906867	0.592491	0.772396	.
UDPNAGSYN-PWY	2.57735	2.76144	2.31956	-0.448066	0.961173	-0.425219	0.309214	0.0178614	0.254709	0.00674417	0.122986	.
VALSYN-PWY	3.72404	3.84593	3.60337	-0.263446	0.935687	-0.259994	0.38886	0.153383	0.470352	0.0872522	0.345396	.
